# Supplementary material for: A tale of two nutrients: how nitrogen and phosphorus differentially control marine biomass production and stoichiometry
Source: Research Square preprint supplement (doi:10.21203/rs.3.rs-4203527/v1), 2024-05-06
Supplement: Supplementary file 2 [file cc0c18bd29b8acda2aeb4284.xlsx]

## Sheet: READ_ME
TableS1: Pseudo-nitzschia gene expression (tpm) across all treatments and differential expression significance values when comparing +N-P treatments (N, NF) versus -N+P treatments (P, PF).
Highlighted rows represent genes involved in phosphorus stress response that were differentially regulated between treatments (to a significant and non-significant extent) and were mentioned in the text.
Columns:
Gene_ID:	Unique ID for Pseudo-nitzschia genes.
padj_NF_NP	Adjusted p-value result from DESeq comparing NF versus NP,NPF treatments. Outlier treatment NF2 was removed prior to analysis.
Columns C-AD:	Counts per gene for each treatment replicate in transcripts per million (tpm).
Description:	Description of gene from functional annotation using Eggnog-mapper.
KEGG_ko	KEGG KO number (if applicable).
PFAMs	PFAM ID (if applicable).
X.7	Long-form PFAM ID (if applicable).

## Sheet: Table_S1
Gene_ID	padj_NF_NP	Tote_1	Tote_2	Tote_3	Tote_4	Control_1	Control_2	Control_3	P_1	P_2	P_3	F_1	F_2	F_3	N_1	N_2	N_3	NF_1	NF_2	NF_3	NP_1	NP_2	NP_3	PF_1	PF_2	PF_3	NPF_1	NPF_2	NPF_3	Description	KEGG_ko	PFAMs	X.7
MMETSP0851-20130426|168352_1	0.00229051	4.57124	4.94917	7.66807	3.17386	7.32287	2.81642	1.12205	6.85638	3.29044	5.44127	2.72269	10.7074	7.35391	5.88546	9.16668	12.5132	25.9287	28.931	17.2809	4.643	3.29647	2.99302	2.92072	11.3893	8.85413	2.9104	4.00949	4.52466	Esterase-like activity of phytase	ko:K01077	Phytase-like	FALSE
MMETSP0851-20130426|190570_1	0.0262734	7.28541	11.9605	12.9888	6.80113	7.85544	13.3474	7.99462	3.1017	13.6813	6.65044	6.0737	5.26596	8.27314	10.3635	10.7233	4.89647	35.5557	4.05472	20.5988	6.80973	5.37845	2.36291	0.224671	23.3209	12.1487	6.17004	5.4529	3.48051	Glycerophosphoryl diester phosphodiesterase family	-	GDPD	Name=Pfam:GDPD; Dbxref=Pfam:PF03009.12; Description=glycerophosphoryl diester phosphodiesterase family; Ontology_term=InterPro:IPR004129; score=133.00; evalue=1.20e-38;
MMETSP0851-20130426|189503_1	0.905255	18.285	21.1714	19.8744	16.1716	32.62	14.6944	18.2334	17.3042	12.6422	35.469	50.8934	30.1915	18.9363	198.826	610.535	525.01	1790.36	2710.96	647.826	1132.89	51.3555	547.092	31.0045	13.2875	17.7083	1051.82	342.41	853.247	Na+/Pi-cotransporter	ko:K14683	Na_Pi_cotrans	Name=Pfam:Na_Pi_cotrans; Dbxref=Pfam:PF02690.10; Description=na+/pi-cotransporter; Ontology_term=InterPro:IPR003841; score=156.50; evalue=3.10e-46;
MMETSP0851-20130426|7842_1	0.999835	28.8559	34.2318	26.6035	21.3102	37.5463	19.8374	27.35	18.7734	32.0385	21.5635	130.27	15.9734	81.996	225.95	746.479	1927.31	686.982	878.23	315.895	422.667	57.2544	210.929	110.313	45.8282	37.4756	432.485	162.946	363.365	Na+/Pi-cotransporter	ko:K14683	Na_Pi_cotrans	Name=Pfam:Na_Pi_cotrans; Dbxref=Pfam:PF02690.10; Description=na+/pi-cotransporter; Ontology_term=InterPro:IPR003841; score=171.80; evalue=5.70e-51;
MMETSP0851-20130426|110298_1	0.000110904	11.2852	18.8343	14.5537	13.3	9.71944	12.1228	17.2516	12.57	21.6476	10.0764	12.9852	18.2553	20.0394	35.5686	24.0409	27.4746	172.387	222.571	57.3725	29.2509	18.3908	25.3619	17.2996	8.9487	18.326	36.0889	20.2078	29.5843	selenide, water dikinase activity	ko:K01008	AIRS,AIRS_C,Pyr_redox_2	Name=Pfam:AIRS_C; Dbxref=Pfam:PF02769.17; Description=air synthase related protein c-terminal domain; Ontology_term=InterPro:IPR010918; score=56.80; evalue=2.20e-15;
MMETSP0851-20130426|11400_1	0.000132096	28.2845	26.5331	26.76	29.3204	31.0223	28.1642	26.9293	28.2418	19.3963	44.3362	27.4364	21.9415	38.2403	29.6832	35.2831	32.3711	387.262	537.415	150.551	97.6577	59.8569	95.4615	32.8019	41.2182	35.0047	73.8077	79.7086	90.6673	FALSE	FALSE	FALSE	Name=Pfam:Sulfotransfer_3; Dbxref=Pfam:PF13469.1; Description=sulfotransferase family; score=26.50; evalue=8.80e-06;
MMETSP0851-20130426|175442_1	0.000133351	13.428	11.823	9.23298	11.4863	10.1189	9.67379	15.288	5.06066	5.19543	10.681	7.33033	12.8138	19.4878	21.1109	49.4655	13.6013	35.684	10.7395	29.7231	6.03589	7.80742	4.72582	10.5595	5.69463	15.2373	7.45062	11.8681	10.7896	FALSE	FALSE	FALSE	FALSE
MMETSP0851-20130426|136552_1	0.000187931	8.28537	13.0603	7.35508	7.85908	8.25487	10.1636	13.1841	5.8769	7.79314	13.7039	9.00583	14.7447	4.96389	6.78107	20.9277	23.6663	26.1854	46.6841	45.345	7.11926	11.6244	3.78065	14.1542	2.16938	12.1487	5.8208	5.13214	7.13505	macromolecule localization	ko:K18038	CRAL_TRIO,CRAL_TRIO_N	Name=Pfam:CRAL_TRIO; Dbxref=Pfam:PF00650.15; Description=cral/trio domain; Ontology_term=InterPro:IPR001251; score=40.40; evalue=1.70e-10;
MMETSP0851-20130426|191707_1	0.000266352	18.9992	35.4691	33.0196	18.892	21.1697	16.7761	22.3008	19.2632	13.5081	27.8109	15.4984	16.6755	1.10309	20.0873	28.5378	11.6971	59.1739	28.2734	67.0498	17.1791	21.5138	13.8624	20.8944	19.2533	17.5023	14.2027	42.0194	20.709	FALSE	FALSE	FALSE	FALSE
MMETSP0851-20130426|148432_1	0.000335496	15.8565	19.9342	17.0575	22.6704	13.048	10.2861	15.1477	19.7529	8.48587	26.8033	7.95864	15.2713	18.9363	14.2019	28.3648	12.2412	101.404	224.982	26.8199	22.4411	14.9209	10.5543	20.6697	27.1173	25.121	16.9967	15.3964	12.5298	NAD-dependent glycerol-3-phosphate dehydrogenase C-terminus	ko:K00006	NAD_Gly3P_dh_C,NAD_Gly3P_dh_N	Name=Pfam:NAD_Gly3P_dh_C; Dbxref=Pfam:PF07479.9; Description=nad-dependent glycerol-3-phosphate dehydrogenase c-terminus; Ontology_term=InterPro:IPR006109; score=136.40; evalue=5.30e-40;
MMETSP0851-20130426|190994_1	0.000414657	17.1421	19.7967	20.0309	19.1943	19.7052	22.6538	29.5941	34.6084	13.3349	10.0764	20.5249	24.2234	9.19238	36.0804	26.4623	21.218	66.362	11.6162	28.2024	15.3219	20.6463	14.8076	26.0618	19.7956	23.4737	13.155	17.6417	16.1844	FALSE	FALSE	FALSE	FALSE
MMETSP0851-20130426|128980_1	0.000414657	19.8563	16.0848	8.60701	15.1136	14.1132	11.7555	15.4282	15.835	15.2399	26.8033	22.2004	19.133	19.4878	21.6227	21.6195	16.3216	43.7707	14.9038	63.0407	13.6195	26.3717	20.9511	19.771	11.3893	21.4146	13.9699	25.9815	18.9688	FALSE	FALSE	FALSE	FALSE
MMETSP0851-20130426|191956_1	0.000440375	49.7122	48.1169	42.8786	47.6079	44.8692	53.512	56.8039	41.1383	36.5412	38.2904	47.9613	40.7234	45.2265	72.8006	47.0441	46.5165	126.178	48.7662	42.4419	27.858	35.2202	29.3001	28.9825	25.7614	39.1229	25.0294	29.8306	27.8441	Mannosidase, alpha, class 1B, member 1	ko:K01230	Glyco_hydro_47	Name=Pfam:Glyco_hydro_47; Dbxref=Pfam:PF01532.15; Description=glycosyl hydrolase family 47; Ontology_term=InterPro:IPR001382; score=417.30; evalue=5.80e-125;
MMETSP0851-20130426|2818_1	0.000440375	8.14252	6.73637	12.2063	2.56931	10.3852	3.79604	3.2259	9.14184	3.11726	12.6963	2.72269	5.26596	9.56008	7.54874	8.82077	13.6013	91.6489	200.325	28.8936	7.11926	11.6244	3.78065	5.3921	15.728	4.32411	4.54022	14.1134	11.3117	-	-	-	Name=Pfam:DUF4050; Dbxref=Pfam:PF13259.1; Description=protein of unknown function (duf4050); Ontology_term=InterPro:IPR025124; score=25.40; evalue=9.30e-06;
MMETSP0851-20130426|129186_1	0.000522047	31.1416	28.7327	28.1684	37.4818	34.0846	22.2864	22.8618	33.3024	12.2958	29.6247	34.5573	24.9255	47.6165	20.855	17.8145	14.1454	117.064	164.928	44.9303	21.6673	23.9428	12.2871	47.4055	16.8127	30.6806	16.6475	37.6892	20.361	FALSE	FALSE	FALSE	FALSE
MMETSP0851-20130426|165005_1	0.000587997	12.5709	14.1601	10.7979	10.1261	9.45315	8.44926	18.3736	11.1008	10.3909	16.9284	1.25663	9.30319	2.75771	14.5857	8.64781	10.609	107.822	343.117	39.6769	18.2624	25.8512	10.8694	10.5595	3.52524	11.1191	10.361	10.4247	5.74284	FALSE	FALSE	FALSE	Name=Pfam:4HBT; Dbxref=Pfam:PF03061.17; Description=thioesterase superfamily; Ontology_term=InterPro:IPR006683; score=29.90; evalue=4.00e-07;
MMETSP0851-20130426|165595_1	0.000613986	13.1423	10.5857	7.0421	16.0204	8.6543	10.531	13.8854	9.46833	3.80998	5.64279	1.04719	4.73936	9.00853	8.06052	7.78303	7.88876	59.4306	146.408	10.5068	6.03589	8.15442	7.87636	8.76215	8.13518	8.44231	4.42381	6.41518	9.04933	FALSE	FALSE	FALSE	FALSE
MMETSP0851-20130426|168579_1	0.000613986	55.9977	54.7158	52.1116	56.5249	40.8749	53.512	63.396	45.0562	18.5304	30.0277	40.4215	39.6702	46.6973	45.4204	45.4875	22.5782	134.008	121.203	53.2251	32.501	37.3021	22.6839	45.8328	42.3029	37.2697	39.5814	36.4061	34.9791	FALSE	FALSE	FALSE	FALSE
MMETSP0851-20130426|188875_1	0.000613986	13.8566	15.3974	20.6568	13.6023	12.5154	10.4085	9.11668	8.81534	23.2063	8.46419	7.33033	11.234	25.5548	30.195	25.5975	25.5705	76.2457	14.7942	111.012	9.75029	25.5042	18.4307	11.9075	9.21987	46.7415	10.4774	36.0854	18.0987	FALSE	FALSE	FALSE	FALSE
MMETSP0851-20130426|122133_1	0.000613986	70.8542	73.1377	74.3333	79.7999	63.1098	59.7571	69.988	44.5665	52.1275	56.831	62.8314	70.0373	48.5358	92.504	63.302	55.2213	173.928	124.71	88.2016	35.5963	56.0399	45.9979	46.5068	29.2867	40.3583	40.9784	46.9912	69.7842	FALSE	FALSE	FALSE	FALSE
MMETSP0851-20130426|194757_1	0.000686269	51.5693	64.4767	35.054	56.2227	57.3846	67.7165	62.2739	78.8484	54.8984	23.9819	69.5334	46.516	67.4721	51.8176	53.4435	47.3326	129.258	21.9174	74.5152	32.6557	45.977	37.9641	37.52	69.4202	63.4202	35.5069	48.7554	40.3739	Belongs to the Orn Lys Arg decarboxylase class-II family	ko:K01581	Orn_Arg_deC_N,Orn_DAP_Arg_deC	Name=Pfam:Orn_Arg_deC_N; Dbxref=Pfam:PF02784.11; Description=pyridoxal-dependent decarboxylase pyridoxal binding domain; Ontology_term=InterPro:IPR022644; score=197.70; evalue=1.60e-58;
MMETSP0851-20130426|190308_1	0.00106587	26.2846	32.857	31.6112	34.459	28.7589	28.654	45.3029	27.099	24.4185	78.7976	14.4512	17.0266	23.9002	44.9086	31.9969	73.4471	298.565	593.962	66.2204	36.9892	41.4661	86.4824	23.5904	34.7101	31.7101	36.3218	37.3684	42.6362	Dimerisation domain of Zinc Transporter	-	Cation_efflux,ZT_dimer	Name=Pfam:Cation_efflux; Dbxref=Pfam:PF01545.16; Description=cation efflux family; Ontology_term=InterPro:IPR002524; score=177.70; evalue=2.30e-52;
MMETSP0851-20130426|191726_1	0.00108117	49.7122	53.3411	62.2835	66.3488	50.0618	34.8991	53.7183	50.1169	37.7535	112.453	70.1617	36.6862	89.1661	150.847	186.966	78.8876	794.804	775.547	434.234	210.637	349.946	188.875	61.7844	46.0994	48.5947	119.443	195.823	270.61	Metal dependent phosphohydrolases with conserved 'HD' motif.	-	Guanylate_cyc,PDEase_I	Name=Pfam:Guanylate_cyc; Dbxref=Pfam:PF00211.15; Description=adenylate and guanylate cyclase catalytic domain; Ontology_term=InterPro:IPR001054; score=159.90; evalue=3.80e-47;
MMETSP0851-20130426|9989_1	0.00164895	20.8563	18.147	16.2751	14.0557	20.3709	12.0004	10.2387	10.9376	12.1227	27.2063	16.3362	14.2181	12.5016	17.7843	21.6195	36.7235	83.1772	143.559	25.161	20.7387	13.5329	19.0608	17.2996	23.0497	16.4728	11.5252	13.6323	9.91945	Methyltransferase FkbM domain	-	Methyltransf_21	Name=Pfam:Methyltransf_21; Dbxref=Pfam:PF05050.7; Description=methyltransferase fkbm domain; Ontology_term=InterPro:IPR006342; score=47.90; evalue=1.30e-12;
MMETSP0851-20130426|190340_1	0.00164895	43.8553	46.7422	40.8442	45.1897	42.7389	47.2668	44.6016	53.0553	23.899	30.6323	25.9703	43.5319	54.0512	49.3867	44.7957	9.24889	64.6933	19.7257	90.6901	24.2983	48.406	29.9302	38.868	46.6417	33.1515	17.5788	35.2835	38.1116	FALSE	FALSE	FALSE	Name=Pfam:TM2; Dbxref=Pfam:PF05154.11; Description=tm2 domain; Ontology_term=InterPro:IPR007829; score=57.20; evalue=1.20e-15;
MMETSP0851-20130426|190170_1	0.00173814	23.7133	18.4219	14.2407	9.52158	11.184	21.0619	16.8308	14.529	8.83223	12.8978	32.8818	11.0585	23.5325	10.4915	20.4088	25.5705	77.5293	210.297	31.2438	19.0363	13.8799	11.9721	19.3217	10.3046	14.6196	14.9012	10.4247	12.0078	Trypsin-like serine protease	-	Trypsin	Name=Pfam:Trypsin; Dbxref=Pfam:PF00089.21; Description=trypsin; Ontology_term=InterPro:IPR001254; score=167.00; evalue=4.10e-49;
MMETSP0851-20130426|194457_1	0.00186295	15.5708	19.6592	15.6491	21.0079	14.7789	10.4085	15.9892	11.1008	10.0445	6.44891	9.21527	8.60107	9.92777	16.249	16.4308	3.53634	23.7466	9.64366	20.1841	6.34543	11.6244	6.77367	15.0529	14.3722	12.5605	9.31327	13.4719	8.8753	FALSE	FALSE	FALSE	FALSE
MMETSP0851-20130426|160486_1	0.00186295	13.1423	15.8098	14.2407	15.7182	16.2434	13.4698	19.9164	8.81534	12.8154	40.9103	10.2625	11.4096	18.7525	17.1446	19.3711	28.5627	75.4756	14.4655	66.6351	10.5241	33.8322	25.0468	10.1102	3.52524	16.8846	10.361	18.7644	25.0597	Proteasome subunit	-	Proteasome	Name=Pfam:Proteasome; Dbxref=Pfam:PF00227.21; Description=proteasome subunit; Ontology_term=InterPro:IPR001353; score=70.90; evalue=7.20e-20;
MMETSP0851-20130426|193138_1	0.0027452	19.4278	24.3334	20.3439	19.4966	11.5834	19.1027	22.4411	12.7333	17.6645	16.3238	20.3155	14.3936	9.74392	17.2725	24.9057	17.9537	77.9144	17.9723	28.7554	17.7981	21.6873	11.8145	16.1763	27.1173	16.8846	16.7639	24.5381	17.9246	FALSE	FALSE	FALSE	Name=Pfam:TPR_12; Dbxref=Pfam:PF13424.1; Description=tetratricopeptide repeat; score=70.00; evalue=1.10e-19;
MMETSP0851-20130426|129569_1	0.00277663	24.1419	20.2091	19.0919	18.1363	15.0452	23.8783	19.3554	20.5691	10.7372	21.362	7.95864	14.5692	19.6717	32.6259	12.9717	9.52092	61.6127	17.6435	49.9072	12.3813	28.8007	18.5882	17.2996	7.32166	11.9428	14.7848	18.1229	18.4467	-	-	-	FALSE
MMETSP0851-20130426|190229_1	0.00293043	10.2853	13.8852	15.6491	7.70794	4.79315	6.61246	8.27514	6.20339	1.73181	8.06114	12.7757	0.87766	6.25082	6.78107	14.5283	8.43281	41.9737	7.34233	47.2805	4.1787	11.2774	9.76669	2.47138	5.15228	4.1182	3.95814	12.0285	4.52466	FALSE	FALSE	FALSE	FALSE
MMETSP0851-20130426|92688_1	0.00293043	10.7138	10.8607	10.4849	9.82385	11.8497	9.79624	10.7998	9.63158	1.55863	19.3467	7.53977	16.3245	11.9501	13.4342	16.9497	4.89647	81.7652	6.46563	60.6905	8.35739	29.4947	9.92421	8.53748	0.813518	5.35366	8.84761	26.623	16.1844	FALSE	FALSE	FALSE	FALSE
MMETSP0851-20130426|192538_1	0.00324395	19.1421	14.4351	14.8667	15.7182	13.3143	21.5517	14.4464	9.46833	16.7986	7.85961	3.35101	4.73936	6.61851	15.3534	23.522	14.1454	42.102	3.06844	46.5893	9.90506	21.6873	5.35592	7.6388	9.76222	7.82458	6.51929	22.7739	12.7039	FALSE	FALSE	FALSE	FALSE
MMETSP0851-20130426|189487_1	0.00476169	5.14264	14.985	12.0498	7.55681	35.8155	47.6342	16.5503	11.7538	26.4967	11.4871	28.0647	10.1809	13.4209	2049.03	1359.78	1007.31	9711.06	6878.67	12046.4	1556.33	2363.39	2271.23	17.075	31.456	10.9132	2702.71	1497.78	4367.52	FALSE	FALSE	FALSE	Name=Pfam:NmrA; Dbxref=Pfam:PF05368.8; Description=nmra-like family; Ontology_term=InterPro:IPR008030; score=49.40; evalue=3.10e-13;
MMETSP0851-20130426|189071_1	0.00540246	51.4264	55.8156	43.974	49.8749	46.6001	50.3282	52.5962	47.0152	32.3848	52.5989	36.4422	35.9841	38.608	53.0971	55.0001	81.8799	151.208	552.538	56.8196	30.6438	51.529	53.7168	42.4627	54.7769	61.9789	39.6978	33.8401	43.5064	FALSE	FALSE	FALSE	Name=Pfam:EF_hand_5; Dbxref=Pfam:PF13499.1; Description=ef-hand domain pair; Ontology_term=InterPro:IPR011992; score=56.30; evalue=2.30e-15;
MMETSP0851-20130426|121893_1	0.00540246	0.571405	3.71188	2.97333	0.906817	2.52972	2.20415	1.54282	0.816236	0.346362	4.2321	0	2.80851	0	1.79123	1.90252	5.1685	54.2962	127.778	4.7004	3.09533	2.94947	1.7328	3.14539	0	2.26501	2.44473	0.320759	0.174026	FALSE	FALSE	FALSE	FALSE
MMETSP0851-20130426|191335_1	0.00584123	27.1417	36.9813	32.7067	33.0988	30.6229	26.0825	29.5941	29.5477	19.9158	30.4308	43.982	25.8032	25.0033	29.1714	29.7485	34.0033	66.2337	132.381	35.253	25.5365	31.5767	17.328	21.7931	23.0497	28.2097	20.4892	24.6984	16.7064	FALSE	FALSE	FALSE	FALSE
MMETSP0851-20130426|24198_1	0.00602847	5.5712	9.07348	10.1719	9.82385	6.12458	8.57171	8.55565	16.1615	1.73181	0	14.4512	14.5692	9.19238	5.24573	12.6258	1.0881	22.9764	2.08215	8.84781	3.09533	4.85795	2.20538	10.3348	10.3046	7.82458	4.88947	4.16987	3.30648	FALSE	FALSE	FALSE	FALSE
MMETSP0851-20130426|74356_1	0.00622977	27.856	37.6687	31.1417	39.7488	31.688	24.858	30.2954	28.8947	27.8821	48.1653	47.5424	31.5958	36.5857	55.4001	56.0378	64.1982	154.674	178.956	62.3494	36.5249	31.2297	54.3469	33.7006	60.7427	39.7406	35.7397	26.4626	36.7194	Caspase domain	-	Peptidase_C14	Name=Pfam:Peptidase_C14; Dbxref=Pfam:PF00656.17; Description=caspase domain; Ontology_term=InterPro:IPR011600; score=83.90; evalue=1.30e-23;
MMETSP0851-20130426|193216_1	0.00644981	47.8551	45.5049	45.2259	49.4215	38.7446	53.1446	36.607	34.4451	8.65905	20.5559	21.3627	21.766	16.3624	34.5451	26.6353	30.1949	105.64	85.8066	40.3682	23.6793	25.3307	21.4237	50.5509	30.6425	30.2688	27.1249	31.5948	19.4909	FALSE	FALSE	FALSE	FALSE
MMETSP0851-20130426|63816_1	0.00644981	1.99992	1.09982	1.56491	3.17386	2.39657	0.857171	0.42077	2.12221	4.32952	0.604585	0.209438	1.57979	0.183848	2.30301	2.94026	6.52863	31.5765	12.9313	8.01833	1.54767	0.520495	2.99302	1.12335	0	1.02955	2.2119	3.04721	0.870128	FALSE	FALSE	FALSE	FALSE
MMETSP0851-20130426|192472_1	0.00700998	84.5679	76.5747	56.9628	76.7772	67.7698	60.6142	61.1519	47.0152	54.3788	62.0707	47.7519	59.8564	77.216	51.5617	55.173	26.6586	103.201	207.777	61.1052	34.0486	44.7626	29.7726	58.1897	33.6254	50.0361	35.9725	53.0856	45.7687	FALSE	FALSE	FALSE	Name=Pfam:Abhydrolase_5; Dbxref=Pfam:PF12695.2; Description=alpha/beta hydrolase family; score=53.30; evalue=2.10e-14;
MMETSP0851-20130426|192043_1	0.00816716	17.4278	25.8457	19.5614	21.1591	24.4983	24.7355	27.2098	22.2016	11.6031	44.7393	12.3568	38.0904	36.218	264.59	160.157	297.325	2997.59	2450.47	2347.16	553.909	521.709	813.786	18.423	23.592	31.916	662.174	156.851	1325.2	FALSE	FALSE	FALSE	Name=Pfam:7tm_3; Dbxref=Pfam:PF00003.17; Description=7 transmembrane sweet-taste receptor of 3 gcpr; Ontology_term=InterPro:IPR017978; score=48.70; evalue=5.20e-13;
MMETSP0851-20130426|45132_1	0.0096969	14.5708	14.2976	22.2217	16.0204	6.65715	18.6129	9.6777	23.8341	16.1058	7.05349	7.74921	20.5372	11.9501	8.44435	16.0849	9.79294	47.6215	6.13687	21.2901	10.6789	13.3594	4.09571	11.4582	49.8958	16.6787	9.42969	7.53784	5.91687	FALSE	FALSE	FALSE	FALSE
MMETSP0851-20130426|160538_1	0.00978394	11.4281	15.6724	18.466	14.0557	15.4446	11.633	17.3918	21.8751	20.6085	19.5483	18.64	11.7606	10.2955	31.4744	36.8397	36.4515	102.688	123.505	100.506	42.0965	17.5233	40.0119	8.98683	8.9487	18.1201	37.1367	28.7079	37.5895	SPX domain	-	SPX	Name=Pfam:SPX; Dbxref=Pfam:PF03105.14; Description=spx domain; Ontology_term=InterPro:IPR004331; score=71.10; evalue=1.10e-19;
MMETSP0851-20130426|27972_1	0.0104992	1.99992	1.37477	1.25193	1.36023	0.932001	1.59189	2.66487	0.979483	0	0.201528	4.81707	0.526596	1.65463	5.88546	7.61007	2.72026	25.1585	3.83554	22.6725	2.16673	3.64346	0.945163	0.224671	0	2.67683	0.58208	1.92455	5.74284	FALSE	FALSE	FALSE	FALSE
MMETSP0851-20130426|13884_1	0.0120451	14.8565	11.5481	14.7102	19.3454	10.252	15.5515	11.6413	11.2641	8.13951	19.7498	15.7078	13.516	24.8194	13.3063	20.0629	10.337	36.9676	10.7395	20.4606	13.1552	13.1859	12.1296	12.1322	16.5415	17.0905	6.63571	9.46239	11.1376	FALSE	FALSE	FALSE	FALSE
MMETSP0851-20130426|437_1	0.0128279	19.7135	43.3052	10.4849	28.4136	26.7617	20.817	25.3864	26.9358	25.6308	54.2111	28.9024	26.5053	32.9087	17.5284	25.5975	42.7081	151.208	160.874	40.6446	27.3937	32.4442	38.1216	31.0045	26.3038	43.447	24.913	22.2927	39.3298	FALSE	FALSE	FALSE	FALSE
MMETSP0851-20130426|194625_1	0.0130209	50.4265	41.3806	38.3403	42.7715	33.552	30.9806	45.5834	30.364	23.0331	24.9895	33.0912	33.1755	46.6973	41.4541	34.2453	29.3788	72.0098	62.9029	94.4228	43.6442	42.8541	36.0737	36.3966	21.6938	26.7683	52.1543	39.1326	50.4674	Belongs to the Orn Lys Arg decarboxylase class-II family	ko:K01581	Orn_Arg_deC_N,Orn_DAP_Arg_deC	Name=Pfam:Orn_Arg_deC_N; Dbxref=Pfam:PF02784.11; Description=pyridoxal-dependent decarboxylase pyridoxal binding domain; Ontology_term=InterPro:IPR022644; score=113.30; evalue=9.20e-33;
MMETSP0851-20130426|155425_1	0.0130209	23.7133	19.7967	29.2638	21.9147	10.9177	29.5112	12.0621	17.3042	8.83223	9.47183	22.6193	5.96809	14.1563	11.0032	25.0787	11.1531	46.0812	3.83554	17.6956	6.50019	14.2269	6.9312	9.66084	4.88111	7.82458	4.07456	10.4247	5.39479	FALSE	FALSE	FALSE	FALSE
MMETSP0851-20130426|14163_1	0.0134348	16.1422	17.597	10.9544	14.2068	20.2377	22.5313	18.6541	14.8555	36.7144	86.4557	10.4719	16.3245	13.4209	26.8684	28.8837	17.4097	51.4723	29.3693	151.104	13.0004	24.2898	21.1086	13.9296	6.50814	17.5023	13.5042	58.2177	23.6675	Choline/ethanolamine kinase	-	APH	Name=Pfam:APH; Dbxref=Pfam:PF01636.18; Description=phosphotransferase enzyme family; Ontology_term=InterPro:IPR002575; score=58.40; evalue=7.70e-16;
MMETSP0851-20130426|148506_1	0.0134348	6.71401	6.73637	5.94666	5.59204	4.39372	7.22473	6.59206	5.06066	0	2.61987	17.3834	3.8617	13.0532	2.94273	4.84277	1.90418	26.4421	15.4518	6.22112	3.55963	4.16396	1.89033	5.3921	4.33876	4.94184	2.09549	2.40569	2.61038	FALSE	FALSE	FALSE	FALSE
MMETSP0851-20130426|11669_1	0.0134348	17.4278	30.3824	16.4316	16.3227	16.3766	16.6536	31.2772	26.1195	23.5526	22.9742	9.84359	32.1223	24.2679	38.8952	78.1762	33.7312	111.031	53.0401	127.187	31.1081	75.9922	30.0877	41.7887	41.4894	26.3565	31.3159	50.6799	42.1142	FALSE	FALSE	FALSE	FALSE
MMETSP0851-20130426|143536_1	0.0146189	4.28554	4.39926	5.79017	5.4409	5.59201	6.73491	4.62847	5.5504	3.80998	3.62751	0	1.22872	2.94156	6.65313	2.24843	0.816078	14.8897	0.328761	3.87092	1.3929	0.520495	0	1.57269	0	1.64728	1.74624	1.28304	0.522077	FALSE	FALSE	FALSE	FALSE
MMETSP0851-20130426|140976_1	0.0148647	6.4283	5.49908	7.35508	6.49886	3.728	3.42868	3.64667	7.01963	2.25135	1.61223	14.0323	5.61702	2.94156	5.62957	9.8585	11.1531	42.7438	1.31504	30.8291	7.42879	10.0629	2.99302	7.86347	8.40635	5.76548	12.9222	19.4059	2.61038	FALSE	FALSE	FALSE	FALSE
MMETSP0851-20130426|179135_1	0.0152789	3.71413	8.24862	7.19859	3.7784	6.92344	4.04095	3.92718	6.85638	7.61996	4.2321	0.628314	1.93085	6.98621	1.79123	2.42139	5.1685	0	2.95885	0.829483	3.86916	5.37845	6.30109	6.51545	9.21987	6.1773	2.56115	3.04721	3.82856	FALSE	FALSE	FALSE	FALSE
MMETSP0851-20130426|190470_1	0.0153077	50.7122	53.0661	31.1417	63.9306	48.3309	29.7561	55.4013	47.5049	46.2393	81.0144	129.223	46.867	86.7761	54.2486	85.4404	54.6773	432.958	420.266	185.804	135.266	83.4527	89.3179	98.6304	78.3689	60.5375	96.6252	106.492	133.304	Metal dependent phosphohydrolases with conserved 'HD' motif.	-	Guanylate_cyc,PDEase_I	Name=Pfam:Guanylate_cyc; Dbxref=Pfam:PF00211.15; Description=adenylate and guanylate cyclase catalytic domain; Ontology_term=InterPro:IPR001054; score=155.70; evalue=7.00e-46;
MMETSP0851-20130426|14590_1	0.0160006	82.7108	40.2807	79.341	73.1499	16.6429	93.6765	16.5503	270.664	37.4071	3.42598	56.1294	45.8138	2.20617	47.9793	83.7108	3.80837	280.723	28.0543	130.229	5.88113	41.4661	3.62313	22.0177	71.0472	9.06004	5.47155	8.50011	26.6259	FALSE	FALSE	FALSE	FALSE
MMETSP0851-20130426|150054_1	0.0161312	2.99987	2.74954	1.09544	2.11591	1.99715	0.734718	0.701283	5.5504	8.48587	9.06878	6.0737	1.57979	0.183848	6.90902	5.18869	2.44824	19.3823	3.83554	30.4144	0.4643	4.51096	5.35592	2.24671	7.05049	4.1182	0.349248	5.77366	3.82856	FALSE	FALSE	FALSE	FALSE
MMETSP0851-20130426|145379_1	0.0161312	8.57107	7.01132	6.10316	12.0909	9.71944	5.51038	5.47001	5.38716	2.25135	3.82904	7.53977	1.57979	13.4209	11.8989	16.7768	14.1454	95.4997	124.272	29.5849	16.2505	24.9838	13.0748	4.71808	12.4739	5.14775	10.4774	20.2078	15.4883	FALSE	FALSE	FALSE	FALSE
MMETSP0851-20130426|187977_1	0.0164857	4.42839	9.62339	5.16421	11.9398	7.32287	7.34718	6.4518	7.50937	3.29044	8.46419	6.91145	7.37234	2.75771	3.32656	8.3019	4.89647	0.898519	1.09587	1.52072	4.95253	6.93993	4.88334	7.41413	11.1181	9.67777	4.88947	16.0379	7.4831	Pectinacetylesterase	-	PAE	FALSE
MMETSP0851-20130426|188381_1	0.0164857	1.57136	2.06215	0.625965	0.906817	5.72515	4.65321	4.34795	2.44871	0	8.46419	0.418876	0	0	1.79123	5.5346	2.44824	51.4723	158.353	9.53905	1.08337	2.42898	3.93818	3.8194	0	18.1201	1.04774	3.20759	0.348051	FALSE	FALSE	FALSE	FALSE
MMETSP0851-20130426|193644_1	0.0165132	56.8548	47.567	38.8098	41.4113	52.7246	48.7363	60.8713	42.281	34.1167	28.617	20.7344	38.4415	29.2318	46.0601	52.4057	38.6277	104.87	231.886	44.5156	39.0012	39.0371	25.8345	37.2953	46.9129	53.5366	42.3754	34.9627	28.7142	FALSE	FALSE	FALSE	FALSE
MMETSP0851-20130426|193063_1	0.0165441	13.428	22.5462	29.2638	19.7988	17.5749	13.4698	20.3372	10.6111	6.23452	6.24738	11.3097	16.5	11.5824	13.4342	12.4528	12.2412	2.69556	4.16431	5.66813	11.917	12.1449	14.8076	17.2996	14.6433	12.7664	16.8803	15.7172	12.7039	FALSE	FALSE	FALSE	Name=Pfam:FHA; Dbxref=Pfam:PF00498.21; Description=fha domain; Ontology_term=InterPro:IPR000253; score=41.90; evalue=7.10e-11;
MMETSP0851-20130426|149021_1	0.018528	2.71417	4.26179	4.53824	4.08068	8.25487	5.14303	4.34795	5.8769	6.75406	0	0	1.75532	11.5824	1.66328	4.15095	2.72026	0	0.657522	0	1.23813	4.51096	1.10269	6.51545	0	2.47092	1.97907	6.09442	4.69869	FALSE	FALSE	FALSE	FALSE
MMETSP0851-20130426|43751_1	0.0188075	30.1416	14.985	17.527	19.1943	23.1669	26.0825	15.4282	16.8145	16.279	24.9895	15.4984	33.1755	15.4432	13.4342	8.12894	8.70484	20.9226	19.6161	15.4837	6.50019	6.76643	4.88334	10.3348	8.9487	13.1782	6.75212	10.4247	5.39479	FALSE	FALSE	FALSE	Name=Pfam:Rhodanese; Dbxref=Pfam:PF00581.15; Description=rhodanese-like domain; Ontology_term=InterPro:IPR001763; score=33.70; evalue=3.30e-08;
MMETSP0851-20130426|110615_1	0.0188075	3.85698	3.16197	4.85123	4.23181	4.26058	9.30643	1.40257	4.89741	3.6368	2.41834	0	1.05319	2.02232	1.91917	3.28617	0.272026	5.39111	0.328761	3.73267	0.773833	0.520495	1.26022	4.49341	3.79642	2.26501	0.58208	0.801897	0.174026	FALSE	FALSE	FALSE	FALSE
MMETSP0851-20130426|72490_1	0.0198023	26.1418	38.4935	20.8133	32.0409	28.7589	22.164	30.0149	25.3033	9.17859	29.0201	10.8908	28.0851	29.0479	32.2421	38.0504	29.3788	205.504	547.168	38.8474	48.1324	26.5452	28.1974	27.1851	50.7093	30.6806	37.0203	36.2458	42.6362	FALSE	FALSE	FALSE	FALSE
MMETSP0851-20130426|8957_1	0.0199213	10.1424	8.936	10.7979	10.5795	9.05373	10.8983	12.7633	15.182	12.9886	22.1681	10.6813	9.65426	11.7662	11.1312	16.2579	11.9692	31.9616	38.465	15.8984	4.79776	13.5329	11.4995	11.9075	26.3038	14.6196	6.17004	10.7454	5.56882	FALSE	FALSE	FALSE	FALSE
MMETSP0851-20130426|25982_1	0.0203704	4.71409	14.0226	8.60701	3.92954	6.79029	5.51038	12.4828	0.489741	2.94408	3.22445	2.30382	6.84575	8.45699	57.0633	77.6573	25.0264	116.551	908.367	155.804	21.203	75.9922	14.9651	3.37006	6.23697	6.79503	20.3728	35.1231	28.5402	Pirin C-terminal cupin domain	ko:K06911	Pirin_C	Name=Pfam:Pirin; Dbxref=Pfam:PF02678.11; Description=pirin; Ontology_term=InterPro:IPR003829; score=87.90; evalue=3.20e-25;
MMETSP0851-20130426|111513_1	0.0204246	7.28541	6.04899	5.94666	8.31249	6.39087	5.38793	4.2077	1.63247	6.92724	9.27031	24.2948	9.65426	4.04465	7.80463	4.49686	4.89647	57.3768	38.9034	8.98606	6.80973	7.11343	5.51345	2.69605	0	12.3546	4.65664	4.81138	4.17661	FALSE	FALSE	FALSE	FALSE
MMETSP0851-20130426|59402_1	0.0226768	9.57103	9.89834	9.70245	11.4863	9.05373	12.1228	12.9036	9.14184	6.23452	27.2063	3.76988	11.234	9.19238	18.9358	14.7013	63.3821	55.4514	256.543	26.1287	13.1552	21.5138	16.3828	10.5595	14.101	17.0905	15.3669	10.9058	16.5324	DnaJ molecular chaperone homology domain	-	DnaJ	Name=Pfam:DnaJ; Dbxref=Pfam:PF00226.26; Description=dnaj domain; Ontology_term=InterPro:IPR001623; score=86.00; evalue=9.00e-25;
MMETSP0851-20130426|132911_1	0.0230046	12.5709	20.4841	31.9242	16.4738	17.5749	18.6129	20.1969	22.3649	8.13951	50.1806	16.5456	11.7606	9.92777	348.905	733.507	86.5043	64.9501	506.402	1018.19	32.9653	120.755	48.0458	24.2644	27.3884	20.591	33.6442	241.852	113.987	oxidoreductase activity	-	-	Name=Pfam:Saccharop_dh; Dbxref=Pfam:PF03435.13; Description=saccharopine dehydrogenase; Ontology_term=InterPro:IPR005097; score=50.10; evalue=1.70e-13;
MMETSP0851-20130426|16369_1	0.0255547	220.419	252.683	1757.24	156.728	1921.39	1093.75	1622.07	2360.72	2817.65	2212.38	1073.79	3692.67	4008.25	972.636	1150.16	1701.25	5493.54	1229.57	342.715	131.242	175.754	98.297	419.46	1557.89	440.029	206.522	670.867	189.514	COG NOG14600 non supervised orthologous group	-	-	FALSE
MMETSP0851-20130426|167882_1	0.0255547	13.1423	15.6724	11.5803	12.6954	20.7703	17.6332	21.319	14.0393	19.7426	14.107	15.9173	13.6915	18.3848	19.5755	16.2579	11.6971	116.936	70.4644	70.6443	48.9062	32.9647	38.9092	34.1499	23.8632	17.5023	40.1635	23.7362	46.1168	Triosephosphate isomerase	-	TIM	Name=Pfam:TIM; Dbxref=Pfam:PF00121.13; Description=triosephosphate isomerase; Ontology_term=InterPro:IPR000652; score=269.20; evalue=2.00e-80;
MMETSP0851-20130426|195470_1	0.0255547	36.8556	26.2581	18.6224	22.0659	72.6961	31.7153	25.1059	44.4032	15.7595	46.7546	5.86426	100.053	101.484	26.1007	30.0944	66.9184	169.948	14.6847	27.2347	17.6434	21.3403	14.9651	23.5904	8.9487	31.7101	22.2354	35.7646	16.5324	FALSE	FALSE	FALSE	FALSE
MMETSP0851-20130426|79607_1	0.0255547	6.57115	16.0848	13.7712	8.91703	11.0509	6.85737	6.03103	9.79483	12.1227	8.06114	9.84359	12.8138	16.3624	13.3063	16.9497	2.99229	66.4904	11.8354	44.5156	4.33346	19.6053	14.4925	17.5243	1.08469	7.20685	7.10137	23.5758	13.4	FALSE	FALSE	FALSE	FALSE
MMETSP0851-20130426|53220_1	0.0255547	19.7135	17.4596	18.153	19.1943	17.3086	23.511	12.3426	44.0767	25.4576	8.46419	75.1882	11.5851	3.8608	18.2961	17.1227	2.44824	109.234	10.5204	41.6124	28.3223	15.6148	2.99302	11.9075	24.6767	12.5605	25.8443	15.3964	8.1792	FALSE	FALSE	FALSE	FALSE
MMETSP0851-20130426|141851_1	0.0255547	0.428554	2.33711	0.938947	0.604545	0.932001	0.979624	0.42077	0.816236	2.59771	0.201528	7.33033	1.40426	0.367695	3.7104	0.345912	4.35242	15.2748	15.3422	0.414741	0.4643	1.56148	0.157527	4.04407	3.25407	2.47092	0.465664	0.962277	0.522077	FALSE	FALSE	FALSE	FALSE
MMETSP0851-20130426|119235_1	0.0258932	9.57103	11.1356	8.29403	12.6954	10.1189	11.1432	9.95822	7.34612	7.2736	17.533	3.97932	8.60107	13.7886	13.0504	10.8962	14.4174	98.452	121.422	27.9259	35.2868	13.5329	19.2183	12.5816	14.101	17.7083	22.9339	15.0757	18.7948	FALSE	FALSE	FALSE	FALSE
MMETSP0851-20130426|188917_1	0.0265659	46.1409	36.019	45.2259	41.5624	40.3423	64.5327	25.3864	36.4041	51.9543	23.7804	25.7609	16.5	20.9586	12.4106	10.5503	45.9724	89.7235	78.7931	33.0411	16.56	16.6558	23.7866	19.5463	16.5415	21.2087	15.5997	32.2363	12.8779	Acetyl-CoA hydrolase/transferase N-terminal domain	-	AcetylCoA_hyd_C,AcetylCoA_hydro	Name=Pfam:AcetylCoA_hyd_C; Dbxref=Pfam:PF13336.1; Description=acetyl-coa hydrolase/transferase c-terminal domain; Ontology_term=InterPro:IPR026888; score=179.90; evalue=2.20e-53;
MMETSP0851-20130426|101688_1	0.0265659	13.1423	21.4464	15.6491	18.5897	32.2206	10.1636	17.1113	16.1615	24.0722	13.0993	29.3213	18.0798	13.0532	94.807	251.997	86.5043	1038.43	625.742	180.965	80.0143	245.327	224.004	15.9516	21.1515	18.1201	30.6174	106.652	206.22	Sodium:neurotransmitter symporter family	ko:K05034	SNF	Name=Pfam:SNF; Dbxref=Pfam:PF00209.13; Description=sodium:neurotransmitter symporter family; Ontology_term=InterPro:IPR000175; score=95.50; evalue=2.30e-27;
MMETSP0851-20130426|188938_1	0.0285242	143.994	166.622	1036.91	166.552	1277.77	1251.1	940.841	1345.32	1793.64	2219.84	786.44	1997.55	2124.73	710.349	1303.4	1898.47	3244.42	1689.28	252.854	93.9433	389.504	137.206	228.041	1188.01	245.651	221.54	250.192	208.657	FALSE	FALSE	FALSE	FALSE
MMETSP0851-20130426|170138_1	0.0312841	13.7137	19.7967	10.4849	19.7988	9.85258	17.1434	12.3426	18.6102	12.8154	2.8214	4.18876	12.6383	13.237	13.3063	11.761	7.34471	10.3971	5.15059	56.6813	10.3694	6.59293	7.24625	13.4802	10.0334	13.5901	12.4565	14.2738	9.22335	-	-	-	FALSE
MMETSP0851-20130426|75153_1	0.0325596	16.7136	9.48591	15.0232	17.9852	9.98573	16.7761	10.7998	10.2846	4.84907	19.9513	9.00583	2.45745	16.5463	11.7709	20.9277	31.8271	77.1442	193.75	29.7231	13.6195	22.0343	14.4925	14.1542	5.15228	10.7073	7.91628	31.4344	10.7896	FALSE	FALSE	FALSE	FALSE
MMETSP0851-20130426|131586_1	0.0343268	2.14277	3.71188	12.2063	3.02272	22.7675	15.5515	22.8618	24.9768	51.2616	22.1681	15.0795	28.7872	32.7249	8.5723	28.1919	23.1222	37.8661	42.191	9.53905	2.3215	5.55194	1.26022	11.2335	28.7443	10.0896	2.67757	5.13214	9.74543	FALSE	FALSE	FALSE	FALSE
MMETSP0851-20130426|93926_1	0.0343268	18.5707	16.9097	35.2105	11.7886	83.4807	48.6138	56.6637	60.2382	91.4396	151.146	132.784	88.2926	85.8568	37.104	50.3303	70.7268	115.139	48.7662	17.6956	10.8337	13.3594	10.7118	12.1322	57.2174	23.8855	21.0713	27.1041	15.6623	FALSE	FALSE	FALSE	FALSE
MMETSP0851-20130426|106210_1	0.0359116	3.71413	5.63655	2.50386	2.72045	2.66286	2.57151	3.64667	1.79572	5.36861	6.24738	2.30382	1.40426	4.78004	1.53534	2.94026	0.816078	0.25672	0	0.691235	1.08337	53.958	0.787636	3.8194	15.1857	6.58912	0.931327	2.24531	13.2259	FALSE	FALSE	FALSE	FALSE
MMETSP0851-20130426|185240_1	0.0363093	14.9994	21.4464	18.466	19.95	11.7166	18.123	14.7269	5.8769	18.0108	21.362	9.84359	6.84575	15.0755	22.7742	78.0033	24.7544	12.5793	51.5059	275.803	9.13122	23.5958	28.985	6.51545	9.76222	14.6196	10.5938	52.2837	25.5817	FALSE	FALSE	FALSE	FALSE
MMETSP0851-20130426|190850_1	0.0373084	46.8552	54.9908	50.5466	57.4317	49.5292	60.3693	49.5106	46.5254	41.2171	103.586	71.4184	63.016	74.4583	82.5243	75.5819	83.512	100.121	66.3001	123.178	58.0374	55.8664	76.0856	53.2469	70.2337	60.3316	53.5513	77.9444	60.5609	-	-	-	FALSE
MMETSP0851-20130426|189112_1	0.0386069	150.137	192.88	514.073	126.803	749.995	178.781	473.506	673.884	612.714	942.75	271.851	775.851	1446.15	104.275	203.224	418.648	1234.56	152.436	121.104	72.5855	22.5548	44.1076	86.9475	256.258	109.544	73.9241	185.88	87.8829	-	-	-	FALSE
MMETSP0851-20130426|65505_1	0.0390973	35.8556	35.8815	33.1761	25.8443	37.6795	20.817	30.0149	28.7315	16.4522	26.1987	23.0382	27.9096	25.1871	53.353	72.9875	59.8458	90.622	46.6841	97.326	25.3817	65.9293	19.2183	21.5684	8.67753	25.3269	29.2204	58.8593	47.1609	FALSE	FALSE	FALSE	Name=Pfam:Dak2; Dbxref=Pfam:PF02734.12; Description=dak2 domain; Ontology_term=InterPro:IPR004007; score=53.80; evalue=1.60e-14;
MMETSP0851-20130426|101134_1	0.0400085	11.4281	11.9605	10.0154	12.9977	7.32287	12.8576	7.57385	11.1008	7.2736	4.83668	19.6872	5.26596	20.0394	47.7234	26.1164	26.3865	211.665	78.9026	173.777	16.4053	39.2106	20.7936	16.8503	0.542345	13.796	12.5729	35.2835	105.285	sequence-specific DNA binding	ko:K09419	HSF_DNA-bind	Name=Pfam:HSF_DNA-bind; Dbxref=Pfam:PF00447.12; Description=hsf-type dna-binding; Ontology_term=InterPro:IPR000232; score=48.30; evalue=7.90e-13;
MMETSP0851-20130426|113568_1	0.0402063	9.57103	10.8607	3.5993	7.85908	8.52115	9.79624	7.99462	16.8145	3.29044	6.44891	11.938	23.1702	2.57387	49.0028	28.8837	6.2566	28.4959	5.47935	66.4969	3.2501	11.4509	18.2732	8.98683	21.1515	15.8551	5.1223	12.8304	16.3584	-	-	-	FALSE
MMETSP0851-20130426|189148_1	0.0408999	11.4281	18.9718	13.1453	15.1136	17.1755	9.18397	16.8308	10.2846	16.6254	14.7116	18.2211	12.1117	36.218	14.2019	5.88051	8.97686	53.6544	123.614	18.9399	12.8456	11.4509	11.8145	12.3569	38.7777	16.061	12.8058	13.3115	8.8753	FALSE	FALSE	FALSE	FALSE
MMETSP0851-20130426|195251_1	0.0408999	16.1422	30.6574	21.1263	20.1011	22.7675	14.2045	24.6852	23.9973	12.469	39.0965	24.9231	24.3989	23.9002	22.2624	58.6322	48.1486	36.0691	15.9997	54.3311	16.7148	19.0848	15.4377	18.8723	9.49104	20.7969	18.3937	21.4908	26.2779	FALSE	FALSE	FALSE	FALSE
MMETSP0851-20130426|193642_1	0.0410635	23.7133	20.4841	21.7523	23.7284	18.2406	17.1434	20.1969	18.2837	29.7871	17.7345	38.5366	18.4309	12.5016	13.3063	18.8522	27.7467	63.0247	21.6982	51.8427	20.8935	23.5958	26.9372	21.3437	11.3893	21.2087	29.8025	24.5381	26.974	FALSE	FALSE	FALSE	FALSE
MMETSP0851-20130426|192060_1	0.0410635	12.5709	7.28628	13.4582	12.0909	32.62	18.9802	41.6562	22.0384	19.3963	43.7317	308.921	30.016	137.886	57.959	88.0347	38.3557	1298.1	430.896	536.122	220.697	210.106	245.427	113.009	39.0489	173.582	129.571	132.473	233.194	FALSE	FALSE	FALSE	FALSE
MMETSP0851-20130426|113428_1	0.0413158	12.5709	16.9097	18.466	16.625	25.9629	12.0004	16.41	27.2623	13.6813	14.9131	38.5366	14.9202	35.1149	11.515	29.4026	48.4207	7.44487	49.2046	10.092	39.775	20.4728	51.6689	21.3437	16.2704	31.7101	29.6861	24.6984	31.8467	Endoribonuclease XendoU	ko:K14648	XendoU	Name=Pfam:XendoU; Dbxref=Pfam:PF09412.5; Description=endoribonuclease xendou; Ontology_term=InterPro:IPR018998; score=302.20; evalue=2.10e-90;
MMETSP0851-20130426|8536_1	0.0414881	11.7138	13.3353	6.41614	13.1488	16.6429	11.1432	11.3608	3.59144	3.29044	8.26266	22.4099	10.883	16.914	22.1344	60.1888	28.2907	394.706	183.12	95.114	69.9545	88.1371	87.9002	14.3789	3.79642	9.47186	56.9274	54.2083	90.6673	FALSE	FALSE	FALSE	Name=Pfam:Glyco_hydro_8; Dbxref=Pfam:PF01270.12; Description=glycosyl hydrolases family 8; Ontology_term=InterPro:IPR002037; score=25.90; evalue=3.20e-06;
MMETSP0851-20130426|37999_1	0.0428275	2.99987	2.88702	1.56491	4.23181	0.532572	0.489812	3.08564	5.71365	0.692724	7.25502	2.93213	0.351064	0.919238	0.255889	1.38365	31.8271	0	0.328761	0.138247	0.309533	11.6244	32.2931	1.57269	5.15228	3.91229	0.814911	1.12266	1.74026	FALSE	FALSE	FALSE	FALSE
MMETSP0851-20130426|188523_1	0.0447815	0.999958	2.06215	7.51158	2.87159	4.12743	5.63284	0.701283	1.14273	7.10042	4.03057	0	0.526596	2.20617	2.17506	3.45912	5.71255	2.95228	50.41	5.94463	17.3338	21.6873	102.865	2.47138	1.35586	3.70638	61.2348	5.29252	44.8986	FALSE	FALSE	FALSE	FALSE
MMETSP0851-20130426|192731_1	0.0448223	53.9977	68.8759	51.3291	60.6056	55.9201	54.3691	68.5855	49.6271	31.3458	34.0583	37.6988	49.5	132.37	37.6157	53.2705	36.1795	85.616	23.7804	86.5427	50.9182	54.652	42.2173	68.2999	43.1165	36.652	51.4558	57.0951	48.5531	FALSE	FALSE	FALSE	Name=Pfam:Metallophos; Dbxref=Pfam:PF00149.23; Description=calcineurin-like phosphoesterase; Ontology_term=InterPro:IPR004843; score=47.10; evalue=1.60e-12;
MMETSP0851-20130426|102862_1	0.0464541	26.5703	26.9455	22.8477	23.8795	17.0423	31.348	28.7526	27.4255	12.469	13.0993	18.64	16.8511	32.9087	14.7136	19.3711	46.7885	4.74931	16.986	12.1657	17.1791	32.0972	62.0657	17.9737	22.2362	15.2373	21.4205	23.4154	19.3168	FALSE	FALSE	FALSE	Name=Pfam:Caps_synth; Dbxref=Pfam:PF05704.7; Description=capsular polysaccharide synthesis protein; Ontology_term=InterPro:IPR008441; score=33.50; evalue=2.00e-08;
MMETSP0851-20130426|53442_1	0.0465224	15.5708	20.2091	11.7368	17.6829	13.8469	17.3883	18.0931	15.5085	7.61996	15.3162	12.9852	22.9947	30.8864	20.0873	29.0566	15.7775	77.786	53.8072	107.971	51.0729	19.0848	21.8963	16.401	25.7614	18.7378	48.429	21.0097	41.07	-	-	-	FALSE
MMETSP0851-20130426|193474_1	0.0465224	16.1422	26.9455	23.1607	21.0079	18.9063	12.0004	23.7034	13.223	11.0836	37.6858	27.4364	24.9255	15.627	19.8314	34.9372	21.4901	86.8996	36.6021	49.3542	32.6557	26.8922	20.9511	21.3437	21.965	30.6806	17.346	36.5665	40.3739	Immune inhibitor A peptidase M6	-	Peptidase_M6,SdrD_B	Name=Pfam:Peptidase_M6; Dbxref=Pfam:PF05547.6; Description=immune inhibitor a peptidase m6; Ontology_term=InterPro:IPR008757; score=61.90; evalue=2.80e-17;
MMETSP0851-20130426|51932_1	0.0465224	23.7133	47.842	39.2793	34.7613	50.1949	18.4904	31.4175	23.8341	46.7589	63.2799	53.4067	38.9681	46.1458	62.437	68.1448	83.512	568.634	543.661	150.828	91.0027	310.388	54.977	60.4364	27.3884	48.8006	72.0615	84.6804	99.5426	Peptidase M66	-	CBM_5_12,DUF5011,Peptidase_M66	Name=Pfam:Peptidase_M66; Dbxref=Pfam:PF10462.4; Description=peptidase m66; Ontology_term=InterPro:IPR019503; score=304.80; evalue=4.20e-91;
MMETSP0851-20130426|64190_1	0.0465224	5.99975	12.098	6.41614	8.7659	5.99144	5.02057	12.4828	9.14184	0	13.0993	9.42471	4.56383	0	37.6157	21.4466	37.2676	86.8996	19.1777	28.2024	8.82169	5.20495	9.60916	13.9296	1.08469	9.47186	5.58796	14.5945	16.7064	FALSE	FALSE	FALSE	FALSE
MMETSP0851-20130426|195511_1	0.0476795	13.5709	16.0848	9.54596	16.9273	6.52401	19.7149	10.94	9.95807	4.67589	8.06114	6.0737	9.47873	0.551543	12.4106	8.12894	7.88876	33.5019	28.2734	17.8339	9.44076	8.84841	3.62313	10.7842	11.1181	10.7073	13.8535	12.0285	7.83115	FALSE	FALSE	FALSE	Name=Pfam:START; Dbxref=Pfam:PF01852.14; Description=start domain; Ontology_term=InterPro:IPR002913; score=25.80; evalue=4.90e-06;
MMETSP0851-20130426|7184_1	0.0478512	19.1421	27.4954	27.073	27.8091	27.028	19.2251	34.2226	35.2614	21.1281	36.8797	17.3834	29.8404	30.7026	67.6828	189.387	83.512	41.3319	171.942	418.612	26.3103	44.9361	46.6281	39.542	48.2687	18.9437	23.6324	135.36	49.5973	FALSE	FALSE	FALSE	Name=Pfam:IU_nuc_hydro; Dbxref=Pfam:PF01156.14; Description=inosine-uridine preferring nucleoside hydrolase; Ontology_term=InterPro:IPR001910; score=91.10; evalue=6.70e-26;
MMETSP0851-20130426|74878_1	0.0502562	683.114	852.907	1715.3	635.981	1799.29	816.761	1063.14	1619.25	1491.43	2635.79	617.633	1904	3016.57	710.349	1817.42	2498.29	2907.35	1481.51	286.033	174.112	291.304	233.14	232.309	843.618	350.87	284.986	527.007	216.488	-	-	-	FALSE
MMETSP0851-20130426|9926_1	0.0502562	6.57115	7.97366	3.91228	5.4409	15.9772	6.36755	5.32975	13.3863	1.73181	8.46419	3.97932	17.3777	6.43467	14.4578	14.1824	10.065	93.4459	16.1093	57.9255	9.28599	32.6177	20.006	2.69605	17.8974	10.0896	11.2923	16.1983	22.2753	dihydrolipoyl dehydrogenase activity	-	Pyr_redox_2,Pyr_redox_dim	Name=Pfam:Pyr_redox_dim; Dbxref=Pfam:PF02852.17; Description=pyridine nucleotide-disulphide oxidoreductase dimerisation domain; Ontology_term=InterPro:IPR004099; score=85.70; evalue=1.80e-24;
MMETSP0851-20130426|131462_1	0.0502562	17.8564	17.872	17.214	18.5897	16.3766	14.4495	21.0385	10.1213	16.4522	8.06114	16.3362	12.2872	11.9501	59.2384	86.824	76.7114	205.376	484.155	233.361	90.0741	19.7788	75.4555	22.0177	43.3876	23.4737	100.467	50.5195	80.3998	Major Facilitator	-	MFS_1	Name=Pfam:MFS_1; Dbxref=Pfam:PF07690.11; Description=major facilitator superfamily; Ontology_term=InterPro:IPR011701; score=54.40; evalue=7.20e-15;
MMETSP0851-20130426|92077_1	0.0502562	9.99958	26.2581	8.76351	11.9398	10.252	11.633	9.95822	20.5691	18.184	21.1605	9.63415	5.79255	29.5995	14.8416	19.3711	26.3865	56.8634	8.87655	26.2669	12.2266	20.4728	7.87636	22.2424	11.9316	10.9132	15.2505	22.7739	18.9688	FALSE	FALSE	FALSE	Name=Pfam:Fasciclin; Dbxref=Pfam:PF02469.17; Description=fasciclin domain; Ontology_term=InterPro:IPR000782; score=49.30; evalue=4.10e-13;
MMETSP0851-20130426|192085_1	0.0502562	46.5695	48.5294	44.1305	48.6658	47.3989	55.4712	49.3703	39.5058	27.709	20.3544	11.3097	18.0798	36.4018	29.4273	33.3806	38.6277	17.4569	19.0681	22.949	38.6916	43.3746	31.663	31.6786	40.1336	37.4756	44.9365	40.0949	47.683	FALSE	FALSE	FALSE	Name=Pfam:Fea1; Dbxref=Pfam:PF07692.6; Description=low iron-inducible periplasmic protein; Ontology_term=InterPro:IPR011643; score=110.00; evalue=9.50e-32;
MMETSP0851-20130426|172403_1	0.0511637	3.57128	7.28628	0.938947	2.56931	4.12743	3.67359	6.31155	4.24443	11.9495	2.61987	10.8908	6.84575	2.57387	8.95613	9.68555	19.5859	0.641799	2.19174	2.48845	2.01196	16.8293	10.8694	14.8283	11.9316	14.2078	12.1073	11.0662	5.56882	Haloacid dehalogenase-like hydrolase	ko:K19269	Hydrolase_6,Hydrolase_like	FALSE
MMETSP0851-20130426|81640_1	0.0511637	3.57128	8.936	11.5803	5.89431	4.52686	6.85737	5.75052	5.06066	5.02225	2.8214	6.91145	2.28192	0.367695	3.45451	5.36164	4.89647	44.0274	28.8214	22.2578	14.3933	6.93993	11.657	6.51545	8.40635	9.67777	8.0327	11.5473	13.922	FALSE	FALSE	FALSE	FALSE
MMETSP0851-20130426|13859_1	0.0511637	7.99967	5.63655	6.41614	9.21931	9.18687	5.51038	7.99462	4.57092	1.21227	6.04585	4.81707	6.84575	11.5824	10.1076	6.22642	4.62444	0.25672	2.63009	1.24422	1.3929	5.55194	6.45862	5.3921	4.33876	4.53002	6.05363	3.36797	4.69869	FALSE	FALSE	FALSE	FALSE
MMETSP0851-20130426|153032_1	0.0512226	14.9994	13.7477	13.7712	13.4511	9.5863	24.2457	19.2151	8.81534	9.17859	14.7116	10.2625	14.2181	9.00853	19.1917	25.4246	18.2258	37.8661	62.9029	12.4422	8.51216	16.8293	10.7118	13.0309	11.9316	17.7083	8.96403	8.17935	4.87271	FALSE	FALSE	FALSE	Name=Pfam:PAP2; Dbxref=Pfam:PF01569.16; Description=pap2 superfamily; Ontology_term=InterPro:IPR000326; score=57.00; evalue=1.40e-15;
MMETSP0851-20130426|1331_1	0.0513849	45.9981	36.019	35.2105	49.7238	93.067	75.431	46.9859	27.4255	20.9549	28.0124	11.3097	35.8085	40.8142	41.71	29.5755	19.8579	132.852	225.092	61.52	45.0371	32.6177	19.8484	21.7931	14.3722	28.6215	48.1962	24.2173	53.7739	FALSE	FALSE	FALSE	Name=Pfam:KR; Dbxref=Pfam:PF08659.5; Description=kr domain; Ontology_term=InterPro:IPR013968; score=43.00; evalue=3.40e-11;
MMETSP0851-20130426|168823_1	0.0513849	9.42818	7.42375	3.28631	6.80113	5.19258	3.30623	30.0149	6.69313	6.23452	2.01528	4.81707	7.54787	6.06697	4.47807	11.5881	15.2335	0.12836	13.4792	1.65897	2.3215	6.93993	34.0259	42.2381	21.4226	7.00094	14.6684	4.16987	2.26233	FALSE	FALSE	FALSE	FALSE
MMETSP0851-20130426|189483_1	0.0524397	27.1417	42.3429	32.5502	35.0636	44.4698	26.5723	43.3393	31.017	23.5526	39.9026	29.9496	19.8351	41.1819	40.6864	73.5064	41.62	182.399	130.299	172.947	84.193	88.3106	107.276	36.846	27.9308	33.7692	66.4735	51.6422	103.023	AAA domain (dynein-related subfamily)	-	AAA	Name=Pfam:AAA; Dbxref=Pfam:PF00004.24; Description=atpase family associated with various cellular activities (aaa); Ontology_term=InterPro:IPR003959; score=77.90; evalue=6.80e-22;
MMETSP0851-20130426|148624_1	0.0533008	2.14277	2.33711	3.91228	2.11591	1.864	0.489812	0.841539	130.108	3.46362	76.9838	0.209438	3.51064	13.0532	4.35012	9.68555	431.433	0	0.438348	0.276494	0.928599	103.058	73.4077	0.449341	69.4202	1.64728	1.04774	1.60379	0	FALSE	FALSE	FALSE	FALSE
MMETSP0851-20130426|179821_1	0.0533008	5.28549	4.26179	7.35508	8.91703	5.19258	8.20435	1.26231	7.67262	7.44678	4.2321	5.02651	11.5851	5.69928	3.7104	5.01573	7.34471	0	0.109587	0.691235	3.2501	3.64346	2.99302	3.37006	2.44055	2.0591	5.1223	4.16987	2.95843	FALSE	FALSE	FALSE	FALSE
MMETSP0851-20130426|192555_1	0.0537791	10.9995	17.0471	12.2063	13.7534	10.9177	13.1025	17.9528	13.5495	17.6645	9.27031	13.1946	9.12766	11.5824	13.1783	14.0095	14.1454	20.5376	14.5751	34.9765	14.8576	11.9714	12.1296	14.3789	10.0334	16.6787	14.0863	18.4436	9.5714	Coproporphyrinogen III oxidase	ko:K00228	Coprogen_oxidas	Name=Pfam:Coprogen_oxidas; Dbxref=Pfam:PF01218.13; Description=coproporphyrinogen iii oxidase; Ontology_term=InterPro:IPR001260; score=295.80; evalue=1.70e-88;
MMETSP0851-20130426|774_1	0.0547083	346.414	259.419	678.702	228.518	1074.2	466.423	539.006	1181.75	1840.57	1049.76	424.112	1446.73	1630.73	150.719	275.692	538.34	1582.68	424.43	158.431	73.0498	49.447	75.4555	190.97	1207.8	133.43	119.908	285.957	84.2283	-	-	-	FALSE
MMETSP0851-20130426|160473_1	0.0547083	3.99983	7.28628	6.41614	3.02272	7.05658	2.20415	3.2259	6.85638	0.519543	0.403057	2.72269	5.96809	6.80236	2.17506	7.43712	0.272026	8.85683	1.6438	4.42391	1.8572	1.38799	0.630109	3.8194	5.42345	4.53002	1.86265	0.962277	1.3922	FALSE	FALSE	FALSE	FALSE
MMETSP0851-20130426|173130_1	0.0560812	8.99962	8.936	7.98105	6.80113	5.85829	5.02057	5.61026	4.57092	2.25135	5.84432	5.86426	1.40426	11.5824	3.19862	6.74529	1.90418	0.25672	0.767109	2.21195	7.27403	11.7979	6.30109	6.29078	1.35586	5.35366	5.70438	3.04721	7.13505	FALSE	FALSE	FALSE	FALSE
MMETSP0851-20130426|129832_1	0.0561791	10.7138	6.32394	12.3628	9.37044	4.79315	3.42868	6.03103	3.42819	11.7763	3.62751	8.58696	10.7074	7.17006	5.11779	6.74529	11.4251	12.1942	17.7531	6.22112	1.70243	3.46997	0.787636	11.2335	14.101	9.47186	4.07456	4.00949	2.95843	FALSE	FALSE	FALSE	FALSE
MMETSP0851-20130426|134952_1	0.0567365	4.14268	11.823	5.94666	4.68522	6.12458	6.61246	10.379	8.97859	2.94408	35.0659	9.63415	7.02128	11.0309	4.47807	2.59434	1.90418	22.9764	26.9584	10.2303	3.55963	6.93993	0.315054	4.49341	0.542345	3.08865	3.25965	4.81138	4.17661	FALSE	FALSE	FALSE	FALSE
MMETSP0851-20130426|142420_1	0.0567365	0.285702	0.687385	2.50386	1.81363	1.33143	1.59189	2.10385	3.1017	0	0.201528	0.837752	0	0	0.767668	2.07547	0	13.6061	16.986	7.46534	1.08337	1.90848	0.157527	1.79737	0	0.41182	0.58208	0	1.04415	FALSE	FALSE	FALSE	FALSE
MMETSP0851-20130426|116320_1	0.0567365	0.999958	2.74954	0.312982	1.36023	0.798858	3.18378	1.12205	3.26494	3.46362	2.8214	13.6135	4.03724	2.02232	1.91917	1.21069	0	0	2.19174	0.138247	2.94056	4.33746	8.03389	2.92072	15.728	5.35366	2.09549	5.13214	2.78441	FALSE	FALSE	FALSE	FALSE
MMETSP0851-20130426|167663_1	0.0619562	15.1422	31.0698	16.5881	20.8568	15.4446	16.0413	20.8982	15.6717	29.9603	25.3926	18.0117	48.6224	34.931	17.2725	23.695	5.1685	66.7471	6.57522	17.4191	17.0243	22.7283	10.0817	37.0707	21.965	26.7683	18.743	13.7926	16.5324	FALSE	FALSE	FALSE	FALSE
MMETSP0851-20130426|35704_1	0.0620567	4.99979	4.12431	7.98105	7.55681	5.72515	15.7964	14.7269	12.8965	3.46362	0.604585	10.6813	11.4096	1.10309	8.82819	11.0692	6.52863	20.1525	9.42448	10.2303	1.54767	6.93993	4.72582	11.4582	8.40635	8.2364	1.16416	4.49063	7.30907	FALSE	FALSE	FALSE	FALSE
MMETSP0851-20130426|193046_1	0.0636532	87.4249	76.7121	82.6273	89.926	234.199	81.921	94.5329	135.495	107.026	102.981	349.971	151.66	567.538	674.908	1018.37	1387.61	2246.55	3640.15	398.29	462.288	234.743	485.814	141.318	72.9455	120.045	509.087	501.507	586.292	FALSE	FALSE	FALSE	FALSE
MMETSP0851-20130426|2568_1	0.0651045	98.2816	77.6745	71.9859	100.203	46.8663	93.6765	69.2867	53.2186	51.0884	44.3362	55.5011	74.0745	58.4635	65.1239	65.7234	26.9306	121.557	8.10944	38.2944	35.7511	58.2954	22.5264	72.7933	30.3713	50.242	28.2891	46.8308	28.5402	FALSE	FALSE	FALSE	Name=Pfam:Bac_globin; Dbxref=Pfam:PF01152.16; Description=bacterial-like globin; Ontology_term=InterPro:IPR001486; score=55.10; evalue=6.30e-15;
MMETSP0851-20130426|126206_1	0.067555	6.1426	10.3108	16.901	9.21931	7.58915	8.93907	11.6413	13.223	7.79314	12.8978	14.4512	7.37234	16.1786	9.7238	15.0472	6.2566	28.881	27.7255	16.4514	7.42879	11.7979	6.9312	6.29078	8.40635	11.7369	10.9431	8.50011	10.4415	FALSE	FALSE	FALSE	FALSE
MMETSP0851-20130426|106766_1	0.0677705	2.14277	3.5744	3.91228	2.56931	4.66001	2.81642	2.94539	2.93845	9.35177	1.20917	1.88494	3.33511	1.47078	2.55889	2.07547	0.272026	3.97915	0.109587	6.77411	0.154767	1.56148	0	1.57269	4.88111	3.91229	2.09549	0.320759	0.870128	FALSE	FALSE	FALSE	FALSE
MMETSP0851-20130426|153709_1	0.0677705	8.14252	9.76086	8.92	13.9045	18.64	6.49001	9.11668	4.73417	16.7986	11.6886	7.53977	6.31915	5.69928	148.8	492.752	115.339	204.477	520.977	804.46	69.0259	98.894	96.8792	4.04407	21.1515	15.0314	75.2047	312.74	106.504	FALSE	FALSE	FALSE	FALSE
MMETSP0851-20130426|118356_1	0.0677705	23.999	23.0961	28.9509	24.9375	28.7589	18.9802	22.3008	26.6093	33.9435	37.8873	39.5838	22.6436	26.4741	49.5146	66.0693	55.7654	170.077	97.642	170.459	56.1802	63.8474	72.62	33.7006	5.42345	31.0924	47.2649	94.9446	78.6595	FALSE	FALSE	FALSE	Name=Pfam:Beta_propel; Dbxref=Pfam:PF09826.4; Description=beta propeller domain; Ontology_term=InterPro:IPR019198; score=241.20; evalue=1.40e-71;
MMETSP0851-20130426|51843_1	0.0722478	7.85682	7.1488	5.16421	5.4409	5.05944	7.71454	5.18949	2.12221	4.15634	1.61223	1.04719	1.57979	4.59619	2.17506	6.91825	0	15.0181	2.19174	8.98606	2.3215	4.85795	1.41774	0.449341	5.9658	3.70638	1.86265	5.13214	4.17661	FALSE	FALSE	FALSE	Name=Pfam:IMCp; Dbxref=Pfam:PF12314.3; Description=inner membrane complex protein; Ontology_term=InterPro:IPR022086; score=31.10; evalue=1.80e-07;
MMETSP0851-20130426|113629_1	0.0722478	0.714256	1.09982	0.156491	1.51136	0.665715	0.612265	1.40257	3.59144	3.11726	2.01528	2.72269	2.80851	1.83848	4.35012	1.72956	4.62444	7.82995	14.3559	8.57132	3.86916	1.73498	0.630109	2.92072	2.16938	3.91229	2.32832	1.12266	0.522077	FALSE	FALSE	FALSE	FALSE
MMETSP0851-20130426|193529_1	0.0729717	58.7118	57.3279	49.4512	47.6079	56.8521	70.1656	57.926	36.4041	53.3397	54.0096	34.1384	38.0904	45.5942	49.6426	42.7202	42.9801	69.1859	107.176	55.8518	34.5129	50.835	29.6151	40.216	49.6246	46.5356	27.707	38.9722	41.244	FALSE	FALSE	FALSE	Name=Pfam:FAD_binding_1; Dbxref=Pfam:PF00667.15; Description=fad binding domain; Ontology_term=InterPro:IPR003097; score=69.10; evalue=3.10e-19;
MMETSP0851-20130426|195120_1	0.0736559	22.5705	21.8588	19.0919	26.2977	23.4332	31.2255	22.7216	22.0384	11.0836	24.9895	18.8494	11.9362	16.1786	21.4947	19.89	23.1222	50.317	27.5063	41.7506	31.5724	24.1163	21.8963	16.8503	21.965	18.1201	25.2623	21.1701	14.0961	FALSE	FALSE	FALSE	FALSE
MMETSP0851-20130426|105063_1	0.073689	8.71392	12.3729	8.29403	6.95226	7.58915	14.327	8.55565	14.0393	8.13951	6.04585	0	2.63298	9.92777	10.4915	10.5503	0.272026	17.9704	6.68481	11.0598	4.48823	7.80742	2.83549	6.06611	10.0334	7.61867	5.00588	3.84911	7.13505	Catalyzes the transfer of a two-carbon ketol group from a ketose donor to an aldose acceptor, via a covalent intermediate with the cofactor thiamine pyrophosphate	ko:K00615	Transket_pyr,Transketolase_C,Transketolase_N	Name=Pfam:Transketolase_N; Dbxref=Pfam:PF00456.16; Description=transketolase thiamine diphosphate binding domain; Ontology_term=InterPro:IPR005474; score=90.30; evalue=9.20e-26;
MMETSP0851-20130426|176209_1	0.073689	6.57115	6.32394	7.19859	3.7784	1.59772	3.67359	5.32975	3.1017	7.44678	10.2779	1.46607	2.10638	5.14773	1.02356	5.88051	4.08039	0.641799	0	1.10598	2.63103	10.0629	9.60916	2.02204	4.60994	4.94184	2.79398	6.89632	5.39479	Belongs to the peptidase C1 family	ko:K01363	Peptidase_C1,Propeptide_C1	Name=Pfam:Peptidase_C1; Dbxref=Pfam:PF00112.18; Description=papain family cysteine protease; Ontology_term=InterPro:IPR000668; score=76.80; evalue=1.90e-21;
MMETSP0851-20130426|14088_1	0.073689	30.1416	29.695	20.9698	25.0886	26.6286	18.2455	21.319	22.5281	14.7204	110.639	13.404	28.4362	17.0978	25.2051	29.7485	65.5583	43.6423	81.0944	26.2669	19.9649	24.9838	12.2871	19.097	14.9145	19.3555	16.0654	21.6512	18.9688	FALSE	FALSE	FALSE	FALSE
MMETSP0851-20130426|85569_1	0.0745194	94.8532	94.1717	78.5586	82.5203	83.2144	79.472	68.4452	77.2159	75.3337	41.3133	61.1559	57.9255	94.13	84.6994	73.3334	322.079	21.6928	33.6432	42.4419	52.4658	92.8216	95.1464	70.0972	84.6059	81.7462	62.1661	61.1046	53.5999	FALSE	FALSE	FALSE	FALSE
MMETSP0851-20130426|187832_1	0.0807809	3.71413	7.01132	13.1453	4.38295	3.86115	3.9185	6.17129	6.20339	1.03909	7.65808	1.6755	5.09043	3.8608	1.79123	3.45912	13.3293	0.12836	0.438348	1.65897	2.7858	14.0534	9.2941	7.6388	3.25407	3.08865	4.19097	4.97176	3.82856	FALSE	FALSE	FALSE	Name=Pfam:PDZ; Dbxref=Pfam:PF00595.19; Description=pdz domain (also known as dhr or glgf); Ontology_term=InterPro:IPR001478; score=29.30; evalue=6.30e-07;
MMETSP0851-20130426|105686_1	0.082453	17.1421	12.9228	13.4582	20.8568	11.8497	7.83699	10.2387	6.85638	3.11726	3.82904	11.1002	10.5319	7.90545	18.0402	8.99372	11.1531	0.898519	5.36976	6.22112	10.9884	13.1859	10.0817	7.18946	11.3893	11.7369	7.68345	32.2363	10.7896	FALSE	FALSE	FALSE	FALSE
MMETSP0851-20130426|5145_1	0.0835782	5.5712	8.38609	4.53824	5.28977	3.728	10.7759	9.25693	4.73417	8.13951	13.9055	6.0737	5.44149	11.0309	6.78107	7.78303	90.0407	30.5496	35.287	13.8247	8.04786	7.63392	9.45163	3.59473	5.15228	10.0896	7.10137	6.57556	10.7896	FALSE	FALSE	FALSE	FALSE
MMETSP0851-20130426|137091_1	0.08362	3.99983	7.28628	4.85123	5.74317	13.98	4.40831	5.18949	9.14184	1.90499	3.82904	9.63415	7.02128	3.67695	3.7104	6.05347	0.272026	0.513439	2.95885	1.10598	3.55963	3.99046	2.83549	8.53748	11.1181	7.41276	4.54022	11.8681	3.82856	Regulated-SNARE-like domain	ko:K08517	Longin,Synaptobrevin	Name=Pfam:Longin; Dbxref=Pfam:PF13774.1; Description=regulated-snare-like domain; Ontology_term=InterPro:IPR010908; score=39.20; evalue=3.40e-10;
MMETSP0851-20130426|8747_1	0.08362	15.7136	17.0471	7.51158	16.625	14.5126	11.8779	18.2334	26.9358	21.1281	10.0764	19.2683	14.2181	24.8194	41.4541	15.0472	17.9537	122.199	10.9587	19.0781	10.5241	54.305	14.1774	12.8062	53.1498	30.0628	13.155	23.8965	15.1402	FALSE	FALSE	FALSE	FALSE
MMETSP0851-20130426|188486_1	0.0840017	4.57124	6.73637	10.1719	6.80113	5.32572	8.0819	8.69591	9.14184	5.19543	8.46419	2.93213	3.51064	9.56008	6.26929	8.12894	42.9801	1.41196	2.63009	1.79721	2.3215	18.5643	21.7388	2.92072	9.76222	5.14775	2.67757	6.89632	8.1792	FALSE	FALSE	FALSE	FALSE
MMETSP0851-20130426|173846_1	0.0847144	21.9991	24.0585	22.2217	22.8216	20.1046	15.674	23.7034	20.4059	35.8485	7.85961	17.3834	24.0479	12.3178	21.8785	25.4246	10.337	26.9556	9.64366	42.5801	7.42879	15.4413	12.4446	27.1851	24.4055	21.0028	8.26553	27.4249	21.4051	FALSE	FALSE	FALSE	Name=Pfam:PAN_1; Dbxref=Pfam:PF00024.21; Description=pan domain; Ontology_term=InterPro:IPR003014; score=42.80; evalue=2.70e-11;
MMETSP0851-20130426|3394_1	0.0847144	13.9994	12.7854	10.3284	10.8818	35.6823	12.6127	11.3608	10.1213	21.8208	27.8109	10.6813	10.1809	23.1648	320.502	412.674	147.71	989.782	941.571	1170.95	272.699	431.837	503.299	12.8062	7.32166	10.2955	430.157	534.384	533.388	FALSE	FALSE	FALSE	FALSE
MMETSP0851-20130426|190287_1	0.0866349	20.5706	25.2958	28.7944	21.6125	39.8098	43.9606	22.8618	31.9964	21.994	27.2063	16.9645	31.5958	34.3795	25.3331	23.3491	62.838	92.1623	13.6984	38.4327	15.0124	36.9551	25.0468	31.4539	52.0652	35.2106	18.6265	54.8498	22.6233	FALSE	FALSE	FALSE	Name=Pfam:PT; Dbxref=Pfam:PF04886.7; Description=pt repeat; Ontology_term=InterPro:IPR006970; score=57.80; evalue=4.30e-16;
MMETSP0851-20130426|101776_1	0.0866349	6.57115	6.32394	4.38175	4.38295	2.66286	5.51038	5.04924	6.36664	7.2736	0.806114	5.86426	5.79255	4.41234	1.53534	4.32391	2.44824	13.0927	17.8627	6.49761	5.41683	4.51096	0.945163	6.74012	6.77932	9.67777	2.44473	4.651	2.61038	FALSE	FALSE	FALSE	FALSE
MMETSP0851-20130426|54159_1	0.0871026	24.2847	30.1075	16.7446	31.7386	15.4446	27.5519	28.0513	19.9161	7.61996	19.3467	14.8701	23.6968	21.5102	32.2421	42.5472	39.7158	144.533	141.148	97.1877	50.7634	33.8322	57.97	19.9957	45.2858	25.3269	51.223	34.9627	53.7739	FALSE	FALSE	FALSE	FALSE
MMETSP0851-20130426|116788_1	0.0871026	3.99983	4.39926	7.19859	2.87159	2.92915	5.02057	1.68308	4.57092	2.07817	0	9.84359	0.87766	0.551543	3.83834	3.97799	17.1376	0.770159	0	0.138247	5.57159	6.41944	12.7597	3.14539	8.40635	2.88274	2.56115	3.84911	1.56623	FALSE	FALSE	FALSE	FALSE
MMETSP0851-20130426|190869_1	0.0878127	24.1419	28.7327	15.0232	21.9147	30.8892	28.5315	28.7526	29.2212	14.2008	11.2856	32.4629	24.0479	27.5771	31.2185	22.8302	33.7312	19.639	27.1776	17.5574	35.5963	44.4156	183.519	22.6917	10.3046	19.7674	58.3244	25.6607	148.618	FALSE	FALSE	FALSE	FALSE
MMETSP0851-20130426|5826_1	0.0916274	0.428554	3.98683	2.03439	2.11591	1.73086	1.10208	3.08564	6.36664	0.692724	0.403057	6.28314	8.25	0.183848	2.43095	8.47485	3.53634	0	1.20546	0.552988	4.643	5.37845	4.25323	1.79737	0.813518	2.47092	3.14323	4.49063	0.870128	FALSE	FALSE	FALSE	FALSE
MMETSP0851-20130426|158823_1	0.0934689	2.85702	3.43692	6.72912	4.68522	7.98858	12.4902	3.64667	7.01963	0.519543	15.7192	4.81707	5.26596	5.33158	102.228	65.7234	70.9988	890.175	797.684	692.203	188.351	172.804	252.201	2.02204	4.06759	2.88274	261.354	51.1611	382.16	FALSE	FALSE	FALSE	FALSE
MMETSP0851-20130426|193679_1	0.0942068	19.2849	28.4577	17.0575	19.6477	24.8977	18.9802	22.0203	20.5691	15.5863	16.9284	21.7816	19.484	26.6579	18.1682	16.0849	8.43281	53.0126	15.2326	35.3913	26.7746	15.2678	20.4785	16.6256	14.6433	18.7378	22.0026	29.3494	29.0623	FALSE	FALSE	FALSE	FALSE
MMETSP0851-20130426|189539_1	0.0942068	190.563	261.619	2223.43	255.722	2149.99	1276.69	1762.88	2376.23	2938.36	3171.65	1056.61	4242.61	3387.39	943.592	1822.09	2169.14	4576.67	1938.92	360.687	148.576	241.163	205.888	297.015	1306.51	510.245	268.921	679.849	241.199	FALSE	FALSE	FALSE	FALSE
MMETSP0851-20130426|74463_1	0.0950472	8.85677	11.823	12.0498	9.82385	7.85544	6.2451	7.85437	8.97859	10.2177	8.46419	3.97932	11.4096	7.17006	4.98984	11.934	4.62444	0.641799	4.27389	4.28566	4.643	7.80742	9.60916	6.06611	12.4739	9.47186	11.2923	8.82087	10.9636	Uncharacterized conserved protein (DUF2358)	-	DUF2358	Name=Pfam:DUF2358; Dbxref=Pfam:PF10184.4; Description=uncharacterized conserved protein (duf2358); Ontology_term=InterPro:IPR018790; score=32.50; evalue=5.80e-08;
MMETSP0851-20130426|167300_1	0.0950472	13.428	9.89834	9.38947	8.16135	10.252	7.34718	8.27514	5.8769	10.7372	6.85197	2.51326	6.84575	9.19238	5.75751	5.18869	1.90418	0.898519	1.31504	3.31793	5.41683	11.7979	4.41076	8.31281	7.86401	13.1782	8.38195	8.82087	5.91687	FALSE	FALSE	FALSE	FALSE
MMETSP0851-20130426|195366_1	0.0975312	9.71388	14.0226	9.85894	8.61476	9.18687	6.73491	12.3426	6.69313	7.61996	5.44127	2.93213	7.37234	18.0171	10.1076	6.05347	18.2258	34.5288	190.462	20.4606	8.20263	12.1449	8.03389	8.76215	25.7614	7.20685	10.5938	13.953	9.91945	Glutathione S-transferase, N-terminal domain	ko:K07393	GST_N_2	Name=Pfam:GST_N_2; Dbxref=Pfam:PF13409.1; Description=glutathione s-transferase n-terminal domain; score=25.60; evalue=8.00e-06;
MMETSP0851-20130426|172087_1	0.0975312	1.14281	3.5744	4.85123	1.96477	2.13029	3.18378	56.6637	5.38716	7.10042	3.42598	5.86426	4.3883	0.735391	1.1515	0.691825	0.544052	0	6.90398	0.414741	1.23813	4.68445	70.7297	95.0357	0	2.0591	12.2237	3.04721	2.43636	FALSE	FALSE	FALSE	FALSE
MMETSP0851-20130426|129654_1	0.0984152	7.99967	11.1356	8.92	4.98749	7.7223	5.02057	7.99462	3.42819	3.80998	11.8902	1.46607	4.9149	2.39002	10.6194	11.0692	3.53634	55.4514	85.9162	31.3821	6.50019	17.3498	15.9102	6.51545	4.06759	3.29456	7.3342	36.0854	13.2259	ESSS subunit of NADH:ubiquinone oxidoreductase (complex I)	-	ESSS	Name=Pfam:ESSS; Dbxref=Pfam:PF10183.4; Description=esss subunit of nadh:ubiquinone oxidoreductase (complex i); Ontology_term=InterPro:IPR019329; score=48.80; evalue=6.70e-13;
MMETSP0851-20130426|7317_1	0.0989634	17.5707	13.8852	15.9621	16.625	20.6372	16.4087	18.5139	23.9973	10.7372	20.1528	32.6723	25.1011	15.8109	24.0536	40.9906	68.8226	37.096	172.161	28.0642	120.254	111.386	131.85	12.3569	20.0668	15.6492	183.937	31.1136	96.0621	Phosphoglycerate mutase family	ko:K01834	His_Phos_1	Name=Pfam:His_Phos_1; Dbxref=Pfam:PF00300.17; Description=histidine phosphatase superfamily (branch 1); Ontology_term=InterPro:IPR013078; score=128.30; evalue=2.40e-37;
MMETSP0851-20130426|9722_1	0.0989634	21.8562	19.6592	14.5537	20.2522	15.9772	8.0819	10.0985	13.3863	19.2231	7.85961	2.72269	8.7766	24.4517	9.21202	15.3931	46.7885	4.36423	5.36976	5.80638	10.8337	20.8198	28.985	15.9516	13.5586	16.2669	11.1759	19.5663	11.1376	alpha/beta hydrolase fold	-	-	FALSE
MMETSP0851-20130426|97421_1	0.0989634	12.5709	11.9605	14.0842	12.242	19.572	14.0821	22.7216	21.0589	11.0836	0.604585	17.8022	12.2872	14.7078	14.5857	15.3931	4.62444	33.1168	41.5335	12.304	12.3813	14.4004	3.62313	11.4582	4.88111	14.4137	9.31327	7.85859	6.96102	splicing factor	-	-	FALSE
MMETSP0851-20130426|51937_1	0.0989634	10.2853	10.5857	6.57263	9.97499	17.708	19.5925	10.379	4.89741	2.59771	6.65044	9.63415	10.1809	16.914	129.992	218.79	123.228	2476.7	1550.77	1354.68	921.016	419.345	753.925	5.16742	13.8298	9.26595	794.772	265.749	927.556	Zinc-binding dehydrogenase	-	ADH_zinc_N_2	FALSE
MMETSP0851-20130426|133855_1	0.0989634	1.99992	2.47458	1.09544	3.325	1.06514	3.55114	5.18949	2.28546	6.4077	0	8.37752	8.42553	8.0893	4.09423	1.72956	0	29.6511	168.545	2.21195	4.48823	2.60247	0.472582	4.26874	0.542345	4.53002	0.814911	6.57556	2.43636	FALSE	FALSE	FALSE	FALSE
MMETSP0851-20130426|8412_1	0.0989634	1.99992	3.84935	3.5993	10.4284	1.99715	0.612265	0.561026	2.7752	6.92724	1.61223	3.56045	0.702128	0	1.40739	4.15095	8.70484	0	0.547935	0	2.47626	3.12297	2.36291	1.79737	4.60994	3.50047	0	0.481138	1.91428	FALSE	FALSE	FALSE	FALSE
MMETSP0851-20130426|38213_1	0.101767	29.8559	31.7572	31.7677	28.7159	23.8326	28.5315	19.3554	153.616	30.653	24.3849	39.5838	24.0479	66.7367	30.195	51.0221	987.183	11.6807	5.041	13.6865	15.7862	235.437	146.185	41.5641	90.5717	31.5042	22.119	32.2363	27.496	Belongs to the peptidase C1 family	ko:K01365	Inhibitor_I29,Peptidase_C1	Name=Pfam:Peptidase_C1; Dbxref=Pfam:PF00112.18; Description=papain family cysteine protease; Ontology_term=InterPro:IPR000668; score=133.90; evalue=6.70e-39;
MMETSP0851-20130426|20637_1	0.103091	26.856	13.3353	19.7179	18.1363	11.184	21.0619	13.7451	5.06066	11.4299	2.41834	7.12089	1.40426	4.04465	13.946	10.5503	4.89647	67.2605	35.5062	13.5482	13.7742	20.1258	5.1984	1.12335	5.15228	6.1773	5.70438	13.953	9.39738	Produces ATP from ADP in the presence of a proton gradient across the membrane. The alpha chain is a regulatory subunit	ko:K02111	ATP-synt_ab,ATP-synt_ab_C,ATP-synt_ab_N	Name=Pfam:ATP-synt_ab_C; Dbxref=Pfam:PF00306.22; Description=atp synthase alpha/beta chain c terminal domain; Ontology_term=InterPro:IPR000793; score=54.40; evalue=1.40e-14;
MMETSP0851-20130426|9728_1	0.106345	8.71392	7.42375	9.38947	10.8818	5.72515	19.7149	4.48821	4.40767	9.00541	7.05349	5.44539	0.87766	2.75771	4.22218	1.55661	1.63216	0	0	0.414741	0.928599	6.76643	3.62313	1.79737	0.271173	5.35366	2.44473	5.4529	2.78441	FALSE	FALSE	FALSE	FALSE
MMETSP0851-20130426|6354_1	0.107365	22.5705	39.3184	23.1607	34.3079	29.6909	35.3889	28.4721	29.5477	16.4522	39.4996	60.9465	62.4894	72.0683	35.1848	34.7642	28.5627	79.198	18.6298	74.6534	35.9058	26.3717	18.5882	77.062	42.0318	38.0933	22.2354	69.2839	26.1038	PhoD-like phosphatase	ko:K01113	PhoD	Name=Pfam:PhoD; Dbxref=Pfam:PF09423.5; Description=phod-like phosphatase; Ontology_term=InterPro:IPR018946; score=227.90; evalue=1.50e-67;
MMETSP0851-20130426|43810_1	0.107953	12.7138	21.3089	12.0498	13.7534	17.708	13.2249	14.1659	8.6521	11.6031	14.107	9.21527	9.82979	26.2902	10.6194	11.5881	14.1454	7.18815	17.6435	9.26256	19.3458	16.6558	36.0737	9.88551	16.8127	20.1792	20.3728	21.0097	27.496	Macrocin-O-methyltransferase (TylF)	-	TylF	Name=Pfam:TylF; Dbxref=Pfam:PF05711.6; Description=macrocin-o-methyltransferase (tylf); Ontology_term=InterPro:IPR008884; score=261.10; evalue=6.70e-78;
MMETSP0851-20130426|71607_1	0.108554	7.71396	7.1488	5.47719	7.85908	4.92629	4.28585	3.36616	5.8769	6.58088	13.5024	3.97932	4.73936	4.2285	7.54874	5.88051	6.2566	27.2123	22.6845	15.3454	8.97646	3.46997	3.15054	8.98683	0.813518	5.14775	13.0386	3.36797	2.08831	-	-	-	FALSE
MMETSP0851-20130426|51761_1	0.108554	17.8564	11.4106	18.153	13.7534	9.05373	29.1438	9.11668	17.6307	7.44678	5.03821	23.8759	22.117	11.2147	16.8887	15.3931	7.88876	35.1706	11.5066	49.4925	24.2983	11.9714	8.03389	10.5595	8.9487	10.0896	19.2086	12.8304	19.1428	FALSE	FALSE	FALSE	FALSE
MMETSP0851-20130426|194813_1	0.109117	22.4276	26.808	15.0232	21.6125	51.5264	23.7559	21.88	19.5897	22.1672	19.1452	12.9852	27.0319	24.4517	32.1141	29.9214	33.7312	32.9885	23.5612	61.9347	19.0363	20.4728	28.67	16.8503	15.728	29.8569	22.2354	16.8398	15.8363	Tetratricopeptide repeat	-	TPR_12	Name=Pfam:TPR_12; Dbxref=Pfam:PF13424.1; Description=tetratricopeptide repeat; score=54.90; evalue=5.60e-15;
MMETSP0851-20130426|189074_1	0.112671	9.99958	17.3221	15.1796	25.542	15.1783	20.3272	14.4464	12.7333	12.2958	304.106	5.65483	9.47873	27.5771	13.6901	26.2893	35.0914	70.2128	114.738	39.8152	26.4651	22.0343	26.6221	13.2556	21.965	22.2383	23.6324	12.3492	29.9324	FALSE	FALSE	FALSE	FALSE
MMETSP0851-20130426|173875_1	0.112671	4.42839	4.81169	6.25965	3.92954	4.52686	2.93887	8.55565	11.7538	6.75406	0.806114	0	2.80851	1.83848	5.50162	5.70756	3.80837	0.12836	0.328761	0.552988	2.16673	9.36891	3.30807	1.12335	1.62704	6.79503	2.67757	3.84911	2.08831	FALSE	FALSE	FALSE	FALSE
MMETSP0851-20130426|57119_1	0.112754	7.42826	4.39926	7.98105	6.95226	9.5863	4.65321	7.15308	12.57	17.4913	6.85197	5.02651	9.12766	7.53775	6.14135	4.32391	21.7621	1.02688	4.05472	2.76494	5.41683	7.63392	11.4995	5.3921	9.76222	10.5014	5.58796	7.21708	6.61297	FALSE	FALSE	FALSE	FALSE
MMETSP0851-20130426|842_1	0.112754	27.4274	34.6442	16.4316	37.3306	29.6909	17.6332	22.3008	20.4059	16.7986	26.6017	14.8701	22.8192	34.3795	58.9825	50.5032	39.7158	72.1382	39.3417	109.63	21.203	85.5347	35.1286	16.6256	11.1181	22.0324	30.1517	53.7271	31.4986	FALSE	FALSE	FALSE	Name=Pfam:SURNod19; Dbxref=Pfam:PF07712.7; Description=stress up-regulated nod 19; Ontology_term=InterPro:IPR011692; score=36.20; evalue=2.00e-09;
MMETSP0851-20130426|142377_1	0.112782	9.85673	16.4972	23.3172	15.1136	7.85544	6.49001	15.7087	9.79483	9.87132	31.8415	2.93213	16.5	20.7748	13.818	15.3931	14.4174	67.5173	69.6973	17.5574	17.9529	15.4413	15.9102	13.4802	23.8632	10.0896	16.4146	11.5473	10.0935	-	-	-	FALSE
MMETSP0851-20130426|189320_1	0.112782	46.4266	62.827	32.8631	40.9579	27.1612	54.9814	62.2739	45.0562	26.8431	32.4461	42.5159	25.2766	35.4826	41.9659	45.3145	49.5088	81.2518	41.7526	41.8889	30.1795	41.4661	27.8823	40.216	49.3534	51.6834	29.104	35.6042	28.3662	secondary active sulfate transmembrane transporter activity	-	STAS,Sulfate_transp	Name=Pfam:Sulfate_transp; Dbxref=Pfam:PF00916.15; Description=sulfate transporter family; Ontology_term=InterPro:IPR011547; score=135.30; evalue=1.80e-39;
MMETSP0851-20130426|110794_1	0.113233	6.57115	4.26179	5.94666	5.28977	4.39372	6.2451	7.99462	4.08118	4.50271	4.2321	3.76988	7.37234	1.47078	4.47807	5.36164	5.1685	0.898519	0.547935	2.62669	6.80973	3.46997	5.98603	5.3921	2.71173	5.76548	6.28646	9.94353	5.39479	FALSE	FALSE	FALSE	FALSE
MMETSP0851-20130426|22239_1	0.115322	3.85698	0.549908	0.782456	1.05795	0.798858	1.10208	2.52462	2.7752	0	3.62751	7.74921	1.57979	0	3.45451	2.07547	0	5.26275	2.19174	7.46534	0.4643	1.21449	0	0.898683	2.44055	3.08865	1.39699	1.12266	0.522077	FALSE	FALSE	FALSE	FALSE
MMETSP0851-20130426|153106_1	0.115322	21.4277	20.4841	17.6835	29.6227	20.7703	16.1638	18.0931	17.7939	20.4354	15.9207	18.8494	17.5532	22.6133	21.7506	32.8617	33.4592	123.61	82.519	103.271	64.0733	27.4127	47.2582	21.5684	14.9145	19.5614	60.6527	24.3777	74.831	FALSE	FALSE	FALSE	FALSE
MMETSP0851-20130426|193561_1	0.117404	77.4253	74.9249	70.421	78.1374	61.9115	82.1659	63.5362	48.1579	37.4071	28.4155	79.1676	63.016	35.4826	89.3054	66.2422	39.7158	104.1	203.393	51.0132	42.2513	43.5481	32.2931	70.7712	19.5244	52.9188	46.9156	37.6892	34.4571	Belongs to the formate--tetrahydrofolate ligase family	ko:K00288,ko:K01938	FTHFS	Name=Pfam:FTHFS; Dbxref=Pfam:PF01268.14; Description=formate--tetrahydrofolate ligase; Ontology_term=InterPro:IPR000559; score=705.70; evalue=2.40e-212;
MMETSP0851-20130426|155481_1	0.119979	38.8555	40.5557	41.4702	36.4238	46.3338	39.7972	43.9003	33.4657	14.0277	44.5378	17.5928	33.3511	59.3828	41.8379	31.8239	22.0341	196.519	167.668	87.9252	95.4909	54.999	45.5254	39.542	40.1336	37.4756	56.5781	51.1611	96.2361	FALSE	FALSE	FALSE	Name=Pfam:zf-CCCH; Dbxref=Pfam:PF00642.19; Description=zinc finger c-x8-c-x5-c-x3-h type (and similar); Ontology_term=InterPro:IPR000571; score=64.00; evalue=5.90e-18;
MMETSP0851-20130426|8559_1	0.12069	2.85702	5.63655	3.12982	4.38295	1.46457	4.65321	3.92718	12.57	3.11726	1.81376	8.37752	6.67021	1.65463	0.895613	4.84277	45.4284	0	1.09587	1.10598	1.08337	19.7788	11.4995	2.47138	15.4568	3.50047	3.14323	1.12266	2.26233	FALSE	FALSE	FALSE	FALSE
MMETSP0851-20130426|157120_1	0.12069	10.4281	25.0208	16.1186	29.7738	23.9657	15.3066	16.5503	17.3042	1.90499	7.05349	17.5928	11.5851	15.2594	11.7709	22.3114	24.2103	54.6813	81.3136	18.8016	13.4647	19.6053	6.45862	9.2115	14.9145	8.64822	9.19686	17.4814	12.5298	FALSE	FALSE	FALSE	Name=Pfam:Beta-lactamase; Dbxref=Pfam:PF00144.19; Description=beta-lactamase; Ontology_term=InterPro:IPR001466; score=56.30; evalue=2.30e-15;
MMETSP0851-20130426|8750_1	0.120886	79.1396	69.7008	68.6996	79.951	119.829	78.3699	81.4891	143.821	63.9038	35.0659	74.5599	83.0266	55.3381	90.7128	66.7611	312.014	25.5436	26.4105	52.3956	60.978	165.691	157.212	139.52	58.3021	66.0971	61.584	181.71	64.5635	FALSE	FALSE	FALSE	Name=Pfam:Na_H_Exchanger; Dbxref=Pfam:PF00999.16; Description=sodium/hydrogen exchanger family; Ontology_term=InterPro:IPR006153; score=107.30; evalue=5.30e-31;
MMETSP0851-20130426|12394_1	0.122784	17.1421	26.2581	29.5768	25.2397	50.8606	23.3885	27.35	22.3649	9.87132	82.8282	79.1676	30.016	94.4977	158.779	181.258	176.273	1688.06	660.371	650.591	566.91	465.843	414.769	54.1456	22.2362	46.7415	152.156	431.902	535.128	Helicase associated domain	-	HA	Name=Pfam:HA; Dbxref=Pfam:PF03457.9; Description=helicase associated domain; Ontology_term=InterPro:IPR005114; score=101.20; evalue=2.30e-29;
MMETSP0851-20130426|122515_1	0.122784	0.999958	2.33711	2.19088	1.36023	1.73086	0.734718	1.26231	1.79572	0	3.42598	2.93213	0.87766	1.65463	1.27945	1.55661	0.544052	13.4778	0.438348	10.9215	1.70243	5.20495	0.787636	0.449341	0	0.41182	1.97907	2.08493	4.17661	FALSE	FALSE	FALSE	FALSE
MMETSP0851-20130426|195543_1	0.122784	14.7137	14.8475	16.7446	14.6602	8.52115	12.98	19.0749	12.7333	2.25135	12.0917	11.5191	24.9255	17.4655	12.1547	68.8366	14.4174	7.44487	6.13687	12.7187	5.57159	1032.84	14.4925	15.0529	13.5586	13.1782	5.93721	21.0097	313.594	FALSE	FALSE	FALSE	Name=Pfam:Abhydrolase_5; Dbxref=Pfam:PF12695.2; Description=alpha/beta hydrolase family; score=29.50; evalue=4.50e-07;
MMETSP0851-20130426|149394_1	0.125639	63.1402	53.2036	53.6765	54.5602	57.1184	50.0833	51.1936	48.8109	33.7703	91.4939	57.8049	46.6915	47.2488	48.619	46.3523	24.4824	59.0455	51.2867	77.9714	37.2987	47.712	37.4915	45.3835	29.0155	52.7129	37.6023	60.6234	50.4674	FALSE	FALSE	FALSE	Name=Pfam:Big_5; Dbxref=Pfam:PF13205.1; Description=bacterial ig-like domain; score=46.40; evalue=4.50e-12;
MMETSP0851-20130426|51934_1	0.125695	4.71409	3.98683	4.53824	2.56931	1.73086	2.0817	4.06744	3.1017	0.346362	3.82904	0.209438	0.702128	0.919238	1.40739	3.80504	4.62444	11.424	0	4.00917	0.773833	3.12297	1.10269	2.24671	0	0.41182	0.931327	2.24531	1.56623	FALSE	FALSE	FALSE	FALSE
MMETSP0851-20130426|189010_1	0.1275	113.424	80.424	70.8905	96.576	112.106	90.2478	128.054	166.349	228.253	53.002	54.2444	106.372	61.4051	65.1239	53.7894	455.1	20.7943	41.3143	38.8474	35.7511	264.238	250.468	134.802	239.445	166.375	67.8705	58.8593	41.244	Chlorophyll A-B binding protein	-	Chloroa_b-bind	Name=Pfam:Chloroa_b-bind; Dbxref=Pfam:PF00504.16; Description=chlorophyll a-b binding protein; Ontology_term=InterPro:IPR022796; score=297.60; evalue=2.00e-89;
MMETSP0851-20130426|148352_1	0.130496	11.8566	24.0585	15.0232	24.6352	17.0423	13.4698	22.7216	10.9376	7.79314	22.3697	16.3362	13.6915	18.7525	23.5418	38.7422	18.4978	68.5441	141.477	65.1144	20.5839	48.9265	39.5393	15.0529	16.5415	26.7683	16.5311	28.8683	23.8415	Major Facilitator Superfamily	ko:K12307	MFS_1	Name=Pfam:MFS_1; Dbxref=Pfam:PF07690.11; Description=major facilitator superfamily; Ontology_term=InterPro:IPR011701; score=110.90; evalue=4.80e-32;
MMETSP0851-20130426|98620_1	0.130496	29.8559	38.3561	25.9775	34.459	40.0761	24.858	30.8564	85.868	37.4071	34.0583	17.1739	35.633	43.0203	53.9927	34.5912	312.286	10.2688	11.6162	21.2901	22.7507	162.394	178.636	35.9473	62.6409	34.181	20.6056	38.9722	22.9714	FALSE	FALSE	FALSE	FALSE
MMETSP0851-20130426|191777_1	0.13103	52.7121	60.3524	50.8596	44.434	51.6595	45.1851	58.9078	45.5459	37.7535	52.3974	34.9761	46.516	57.5443	56.0398	77.3114	115.883	178.805	203.065	130.091	85.5859	61.7654	96.7217	51.8989	66.1661	56.6252	97.9058	70.7273	107.374	FALSE	FALSE	FALSE	Name=Pfam:Mre11_DNA_bind; Dbxref=Pfam:PF04152.9; Description=mre11 dna-binding presumed domain; Ontology_term=InterPro:IPR007281; score=111.20; evalue=4.20e-32;
MMETSP0851-20130426|3099_1	0.132177	4.42839	8.38609	6.25965	8.61476	6.52401	3.30623	7.29334	11.5905	2.59771	6.65044	5.86426	8.95213	10.847	3.96629	5.36164	21.218	1.02688	0.767109	2.62669	6.03589	10.0629	5.82851	6.74012	9.21987	7.82458	3.95814	10.9058	5.22077	FALSE	FALSE	FALSE	FALSE
MMETSP0851-20130426|176287_1	0.138735	2.99987	3.71188	3.5993	2.11591	0.798858	2.81642	5.04924	38.3631	0	7.05349	0.418876	1.75532	27.761	8.44435	15.0472	364.787	1.41196	0.876696	0.414741	4.02393	77.3802	219.278	2.02204	60.4715	6.58912	1.62982	3.84911	0.696102	FALSE	FALSE	FALSE	FALSE
MMETSP0851-20130426|194013_1	0.139219	19.9992	21.8588	12.0498	18.2875	28.6258	17.7557	19.3554	13.0598	18.3572	12.4948	10.4719	23.1702	16.1786	22.3903	25.5975	16.8656	104.613	92.601	102.165	32.0367	31.4032	41.1146	16.8503	10.5757	12.9723	41.9097	17.8021	84.5764	Enoyl-CoA hydratase	-	ECH_1	Name=Pfam:ECH; Dbxref=Pfam:PF00378.15; Description=enoyl-coa hydratase/isomerase family; Ontology_term=InterPro:IPR001753; score=59.80; evalue=1.90e-16;
MMETSP0851-20130426|188570_1	0.142912	20.142	25.1583	20.3439	25.2397	28.4926	16.4087	17.8126	19.0999	9.69814	24.788	16.9645	21.2394	28.1287	32.498	27.5	51.1409	29.7795	15.6709	52.9486	16.0957	22.3813	17.0129	34.1499	36.066	26.5624	16.7639	30.7929	18.0987	major facilitator superfamily	-	-	Name=Pfam:MFS_1; Dbxref=Pfam:PF07690.11; Description=major facilitator superfamily; Ontology_term=InterPro:IPR011701; score=82.50; evalue=2.20e-23;
MMETSP0851-20130426|161668_1	0.142912	0.142851	3.84935	1.7214	1.51136	3.46172	0.489812	1.96359	2.28546	0.173181	0	0	0.87766	3.30926	1.27945	2.42139	0	24.3884	55.6702	4.83865	3.09533	1.21449	2.67796	3.37006	0	1.85319	0	0.481138	0.696102	FALSE	FALSE	FALSE	FALSE
MMETSP0851-20130426|190457_1	0.145039	26.2846	39.7308	33.9586	47.6079	77.223	49.5935	57.6454	36.4041	38.6194	120.917	401.702	47.2181	174.104	69.6019	110.519	70.7268	1951.07	592.208	472.39	514.753	342.659	373.97	146.261	46.9129	208.999	308.851	238.805	396.082	plant-type cell wall organization	ko:K20628	DPBB_1,Pollen_allerg_1	Name=Pfam:DPBB_1; Dbxref=Pfam:PF03330.13; Description=rare lipoprotein a (rlpa)-like double-psi beta-barrel; Ontology_term=InterPro:IPR009009; score=58.00; evalue=6.50e-16;
MMETSP0851-20130426|145611_1	0.145039	39.4269	36.7063	40.0617	32.6454	29.6909	21.6742	23.4228	20.8956	16.7986	81.2159	22.8287	24.3989	35.4826	24.4374	25.9434	10.881	29.5228	12.2737	56.9578	27.2389	22.0343	8.664	24.2644	13.2875	25.3269	21.7698	36.8873	17.7506	FALSE	FALSE	FALSE	FALSE
MMETSP0851-20130426|189324_1	0.145039	27.4274	25.1583	38.9663	28.867	32.7532	16.8985	23.1423	31.3434	15.7595	31.8415	10.8908	20.7128	23.1648	24.4374	19.717	54.9493	5.51947	13.3696	21.0136	29.8699	39.7311	51.1963	21.5684	16.8127	17.5023	33.6442	25.6607	26.7999	FALSE	FALSE	FALSE	FALSE
MMETSP0851-20130426|127963_1	0.145039	2.99987	1.37477	4.06877	2.41818	1.59772	6.12265	1.96359	2.28546	2.25135	1.81376	1.46607	0.351064	4.2285	1.79123	2.59434	2.17621	0	0.328761	0.829483	1.54767	0.867491	3.15054	1.12335	0	1.85319	3.49248	21.8116	3.65454	FALSE	FALSE	FALSE	FALSE
MMETSP0851-20130426|94006_1	0.146269	3.85698	2.33711	3.12982	3.325	2.13029	4.04095	3.64667	7.99911	1.38545	0.806114	0	2.28192	6.61851	4.98984	1.90252	10.337	19.7674	45.917	4.28566	2.7858	6.59293	2.36291	1.34802	3.25407	2.88274	1.51341	1.28304	1.91428	FALSE	FALSE	FALSE	FALSE
MMETSP0851-20130426|190974_1	0.148564	94.996	91.9721	74.3333	77.5329	83.8801	82.5333	86.2578	54.198	63.0379	45.9485	33.929	61.6117	64.5305	63.3326	73.5064	64.1982	120.273	293.364	66.4969	48.9062	67.4908	53.2442	75.4893	35.5236	67.5384	45.635	62.7084	55.6882	FALSE	FALSE	FALSE	FALSE
MMETSP0851-20130426|70_1	0.149726	548.834	620.158	2273.5	485.601	2113.25	1107.22	1441.7	2516.62	3152.76	2492.7	889.483	2812.37	3074.3	729.669	2378.15	4322.5	3482.02	1662.54	422.898	273.163	343.18	363.73	390.253	1438.57	390.611	368.922	635.423	418.183	-	-	-	FALSE
MMETSP0851-20130426|138653_1	0.150904	1.42851	1.51225	0.156491	0	0.665715	1.71434	3.64667	1.14273	0	0.806114	0.209438	0.175532	0	3.58245	5.01573	13.3293	43.7707	70.0261	14.2395	2.47626	3.46997	0	3.37006	0	1.23546	0.931327	0	1.91428	FALSE	FALSE	FALSE	FALSE
MMETSP0851-20130426|8912_1	0.151856	13.9994	6.87385	8.76351	16.625	3.99429	9.06152	4.90898	7.01963	5.02225	1.4107	5.65483	5.79255	13.6047	4.73395	5.01573	1.90418	1.9254	2.73967	21.1518	3.55963	2.77597	2.52044	7.41413	8.9487	13.3841	1.51341	2.72645	4.87271	FALSE	FALSE	FALSE	Name=Pfam:PsbM; Dbxref=Pfam:PF05151.7; Description=photosystem ii reaction centre m protein (psbm); Ontology_term=InterPro:IPR007826; score=25.50; evalue=6.30e-06;
MMETSP0851-20130426|113026_1	0.151932	12.1424	4.26179	12.5193	7.55681	4.66001	4.40831	7.4336	6.85638	2.07817	5.23974	1.88494	8.07447	3.4931	7.54874	6.22642	5.98458	1.2836	1.20546	1.93546	7.42879	11.1039	4.09571	10.5595	7.05049	6.79503	8.26553	6.09442	5.56882	FALSE	FALSE	FALSE	FALSE
MMETSP0851-20130426|195001_1	0.153561	39.8555	52.6537	38.0274	39.7488	31.5549	51.1853	41.2354	48.4844	27.1894	39.4996	31.8346	42.3032	50.0066	37.7437	29.0566	19.0418	61.8694	176.983	39.1239	20.1196	44.4156	17.0129	39.7667	15.9992	52.7129	21.6534	35.4439	20.8831	FALSE	FALSE	FALSE	FALSE
MMETSP0851-20130426|142154_1	0.153561	0.428554	3.84935	1.25193	2.11591	1.864	1.34698	4.48821	1.30598	0.865905	7.25502	3.35101	3.15958	0	3.58245	2.07547	19.0418	0.12836	1.53422	0.138247	1.8572	1.73498	3.15054	3.59473	5.9658	3.91229	1.51341	4.97176	2.61038	FALSE	FALSE	FALSE	FALSE
MMETSP0851-20130426|4814_1	0.153561	2.99987	6.59889	7.51158	3.02272	7.58915	3.67359	2.52462	2.61195	1.55863	5.44127	0.209438	2.80851	5.51543	2.55889	5.88051	7.88876	0	0.109587	0.96773	3.7144	2.25548	3.4656	6.06611	2.9829	5.35366	2.9104	6.57556	2.78441	FALSE	FALSE	FALSE	FALSE
MMETSP0851-20130426|189321_1	0.153561	16.5707	12.5104	15.3361	17.2295	18.2406	14.6944	14.4464	13.7128	11.9495	16.9284	11.3097	15.4468	8.45699	12.6665	11.2422	53.5892	3.209	3.94513	7.18885	6.19066	44.2421	30.2452	11.4582	10.3046	10.5014	10.5938	14.4342	8.00517	FALSE	FALSE	FALSE	FALSE
MMETSP0851-20130426|71466_1	0.154541	11.2852	9.07348	6.57263	8.61476	3.46172	8.93907	5.47001	7.83586	5.71497	8.66572	6.49258	0.526596	1.83848	9.97969	2.42139	0.272026	23.4898	7.23274	19.9076	4.79776	4.85795	5.51345	7.41413	1.89821	11.325	9.31327	7.0567	5.91687	FALSE	FALSE	FALSE	FALSE
MMETSP0851-20130426|121384_1	0.15592	29.2845	39.0435	27.6989	31.7386	32.4869	32.0827	25.2462	27.5888	28.748	24.788	31.2063	19.484	53.4997	32.6259	35.456	91.1288	7.57323	8.21902	19.4928	21.6673	68.0113	72.9351	24.7138	23.592	24.9151	20.722	28.0664	25.5817	DNA photolyase activity	-	DNA_photolyase,FAD_binding_7	Name=Pfam:FAD_binding_7; Dbxref=Pfam:PF03441.9; Description=fad binding domain of dna photolyase; Ontology_term=InterPro:IPR005101; score=227.80; evalue=1.30e-67;
MMETSP0851-20130426|87583_1	0.158088	39.4269	25.5707	22.6912	32.7965	50.0618	39.9197	42.2172	67.0946	34.9826	15.3162	27.0175	51.0798	40.6303	24.4374	28.3648	209.46	15.2748	7.23274	14.7924	20.4292	98.2	88.5303	133.454	70.5049	64.2439	18.6265	114.671	26.2779	Fatty acid desaturase	-	FA_desaturase	Name=Pfam:FA_desaturase; Dbxref=Pfam:PF00487.19; Description=fatty acid desaturase; Ontology_term=InterPro:IPR005804; score=108.50; evalue=3.30e-31;
MMETSP0851-20130426|168309_1	0.158088	16.8564	9.21096	12.5193	10.8818	41.0081	9.79624	12.3426	10.1213	15.4131	8.26266	6.28314	3.68617	11.0309	14.2019	15.3931	7.88876	42.2304	95.779	17.0044	21.6673	8.15442	2.67796	18.8723	19.2533	10.9132	6.51929	10.585	8.00517	negative regulation of Fas signaling pathway	ko:K06890	Bax1-I	Name=Pfam:Bax1-I; Dbxref=Pfam:PF01027.15; Description=inhibitor of apoptosis-promoting bax1; Ontology_term=InterPro:IPR006214; score=130.70; evalue=4.60e-38;
MMETSP0851-20130426|162850_1	0.158088	4.28554	1.37477	0.938947	0.604545	1.99715	1.71434	5.47001	2.93845	0	3.42598	2.72269	2.98404	0.183848	3.45451	1.90252	0.816078	74.8338	7.5615	30.5526	19.8101	6.41944	6.9312	3.8194	0	1.23546	11.8744	11.3869	14.7922	FALSE	FALSE	FALSE	FALSE
MMETSP0851-20130426|193083_1	0.158088	45.8552	58.8401	58.6842	58.4897	52.8578	45.1851	42.077	41.9545	37.5803	22.7727	18.2211	40.7234	31.0702	46.6998	52.0598	14.6894	88.4399	15.2326	93.455	36.6797	52.57	23.314	36.6213	108.74	33.5633	38.9993	69.6047	39.8518	FALSE	FALSE	FALSE	Name=Pfam:ELMO_CED12; Dbxref=Pfam:PF04727.8; Description=elmo/ced-12 family; Ontology_term=InterPro:IPR006816; score=85.70; evalue=2.20e-24;
MMETSP0851-20130426|52711_1	0.158088	1.28566	3.5744	5.3207	5.59204	3.728	6.12265	2.80513	2.12221	2.25135	2.61987	1.6755	0.351064	2.94156	3.19862	2.94026	0	15.5315	5.26018	1.52072	1.70243	3.81696	0.157527	0.898683	10.0334	3.29456	0.814911	1.44342	1.74026	FALSE	FALSE	FALSE	FALSE
MMETSP0851-20130426|12755_1	0.158156	16.9993	19.5217	19.4049	10.5795	12.6486	11.8779	23.5631	16.6512	32.0385	6.04585	8.7964	10.5319	20.7748	15.9931	12.1069	11.4251	72.78	162.627	22.396	21.8221	7.11343	21.2662	24.9384	6.23697	20.7969	24.5638	10.4247	10.4415	FALSE	FALSE	FALSE	FALSE
MMETSP0851-20130426|189045_1	0.161004	24.8561	27.6329	20.0309	30.0761	28.4926	59.3897	33.3811	15.3452	13.6813	34.8644	77.4921	26.6809	110.309	42.2218	77.8303	79.9757	621.005	479.224	420.409	225.495	173.672	152.014	27.1851	10.0334	61.3612	200.352	140.172	291.493	FALSE	FALSE	FALSE	Name=Pfam:PT; Dbxref=Pfam:PF04886.7; Description=pt repeat; Ontology_term=InterPro:IPR006970; score=113.30; evalue=1.90e-33;
MMETSP0851-20130426|67212_1	0.165559	8.57107	13.7477	15.0232	7.40567	12.5154	8.3268	8.97642	2.44871	11.4299	8.26266	9.63415	4.73936	2.75771	17.0166	28.5378	2.99229	40.6901	37.9171	65.6674	10.3694	13.3594	17.4855	20.6697	2.44055	11.9428	11.2923	33.1986	14.0961	FALSE	FALSE	FALSE	FALSE
MMETSP0851-20130426|162085_1	0.170897	6.85686	5.49908	5.3207	6.80113	8.78744	6.2451	7.01283	2.93845	8.65905	4.2321	1.6755	2.10638	4.04465	2.55889	1.55661	7.61673	0	0.547935	1.38247	2.94056	6.24594	13.8624	3.59473	18.4397	9.06004	1.62982	1.28304	3.65454	Glycosyl transferase-like protein	-	Glyco_transf_25	Name=Pfam:Glyco_transf_25; Dbxref=Pfam:PF01755.12; Description=glycosyltransferase family 25 (lps biosynthesis protein); Ontology_term=InterPro:IPR002654; score=29.80; evalue=3.80e-07;
MMETSP0851-20130426|182554_1	0.172498	3.71413	2.88702	4.22526	1.81363	3.19543	2.44906	0.981796	2.28546	0	0.806114	0	11.5851	2.94156	1.79123	0.864781	9.79294	0.641799	2.73967	0.276494	1.70243	3.99046	1.57527	1.57269	12.2028	2.26501	20.0235	101.36	1.74026	FALSE	FALSE	FALSE	FALSE
MMETSP0851-20130426|73994_1	0.172498	6.71401	7.42375	8.13754	6.80113	6.52401	8.69416	6.17129	4.57092	4.67589	3.62751	3.76988	2.63298	1.65463	3.83834	4.15095	1.0881	10.1404	4.27389	5.39164	2.94056	5.72544	2.67796	4.04407	2.9829	5.97139	2.56115	0.962277	3.65454	FALSE	FALSE	FALSE	Name=Pfam:efhand; Dbxref=Pfam:PF00036.27; Description=ef hand; Ontology_term=InterPro:IPR002048; score=43.90; evalue=5.50e-12;
MMETSP0851-20130426|124603_1	0.173808	3.71413	2.88702	2.34737	3.02272	5.59201	10.4085	4.06744	13.3863	4.67589	2.41834	5.86426	6.14362	7.7216	4.35012	8.47485	7.88876	0.385079	0.767109	1.79721	1.54767	3.81696	8.664	6.74012	23.0497	7.41276	3.02681	18.4436	4.00259	FALSE	FALSE	FALSE	FALSE
MMETSP0851-20130426|85541_1	0.176767	36.9985	34.3692	33.6456	32.6454	68.1692	45.3076	23.7034	18.7734	21.3013	73.1548	65.973	19.3085	31.8056	246.294	132.139	171.921	1110.18	1153.29	1166.67	304.581	209.759	366.093	37.52	60.2003	21.8264	480.332	103.124	667.91	TIGRFAM Light-dependent protochlorophyllide reductase	ko:K00218	adh_short	Name=Pfam:adh_short; Dbxref=Pfam:PF00106.20; Description=short chain dehydrogenase; Ontology_term=InterPro:IPR002198; score=53.20; evalue=2.90e-14;
MMETSP0851-20130426|160276_1	0.176778	5.5712	5.91151	6.41614	6.64999	6.25772	4.40831	5.18949	8.3256	12.1227	3.62751	9.42471	10.883	10.4793	4.73395	2.42139	2.99229	0.513439	2.5205	3.17968	6.50019	4.16396	0.787636	13.0309	6.23697	6.38321	14.0863	44.2647	3.65454	PFAM HNH endonuclease	-	HNH,HNH_5	Name=Pfam:HNH; Dbxref=Pfam:PF01844.18; Description=hnh endonuclease; Ontology_term=InterPro:IPR002711; score=56.00; evalue=2.30e-15;
MMETSP0851-20130426|149295_1	0.176778	1.99992	2.06215	3.44281	1.6625	0.932001	2.0817	13.1841	7.99911	2.7709	1.81376	16.9645	5.26596	1.47078	1.91917	1.38365	20.1299	0.641799	1.09587	0.276494	1.8572	9.8894	12.2871	6.74012	12.2028	1.85319	1.62982	3.52835	2.08831	FALSE	FALSE	FALSE	FALSE
MMETSP0851-20130426|105236_1	0.176778	6.4283	6.46142	12.5193	8.16135	4.12743	5.75529	6.31155	8.6521	9.87132	4.63515	5.02651	3.15958	11.2147	6.0134	10.5503	2.72026	9.75534	2.95885	17.9721	2.7858	6.93993	1.41774	6.29078	5.15228	3.08865	6.63571	4.33025	6.61297	FALSE	FALSE	FALSE	Name=Pfam:SET; Dbxref=Pfam:PF00856.23; Description=set domain; Ontology_term=InterPro:IPR001214; score=30.50; evalue=3.30e-07;
MMETSP0851-20130426|136251_1	0.176778	0.857107	2.88702	0.156491	0.604545	1.19829	1.46944	0.42077	1.46922	0	0.201528	7.12089	3.8617	1.10309	0.127945	4.66982	0.272026	0	0.328761	0	1.23813	0.867491	3.93818	2.47138	10.3046	1.23546	0.58208	0.641518	2.95843	FALSE	FALSE	FALSE	FALSE
MMETSP0851-20130426|78795_1	0.176778	5.14264	6.18646	4.53824	1.81363	5.19258	7.34718	1.12205	2.44871	5.36861	0.604585	0	4.21277	2.75771	1.53534	1.90252	17.1376	0	1.20546	0.138247	3.7144	0.693993	1.7328	0.674012	0	1.64728	7.79987	8.98125	0.348051	FALSE	FALSE	FALSE	FALSE
MMETSP0851-20130426|7231_1	0.177033	10.2853	14.71	16.2751	9.97499	18.9063	12.1228	31.9785	10.4478	8.48587	145.503	97.8075	11.234	57.1766	20.855	139.23	54.6773	389.315	374.568	173.085	106.015	60.5509	89.948	37.7447	30.9137	17.0905	54.1334	99.9164	87.5348	FALSE	FALSE	FALSE	FALSE
MMETSP0851-20130426|117638_1	0.177346	25.8561	2.74954	7.0421	1.6625	3.06229	4.1634	6.4518	8.81534	1.03909	1.61223	0	3.68617	0.183848	3.7104	5.70756	4.35242	30.5496	20.9311	7.18885	3.40486	5.89894	3.4656	4.49341	1.35586	4.32411	3.72531	2.56607	2.78441	FALSE	FALSE	FALSE	FALSE
MMETSP0851-20130426|167206_1	0.177346	13.7137	20.3466	13.1453	20.2522	19.8383	16.5312	20.0567	17.4674	11.0836	40.3057	19.2683	10.1809	36.0341	12.2827	15.0472	20.402	25.672	5.69852	21.9813	9.13122	14.2269	10.8694	13.4802	21.6938	23.4737	9.08044	22.1324	10.4415	FALSE	FALSE	FALSE	Name=Pfam:EcKinase; Dbxref=Pfam:PF02958.15; Description=ecdysteroid kinase; Ontology_term=InterPro:IPR004119; score=52.60; evalue=3.20e-14;
MMETSP0851-20130426|159997_1	0.179528	2.14277	2.47458	1.56491	1.36023	1.06514	2.44906	1.68308	18.6102	2.59771	2.8214	3.76988	3.15958	2.75771	1.66328	5.36164	92.2169	0.25672	0.547935	0.829483	0.309533	22.3813	41.7447	1.57269	19.2533	1.64728	0.698496	1.28304	2.78441	FALSE	FALSE	FALSE	FALSE
MMETSP0851-20130426|14117_1	0.179528	15.4279	18.4219	14.2407	10.7307	13.1812	7.83699	10.7998	9.79483	18.5304	6.65044	28.9024	6.14362	5.88312	12.7945	8.12894	39.1718	1.15524	1.31504	5.52988	9.90506	17.0028	16.5404	13.7049	11.6604	10.7073	7.10137	12.8304	7.65712	FALSE	FALSE	FALSE	FALSE
MMETSP0851-20130426|285_1	0.180409	65.8544	89.2225	1418.28	87.2056	637.489	713.044	649.949	670.946	1225.78	799.06	450.082	1323.69	1117.61	341.868	480.991	782.075	2176.98	827.82	170.182	68.4068	247.582	99.3997	142.217	725.929	102.955	154.484	209.135	149.14	-	-	-	FALSE
MMETSP0851-20130426|71420_1	0.182123	13.5709	13.4727	21.5958	12.6954	24.232	13.8372	15.7087	12.8965	15.9327	5.64279	14.2418	11.234	12.5016	15.3534	17.2956	5.44052	15.6599	2.95885	9.6773	2.7858	10.5834	4.56829	13.9296	12.4739	8.64822	4.65664	2.72645	7.30907	FALSE	FALSE	FALSE	FALSE
MMETSP0851-20130426|11051_1	0.182348	24.999	27.083	33.9586	30.5295	32.62	19.1027	26.9293	27.4255	14.0277	44.3362	36.4422	18.0798	36.9534	87.898	59.151	25.2984	120.787	103.56	182.21	49.061	112.774	81.9141	26.0618	22.2362	42.6233	39.1158	79.2275	82.3141	ABC-2 type transporter	ko:K05681,ko:K21396	ABC2_membrane,ABC_tran	Name=Pfam:ABC2_membrane; Dbxref=Pfam:PF01061.19; Description=abc-2 type transporter; Ontology_term=InterPro:IPR013525; score=89.30; evalue=1.60e-25;
MMETSP0851-20130426|138971_1	0.182367	47.5694	33.4069	39.2793	34.9125	34.7503	27.307	32.259	92.7244	41.7366	18.9437	33.929	29.1383	31.6218	37.104	51.7139	330.784	10.3971	7.34233	25.8522	26.9294	133.073	291.583	26.7358	50.7093	26.1506	24.4473	31.1136	20.8831	FALSE	FALSE	FALSE	FALSE
MMETSP0851-20130426|161055_1	0.182416	92.8533	65.439	68.3866	84.0317	265.487	173.393	238.576	383.141	381.518	1427.43	100.53	353.521	1101.8	97.6218	127.469	1351.97	50.0603	88.9846	63.1789	83.2644	587.812	613.726	411.597	551.836	349.223	59.0229	144.823	66.4777	fructose-bisphosphate aldolase activity	ko:K01192,ko:K01624	F_bP_aldolase	Name=Pfam:F_bP_aldolase; Dbxref=Pfam:PF01116.15; Description=fructose-bisphosphate aldolase class-ii; Ontology_term=InterPro:IPR000771; score=84.90; evalue=4.40e-24;
MMETSP0851-20130426|189458_1	0.182416	27.7131	30.7948	32.8631	31.8897	21.8355	15.4291	23.7034	24.6503	9.69814	28.8186	19.4777	20.1862	18.7525	18.8079	32.8617	19.8579	51.2156	62.355	25.0227	19.5006	30.8827	18.1156	25.8371	18.1686	27.386	15.949	20.0474	21.0571	Belongs to the peptidase S1 family	ko:K08664,ko:K09628,ko:K09630,ko:K09640	Trypsin	Name=Pfam:Trypsin; Dbxref=Pfam:PF00089.21; Description=trypsin; Ontology_term=InterPro:IPR001254; score=147.30; evalue=4.20e-43;
MMETSP0851-20130426|187400_1	0.182416	12.4281	18.9718	23.9431	18.892	18.2406	18.8578	11.6413	12.8965	7.79314	10.0764	7.74921	16.8511	18.2009	13.6901	15.0472	5.44052	64.8217	71.7795	77.6949	42.406	17.5233	31.3479	15.7269	2.9829	9.67777	36.5546	22.4531	28.7142	FALSE	FALSE	FALSE	Name=Pfam:Oligomerisation; Dbxref=Pfam:PF02410.10; Description=oligomerisation domain; Ontology_term=InterPro:IPR025656; score=46.70; evalue=2.30e-12;
MMETSP0851-20130426|8578_1	0.183194	2.99987	6.32394	9.23298	4.38295	6.12458	6.12265	3.92718	8.16236	29.7871	10.2779	1.04719	9.30319	1.65463	1.40739	6.57234	2.99229	33.7586	3.28761	5.52988	6.65496	4.51096	5.35592	7.41413	7.32166	12.9723	4.88947	6.41518	3.65454	-	-	-	FALSE
MMETSP0851-20130426|25919_1	0.183782	797.681	864.18	2731.24	708.224	2698.54	1503.72	1915.48	3560.58	5951.19	3673.86	930.114	3434.63	3834.14	1130.39	3988.2	5024.87	3205.4	2873.26	346.724	224.876	357.406	367.668	319.482	3537.45	843.613	346.687	708.877	309.591	-	-	-	FALSE
MMETSP0851-20130426|161697_1	0.183782	12.4281	21.1714	12.8323	18.1363	11.0509	9.91869	16.5503	20.2426	8.48587	12.8978	4.18876	11.4096	20.7748	28.0199	25.7705	52.7731	40.305	39.1226	76.4506	19.6553	17.8703	29.6151	12.1322	8.67753	23.4737	23.8653	36.7269	32.8908	FALSE	FALSE	FALSE	FALSE
MMETSP0851-20130426|134835_1	0.184331	19.5706	22.6837	33.8021	22.9727	20.9035	21.0619	15.849	19.4264	34.463	16.5253	147.863	10.3564	50.0066	11.8989	16.7768	16.3216	77.9144	82.4094	23.9167	19.3458	25.3307	14.0199	77.9607	50.1669	25.7387	16.5311	12.1888	10.2675	RNA-binding protein	-	-	FALSE
MMETSP0851-20130426|6272_1	0.184331	19.8563	30.5199	13.6147	21.7636	29.1583	16.5312	25.5267	13.3863	19.2231	47.5607	13.6135	23.1702	25.371	21.2388	22.3114	22.3061	41.5886	30.3556	24.3315	19.5006	20.9933	10.8694	22.0177	23.592	25.5328	20.4892	18.4436	16.3584	FALSE	FALSE	FALSE	Name=Pfam:PfkB; Dbxref=Pfam:PF00294.19; Description=pfkb family carbohydrate kinase; Ontology_term=InterPro:IPR011611; score=26.40; evalue=3.00e-06;
MMETSP0851-20130426|191039_1	0.184772	20.9991	21.1714	23.6302	22.8216	18.2406	20.5721	27.6305	20.8956	17.8376	24.1834	34.1384	12.2872	14.3401	14.9695	12.2799	25.5705	43.0005	19.0681	22.1195	13.1552	20.4728	18.5882	17.5243	23.8632	14.4137	16.8803	17.0002	12.8779	FALSE	FALSE	FALSE	FALSE
MMETSP0851-20130426|3047_1	0.185052	4.14268	3.84935	1.56491	5.4409	13.98	6.2451	3.2259	2.12221	6.23452	2.8214	0.837752	2.80851	1.47078	3.19862	1.55661	2.17621	0	0.109587	0.138247	2.47626	1.04099	2.67796	0.674012	2.16938	2.88274	1.86265	8.33973	0.348051	FALSE	FALSE	FALSE	Name=Pfam:Glyco_transf_5; Dbxref=Pfam:PF08323.6; Description=starch synthase catalytic domain; Ontology_term=InterPro:IPR013534; score=44.70; evalue=1.00e-11;
MMETSP0851-20130426|192611_1	0.185052	16.4279	20.4841	17.0575	14.3579	37.0138	66.8593	23.5631	27.752	37.4071	31.2369	13.404	45.1117	37.6888	17.2725	15.912	22.0341	54.1678	67.0672	15.4837	10.2146	13.5329	15.7527	24.9384	49.8958	21.0028	13.7371	20.2078	14.6181	FALSE	FALSE	FALSE	Name=Pfam:Zeta_toxin; Dbxref=Pfam:PF06414.7; Description=zeta toxin; Ontology_term=InterPro:IPR010488; score=64.40; evalue=6.70e-18;
MMETSP0851-20130426|51817_1	0.186755	15.1422	11.2731	8.13754	7.25454	9.5863	4.40831	8.69591	5.71365	6.06133	9.27031	2.51326	9.47873	15.2594	14.3298	12.7988	5.1685	19.3823	10.082	26.2669	5.88113	12.6654	8.03389	6.06611	4.33876	6.79503	5.8208	12.1888	14.9662	Frataxin-like domain	ko:K19054	Frataxin_Cyay	Name=Pfam:Frataxin_Cyay; Dbxref=Pfam:PF01491.11; Description=frataxin-like domain; Ontology_term=InterPro:IPR002908; score=94.20; evalue=3.40e-27;
MMETSP0851-20130426|190224_1	0.186755	8.57107	10.1733	8.76351	8.31249	12.116	10.531	7.99462	9.30509	3.46362	11.4871	18.2211	17.7287	17.2817	7.67668	12.4528	2.44824	1.2836	4.38348	6.22112	7.73833	23.9428	21.8963	18.8723	13.2875	15.8551	6.51929	20.5286	4.69869	FALSE	FALSE	FALSE	FALSE
MMETSP0851-20130426|126727_1	0.191328	7.85682	7.56123	4.53824	5.4409	7.05658	6.73491	3.2259	5.8769	4.32952	11.0841	8.37752	5.79255	11.3986	6.52518	7.95599	9.52092	0.641799	0.876696	1.38247	2.63103	6.24594	2.67796	4.04407	2.9829	5.35366	4.07456	2.72645	6.26492	FALSE	FALSE	FALSE	Name=Pfam:EF_hand_5; Dbxref=Pfam:PF13499.1; Description=ef-hand domain pair; Ontology_term=InterPro:IPR011992; score=26.40; evalue=4.90e-06;
MMETSP0851-20130426|1322_1	0.191673	14.2851	2.88702	12.0498	12.0909	3.99429	12.3678	4.76872	1.63247	5.54179	1.00764	0	6.67021	0	0.255889	5.70756	0	6.03291	2.30133	0.691235	0	0.173498	0.315054	8.31281	7.05049	1.02955	0.931327	0	0.522077	FALSE	FALSE	FALSE	FALSE
MMETSP0851-20130426|130083_1	0.191944	68.2829	43.8551	44.4435	69.3715	36.2149	63.5531	100.003	41.628	34.2898	53.2035	24.7137	24.5745	20.9586	26.1007	35.1101	38.8997	10.1404	17.5339	17.5574	21.6673	49.2735	37.3339	29.6565	52.8787	26.7683	32.3636	30.7929	39.5038	Polysaccharide biosynthesis protein	ko:K08679	Epimerase,GDP_Man_Dehyd	Name=Pfam:Epimerase; Dbxref=Pfam:PF01370.16; Description=nad dependent epimerase/dehydratase family; Ontology_term=InterPro:IPR001509; score=149.40; evalue=9.70e-44;
MMETSP0851-20130426|48407_1	0.19252	8.99962	8.66105	10.7979	8.16135	5.85829	7.71454	12.7633	7.83586	13.6813	18.1376	19.0589	25.1011	82.5476	7.67668	4.49686	12.5132	33.5019	12.3833	13.1335	9.59552	17.1763	7.87636	15.5023	8.67753	17.5023	11.6416	6.41518	11.3117	FALSE	FALSE	FALSE	Name=Pfam:TPR_12; Dbxref=Pfam:PF13424.1; Description=tetratricopeptide repeat; score=42.30; evalue=4.90e-11;
MMETSP0851-20130426|136793_1	0.19252	18.7135	24.6084	15.6491	21.7636	18.5069	17.6332	18.3736	10.6111	20.7817	27.0048	2.09438	14.0426	16.3624	19.0638	24.0409	20.1299	59.944	118.792	22.6725	13.3099	20.2993	12.7597	45.8328	39.8624	16.8846	13.3878	28.0664	11.1376	FALSE	FALSE	FALSE	Name=Pfam:LRR_1; Dbxref=Pfam:PF00560.28; Description=leucine rich repeat; Ontology_term=InterPro:IPR001611; score=36.30; evalue=1.60e-09;
MMETSP0851-20130426|113488_1	0.193439	16.4279	13.7477	14.5537	16.0204	24.3652	13.1025	16.971	13.3863	9.52495	8.26266	12.5663	24.3989	7.7216	13.5621	16.2579	3.26431	2.31048	3.50678	8.01833	14.3933	17.5233	6.61614	10.7842	9.76222	18.5319	15.1341	11.8681	12.8779	FALSE	FALSE	FALSE	FALSE
MMETSP0851-20130426|153055_1	0.193497	0.857107	2.88702	4.22526	3.17386	1.33143	2.32661	0.561026	0.489741	6.75406	0	0	1.40426	2.75771	4.35012	68.1448	63.9261	7.31651	6.24646	1.52072	0.928599	1.04099	0.157527	0.898683	1.89821	7.20685	0.58208	0.962277	0.348051	FALSE	FALSE	FALSE	FALSE
MMETSP0851-20130426|108510_1	0.193497	2.57132	4.94917	1.25193	3.02272	2.26343	4.28585	4.06744	58.6057	5.36861	3.02293	0	4.03724	6.61851	4.47807	14.1824	212.452	1.02688	0.219174	0.138247	1.54767	66.9703	59.0727	2.24671	46.0994	5.35366	1.39699	1.60379	1.56623	FALSE	FALSE	FALSE	FALSE
MMETSP0851-20130426|127136_1	0.198515	8.99962	11.2731	9.70245	7.85908	15.4446	6.61246	7.57385	18.1204	15.7595	6.65044	4.60764	20.7128	5.33158	6.14135	9.16668	1.63216	0.12836	3.50678	3.17968	8.51216	9.36891	4.41076	7.86347	38.5065	15.6492	7.45062	8.17935	3.82856	FALSE	FALSE	FALSE	FALSE
MMETSP0851-20130426|167852_1	0.198515	12.7138	15.1225	12.2063	17.2295	27.028	13.5923	16.971	7.99911	6.58088	21.5635	3.35101	13.867	8.82469	48.3631	33.5535	45.4284	546.428	130.737	200.182	192.375	43.5481	122.871	24.4891	3.79642	17.0905	121.073	96.7088	194.909	FALSE	FALSE	FALSE	FALSE
MMETSP0851-20130426|44695_1	0.200783	1.14281	3.16197	3.5993	0.906817	2.796	1.34698	2.24411	3.1017	1.21227	0.403057	2.30382	2.45745	0.183848	0.127945	1.90252	0.544052	9.24191	45.0403	6.35937	2.47626	1.56148	1.41774	1.12335	0	0.61773	1.51341	2.24531	1.3922	FALSE	FALSE	FALSE	FALSE
MMETSP0851-20130426|142153_1	0.205072	47.998	38.2186	31.9242	38.9931	31.2886	59.5121	37.0277	29.711	19.9158	24.3849	22.4099	26.5053	12.8693	25.2051	28.5378	14.9614	46.3379	26.3009	37.465	23.3697	20.1258	22.3689	36.6213	44.7435	22.0324	25.9608	19.4059	25.2337	RIB43A-like with coiled-coils protein 2	-	RIB43A	Name=Pfam:RIB43A; Dbxref=Pfam:PF05914.7; Description=rib43a; Ontology_term=InterPro:IPR008805; score=233.30; evalue=3.10e-69;
MMETSP0851-20130426|150117_1	0.205072	2.99987	1.23729	3.44281	2.26704	2.66286	0.367359	2.80513	4.57092	0.173181	1.00764	3.14157	3.68617	4.2285	3.19862	1.55661	1.0881	16.8151	22.027	4.7004	2.63103	1.38799	0	0.898683	0.271173	2.47092	1.74624	4.33025	1.3922	FALSE	FALSE	FALSE	FALSE
MMETSP0851-20130426|133337_1	0.205072	2.85702	2.47458	1.56491	2.56931	0.798858	0.857171	2.52462	1.79572	5.88815	2.61987	0	3.68617	0	1.40739	0.345912	2.99229	0	0.767109	0	0.154767	1.21449	4.56829	10.5595	0	0.82364	3.60889	0	1.04415	FALSE	FALSE	FALSE	FALSE
MMETSP0851-20130426|193465_1	0.205072	23.5704	28.4577	24.4126	32.7965	27.5606	27.4295	21.0385	111.988	18.7035	27.4079	10.2625	34.4043	36.9534	37.6157	40.9906	360.707	9.11355	4.71224	18.2486	20.1196	169.334	114.365	32.1279	36.3371	22.6501	25.0294	30.4721	21.9272	FALSE	FALSE	FALSE	Name=Pfam:Ion_trans; Dbxref=Pfam:PF00520.26; Description=ion transport protein; Ontology_term=InterPro:IPR005821; score=66.90; evalue=1.30e-18;
MMETSP0851-20130426|157909_1	0.205086	15.1422	15.8098	10.0154	16.7761	10.7846	11.1432	18.0931	10.7743	9.87132	5.23974	10.8908	8.07447	3.12541	6.65313	8.82077	17.9537	2.18212	3.06844	5.80638	10.2146	12.1449	13.0748	6.51545	9.49104	16.6787	8.0327	7.85859	12.0078	FALSE	FALSE	FALSE	FALSE
MMETSP0851-20130426|96597_1	0.205086	4.57124	5.63655	5.16421	4.68522	3.06229	3.06132	4.2077	4.73417	0	6.04585	3.56045	0.702128	2.39002	3.83834	10.7233	26.3865	0	2.19174	0.96773	1.23813	2.77597	21.4237	3.14539	1.89821	5.76548	2.32832	3.36797	0.870128	FALSE	FALSE	FALSE	FALSE
MMETSP0851-20130426|192475_1	0.207198	14.2851	17.597	32.2372	17.5318	67.9029	12.98	18.0931	44.893	16.9717	32.8491	25.9703	62.4894	47.6165	12.2827	14.7013	35.3634	64.8217	6.90398	17.1426	17.7981	19.4318	12.9172	15.9516	20.8803	29.651	15.8326	18.2833	10.6156	Polysaccharide biosynthesis C-terminal domain	-	MatE	Name=Pfam:MatE; Dbxref=Pfam:PF01554.13; Description=mate; Ontology_term=InterPro:IPR002528; score=57.40; evalue=1.10e-15;
MMETSP0851-20130426|113942_1	0.209085	4.71409	4.81169	4.38175	7.85908	3.86115	4.65321	3.36616	13.5495	3.11726	0.201528	2.30382	2.63298	4.2285	5.88546	2.42139	27.4746	0	1.31504	2.3502	4.79776	14.7474	12.2871	2.92072	4.88111	7.82458	2.67757	2.24531	3.30648	FALSE	FALSE	FALSE	FALSE
MMETSP0851-20130426|61552_1	0.209085	7.85682	14.1601	10.1719	9.52158	6.92344	10.0411	12.6231	18.7734	7.79314	2.21681	0.209438	1.93085	7.35391	8.18846	12.1069	29.6509	3.46571	3.61637	4.7004	7.73833	13.8799	27.4097	13.9296	8.40635	10.2955	10.5938	11.0662	10.6156	FALSE	FALSE	FALSE	FALSE
MMETSP0851-20130426|4432_1	0.210183	9.71388	26.2581	11.8933	10.7307	17.4417	13.9596	9.95822	7.34612	3.80998	15.1146	25.5514	10.1809	33.2764	12.7945	10.7233	13.6013	85.7443	120.217	26.2669	25.846	8.32792	24.4167	10.7842	6.77932	12.3546	24.6802	25.8211	22.1012	Methyltransferase domain	-	Methyltransf_11	Name=Pfam:Methyltransf_23; Dbxref=Pfam:PF13489.1; Description=methyltransferase domain; score=32.20; evalue=6.70e-08;
MMETSP0851-20130426|157297_1	0.210183	6.71401	8.936	6.25965	8.01022	10.7846	15.4291	6.87257	9.14184	3.11726	12.4948	1.25663	5.26596	10.4793	7.1649	7.26416	19.8579	28.2392	6.35605	17.0044	6.03589	15.0944	9.13658	9.2115	1.08469	9.47186	6.51929	6.57556	8.00517	FALSE	FALSE	FALSE	FALSE
MMETSP0851-20130426|89416_1	0.210183	17.5707	26.3956	22.5347	20.2522	20.504	30.7357	14.8672	45.7092	7.44678	13.5024	18.8494	18.6064	20.5909	14.4578	26.2893	238.023	3.59407	6.02728	9.53905	8.97646	77.2067	200.217	17.075	36.6083	18.5319	8.73119	15.7172	9.22335	FALSE	FALSE	FALSE	FALSE
MMETSP0851-20130426|33740_1	0.210183	1.85707	2.88702	1.56491	2.87159	5.05944	3.30623	10.94	4.73417	20.2622	0	3.97932	2.63298	4.78004	1.91917	6.91825	2.17621	5.64783	1.53422	5.94463	1.23813	0.867491	0.472582	2.02204	5.15228	17.0905	1.86265	2.88683	0.522077	FALSE	FALSE	FALSE	FALSE
MMETSP0851-20130426|81636_1	0.210183	4.99979	3.5744	5.00772	0.906817	0.399429	0.122453	0.981796	1.30598	9.69814	10.681	0.209438	0.702128	2.57387	0.639724	4.49686	0.272026	13.7345	27.6159	4.56215	0.928599	0.346997	1.57527	1.12335	1.35586	2.47092	3.25965	0	0.174026	FALSE	FALSE	FALSE	FALSE
MMETSP0851-20130426|9221_1	0.210275	9.99958	16.7722	37.0884	13.4511	56.3195	16.4087	26.228	23.9973	17.4913	48.5683	27.0175	57.2234	117.479	15.2254	15.739	51.685	115.909	23.7804	11.4745	20.2744	25.8512	28.0398	10.3348	22.5073	9.47186	17.5788	27.1041	14.0961	Mitochondrial inner membrane protease subunit	-	-	Name=Pfam:Peptidase_S24; Dbxref=Pfam:PF00717.18; Description=peptidase s24-like; Ontology_term=InterPro:IPR019759; score=50.60; evalue=9.70e-14;
MMETSP0851-20130426|61562_1	0.210275	35.2842	38.3561	36.7754	49.2704	38.212	30.1234	36.7472	16.6512	11.7763	46.3515	28.9024	27.0319	18.3848	39.279	35.2831	25.0264	89.7235	201.202	118.478	42.406	43.7216	46.1555	40.4407	31.1849	38.917	67.6377	36.2458	72.5686	FALSE	FALSE	FALSE	Name=Pfam:Mitofilin; Dbxref=Pfam:PF09731.4; Description=mitochondrial inner membrane protein; Ontology_term=InterPro:IPR019133; score=126.40; evalue=1.30e-36;
MMETSP0851-20130426|89091_1	0.210275	1.57136	0.687385	2.50386	2.41818	0	0.612265	0	15.835	0	0.201528	0.837752	1.75532	1.47078	0.895613	2.24843	85.9603	0	0	0.138247	0.773833	20.6463	28.0398	0	4.88111	0.82364	0.465664	1.76417	0.696102	FALSE	FALSE	FALSE	FALSE
MMETSP0851-20130426|189140_1	0.212019	73.5684	88.1227	69.1691	81.3113	75.4921	57.6754	94.9537	82.603	55.4179	163.238	97.5981	76.1809	85.1215	88.1539	153.585	150.975	121.942	173.586	211.795	95.8005	81.7177	116.255	76.6127	51.5228	73.5098	83.4702	128.945	98.4984	FALSE	FALSE	FALSE	Name=Pfam:Pkinase; Dbxref=Pfam:PF00069.20; Description=protein kinase domain; Ontology_term=InterPro:IPR000719; score=134.80; evalue=2.60e-39;
MMETSP0851-20130426|2646_1	0.212128	3.85698	2.33711	2.97333	3.62727	1.59772	6.85737	2.66487	0.979483	1.90499	0	16.9645	4.56383	13.4209	0.639724	0.518869	0	2.69556	0	3.59442	0.928599	0.173498	0	7.6388	0.271173	7.00094	0.116416	0.160379	1.21818	FALSE	FALSE	FALSE	FALSE
MMETSP0851-20130426|122321_1	0.215783	4.57124	6.04899	4.06877	4.23181	10.3852	3.42868	4.34795	4.24443	2.42453	14.9131	0.628314	4.3883	1.83848	6.52518	7.09121	2.72026	4.87767	1.42463	12.0275	1.54767	5.03145	0.630109	2.24671	0.271173	5.97139	1.86265	2.56607	1.21818	FALSE	FALSE	FALSE	FALSE
MMETSP0851-20130426|835_1	0.217181	26.4275	33.2694	31.6112	25.542	22.5012	25.2253	23.1423	28.5682	10.0445	40.7087	18.4305	29.8404	36.9534	36.8481	42.8931	36.9956	75.989	53.0401	62.6259	42.0965	40.2516	38.7517	22.6917	22.5073	30.4747	39.8142	44.2647	50.4674	FALSE	FALSE	FALSE	Name=Pfam:HSF_DNA-bind; Dbxref=Pfam:PF00447.12; Description=hsf-type dna-binding; Ontology_term=InterPro:IPR000232; score=37.90; evalue=1.40e-09;
MMETSP0851-20130426|171130_1	0.217507	14.7137	25.0208	23.0042	15.4159	29.2915	16.8985	17.3918	25.6298	24.7649	17.533	19.2683	31.2447	29.0479	19.3197	12.9717	11.4251	82.407	66.6289	73.5475	50.6087	24.9838	29.9302	12.3569	22.7785	27.5919	37.0203	42.1798	53.4258	FALSE	FALSE	FALSE	FALSE
MMETSP0851-20130426|191406_1	0.220776	49.8551	69.7008	54.1459	65.2908	67.7698	43.8382	49.9313	37.5468	65.6356	230.347	77.0732	46.3404	51.4773	46.8278	92.7045	88.9526	73.6785	133.587	67.4646	159.1	131.338	501.567	74.1413	39.8624	63.6262	212.925	129.747	181.683	-	-	-	FALSE
MMETSP0851-20130426|178132_1	0.222785	8.14252	4.67422	7.0421	3.7784	2.39657	9.79624	2.38436	8.16236	2.59771	3.82904	0.209438	1.05319	11.2147	6.26929	6.22642	0.816078	0	1.86298	1.79721	3.2501	6.41944	3.78065	6.29078	1.08469	2.26501	6.98496	2.24531	10.2675	-	-	PAN_4	FALSE
MMETSP0851-20130426|190522_1	0.222785	65.1401	65.5765	54.4589	49.8749	70.6989	57.0631	71.5308	63.1766	61.6524	109.631	73.5127	58.4521	104.793	77.4066	73.3334	64.4702	139.784	103.45	179.721	75.0618	68.7053	93.5712	90.9916	16.2704	62.8025	74.3898	100.558	75.5271	Cathepsin propeptide inhibitor domain (I29)	-	-	Name=Pfam:Inhibitor_I29; Dbxref=Pfam:PF08246.7; Description=cathepsin propeptide inhibitor domain (i29); Ontology_term=InterPro:IPR013201; score=38.20; evalue=1.20e-09;
MMETSP0851-20130426|226_1	0.222785	57.4262	87.7103	1784.94	66.4999	507.541	279.193	376.729	491.537	770.829	674.516	310.597	1256.81	967.039	206.631	519.56	807.102	1327.11	374.678	92.902	41.6322	98.7205	70.8872	62.2338	348.457	78.2458	71.4794	170.965	48.031	COG NOG14600 non supervised orthologous group	-	-	FALSE
MMETSP0851-20130426|33683_1	0.222785	1.14281	1.51225	1.7214	1.05795	1.06514	1.71434	2.24411	1.46922	30.3067	2.21681	1.25663	0.175532	0	1.66328	0.172956	2.44824	0	0	0	0.309533	2.25548	1.41774	0.224671	7.59284	10.7073	0.232832	2.72645	1.21818	FALSE	FALSE	FALSE	FALSE
MMETSP0851-20130426|5358_1	0.222785	13.9994	18.0095	15.6491	15.7182	14.3794	16.4087	11.3608	9.46833	9.69814	25.9972	11.938	11.7606	12.1339	8.44435	19.0252	27.7467	26.057	36.2733	12.4422	13.7742	7.98092	6.45862	15.0529	11.9316	14.2078	10.4774	13.7926	5.22077	FALSE	FALSE	FALSE	Name=Pfam:DUF285; Dbxref=Pfam:PF03382.9; Description=mycoplasma protein of unknown function duf285; Ontology_term=InterPro:IPR005046; score=465.30; evalue=3.50e-142;
MMETSP0851-20130426|185322_1	0.222785	7.85682	14.2976	7.19859	13.3	10.252	15.1842	15.1477	8.6521	0	7.65808	3.56045	11.234	6.80236	7.03696	8.12894	34.2753	0.25672	1.86298	3.17968	2.63103	26.7187	14.1774	10.1102	14.101	9.26595	5.23872	7.53784	7.13505	FALSE	FALSE	FALSE	Name=Pfam:MIF4G; Dbxref=Pfam:PF02854.14; Description=mif4g domain; Ontology_term=InterPro:IPR003890; score=53.60; evalue=1.70e-14;
MMETSP0851-20130426|148610_1	0.222785	1.85707	1.7872	4.53824	2.56931	1.73086	5.26548	2.66487	4.40767	5.36861	3.22445	0	1.75532	0.183848	4.60601	2.24843	0	0.770159	0	12.304	0.309533	1.38799	0	3.8194	4.60994	0.82364	0.232832	1.92455	1.3922	FALSE	FALSE	FALSE	FALSE
MMETSP0851-20130426|50589_1	0.226516	12.2852	7.42375	11.1109	9.82385	6.39087	6.97982	7.57385	4.08118	5.02225	14.51	4.18876	2.98404	10.6632	4.35012	2.59434	7.61673	1.02688	3.3972	3.73267	6.96449	4.51096	7.08872	7.41413	2.44055	5.35366	8.49836	10.4247	5.91687	-	-	-	FALSE
MMETSP0851-20130426|13255_1	0.227202	0.571405	0.962339	2.34737	0.453408	1.73086	0.612265	2.24411	3.42819	4.50271	0	3.14157	2.10638	13.237	2.43095	10.0315	1.90418	0	0	0.138247	0.773833	4.68445	2.83549	3.14539	5.9658	1.85319	0.931327	4.81138	0.522077	FALSE	FALSE	FALSE	FALSE
MMETSP0851-20130426|155833_1	0.228261	3.57128	3.71188	5.16421	5.74317	7.05658	2.81642	3.50641	8.3256	8.13951	22.7727	5.02651	6.84575	7.17006	2.17506	7.95599	25.8425	0	1.86298	1.38247	5.10729	8.32792	10.5543	7.41413	0	3.08865	1.16416	3.36797	2.78441	FALSE	FALSE	FALSE	FALSE
MMETSP0851-20130426|5468_1	0.228762	6.71401	3.71188	15.0232	10.7307	36.7475	61.2265	34.3629	71.5022	204.873	36.4766	30.9968	90.0479	68.5752	11.7709	78.868	39.9878	83.819	37.9171	3.04144	1.23813	3.81696	9.13658	16.1763	43.1165	7.61867	4.54022	10.585	5.22077	FALSE	FALSE	FALSE	FALSE
MMETSP0851-20130426|103811_1	0.229752	32.2844	53.2036	52.4245	42.167	68.1692	47.0219	52.7365	48.6476	40.6975	58.2417	64.7163	46.1649	43.2042	40.9423	48.9466	56.3094	282.52	149.805	184.422	159.41	112.08	179.739	71.8946	63.1832	50.8597	96.7416	102.162	110.506	calcium-dependent cysteine-type endopeptidase activity	-	Peptidase_C2,VHL	Name=Pfam:Peptidase_C2; Dbxref=Pfam:PF00648.16; Description=calpain family cysteine protease; Ontology_term=InterPro:IPR001300; score=121.80; evalue=2.50e-35;
MMETSP0851-20130426|66954_1	0.229752	11.4281	12.098	9.70245	8.01022	7.98858	5.38793	7.29334	8.81534	4.15634	15.5177	1.6755	3.33511	9.37623	10.6194	9.8585	5.98458	21.8212	6.35605	30.2761	5.10729	8.67491	11.8145	3.8194	17.6262	9.67777	7.45062	8.01897	18.7948	FALSE	FALSE	FALSE	FALSE
MMETSP0851-20130426|152326_1	0.229752	1.71421	4.53674	0.312982	5.13863	2.26343	4.28585	1.40257	1.30598	0.346362	0	4.81707	0.702128	0.367695	1.91917	1.90252	0.544052	10.9106	0.109587	3.45618	0.619066	1.56148	0.630109	0.674012	0	1.85319	0.931327	1.76417	2.78441	FALSE	FALSE	FALSE	FALSE
MMETSP0851-20130426|182009_1	0.229752	5.14264	3.43692	8.45052	5.74317	23.4332	1.83679	8.41539	10.4478	5.71497	3.02293	0.628314	9.12766	12.3178	3.7104	2.59434	5.1685	32.8601	99.7242	9.95379	6.19066	3.29647	1.89033	8.76215	3.79642	10.5014	4.65664	14.4342	2.95843	FALSE	FALSE	FALSE	FALSE
MMETSP0851-20130426|66498_1	0.232695	105.424	65.0266	69.3256	89.0192	102.121	65.5123	52.7365	47.0152	119.149	58.6448	50.0557	65.2979	40.2626	62.6929	57.4215	38.0837	98.837	135.23	57.5108	26.0008	35.7406	43.635	42.2381	116.062	95.5422	36.3218	50.8403	37.5895	acetyl-CoA carboxylase	ko:K11262	ACC_central,Biotin_carb_C,Biotin_carb_N,Biotin_lipoyl,CPSase_L_D2,Carboxyl_trans	Name=Pfam:Carboxyl_trans; Dbxref=Pfam:PF01039.17; Description=carboxyl transferase domain; Ontology_term=InterPro:IPR000022; score=439.40; evalue=1.10e-131;
MMETSP0851-20130426|10311_1	0.232695	9.42818	6.59889	7.98105	15.1136	7.05658	14.9393	5.18949	8.3256	6.4077	6.24738	4.3982	1.05319	9.00853	6.0134	3.45912	1.90418	17.2002	9.20531	2.62669	2.01196	5.55194	1.57527	5.3921	17.3551	3.70638	2.9104	2.40569	3.65454	FALSE	FALSE	FALSE	FALSE
MMETSP0851-20130426|9910_1	0.233379	195.135	149.85	231.92	203.278	133.542	210.129	252.742	253.36	222.538	8.46419	238.131	282.958	85.673	186.288	193.884	28.5627	127.333	45.6978	197.555	58.0374	127.868	73.7227	155.472	243.784	132.812	91.6193	95.4258	110.506	Tubulin is the major constituent of microtubules. It binds two moles of GTP, one at an exchangeable site on the beta chain and one at a non-exchangeable site on the alpha chain	ko:K07375	Tubulin,Tubulin_C	Name=Pfam:Tubulin_C; Dbxref=Pfam:PF03953.12; Description=tubulin c-terminal domain; Ontology_term=InterPro:IPR018316; score=59.50; evalue=3.20e-16;
MMETSP0851-20130426|67687_1	0.234469	7.57111	10.4482	14.3972	6.95226	41.0081	17.6332	21.319	71.992	35.3289	79.8052	340.546	87.766	72.8037	7.29285	27.846	38.6277	101.918	13.1504	8.70957	5.72636	1.38799	0.787636	9.43617	55.3192	5.55957	4.07456	11.5473	22.6233	FALSE	FALSE	FALSE	FALSE
MMETSP0851-20130426|58896_1	0.236317	31.4273	20.0716	24.2561	29.4716	35.1498	45.7974	19.0749	26.7725	19.2231	42.321	19.0589	21.5904	17.6494	13.818	22.1384	14.4174	25.0302	7.99985	23.2255	14.5481	12.3184	8.97905	14.6036	12.7451	16.6787	10.7103	11.8681	17.0545	FALSE	FALSE	FALSE	FALSE
MMETSP0851-20130426|172897_1	0.236584	7.14256	14.4351	14.3972	16.1716	4.92629	13.9596	13.7451	8.81534	3.46362	3.42598	9.00583	6.84575	13.4209	8.44435	5.70756	10.065	1.2836	3.83554	4.28566	4.48823	10.0629	11.4995	7.86347	7.32166	10.0896	7.3342	12.8304	7.13505	Alpha beta superfamily hydrolase	-	Abhydrolase_6,Hydrolase_4	Name=Pfam:Abhydrolase_5; Dbxref=Pfam:PF12695.2; Description=alpha/beta hydrolase family; score=62.40; evalue=3.40e-17;
MMETSP0851-20130426|14050_1	0.236584	3.28558	8.936	8.92	8.91703	7.05658	6.61246	4.62847	5.06066	4.15634	17.1299	6.49258	2.63298	2.02232	10.3635	8.47485	15.7775	2.43884	21.5886	4.83865	12.3813	8.15442	17.328	4.49341	0.271173	3.50047	13.2714	8.66049	18.9688	DoxX	-	DoxX	Name=Pfam:DoxX; Dbxref=Pfam:PF07681.7; Description=doxx; Ontology_term=InterPro:IPR011637; score=48.90; evalue=5.60e-13;
MMETSP0851-20130426|191279_1	0.236974	45.2838	57.6028	41.7831	41.109	45.9343	36.8583	45.5834	50.2801	32.0385	20.5559	19.4777	28.9628	36.9534	28.9155	32.5158	85.4162	14.1196	15.9997	21.843	37.4535	52.223	38.1216	73.018	30.3713	45.712	37.8352	53.8875	20.535	FALSE	FALSE	FALSE	FALSE
MMETSP0851-20130426|19049_1	0.237579	8.99962	3.98683	9.54596	9.37044	2.39657	3.18378	3.50641	4.73417	4.15634	2.01528	6.91145	2.10638	12.6855	1.66328	2.94026	1.90418	0.898519	0.657522	1.38247	1.70243	18.7378	2.52044	4.26874	5.42345	4.94184	2.2119	7.53784	5.74284	Type IV pili methyl-accepting chemotaxis transducer N-term	-	PilJ	Name=Pfam:PilJ; Dbxref=Pfam:PF13675.1; Description=type iv pili methyl-accepting chemotaxis transducer n-term; score=60.40; evalue=1.60e-16;
MMETSP0851-20130426|6277_1	0.239993	48.4266	37.9436	51.0161	50.3283	32.0875	43.1034	53.017	45.0562	52.3007	25.3926	25.342	27.2075	29.2318	49.6426	48.0818	11.6971	39.6632	10.1916	83.2248	22.5959	41.6396	17.328	32.8019	81.8942	37.8874	30.9666	27.7456	45.2466	cellular component assembly	ko:K11447,ko:K16531	TPR_1,TPR_12,TPR_16,TPR_2,TPR_7,TPR_8	Name=Pfam:TPR_11; Dbxref=Pfam:PF13414.1; Description=tpr repeat; score=139.50; evalue=1.70e-41;
MMETSP0851-20130426|7863_1	0.239993	40.284	48.9418	33.9586	32.9477	44.4698	40.4095	41.7965	43.9135	43.2952	79.8052	77.2826	42.3032	78.8706	171.19	183.161	147.438	252.099	254.242	350.042	54.323	113.988	160.363	68.7492	44.7435	64.4498	50.1753	305.683	137.654	FALSE	FALSE	FALSE	Name=Pfam:Cu2_monoox_C; Dbxref=Pfam:PF03712.10; Description=copper type ii ascorbate-dependent monooxygenase c-terminal domain; score=55.30; evalue=4.00e-15;
MMETSP0851-20130426|9349_1	0.241058	8.99962	7.69871	9.85894	9.67271	9.18687	4.40831	5.47001	7.83586	1.21227	5.84432	9.84359	8.25	27.761	14.5857	28.3648	7.07268	60.8425	35.1774	36.2207	13.3099	16.1353	5.82851	6.06611	9.49104	2.88274	21.8862	43.1421	12.7039	Putative GTP-ase activating proteins for the small GTPase, ARF	-	ArfGap	Name=Pfam:ArfGap; Dbxref=Pfam:PF01412.13; Description=putative gtpase activating protein for arf; Ontology_term=InterPro:IPR001164; score=108.20; evalue=1.80e-31;
MMETSP0851-20130426|185025_1	0.244975	2.28562	5.22412	4.53824	6.49886	2.796	2.20415	3.36616	3.75468	0.519543	0.806114	6.91145	3.33511	0.367695	3.58245	6.39938	0.544052	0.25672	0.438348	0.829483	1.70243	4.16396	2.20538	0.898683	2.9829	2.0591	2.56115	5.29252	2.78441	tRNA methyltransferase complex GCD14 subunit	ko:K07442	GCD14	Name=Pfam:GCD14; Dbxref=Pfam:PF08704.5; Description=trna methyltransferase complex gcd14 subunit; Ontology_term=InterPro:IPR014816; score=83.60; evalue=1.10e-23;
MMETSP0851-20130426|82502_1	0.244975	4.14268	3.29945	3.75579	3.17386	4.39372	6.0002	4.90898	3.59144	2.07817	1.61223	5.44539	3.8617	3.30926	3.19862	10.0315	7.34471	34.0153	55.7798	13.8247	11.4527	15.0944	6.30109	4.49341	0.271173	8.64822	7.21779	4.16987	4.17661	FALSE	FALSE	FALSE	FALSE
MMETSP0851-20130426|2476_1	0.244975	20.9991	20.8965	22.6912	19.1943	46.6001	31.4704	30.2954	14.0393	13.1618	12.8978	10.4719	44.0585	27.0256	17.2725	14.5283	13.0573	45.0543	5.26018	11.8893	9.75029	16.1353	8.82152	16.8503	3.52524	17.7083	9.19686	13.4719	16.7064	FALSE	FALSE	FALSE	Name=Pfam:TPR_12; Dbxref=Pfam:PF13424.1; Description=tetratricopeptide repeat; score=61.80; evalue=3.80e-17;
MMETSP0851-20130426|161358_1	0.244975	17.5707	10.4482	14.0842	12.8466	14.5126	11.5106	15.9892	13.5495	19.9158	12.8978	24.9231	11.9362	28.4964	6.52518	4.32391	27.7467	58.0186	42.191	15.4837	10.9884	23.5958	26.4646	13.2556	14.3722	28.2097	8.84761	12.0285	10.0935	FALSE	FALSE	FALSE	FALSE
MMETSP0851-20130426|46093_1	0.247487	3.28558	6.87385	6.57263	3.325	3.86115	7.10227	2.24411	1.46922	2.59771	8.46419	15.4984	9.65426	0.183848	3.19862	2.94026	5.71255	0	4.71224	1.79721	4.33346	3.99046	3.62313	13.9296	11.3893	13.5901	5.35513	13.1511	1.91428	FALSE	FALSE	FALSE	FALSE
MMETSP0851-20130426|61358_1	0.247487	21.2848	24.1959	22.6912	29.925	34.0846	19.2251	25.3864	23.1811	7.10042	21.7651	11.3097	20.1862	13.6047	24.9492	30.2673	13.6013	40.4333	49.8621	67.1881	34.3582	27.0657	24.8893	15.7269	11.6604	17.5023	37.6023	28.3872	17.7506	FALSE	FALSE	FALSE	Name=Pfam:IBR; Dbxref=Pfam:PF01485.16; Description=ibr domain; Ontology_term=InterPro:IPR002867; score=25.70; evalue=7.10e-06;
MMETSP0851-20130426|192436_1	0.250513	21.9991	38.4935	33.3326	29.925	35.9486	18.8578	37.8693	29.5477	13.3349	32.2445	10.6813	50.2021	31.4379	29.6832	49.2925	44.0682	98.1952	74.6287	49.6307	37.6083	37.8226	38.1216	31.2292	26.8461	36.652	36.4382	38.3307	30.9765	Trypsin-like peptidase domain	-	LRR_8,Trypsin_2	Name=Pfam:Trypsin_2; Dbxref=Pfam:PF13365.1; Description=trypsin-like peptidase domain; score=44.30; evalue=1.30e-11;
MMETSP0851-20130426|13750_1	0.25324	17.285	16.0848	8.13754	21.0079	23.4332	14.4495	16.41	24.1606	6.06133	58.4432	6.49258	15.4468	13.9724	15.0975	18.1604	25.5705	4.36423	6.57522	7.3271	14.7028	23.9428	19.5334	13.2556	17.8974	14.8255	12.4565	17.4814	10.6156	Catalyzes the reduction of 1-pyrroline-5-carboxylate (PCA) to L-proline	ko:K00286	F420_oxidored,P5CR_dimer	Name=Pfam:F420_oxidored; Dbxref=Pfam:PF03807.12; Description=nadp oxidoreductase coenzyme f420-dependent; Ontology_term=InterPro:IPR004455; score=47.50; evalue=1.60e-12;
MMETSP0851-20130426|76929_1	0.25324	32.2844	34.9191	34.5845	37.0284	54.9881	43.4708	47.2665	31.017	30.653	60.8616	121.683	54.9415	75.7452	44.3968	49.6384	27.4746	182.656	73.9712	73.271	49.3705	36.9551	93.5712	66.2778	82.7077	72.6862	57.6259	66.3971	54.644	tyrosine-tRNA ligase activity	ko:K01866	tRNA-synt_1b,tRNA_bind	Name=Pfam:tRNA-synt_1b; Dbxref=Pfam:PF00579.20; Description=trna synthetases class i (w and y); Ontology_term=InterPro:IPR002305; score=158.60; evalue=1.60e-46;
MMETSP0851-20130426|107250_1	0.25324	5.8569	2.33711	5.47719	2.72045	2.66286	0.979624	1.40257	2.93845	3.6368	0.806114	0.628314	3.33511	2.94156	1.1515	3.28617	8.16078	0.12836	0.438348	0	0.309533	5.03145	5.98603	1.34802	0	4.1182	0.698496	2.08493	1.21818	FALSE	FALSE	FALSE	Name=Pfam:Kinesin; Dbxref=Pfam:PF00225.18; Description=kinesin motor domain; Ontology_term=InterPro:IPR001752; score=33.30; evalue=1.80e-08;
MMETSP0851-20130426|120393_1	0.25324	2.71417	5.3616	4.85123	1.81363	6.65715	4.77567	6.03103	3.59144	5.19543	0.201528	0	1.57979	2.94156	3.58245	1.90252	2.17621	5.13439	0.547935	4.42391	2.16673	1.38799	0.787636	5.61677	4.06759	1.44137	0.465664	1.76417	1.74026	FALSE	FALSE	FALSE	Name=Pfam:AP2; Dbxref=Pfam:PF00847.15; Description=ap2 domain; Ontology_term=InterPro:IPR001471; score=28.60; evalue=1.00e-06;
MMETSP0851-20130426|158408_1	0.254554	3.14273	2.06215	1.09544	1.05795	3.46172	0.734718	0.981796	12.0803	0	3.02293	0.209438	2.63298	1.83848	1.66328	3.28617	10.609	0.12836	0.219174	0.138247	1.54767	3.99046	8.03389	3.14539	8.40635	2.26501	1.51341	2.40569	0.522077	-	-	-	FALSE
MMETSP0851-20130426|135183_1	0.254554	13.2852	11.9605	11.8933	12.3932	10.9177	8.3268	7.15308	4.89741	3.80998	8.66572	15.4984	4.73936	9.92777	10.2356	11.934	3.26431	0.385079	3.28761	3.59442	6.19066	4.51096	4.09571	10.7842	3.52524	6.1773	5.93721	15.8776	6.96102	negative regulation of lipoprotein oxidation	ko:K03098	Lipocalin_2	FALSE
MMETSP0851-20130426|143424_1	0.254554	0.428554	5.22412	0.938947	2.56931	1.864	0.734718	1.68308	0.489741	0.173181	1.81376	9.42471	1.05319	3.4931	5.50162	4.84277	1.36013	31.9616	20.7119	3.73267	2.47626	2.77597	6.30109	2.47138	0	2.47092	3.02681	3.04721	2.95843	FALSE	FALSE	FALSE	FALSE
MMETSP0851-20130426|106650_1	0.254554	0.857107	1.37477	3.12982	1.81363	0.133143	0.734718	3.64667	3.75468	0.692724	0	0	1.57979	0	2.68684	1.55661	0.544052	11.6807	2.30133	4.7004	0.309533	1.04099	1.26022	1.79737	0.271173	2.67683	1.86265	2.88683	1.56623	FALSE	FALSE	FALSE	FALSE
MMETSP0851-20130426|194340_1	0.254554	23.999	20.0716	21.1263	28.867	22.1017	22.4089	20.3372	25.4666	15.4131	21.362	13.404	19.6596	11.3986	19.9594	20.5818	7.07268	25.4152	6.02728	21.0136	14.2385	19.6053	6.9312	13.2556	23.0497	15.0314	15.7162	11.5473	12.3558	FALSE	FALSE	FALSE	FALSE
MMETSP0851-20130426|156146_1	0.254554	7.99967	11.9605	14.5537	11.3352	7.58915	14.2045	11.9218	10.9376	7.96633	44.3362	6.49258	6.67021	9.56008	7.42079	10.8962	7.34471	2.31048	15.2326	9.26256	12.3813	18.5643	19.0608	26.9605	3.52524	9.47186	15.5997	32.7174	12.0078	FALSE	FALSE	FALSE	Name=Pfam:Exostosin; Dbxref=Pfam:PF03016.10; Description=exostosin family; Ontology_term=InterPro:IPR004263; score=39.10; evalue=3.80e-10;
MMETSP0851-20130426|9284_1	0.254554	20.4277	27.6329	32.2372	29.3204	17.1755	21.1844	25.1059	15.9982	19.9158	39.298	18.64	20.3617	25.9225	14.7136	15.739	16.5936	27.5974	61.1495	17.5574	15.6314	15.9618	12.7597	17.749	17.6262	27.7978	13.0386	15.3964	9.22335	FALSE	FALSE	FALSE	FALSE
MMETSP0851-20130426|13247_1	0.254657	8.71392	11.823	6.88561	7.85908	8.78744	10.8983	7.71411	5.38716	5.54179	9.47183	13.8229	15.7979	0.551543	9.33997	9.68555	6.52863	24.9018	10.8491	11.3363	6.65496	10.7569	6.14356	10.5595	11.6604	9.26595	7.68345	17.0002	8.35322	FALSE	FALSE	FALSE	FALSE
MMETSP0851-20130426|188837_1	0.25533	29.713	35.6065	37.7144	33.4011	34.6172	12.6127	25.8072	33.4657	38.273	52.1959	32.4629	26.6809	36.4018	34.0333	55.173	68.0065	139.527	135.34	66.3586	32.501	93.8626	36.0737	30.7799	47.4552	28.2097	26.31	90.1333	30.1064	Trypsin-like serine protease	ko:K01312	PPC,Trypsin	Name=Pfam:Trypsin; Dbxref=Pfam:PF00089.21; Description=trypsin; Ontology_term=InterPro:IPR001254; score=152.10; evalue=1.50e-44;
MMETSP0851-20130426|154362_1	0.25533	6.57115	9.07348	5.63368	6.49886	9.05373	10.0411	10.0985	7.50937	5.19543	5.64279	10.6813	10.883	13.4209	4.60601	5.70756	11.1531	10.3971	25.5338	13.5482	4.643	6.41944	2.04785	10.3348	5.69463	10.5014	6.63571	11.5473	4.35064	FALSE	FALSE	FALSE	FALSE
MMETSP0851-20130426|161214_1	0.259737	7.14256	9.07348	9.54596	10.8818	9.5863	7.59208	7.15308	4.73417	9.52495	12.0917	7.53977	6.49468	14.1563	6.78107	7.09121	11.6971	0.770159	2.63009	5.39164	9.75029	5.20495	5.67098	6.96479	10.5757	10.5014	12.8058	12.1888	7.83115	FALSE	FALSE	FALSE	FALSE
MMETSP0851-20130426|148728_1	0.259737	24.8561	34.3692	20.3439	34.7613	33.552	20.0823	22.4411	59.2587	22.6867	28.4155	12.1474	15.9734	18.7525	31.2185	21.9654	175.457	5.77619	4.38348	12.5805	15.941	104.793	218.018	19.097	37.4218	17.9142	20.14	14.7549	5.91687	FALSE	FALSE	FALSE	FALSE
MMETSP0851-20130426|122546_1	0.261221	6.71401	3.98683	6.41614	7.1034	1.46457	18.123	4.2077	1.63247	1.21227	0	0.418876	1.93085	0	10.7474	2.07547	1.36013	12.0658	4.71224	6.77411	2.7858	2.60247	2.04785	1.57269	0	0.82364	2.44473	0.641518	2.26233	FALSE	FALSE	FALSE	FALSE
MMETSP0851-20130426|56096_1	0.261221	5.28549	6.04899	7.0421	2.26704	3.99429	8.0819	5.75052	4.08118	6.92724	4.43362	0	3.68617	3.30926	5.50162	1.90252	1.36013	0.12836	0	0.96773	4.643	3.81696	2.52044	3.37006	14.3722	3.50047	2.9104	6.41518	1.91428	FALSE	FALSE	FALSE	FALSE
MMETSP0851-20130426|167280_1	0.261221	4.85694	4.53674	4.06877	4.53408	10.7846	6.85737	7.15308	5.06066	8.31269	20.5559	3.76988	12.2872	6.80236	9.08408	12.1069	9.52092	0.898519	1.53422	1.93546	3.2501	5.03145	6.61614	8.53748	9.21987	13.5901	4.54022	3.68873	5.22077	FALSE	FALSE	FALSE	Name=Pfam:WW; Dbxref=Pfam:PF00397.21; Description=ww domain; Ontology_term=InterPro:IPR001202; score=30.10; evalue=2.70e-07;
MMETSP0851-20130426|175121_1	0.262173	14.7137	14.1601	13.6147	10.7307	11.8497	11.633	9.25693	11.1008	8.31269	15.1146	8.37752	6.14362	8.0893	5.37368	2.42139	64.7422	2.43884	2.19174	5.80638	7.58356	26.3717	48.991	6.74012	9.21987	9.88368	4.88947	7.37746	6.43894	protein disulfide oxidoreductase activity	ko:K03676	Glutaredoxin	Name=Pfam:Glutaredoxin; Dbxref=Pfam:PF00462.19; Description=glutaredoxin; Ontology_term=InterPro:IPR002109; score=58.20; evalue=5.30e-16;
MMETSP0851-20130426|11789_1	0.262173	21.142	29.97	31.6112	26.7511	31.5549	24.4906	30.8564	22.6914	26.8431	54.4127	21.5721	21.9415	43.2042	39.1511	33.5535	138.189	79.4547	81.5327	35.253	19.5006	50.488	42.5323	27.1851	36.3371	28.4156	23.9817	18.604	25.5817	Aminotransferase class I and II	ko:K00816	Aminotran_1_2	Name=Pfam:Aminotran_1_2; Dbxref=Pfam:PF00155.16; Description=aminotransferase class i and ii; Ontology_term=InterPro:IPR004839; score=148.70; evalue=1.80e-43;
MMETSP0851-20130426|137927_1	0.262173	3.28558	2.19963	0.938947	1.6625	3.06229	3.30623	1.96359	5.38716	4.32952	1.61223	3.14157	6.84575	0.735391	2.81478	2.59434	15.5055	0.12836	0.328761	0.138247	0	12.8389	3.30807	8.53748	0.542345	2.0591	0.698496	0.962277	0.870128	FALSE	FALSE	FALSE	FALSE
MMETSP0851-20130426|133208_1	0.262173	13.9994	11.2731	10.7979	10.4284	9.05373	11.1432	8.27514	14.8555	2.07817	11.4871	4.60764	9.30319	6.06697	7.93257	7.95599	16.5936	1.2836	5.80811	3.31793	5.26206	11.9714	9.60916	13.0309	6.23697	4.32411	6.40288	10.585	4.52466	FALSE	FALSE	FALSE	FALSE
MMETSP0851-20130426|115873_1	0.262173	14.1423	15.6724	20.5003	14.5091	12.3823	9.30643	11.2205	11.5905	15.7595	12.8978	5.86426	17.5532	12.8693	13.0504	10.0315	5.98458	18.4838	5.69852	11.751	8.97646	6.93993	6.30109	10.5595	12.4739	11.9428	7.79987	4.33025	9.91945	FALSE	FALSE	FALSE	FALSE
MMETSP0851-20130426|188942_1	0.263061	22.5705	30.5199	22.2217	26.4488	32.8863	22.5313	30.2954	38.0366	12.2958	16.7269	18.64	16.6755	25.371	18.8079	21.6195	57.3975	5.13439	6.46563	12.0275	17.0243	42.8541	41.1146	14.3789	53.9634	26.3565	17.1131	19.4059	14.7922	FALSE	FALSE	FALSE	Name=Pfam:Thioredoxin; Dbxref=Pfam:PF00085.15; Description=thioredoxin; Ontology_term=InterPro:IPR013766; score=29.50; evalue=3.90e-07;
MMETSP0851-20130426|86850_1	0.264779	36.2842	29.695	17.527	29.6227	27.1612	29.8785	31.698	22.8546	25.2844	24.3849	6.91145	17.5532	32.1733	19.8314	13.8365	33.4592	3.46571	5.26018	12.5805	13.4647	21.3403	21.2662	27.8592	14.6433	19.9733	17.8116	21.4908	17.7506	FALSE	FALSE	FALSE	FALSE
MMETSP0851-20130426|61615_1	0.265141	2.42847	1.7872	7.0421	3.7784	3.99429	3.42868	3.78693	2.44871	2.07817	18.1376	4.81707	1.57979	11.0309	1.91917	1.90252	2.72026	3.33735	0.657522	4.42391	0	2.42898	0.945163	6.74012	7.86401	5.76548	1.04774	0.801897	0.522077	FALSE	FALSE	FALSE	FALSE
MMETSP0851-20130426|188135_1	0.269653	3.85698	3.71188	2.66035	3.325	3.86115	1.71434	1.26231	2.12221	8.65905	1.20917	0	0.526596	0.735391	3.96629	3.63208	7.88876	0	0.109587	1.38247	3.09533	6.07244	4.09571	9.2115	0.542345	4.73593	1.16416	26.3022	0.522077	FALSE	FALSE	FALSE	FALSE
MMETSP0851-20130426|191898_1	0.270741	21.4277	20.0716	23.9431	18.5897	25.2972	21.5517	23.2826	38.0366	21.6476	17.3314	32.044	19.8351	20.0394	23.5418	29.2296	137.373	4.49259	7.78068	14.9307	13.3099	44.9361	66.319	20.6697	17.3551	19.1496	23.3996	18.604	11.4857	FALSE	FALSE	FALSE	FALSE
MMETSP0851-20130426|194666_1	0.271608	24.8561	21.4464	17.9965	18.892	22.2349	20.9395	31.5577	15.0187	11.6031	16.7269	6.70202	9.65426	32.3572	18.2961	12.2799	21.218	5.39111	7.34233	11.6128	12.6909	19.4318	16.5404	13.4802	23.3209	18.7378	22.9339	25.34	15.6623	FALSE	FALSE	FALSE	FALSE
MMETSP0851-20130426|178523_1	0.271955	9.14248	6.04899	7.0421	6.04545	5.19258	7.95944	6.59206	7.18287	2.59771	2.21681	2.51326	1.93085	0.919238	2.30301	4.66982	11.6971	1.15524	2.73967	1.65897	3.09533	8.15442	8.19141	6.96479	3.52524	6.1773	2.09549	7.0567	3.82856	FALSE	FALSE	FALSE	FALSE
MMETSP0851-20130426|70933_1	0.272894	9.14248	6.46142	3.5993	4.38295	2.92915	7.59208	4.06744	5.8769	0.519543	0	11.1002	1.57979	11.9501	2.94273	3.80504	43.2522	0	0.328761	2.76494	1.8572	32.7912	75.4555	7.86347	21.965	3.29456	2.44473	2.08493	6.43894	FALSE	FALSE	FALSE	FALSE
MMETSP0851-20130426|84426_1	0.27321	36.1413	51.4164	34.8975	39.7488	14.2463	5.38793	13.8854	11.5905	5.88815	18.9437	29.1119	11.4096	18.9363	47.0837	88.7265	31.8271	46.0812	37.4788	440.593	48.5967	198.656	42.6899	14.1542	2.9829	11.325	20.722	68.0009	40.722	ATP-grasp domain	-	ATP-grasp_4	Name=Pfam:ATP-grasp_4; Dbxref=Pfam:PF13535.1; Description=atp-grasp domain; score=112.60; evalue=1.60e-32;
MMETSP0851-20130426|173540_1	0.27321	5.5712	5.22412	8.92	6.34772	3.32858	5.02057	4.34795	23.8341	6.23452	2.61987	1.46607	1.93085	15.0755	3.7104	10.3774	173.281	1.02688	1.20546	3.45618	2.7858	55.5194	112.317	2.24671	21.6938	6.58912	1.39699	2.40569	1.74026	FALSE	FALSE	FALSE	FALSE
MMETSP0851-20130426|178579_1	0.27321	13.1423	12.7854	12.5193	13.3	16.6429	7.22473	8.55565	3.42819	21.4744	6.24738	12.1474	7.54787	9.56008	9.08408	11.0692	22.5782	2.5672	5.26018	4.7004	8.97646	13.3594	17.0129	12.5816	9.21987	13.1782	9.89535	8.33973	13.922	FALSE	FALSE	FALSE	FALSE
MMETSP0851-20130426|1108_1	0.27321	1.71421	2.06215	4.06877	3.7784	1.19829	2.57151	4.90898	2.7752	1.55863	0.201528	1.46607	0.87766	7.35391	2.04712	6.39938	2.44824	7.44487	3.3972	2.21195	0.928599	1.56148	0.945163	0.898683	0.271173	7.20685	0.814911	1.44342	1.3922	FALSE	FALSE	FALSE	Name=Pfam:BT1; Dbxref=Pfam:PF03092.11; Description=bt1 family; Ontology_term=InterPro:IPR004324; score=42.90; evalue=2.30e-11;
MMETSP0851-20130426|42409_1	0.27321	17.7135	24.4709	28.3249	24.1818	39.1441	20.9395	20.4775	54.5245	12.2958	6.44891	21.1532	47.7447	25.7387	31.2185	16.4308	7.88876	6.41799	2.08215	14.3777	13.1552	41.1191	15.7527	50.1016	23.8632	12.3546	23.6324	200.635	18.7948	FALSE	FALSE	FALSE	FALSE
MMETSP0851-20130426|398_1	0.273318	5.5712	8.66105	15.6491	6.19658	49.1298	25.8376	39.2718	47.9947	72.736	19.5483	127.548	68.8085	41.7334	5.24573	26.4623	59.0297	37.2243	19.3969	5.52988	3.09533	1.38799	1.7328	2.69605	40.6759	5.55957	3.72531	8.66049	4.87271	-	-	-	FALSE
MMETSP0851-20130426|195368_1	0.273318	6.57115	5.77403	10.9544	7.85908	5.32572	5.63284	5.04924	8.97859	3.80998	14.3085	1.04719	4.3883	5.69928	4.60601	6.39938	5.1685	0.12836	0.547935	1.52072	2.7858	7.28693	2.36291	6.51545	4.33876	3.91229	2.79398	3.84911	2.08831	Zinc-binding dehydrogenase	-	ADH_N,ADH_zinc_N,ADH_zinc_N_2	FALSE
MMETSP0851-20130426|82770_1	0.273318	12.5709	13.7477	19.0919	15.4159	17.4417	14.4495	14.0257	14.0393	3.46362	15.9207	13.404	21.2394	8.64084	13.818	19.717	38.6277	9.62699	7.78068	85.022	12.8456	15.2678	15.2801	16.6256	23.3209	16.4728	10.4774	25.5003	19.1428	FALSE	FALSE	FALSE	FALSE
MMETSP0851-20130426|69545_1	0.275682	10.8567	17.0471	10.9544	16.4738	23.1669	11.5106	10.7998	12.8965	7.96633	147.317	1.6755	12.4628	12.3178	71.2652	52.7516	71.5429	203.835	282.844	86.6809	80.7881	64.1944	83.0168	10.5595	17.0839	11.7369	59.1393	58.0574	62.1271	Ran-binding domain	-	Ran_BP1	Name=Pfam:Ran_BP1; Dbxref=Pfam:PF00638.13; Description=ranbp1 domain; Ontology_term=InterPro:IPR000156; score=132.30; evalue=8.00e-39;
MMETSP0851-20130426|145646_1	0.275682	1.57136	2.74954	2.03439	3.92954	1.864	1.59189	0.42077	2.93845	3.29044	3.02293	2.30382	2.28192	7.7216	4.22218	8.47485	3.53634	5.39111	0.438348	4.42391	1.54767	2.42898	0.630109	1.79737	1.62704	0.41182	1.39699	0.641518	1.74026	FALSE	FALSE	FALSE	FALSE
MMETSP0851-20130426|72715_1	0.275682	61.426	65.5765	62.9094	65.1397	52.7246	52.7772	52.0352	41.1383	41.7366	69.7288	9.63415	53.1862	64.5305	37.3599	121.588	145.534	107.437	131.724	17.4191	15.7862	11.9714	24.7318	8.98683	16.8127	15.4432	24.7966	30.7929	27.322	FALSE	FALSE	FALSE	FALSE
MMETSP0851-20130426|172682_1	0.275682	7.14256	10.5857	13.1453	14.9625	8.92058	4.89812	12.0621	7.18287	3.6368	8.06114	6.70202	7.54787	17.0978	10.1076	10.2044	3.80837	13.0927	2.95885	9.6773	4.02393	4.51096	0.630109	10.3348	9.21987	9.06004	5.58796	4.16987	8.35322	FALSE	FALSE	FALSE	FALSE
MMETSP0851-20130426|6526_1	0.275682	5.42834	1.64972	3.91228	3.47613	3.06229	2.32661	5.61026	2.12221	3.80998	2.8214	0.418876	1.40426	0.551543	1.02356	3.97799	1.63216	0	0.547935	0.276494	3.55963	0.693993	0.472582	1.12335	1.62704	4.94184	2.32832	2.88683	2.26233	FALSE	FALSE	FALSE	FALSE
MMETSP0851-20130426|38066_1	0.275682	17.285	13.0603	12.2063	11.4863	14.6457	28.1642	19.4957	20.8956	7.96633	9.87489	28.9024	19.484	34.1957	7.54874	11.5881	14.6894	14.7614	5.47935	14.3777	2.63103	5.37845	6.77367	10.3348	13.2875	9.06004	5.00588	6.57556	12.3558	FALSE	FALSE	FALSE	FALSE
MMETSP0851-20130426|1762_1	0.275778	661.544	613.285	1264.76	473.661	1152.22	458.709	730.176	1159.54	2861.82	1106.19	428.091	1503.61	1272.96	550.802	1235.43	3462.89	1727.21	867.272	203.914	153.528	240.989	206.203	268.481	1968.98	266.242	178.233	403.034	215.444	-	-	-	FALSE
MMETSP0851-20130426|83618_1	0.275778	12.7138	9.62339	13.3017	13.9045	15.0452	12.0004	16.2698	6.52989	9.00541	2.21681	17.5928	11.5851	6.98621	13.1783	11.0692	4.89647	1.54032	9.75324	6.49761	10.2146	10.2364	7.56131	10.5595	25.7614	12.3546	12.3401	14.4342	11.8337	ATP-dependent microtubule motor activity, plus-end-directed	ko:K10398,ko:K14400	Kinesin	Name=Pfam:Kinesin; Dbxref=Pfam:PF00225.18; Description=kinesin motor domain; Ontology_term=InterPro:IPR001752; score=125.70; evalue=1.50e-36;
MMETSP0851-20130426|191935_1	0.275778	28.9988	34.0943	29.2638	39.7488	28.6258	23.8783	29.8746	27.5888	12.6422	28.4155	27.4364	33.5266	28.8641	34.801	31.1321	41.892	40.8184	18.6298	51.5662	30.6438	36.2611	27.2522	22.0177	15.4568	36.652	27.707	32.557	24.0155	m7G(5')pppN diphosphatase activity	-	-	FALSE
MMETSP0851-20130426|129607_1	0.275778	14.428	10.1733	12.5193	17.2295	10.9177	13.1025	12.6231	6.20339	8.31269	13.3009	5.65483	8.42553	8.82469	8.82819	18.1604	17.6817	43.1289	43.2869	16.8661	13.3099	19.0848	10.3968	8.98683	1.89821	17.2964	13.6207	9.14163	15.1402	FALSE	FALSE	FALSE	Name=Pfam:BTB; Dbxref=Pfam:PF00651.26; Description=btb/poz domain; Ontology_term=InterPro:IPR013069; score=32.70; evalue=5.30e-08;
MMETSP0851-20130426|190854_1	0.275778	40.5697	40.2807	40.2182	47.9102	51.5264	38.3278	42.9185	33.6289	15.2399	39.298	38.5366	36.3351	72.436	57.7031	60.7076	65.8303	207.044	314.953	89.9989	81.7167	68.7053	83.8045	48.3042	58.8445	47.7711	74.5062	78.2652	103.719	FALSE	FALSE	FALSE	Name=Pfam:HATPase_c; Dbxref=Pfam:PF02518.21; Description=histidine kinase- dna gyrase b- and hsp90-like atpase; Ontology_term=InterPro:IPR003594; score=75.90; evalue=1.60e-21;
MMETSP0851-20130426|11351_1	0.275778	3.57128	7.56123	4.53824	2.87159	5.72515	2.44906	4.76872	5.38716	0.173181	4.2321	0	2.63298	2.02232	3.96629	2.94026	0.544052	22.5913	3.06844	13.1335	2.3215	6.59293	2.83549	1.79737	13.2875	3.50047	1.97907	7.0567	5.39479	FALSE	FALSE	FALSE	FALSE
MMETSP0851-20130426|110898_1	0.275778	1.71421	5.49908	3.91228	0.453408	1.19829	2.81642	1.82334	19.0999	5.02225	7.45655	0.209438	5.79255	5.69928	7.03696	4.84277	89.4966	1.41196	1.42463	0.552988	1.23813	20.4728	34.0259	2.47138	7.05049	3.70638	0.931327	6.2548	2.43636	FALSE	FALSE	FALSE	FALSE
MMETSP0851-20130426|100524_1	0.275778	9.71388	7.01132	7.51158	11.9398	4.52686	9.06152	10.7998	8.16236	6.58088	6.65044	5.23595	6.84575	7.17006	5.50162	8.99372	4.35242	13.3494	2.63009	6.63586	4.643	5.03145	4.88334	8.98683	9.76222	5.14775	3.95814	3.52835	6.26492	FALSE	FALSE	FALSE	FALSE
MMETSP0851-20130426|129328_1	0.278472	2.57132	4.39926	5.47719	1.51136	3.32858	3.18378	2.10385	2.61195	3.80998	3.42598	5.44539	2.80851	0.183848	2.43095	2.59434	0.544052	0	0.438348	0.276494	2.01196	1.21449	3.62313	6.29078	3.79642	3.91229	1.97907	0.641518	0.870128	FALSE	FALSE	FALSE	FALSE
MMETSP0851-20130426|144168_1	0.280896	2.42847	0.412431	3.44281	1.51136	2.796	1.71434	0.701283	8.81534	0	2.01528	0	4.73936	2.57387	1.53534	3.45912	29.1068	0	0	0.138247	0.154767	24.4633	25.3619	1.57269	5.42345	0	1.16416	0	0.870128	FALSE	FALSE	FALSE	FALSE
MMETSP0851-20130426|95765_1	0.282706	9.14248	3.43692	7.98105	11.6375	9.5863	17.8781	6.87257	6.36664	13.6813	1.00764	0.209438	7.89894	1.83848	1.1515	1.72956	0	6.54635	0.328761	1.38247	2.01196	0.693993	0.630109	4.49341	5.15228	7.20685	1.04774	0	0.696102	FALSE	FALSE	FALSE	FALSE
MMETSP0851-20130426|194998_1	0.28724	34.8557	43.0303	36.306	45.3408	30.0903	27.6744	23.4228	17.9572	15.5863	31.0354	9.21527	24.2234	31.2541	19.8314	22.3114	22.8502	44.0274	118.354	31.1056	27.0841	17.3498	16.3828	19.5463	29.0155	25.7387	24.0981	29.5098	18.4467	FALSE	FALSE	FALSE	FALSE
MMETSP0851-20130426|148453_1	0.288356	6.57115	7.97366	11.5803	10.5795	21.7023	10.2861	13.4646	8.48885	4.50271	11.2856	15.289	6.67021	10.1116	11.1312	14.5283	8.16078	42.4871	81.7519	19.0781	17.0243	11.6244	14.9651	11.9075	9.76222	9.06004	15.7162	12.5096	17.7506	Uncharacterized ACR, COG1678	-	DUF179	FALSE
MMETSP0851-20130426|156227_1	0.288356	8.99962	11.823	7.0421	8.01022	5.85829	7.34718	10.94	6.52989	2.42453	8.86725	7.33033	9.47873	5.69928	8.06052	8.3019	4.35242	5.77619	1.75339	13.6865	4.95253	3.46997	2.52044	3.8194	5.15228	7.20685	3.72531	8.50011	2.26233	FALSE	FALSE	FALSE	FALSE
MMETSP0851-20130426|42924_1	0.288356	3.28558	8.936	9.85894	6.19658	3.46172	6.0002	1.26231	8.81534	0	5.64279	0.628314	2.63298	4.2285	1.02356	3.80504	55.4933	0.770159	1.42463	0.276494	1.54767	49.447	62.8534	4.04407	34.1678	2.67683	2.79398	0.962277	0	FALSE	FALSE	FALSE	FALSE
MMETSP0851-20130426|156484_1	0.288356	39.4269	27.4954	32.7067	39.5977	82.5487	49.8384	95.3745	454.807	37.0607	4840.51	43.3537	117.606	287.722	52.5853	123.318	2956.65	42.7438	18.301	38.4327	42.2513	1300.89	1697.2	112.785	399.709	87.5117	37.4859	100.077	20.709	FALSE	FALSE	FALSE	FALSE
MMETSP0851-20130426|187083_1	0.288356	0.142851	2.74954	4.38175	0.453408	1.06514	0.122453	0.42077	13.223	3.98316	1.81376	0	0.702128	0	1.79123	0.864781	69.0946	0	0.986283	0.691235	0.619066	16.4823	18.9033	0.898683	0	1.44137	1.28058	0.962277	1.56623	FALSE	FALSE	FALSE	FALSE
MMETSP0851-20130426|46903_1	0.288356	2.28562	6.32394	5.79017	7.25454	1.864	5.02057	4.76872	4.24443	1.38545	8.86725	3.97932	4.21277	2.02232	8.70024	19.0252	31.8271	1.41196	0.109587	2.21195	3.2501	24.8103	10.5543	5.84144	6.50814	8.03049	3.60889	5.4529	4.69869	FALSE	FALSE	FALSE	FALSE
MMETSP0851-20130426|27004_1	0.288356	4.85694	4.67422	6.25965	3.62727	4.26058	7.34718	4.48821	3.26494	2.94408	1.61223	1.04719	2.63298	10.2955	1.27945	2.07547	0.816078	2.95228	0.876696	5.80638	0.928599	3.12297	0	2.69605	0.813518	1.02955	1.28058	1.28304	0.522077	FALSE	FALSE	FALSE	Name=Pfam:Chloroa_b-bind; Dbxref=Pfam:PF00504.16; Description=chlorophyll a-b binding protein; Ontology_term=InterPro:IPR022796; score=34.60; evalue=1.80e-08;
MMETSP0851-20130426|186093_1	0.288356	7.42826	6.73637	8.76351	4.08068	26.4955	7.34718	7.4336	8.48885	7.61996	7.05349	12.5663	14.2181	0.367695	5.24573	7.26416	14.4174	1.9254	3.83554	3.59442	6.03589	15.0944	11.9721	5.16742	1.35586	9.47186	13.8535	12.1888	3.82856	FALSE	FALSE	FALSE	FALSE
MMETSP0851-20130426|114318_1	0.288356	17.7135	18.5594	11.1109	16.3227	17.3086	23.8783	15.4282	13.5495	12.6422	9.47183	6.91145	11.9362	14.8917	11.0032	15.5661	11.6971	6.54635	6.13687	9.12431	15.6314	24.9838	15.2801	20.8944	4.33876	11.531	16.7639	30.7929	18.0987	FALSE	FALSE	FALSE	FALSE
MMETSP0851-20130426|75092_1	0.289471	3.57128	4.94917	1.87789	6.95226	3.32858	2.32661	1.12205	6.69313	1.21227	0	0	2.10638	2.39002	0.767668	1.21069	0.544052	0.12836	0.438348	0.138247	2.7858	2.42898	2.20538	0.674012	1.35586	9.67777	1.74624	4.16987	0.522077	FALSE	FALSE	FALSE	FALSE
MMETSP0851-20130426|84125_1	0.289796	11.2852	18.0095	13.6147	11.9398	15.3114	17.3883	12.2023	12.4068	18.5304	20.1528	10.8908	10.0053	9.74392	14.7136	12.9717	4.35242	1.02688	1.97257	7.18885	14.7028	9.36891	7.87636	15.2776	12.4739	11.7369	5.70438	29.3494	7.65712	Calsequestrin	ko:K09580	Thioredoxin,Thioredoxin_6	Name=Pfam:Thioredoxin; Dbxref=Pfam:PF00085.15; Description=thioredoxin; Ontology_term=InterPro:IPR013766; score=60.40; evalue=9.90e-17;
MMETSP0851-20130426|4564_1	0.289796	15.2851	15.8098	13.7712	13.9045	13.1812	11.3881	8.83616	8.81534	13.8545	22.3697	11.7285	15.7979	8.64084	11.515	16.6038	20.946	21.8212	51.8347	13.6865	14.5481	12.6654	5.67098	17.2996	18.1686	14.2078	7.79987	9.14163	8.8753	FALSE	FALSE	FALSE	FALSE
MMETSP0851-20130426|194981_1	0.294375	38.9984	44.8175	43.1916	36.1215	63.6424	35.2665	45.7236	42.6075	22.5135	37.0812	61.9936	36.3351	42.8365	39.7908	61.3995	15.5055	27.5974	22.2462	37.1885	28.7866	506.788	59.3878	37.2953	43.6588	46.5356	27.4742	44.9063	226.929	ABC transporter	ko:K05032,ko:K05665	ABC_membrane,ABC_tran	Name=Pfam:ABC_membrane; Dbxref=Pfam:PF00664.18; Description=abc transporter transmembrane region; Ontology_term=InterPro:IPR001140; score=68.50; evalue=5.40e-19;
MMETSP0851-20130426|188398_1	0.295565	7.71396	13.0603	5.47719	11.6375	7.85544	6.73491	10.7998	7.01963	6.4077	7.05349	5.23595	7.72341	13.237	4.73395	13.6635	3.26431	0	2.63009	4.83865	10.6789	7.11343	7.71883	4.71808	14.6433	6.79503	9.31327	8.01897	6.78699	ABC transporter	-	ABC_tran	Name=Pfam:ABC_tran; Dbxref=Pfam:PF00005.22; Description=abc transporter; Ontology_term=InterPro:IPR003439; score=31.70; evalue=1.40e-07;
MMETSP0851-20130426|61291_1	0.296488	24.999	37.8062	23.3172	30.6806	17.0423	18.6129	27.6305	23.0178	28.4017	48.7699	31.8346	21.2394	52.2127	20.727	27.846	43.7962	74.7054	111.56	44.6538	37.4535	20.1258	20.4785	19.097	4.33876	30.2688	38.6501	24.0569	24.0155	Phospholipid methyltransferase	-	-	Name=Pfam:PEMT; Dbxref=Pfam:PF04191.8; Description=phospholipid methyltransferase; Ontology_term=InterPro:IPR007318; score=36.50; evalue=3.60e-09;
MMETSP0851-20130426|160170_1	0.296488	5.99975	10.5857	2.81684	4.68522	4.52686	5.14303	6.4518	6.20339	3.11726	21.7651	0.418876	0.702128	0.367695	8.06052	13.3176	5.1685	10.1404	22.5749	77.0036	3.55963	7.46043	19.0608	10.5595	0	5.35366	4.77305	17.321	5.22077	FALSE	FALSE	FALSE	FALSE
MMETSP0851-20130426|158310_1	0.296488	3.42843	7.1488	4.53824	3.92954	6.79029	6.97982	8.41539	6.36664	1.38545	14.107	7.53977	7.89894	3.12541	7.42079	1.72956	18.2258	1.02688	1.6438	0.96773	3.2501	6.76643	4.25323	23.3657	6.50814	4.53002	3.95814	14.9153	2.43636	FALSE	FALSE	FALSE	FALSE
MMETSP0851-20130426|159828_1	0.296488	19.9992	24.7458	21.5958	19.95	17.0423	16.2862	23.4228	39.9955	12.469	18.7421	8.16808	6.31915	16.7301	13.5621	28.8837	231.494	6.67471	7.01357	11.8893	15.0124	73.2163	74.0378	19.9957	37.1507	19.5614	16.5311	12.5096	13.2259	FALSE	FALSE	FALSE	Name=Pfam:RNA_ligase; Dbxref=Pfam:PF09414.5; Description=rna ligase; Ontology_term=InterPro:IPR021122; score=89.80; evalue=1.60e-25;
MMETSP0851-20130426|41765_1	0.296488	53.9977	24.0585	61.6575	34.7613	42.3395	44.9402	36.0459	47.6682	31.8653	6.85197	24.2948	23.5213	30.151	46.6998	33.3806	9.79294	40.9468	11.397	32.0733	14.2385	31.0562	12.6022	20.6697	27.1173	22.2383	16.1818	11.2266	24.8856	FALSE	FALSE	FALSE	FALSE
MMETSP0851-20130426|185729_1	0.296488	3.57128	1.51225	3.44281	3.325	4.12743	6.49001	4.2077	1.46922	1.73181	7.05349	1.46607	2.63298	0.183848	2.81478	2.42139	4.08039	0.25672	0.328761	0	2.94056	1.73498	0	4.94275	5.69463	3.08865	1.51341	4.16987	1.56623	FALSE	FALSE	FALSE	FALSE
MMETSP0851-20130426|191185_1	0.296716	333.558	307.123	1492.46	264.035	551.079	388.053	397.207	974.096	2690.37	748.275	182.63	877.484	1129.38	150.719	403.68	555.205	1035.74	219.393	98.4319	83.4192	88.1371	100.187	106.045	894.87	165.14	82.0732	191.653	80.2258	ATPase activity, coupled to transmembrane movement of substances	ko:K05643,ko:K05645	ABC2_membrane_3,ABC_tran	Name=Pfam:ABC2_membrane_3; Dbxref=Pfam:PF12698.2; Description=abc-2 family transporter protein; score=80.50; evalue=1.00e-22;
MMETSP0851-20130426|7913_1	0.299893	18.9992	17.4596	19.7179	19.1943	28.7589	18.123	19.2151	28.405	32.2117	25.7956	47.7519	35.9841	34.7472	36.3363	15.912	14.4174	60.2007	78.2451	37.6032	31.1081	27.9332	26.307	32.1279	21.4226	24.5033	26.1936	27.2645	31.1506	FALSE	FALSE	FALSE	Name=Pfam:CS; Dbxref=Pfam:PF04969.11; Description=cs domain; Ontology_term=InterPro:IPR017447; score=39.20; evalue=6.90e-10;
MMETSP0851-20130426|149312_1	0.299912	4.85694	7.56123	3.91228	8.16135	1.864	4.65321	3.36616	2.28546	1.73181	0	1.04719	6.49468	2.02232	3.45451	0.864781	0.816078	0	1.86298	0.414741	2.01196	6.93993	0.472582	5.61677	33.6254	1.23546	2.9104	2.24531	2.95843	FALSE	FALSE	FALSE	FALSE
MMETSP0851-20130426|10575_1	0.300443	27.7131	30.2449	46.7909	32.7965	35.5492	25.8376	38.8511	24.4871	16.4522	85.2465	10.053	35.4575	68.9429	33.9054	57.7674	39.4438	69.4427	123.614	80.0451	35.2868	38.3431	33.5533	45.8328	57.7598	54.3602	34.5755	54.529	31.1506	FALSE	FALSE	FALSE	FALSE
MMETSP0851-20130426|145876_1	0.300443	3.71413	6.73637	6.88561	6.34772	4.12743	0.857171	11.3608	5.06066	0.173181	1.81376	0.209438	2.28192	0.183848	2.94273	12.4528	6.2566	34.6571	29.4789	7.88008	6.96449	4.68445	7.40378	7.18946	16.5415	6.58912	2.32832	2.24531	3.48051	FALSE	FALSE	FALSE	FALSE
MMETSP0851-20130426|5645_1	0.300835	43.4268	24.0585	21.4393	21.3102	10.7846	7.83699	12.9036	10.2846	8.65905	34.0583	10.053	14.2181	7.35391	17.9123	8.64781	4.89647	0.25672	4.16431	3.31793	4.33346	4.51096	6.9312	11.9075	1.89821	21.6205	5.23872	13.1511	5.74284	glyceraldehyde-3-phosphate dehydrogenase (NAD(P)+) (phosphorylating) activity	ko:K00134	Gp_dh_C,Gp_dh_N	Name=Pfam:Gp_dh_N; Dbxref=Pfam:PF00044.19; Description=glyceraldehyde 3-phosphate dehydrogenase nad binding domain; Ontology_term=InterPro:IPR020828; score=107.00; evalue=7.20e-31;
MMETSP0851-20130426|134942_2	0.300835	3.14273	4.39926	3.12982	4.08068	1.73086	5.38793	1.54282	1.46922	0	1.00764	4.18876	0.175532	6.61851	1.1515	3.11321	0	0	0.547935	0.414741	2.47626	2.25548	2.20538	2.02204	0	1.85319	1.62982	3.36797	3.13246	Citrate transporter	-	CitMHS	FALSE
MMETSP0851-20130426|10773_1	0.300835	28.5702	29.0076	31.9242	32.7965	33.9515	26.2049	35.0641	22.0384	9.35177	37.0812	16.1267	20.1862	38.7918	20.3432	17.9874	20.402	6.03291	9.75324	14.3777	15.1671	33.6587	31.5054	32.5772	20.6091	26.1506	17.4624	26.4626	16.5324	FALSE	FALSE	FALSE	Name=Pfam:Sulfotransfer_2; Dbxref=Pfam:PF03567.9; Description=sulfotransferase family; Ontology_term=InterPro:IPR005331; score=26.60; evalue=3.80e-06;
MMETSP0851-20130426|151329_1	0.300835	22.4276	20.759	16.901	20.5545	17.0423	25.3478	23.0021	22.0384	19.0499	62.8769	10.6813	15.6223	16.5463	10.2356	13.6635	17.4097	11.2957	7.89026	55.0223	16.8696	21.6873	11.4995	16.8503	14.9145	15.6492	15.949	19.4059	15.4883	FALSE	FALSE	FALSE	FALSE
MMETSP0851-20130426|188644_1	0.300835	15.2851	27.083	23.3172	14.0557	47.6652	16.6536	20.6177	18.7734	8.13951	32.6476	68.2768	12.4628	18.3848	78.3022	129.89	73.4471	605.088	635.824	590.453	158.636	426.979	250.783	35.9473	14.9145	32.1219	93.9477	288.843	209.875	FALSE	FALSE	FALSE	FALSE
MMETSP0851-20130426|6959_1	0.300835	6.1426	4.26179	2.50386	3.17386	2.92915	5.14303	3.36616	6.20339	1.03909	2.61987	0.628314	5.09043	8.27314	7.42079	2.7673	4.89647	96.0131	47.4512	35.806	31.2628	10.5834	21.5812	4.94275	7.32166	2.0591	27.3577	8.82087	29.0623	FALSE	FALSE	FALSE	FALSE
MMETSP0851-20130426|190999_1	0.306315	27.1417	30.1075	28.3249	26.1466	48.5972	26.0825	21.88	26.2828	27.5358	40.5072	32.4629	18.0798	15.8109	185.264	263.066	155.599	1940.54	1499.26	598.057	746.903	681.328	629.794	26.2865	10.8469	19.5614	513.743	423.402	862.818	protein kinase activity	ko:K14304	Ank,Ank_2,Ank_3,Ank_4,COR,LRR_4,LRR_8,Pkinase,Pkinase_Tyr,Roc	Name=Pfam:Pkinase; Dbxref=Pfam:PF00069.20; Description=protein kinase domain; Ontology_term=InterPro:IPR000719; score=122.70; evalue=1.30e-35;
MMETSP0851-20130426|30416_1	0.306315	3.42843	1.92468	3.28631	4.23181	0.532572	3.42868	0.981796	5.06066	7.96633	0	0	1.93085	2.94156	3.58245	2.07547	58.2136	0.385079	0	0.276494	0.4643	15.2678	10.7118	0.898683	3.25407	1.02955	2.32832	0.320759	0.696102	FALSE	FALSE	FALSE	FALSE
MMETSP0851-20130426|135823_1	0.310533	6.1426	9.76086	5.47719	8.61476	7.7223	6.61246	5.75052	6.36664	3.80998	8.26266	3.56045	5.96809	5.69928	7.67668	3.28617	9.24889	0	2.19174	3.45618	5.72636	9.36891	9.13658	8.31281	0	2.67683	5.8208	10.7454	5.39479	proline iminopeptidase	ko:K01259	Abhydrolase_1	Name=Pfam:Abhydrolase_6; Dbxref=Pfam:PF12697.2; Description=alpha/beta hydrolase family; score=32.90; evalue=5.20e-08;
MMETSP0851-20130426|1149_1	0.313898	1.42851	1.92468	0.625965	0.906817	3.46172	3.67359	1.96359	8.3256	11.0836	9.47183	0	1.22872	2.02232	4.98984	4.66982	42.7081	0.770159	1.42463	1.38247	6.19066	18.5643	28.5124	3.59473	4.06759	5.76548	2.79398	0	0.870128	FALSE	FALSE	FALSE	FALSE
MMETSP0851-20130426|145980_1	0.313998	11.7138	21.3089	16.2751	18.892	19.1726	10.2861	14.5867	12.0803	12.6422	23.1758	11.7285	11.4096	18.3848	47.7234	53.7894	59.3017	679.28	843.601	494.51	292.354	155.975	417.762	21.5684	12.7451	14.0019	277.07	116.917	402.173	ATPase family associated with various cellular activities (AAA)	-	AAA,AAA_30	Name=Pfam:T2SE; Dbxref=Pfam:PF00437.15; Description=type ii/iv secretion system protein; Ontology_term=InterPro:IPR001482; score=30.70; evalue=1.30e-07;
MMETSP0851-20130426|66476_1	0.313998	32.1415	24.6084	15.6491	27.6579	24.7646	22.6538	22.8618	18.2837	14.5472	38.895	13.6135	18.9575	18.9363	26.3566	21.7925	20.1299	23.8749	4.60265	26.6817	16.56	19.9523	14.335	16.8503	13.5586	13.1782	13.8535	20.2078	13.748	FALSE	FALSE	FALSE	Name=Pfam:KH_1; Dbxref=Pfam:PF00013.24; Description=kh domain; Ontology_term=InterPro:IPR004088; score=27.10; evalue=2.10e-06;
MMETSP0851-20130426|190838_1	0.313998	24.999	31.8947	33.8021	27.3556	22.5012	11.0208	23.0021	16.9777	19.3963	43.1271	30.1591	14.0426	22.4294	23.2859	19.3711	27.2026	33.3735	18.1914	18.1104	19.8101	15.0944	9.92421	24.0398	9.76222	26.1506	9.42969	16.1983	9.04933	FALSE	FALSE	FALSE	Name=Pfam:Aldo_ket_red; Dbxref=Pfam:PF00248.16; Description=aldo/keto reductase family; Ontology_term=InterPro:IPR023210; score=50.10; evalue=1.40e-13;
MMETSP0851-20130426|183479_1	0.316561	26.2846	27.7703	14.0842	22.8216	19.1726	36.6134	26.3682	39.5058	18.8767	21.362	18.2211	14.9202	40.4465	18.9358	16.7768	134.381	6.28963	7.5615	14.7924	13.929	79.9827	78.1335	13.9296	15.1857	18.9437	12.5729	30.7929	11.1376	Lys63-specific deubiquitinase activity	-	Peptidase_C97	Name=Pfam:DUF862; Dbxref=Pfam:PF05903.9; Description=pppde putative peptidase domain; Ontology_term=InterPro:IPR008580; score=107.80; evalue=3.60e-31;
MMETSP0851-20130426|105525_1	0.316561	41.1411	52.1038	38.1838	43.9806	36.2149	35.8787	30.4357	36.5674	46.0661	25.3926	17.3834	24.0479	21.1425	33.1377	33.5535	8.97686	137.473	54.5743	81.9805	82.0263	36.0876	20.9511	19.771	20.338	27.7978	82.5389	37.5288	60.7349	peptidyl-prolyl cis-trans isomerase activity	ko:K01802,ko:K12737	Pro_isomerase	Name=Pfam:Pro_isomerase; Dbxref=Pfam:PF00160.16; Description=cyclophilin type peptidyl-prolyl cis-trans isomerase/cld; Ontology_term=InterPro:IPR002130; score=141.10; evalue=2.80e-41;
MMETSP0851-20130426|169171_1	0.316561	1.57136	2.19963	1.56491	3.02272	0.532572	3.55114	2.10385	15.3452	0	1.61223	0.209438	1.93085	0	1.40739	3.28617	2.44824	0.12836	5.15059	1.38247	7.58356	9.19541	17.1705	2.24671	0	3.50047	7.3342	0.801897	4.17661	FALSE	FALSE	FALSE	Name=Pfam:Ion_trans; Dbxref=Pfam:PF00520.26; Description=ion transport protein; Ontology_term=InterPro:IPR005821; score=30.50; evalue=1.80e-07;
MMETSP0851-20130426|124835_1	0.316561	1.28566	1.23729	1.87789	3.47613	2.52972	1.95925	7.57385	2.44871	0.173181	0.201528	1.04719	1.93085	0	1.79123	1.38365	0	0	5.15059	0.691235	1.3929	1.90848	7.71883	7.6388	0	2.0591	8.61478	0.962277	1.74026	FALSE	FALSE	FALSE	FALSE
MMETSP0851-20130426|157047_1	0.316561	2.57132	3.71188	4.69474	2.87159	2.52972	2.93887	4.34795	4.40767	13.1618	9.67336	8.58696	5.96809	1.65463	3.58245	3.63208	0	13.9912	0.438348	2.48845	1.3929	1.90848	1.41774	1.57269	0.542345	8.64822	2.44473	2.88683	4.00259	FALSE	FALSE	FALSE	FALSE
MMETSP0851-20130426|170258_1	0.316653	6.4283	5.77403	5.3207	9.67271	8.38801	6.12265	3.64667	20.4059	3.11726	5.23974	3.35101	8.25	4.59619	5.75751	5.88051	7.34471	0.513439	1.20546	2.48845	5.57159	22.3813	4.72582	6.06611	5.9658	7.20685	4.30739	4.49063	1.74026	FALSE	FALSE	FALSE	FALSE
MMETSP0851-20130426|61404_1	0.31668	4.57124	1.23729	3.5993	1.96477	1.19829	1.83679	3.36616	0.979483	2.07817	1.61223	0	0.87766	4.2285	1.02356	2.59434	5.98458	7.95831	3.50678	7.0506	0.309533	3.99046	0.157527	2.24671	2.16938	1.85319	0	1.92455	2.61038	FALSE	FALSE	FALSE	FALSE
MMETSP0851-20130426|59205_1	0.31668	6.28545	10.9982	9.85894	8.31249	9.45315	9.30643	9.11668	12.2435	20.4354	36.4766	18.0117	15.7979	10.1116	7.42079	19.3711	19.0418	34.1437	37.15	19.0781	13.0004	8.32792	12.4446	8.31281	19.2533	22.0324	14.3192	9.46239	18.7948	FALSE	FALSE	FALSE	FALSE
MMETSP0851-20130426|187272_1	0.31668	2.42847	2.06215	2.34737	2.11591	14.3794	0.367359	2.38436	3.26494	3.98316	0	2.93213	0.175532	0	2.30301	0.864781	0	5.90455	1.31504	3.45618	0.928599	1.90848	0	4.49341	1.89821	4.1182	0.465664	0.801897	1.21818	FALSE	FALSE	FALSE	FALSE
MMETSP0851-20130426|93774_1	0.317924	8.28537	8.52357	6.10316	6.49886	9.98573	8.44926	6.31155	3.42819	14.0277	7.65808	1.46607	3.68617	3.30926	11.2591	22.8302	13.8733	83.9473	98.7379	46.1745	23.9888	56.9074	12.2871	2.92072	4.60994	5.76548	15.1341	35.4439	25.5817	FALSE	FALSE	FALSE	FALSE
MMETSP0851-20130426|20461_1	0.319651	21.7134	15.2599	13.1453	20.2522	9.5863	6.49001	10.379	20.7324	26.1503	2.21681	1.04719	4.73936	3.30926	12.5386	8.99372	2.17621	1.15524	0	1.38247	7.58356	5.37845	1.10269	7.6388	4.06759	14.2078	4.88947	25.5003	1.3922	Glyceraldehyde-3-phosphate dehydrogenase	ko:K00134	Gp_dh_C,Gp_dh_N	Name=Pfam:Gp_dh_C; Dbxref=Pfam:PF02800.15; Description=glyceraldehyde 3-phosphate dehydrogenase c-terminal domain; Ontology_term=InterPro:IPR020829; score=93.00; evalue=1.10e-26;
MMETSP0851-20130426|187023_1	0.319651	38.427	29.0076	29.1074	39.7488	58.3166	51.3078	33.5213	34.6084	11.7763	27.4079	24.0854	24.2234	38.2403	30.5788	24.5598	19.5859	46.723	60.9304	40.3682	18.2624	27.2392	3.78065	34.3746	29.829	18.7378	14.2027	34.9627	26.6259	Family with sequence similarity 188, member B	ko:K09864	DUF4205	Name=Pfam:DUF4205; Dbxref=Pfam:PF13898.1; Description=domain of unknown function (duf4205); Ontology_term=InterPro:IPR025257; score=287.10; evalue=1.20e-85;
MMETSP0851-20130426|147821_1	0.319651	9.14248	6.59889	7.66807	9.82385	11.3172	8.0819	16.971	14.529	4.67589	7.05349	14.6607	11.4096	17.6494	13.3063	22.6573	10.065	34.5288	35.287	14.3777	8.20263	6.76643	16.6979	12.1322	13.2875	8.44231	9.19686	11.5473	15.3142	post-chaperonin tubulin folding pathway	ko:K18272	TBCC	Name=Pfam:TBCC; Dbxref=Pfam:PF07986.7; Description=tubulin binding cofactor c; Ontology_term=InterPro:IPR012945; score=123.30; evalue=3.00e-36;
MMETSP0851-20130426|169265_1	0.319651	9.57103	11.1356	10.3284	6.95226	13.7137	8.44926	13.4646	13.876	7.44678	24.1834	34.9761	15.9734	19.4878	12.7945	14.5283	8.16078	51.729	34.6295	49.9072	41.4774	13.8799	10.3968	8.31281	11.1181	15.4432	27.707	13.7926	30.1064	FALSE	FALSE	FALSE	FALSE
MMETSP0851-20130426|183500_1	0.319651	6.71401	8.66105	7.82456	8.91703	4.26058	8.3268	6.4518	5.5504	4.67589	1.4107	2.09438	1.05319	2.02232	4.8619	2.94026	1.90418	0	3.17802	1.65897	3.2501	3.29647	3.15054	6.06611	0.813518	4.73593	5.47155	3.52835	1.91428	FALSE	FALSE	FALSE	Name=Pfam:W2; Dbxref=Pfam:PF02020.13; Description=eif4-gamma/eif5/eif2-epsilon; Ontology_term=InterPro:IPR003307; score=36.50; evalue=3.00e-09;
MMETSP0851-20130426|152919_1	0.319651	11.7138	17.4596	11.2674	22.217	17.4417	9.79624	17.1113	15.3452	8.31269	31.2369	4.3982	11.7606	15.627	13.946	12.2799	5.44052	3.59407	15.2326	9.6773	17.3338	14.2269	27.2522	8.31281	12.7451	14.4137	14.4356	12.5096	14.6181	FALSE	FALSE	FALSE	Name=Pfam:Gaa1; Dbxref=Pfam:PF04114.9; Description=gaa1-like gpi transamidase component; Ontology_term=InterPro:IPR007246; score=43.40; evalue=1.60e-11;
MMETSP0851-20130426|185823_1	0.319651	4.42839	3.71188	5.63368	4.83636	8.25487	4.77567	0.981796	2.61195	0	7.05349	0	0.351064	2.39002	4.09423	5.18869	16.8656	0.385079	0	0.691235	0.4643	9.7159	2.52044	2.24671	1.89821	4.94184	3.49248	5.93404	3.48051	FALSE	FALSE	FALSE	FALSE
MMETSP0851-20130426|29254_1	0.320058	18.285	16.0848	36.4624	22.0659	1.99715	11.5106	8.69591	31.3434	6.06133	4.2321	14.2418	7.37234	5.88312	7.80463	14.1824	0.816078	13.6061	0.328761	16.4514	2.16673	7.46043	0.472582	2.24671	31.456	11.7369	2.67757	7.37746	4.69869	Centrin 4	ko:K10840,ko:K16465	EF-hand_1,EF-hand_5,EF-hand_6,EF-hand_7,EF-hand_8	Name=Pfam:EF_hand_4; Dbxref=Pfam:PF13405.1; Description=ef-hand domain; Ontology_term=InterPro:IPR002048; score=38.70; evalue=3.60e-10;
MMETSP0851-20130426|69645_1	0.320058	10.7138	4.67422	6.57263	5.89431	3.99429	11.8779	6.17129	3.42819	1.55863	1.20917	0.209438	4.9149	2.39002	5.88546	6.22642	0.272026	0.25672	4.49307	2.48845	5.10729	5.37845	7.87636	0.674012	2.71173	4.53002	5.35513	9.78315	3.13246	FALSE	FALSE	FALSE	Name=Pfam:KR; Dbxref=Pfam:PF08659.5; Description=kr domain; Ontology_term=InterPro:IPR013968; score=26.90; evalue=2.90e-06;
MMETSP0851-20130426|10787_1	0.320397	12.4281	13.8852	12.0498	14.6602	10.1189	14.5719	9.25693	6.04014	4.84907	25.9972	5.65483	19.133	11.5824	7.42079	3.97799	7.07268	2.43884	3.17802	4.56215	8.82169	12.1449	11.657	6.51545	4.33876	10.2955	6.86854	10.4247	6.78699	FALSE	FALSE	FALSE	FALSE
MMETSP0851-20130426|194151_1	0.320397	84.1393	82.4862	68.3866	95.5181	80.4184	71.8799	83.8734	106.764	62.172	57.6371	69.7428	56.1702	72.9875	84.9553	87.6888	310.654	28.6242	19.8352	50.1837	62.0614	137.064	130.433	53.921	80.8095	66.303	72.2943	57.4159	60.7349	FALSE	FALSE	FALSE	Name=Pfam:DnaJ; Dbxref=Pfam:PF00226.26; Description=dnaj domain; Ontology_term=InterPro:IPR001623; score=45.30; evalue=4.70e-12;
MMETSP0851-20130426|103066_1	0.322156	10.9995	17.597	4.22526	13.1488	5.05944	9.06152	15.5685	14.6922	7.79314	10.0764	15.289	5.26596	12.8693	13.3063	9.51259	7.34471	40.305	39.3417	12.857	13.0004	14.2269	10.5543	12.1322	16.2704	10.5014	10.8267	12.3492	10.6156	FALSE	FALSE	FALSE	FALSE
MMETSP0851-20130426|86467_1	0.322156	0.999958	1.51225	3.12982	0.755681	1.73086	0.489812	3.36616	3.59144	0	2.61987	0	5.96809	0	1.27945	2.24843	0.816078	0	1.97257	0.691235	1.3929	5.55194	5.1984	6.74012	6.77932	0.20591	2.44473	16.5191	0.870128	FALSE	FALSE	FALSE	FALSE
MMETSP0851-20130426|145498_1	0.322156	3.71413	7.28628	4.38175	9.82385	5.32572	5.26548	5.61026	10.6111	4.67589	6.44891	0.418876	11.4096	14.524	7.93257	5.88051	19.0418	0.385079	0.109587	2.07371	3.86916	13.7064	8.97905	4.71808	0.813518	5.55957	4.54022	4.33025	2.95843	FALSE	FALSE	FALSE	FALSE
MMETSP0851-20130426|195484_1	0.322302	37.7127	21.7214	21.4393	21.0079	13.5806	18.4904	16.1295	24.6503	30.3067	21.7651	12.3568	10.1809	34.1957	19.8314	18.6793	15.5055	3.33735	4.60265	4.83865	14.2385	12.1449	11.4995	18.423	7.59284	20.3851	6.86854	13.4719	8.70128	-	-	-	FALSE
MMETSP0851-20130426|123885_1	0.322757	13.5709	14.5726	10.6414	24.1818	25.6966	20.2047	21.319	15.0187	17.8376	21.362	58.8521	25.9787	34.931	33.1377	19.0252	32.3711	44.2841	159.997	32.3498	119.789	44.5891	172.335	42.9121	41.2182	32.1219	200.817	54.529	183.075	Ferredoxin-dependent bilin reductase	-	Fe_bilin_red	Name=Pfam:Fe_bilin_red; Dbxref=Pfam:PF05996.7; Description=ferredoxin-dependent bilin reductase; Ontology_term=InterPro:IPR009249; score=192.30; evalue=7.30e-57;
MMETSP0851-20130426|195327_1	0.322757	19.5706	19.6592	18.9354	20.7057	14.1132	25.4702	20.758	16.9777	8.48587	3.82904	11.5191	14.3936	10.1116	17.2725	12.7988	15.5055	15.0181	5.041	17.0044	11.4527	12.4919	4.72582	17.5243	11.6604	14.8255	9.42969	7.53784	10.0935	Belongs to the DHHC palmitoyltransferase family	ko:K20029	DHHC	Name=Pfam:zf-DHHC; Dbxref=Pfam:PF01529.15; Description=dhhc palmitoyltransferase; Ontology_term=InterPro:IPR001594; score=94.10; evalue=5.40e-27;
MMETSP0851-20130426|81676_1	0.322757	15.9993	12.7854	12.3628	15.567	12.2492	17.6332	19.3554	13.5495	6.92724	8.26266	11.5191	7.54787	13.9724	11.2591	10.0315	6.2566	10.9106	3.94513	12.7187	7.73833	8.32792	6.77367	11.0089	11.3893	6.58912	5.93721	5.4529	3.65454	endoplasmic reticulum signal peptide binding	ko:K03104	SRP14	Name=Pfam:SRP14; Dbxref=Pfam:PF02290.10; Description=signal recognition particle 14kd protein; Ontology_term=InterPro:IPR003210; score=59.10; evalue=2.70e-16;
MMETSP0851-20130426|117457_1	0.322757	43.9982	61.4522	70.734	50.3283	87.8744	45.5525	78.5437	74.6039	50.0493	189.034	136.554	82.5	100.748	115.918	183.852	153.151	771.186	820.368	315.203	352.094	260.768	350.971	113.459	58.5733	82.1581	269.736	227.578	326.124	The coatomer is a cytosolic protein complex that binds to dilysine motifs and reversibly associates with Golgi non- clathrin-coated vesicles, which further mediate biosynthetic protein transport from the ER, via the Golgi up to the trans Golgi network	ko:K05236	COPI_C,Coatomer_WDAD,WD40	Name=Pfam:Coatomer_WDAD; Dbxref=Pfam:PF04053.9; Description=coatomer wd associated region; Ontology_term=InterPro:IPR006692; score=355.00; evalue=4.80e-106;
MMETSP0851-20130426|172266_1	0.322757	6.85686	9.21096	5.79017	9.82385	3.46172	14.2045	7.4336	10.9376	10.3909	1.00764	9.63415	5.09043	2.94156	6.14135	6.74529	2.99229	1.41196	0.657522	2.48845	4.95253	6.41944	1.7328	13.0309	6.50814	6.79503	3.84173	34.8023	6.78699	FALSE	FALSE	FALSE	FALSE
MMETSP0851-20130426|93769_1	0.324136	26.5703	40.2807	38.8098	27.9602	32.8863	22.8987	26.0877	20.0794	15.4131	50.1806	20.106	28.7872	59.1989	36.5922	132.139	112.891	175.596	398.897	52.3956	486.895	164.997	725.098	31.9032	17.8974	19.5614	547.504	153.002	416.617	Permease family	ko:K03458	Xan_ur_permease	Name=Pfam:Xan_ur_permease; Dbxref=Pfam:PF00860.15; Description=permease family; Ontology_term=InterPro:IPR006043; score=231.10; evalue=1.40e-68;
MMETSP0851-20130426|47781_1	0.324136	8.14252	6.46142	7.98105	4.38295	2.796	3.9185	7.01283	7.99911	13.8545	4.43362	1.6755	11.234	2.75771	4.09423	4.84277	4.08039	7.18815	1.42463	6.63586	2.94056	2.94947	2.52044	2.47138	14.6433	8.44231	1.74624	0.962277	2.43636	Flavoprotein (FP) subunit of succinate dehydrogenase (SDH) that is involved in complex II of the mitochondrial electron transport chain and is responsible for transferring electrons from succinate to ubiquinone (coenzyme Q)	ko:K00234	FAD_binding_2,Succ_DH_flav_C	Name=Pfam:FAD_binding_2; Dbxref=Pfam:PF00890.19; Description=fad binding domain; Ontology_term=InterPro:IPR003953; score=49.70; evalue=2.10e-13;
MMETSP0851-20130426|61514_1	0.324136	5.14264	11.5481	11.8933	10.5795	5.99144	6.97982	10.6595	10.6111	9.00541	15.3162	10.053	9.47873	9.19238	11.0032	13.8365	22.5782	37.7378	126.463	17.6956	14.3933	5.03145	19.0608	12.5816	8.40635	15.0314	10.361	14.7549	15.1402	Polyketide cyclase / dehydrase and lipid transport	-	Polyketide_cyc	Name=Pfam:Polyketide_cyc; Dbxref=Pfam:PF03364.15; Description=polyketide cyclase / dehydrase and lipid transport; Ontology_term=InterPro:IPR005031; score=56.80; evalue=1.90e-15;
MMETSP0851-20130426|128651_1	0.324136	10.7138	9.48591	14.5537	8.31249	9.45315	9.18397	14.7269	12.8965	17.6645	1.00764	7.53977	4.9149	13.0532	5.75751	8.3019	5.44052	2.05376	1.42463	3.17968	5.88113	4.51096	7.24625	8.53748	4.33876	8.85413	8.49836	14.2738	9.04933	translation activator activity	-	ABC_tran,ABC_tran_CTD,ABC_tran_Xtn	Name=Pfam:ABC_tran; Dbxref=Pfam:PF00005.22; Description=abc transporter; Ontology_term=InterPro:IPR003439; score=47.00; evalue=2.60e-12;
MMETSP0851-20130426|89883_1	0.324136	10.4281	6.87385	10.0154	8.91703	4.66001	5.38793	3.50641	12.8965	10.3909	4.63515	1.25663	5.79255	4.96389	4.73395	2.24843	67.4625	2.95228	1.75339	1.65897	3.40486	11.9714	35.1286	6.96479	5.42345	7.82458	6.05363	5.77366	5.04674	FALSE	FALSE	FALSE	FALSE
MMETSP0851-20130426|134020_1	0.324136	42.284	35.1941	23.9431	32.0409	41.2743	32.0827	36.1862	31.5067	31.8653	60.4585	7.12089	27.9096	39.5272	49.6426	55.6919	35.0914	177.907	95.8886	145.989	98.8958	65.9293	81.4416	42.6874	18.1686	37.2697	80.4434	84.0388	123.558	FALSE	FALSE	FALSE	Name=Pfam:PQQ_2; Dbxref=Pfam:PF13360.1; Description=pqq-like domain; score=33.90; evalue=2.00e-08;
MMETSP0851-20130426|87475_1	0.324136	5.5712	2.47458	3.12982	2.41818	4.92629	2.32661	1.54282	21.8751	0.173181	6.44891	0.209438	2.28192	2.20617	2.81478	3.11321	108.538	0	0.328761	0.552988	0	21.1668	18.9033	0.898683	8.13518	2.88274	0.349248	1.92455	1.3922	FALSE	FALSE	FALSE	FALSE
MMETSP0851-20130426|195002_1	0.324136	23.2847	30.2449	29.4203	18.892	39.1441	23.511	30.9967	31.9964	12.469	19.7498	20.7344	17.9043	24.084	30.5788	25.9434	8.16078	29.5228	38.5746	28.7554	14.7028	16.1353	19.0608	33.2513	12.2028	22.0324	12.4565	15.7172	18.7948	FALSE	FALSE	FALSE	Name=Pfam:zf-GRF; Dbxref=Pfam:PF06839.7; Description=grf zinc finger; Ontology_term=InterPro:IPR010666; score=135.60; evalue=3.40e-40;
MMETSP0851-20130426|20422_1	0.324136	1.57136	5.77403	2.03439	2.11591	1.864	0.979624	2.52462	7.50937	7.44678	2.61987	0	2.28192	8.27314	3.7104	3.63208	34.5473	0	1.31504	1.24422	1.3929	17.0028	11.0269	0	0.542345	2.47092	2.56115	3.20759	2.61038	FALSE	FALSE	FALSE	FALSE
MMETSP0851-20130426|29311_1	0.324136	4.99979	1.92468	5.79017	5.4409	1.99715	5.14303	1.54282	2.61195	0.173181	0	1.25663	5.26596	6.98621	3.58245	2.42139	0	0.12836	0.986283	0.414741	5.10729	1.56148	0.630109	2.24671	6.77932	1.23546	0.349248	9.46239	2.08831	FALSE	FALSE	FALSE	FALSE
MMETSP0851-20130426|62225_1	0.324136	10.8567	20.759	12.5193	13.3	12.9149	13.4698	17.1113	8.48885	12.2958	27.8109	32.4629	16.5	8.64084	17.6564	32.1699	20.1299	1.41196	9.09572	12.4422	24.2983	18.3908	13.3898	19.5463	36.6083	22.0324	24.4473	17.321	17.9246	FALSE	FALSE	FALSE	FALSE
MMETSP0851-20130426|167487_1	0.325082	11.4281	16.6347	11.4239	16.7761	12.2492	14.327	15.9892	15.0187	19.2231	15.1146	9.84359	15.4468	21.3263	12.9224	19.3711	2.17621	31.4482	114.847	16.0367	16.8696	16.4823	12.7597	20.6697	13.8298	17.0905	14.552	15.236	10.0935	Anaphase-promoting complex, subunit 10 (APC10)	ko:K03357	ANAPC10	Name=Pfam:adh_short; Dbxref=Pfam:PF00106.20; Description=short chain dehydrogenase; Ontology_term=InterPro:IPR002198; score=47.10; evalue=2.20e-12;
MMETSP0851-20130426|193426_1	0.325082	16.9993	28.0453	84.0358	68.767	7.98858	9.30643	4.76872	9.14184	11.4299	12.2932	0.628314	14.7447	11.9501	7.42079	13.4906	9.52092	23.8749	11.7258	9.95379	6.80973	7.46043	5.1984	15.0529	10.0334	15.4432	3.95814	7.53784	6.09089	Flagellin is the subunit protein which polymerizes to form the filaments of bacterial flagella	ko:K02406	Flagellin_C,Flagellin_IN,Flagellin_N	Name=Pfam:Flagellin_N; Dbxref=Pfam:PF00669.15; Description=bacterial flagellin n-terminal helical region; Ontology_term=InterPro:IPR001029; score=127.50; evalue=2.70e-37;
MMETSP0851-20130426|71051_1	0.325082	20.7134	20.2091	17.3705	16.4738	24.6315	14.2045	11.6413	14.2025	14.5472	14.9131	4.60764	12.9894	4.59619	19.9594	22.4843	10.065	11.424	23.2324	59.5845	14.2385	16.4823	17.0129	14.1542	16.2704	29.0333	11.8744	22.1324	11.4857	Possible lysine decarboxylase	-	Lysine_decarbox	Name=Pfam:Lysine_decarbox; Dbxref=Pfam:PF03641.9; Description=possible lysine decarboxylase; Ontology_term=InterPro:IPR005269; score=74.80; evalue=4.70e-21;
MMETSP0851-20130426|103323_1	0.325082	21.2848	20.3466	17.84	18.7409	18.5069	37.838	22.1605	14.2025	12.1227	6.24738	16.5456	20.0106	35.2987	12.5386	15.3931	5.71255	10.1404	5.58894	38.8474	7.58356	16.1353	13.0748	10.1102	20.0668	17.2964	5.47155	17.1606	8.35322	FALSE	FALSE	FALSE	FALSE
MMETSP0851-20130426|164703_1	0.325082	1.99992	2.88702	0.782456	2.11591	0.399429	1.46944	9.39719	0	0	0.604585	11.7285	1.05319	2.75771	1.79123	1.90252	0	0	1.20546	0.138247	1.3929	3.12297	4.56829	2.02204	0	0.82364	1.74624	0.641518	2.78441	FALSE	FALSE	FALSE	FALSE
MMETSP0851-20130426|7606_1	0.32522	75.4254	61.5897	53.52	66.0465	63.7755	91.9622	51.0534	54.851	76.546	48.9714	34.1384	46.3404	61.2213	45.1645	51.7139	98.4735	16.3017	21.9174	36.359	36.8344	90.2191	51.1963	84.9255	37.693	56.8311	42.7246	85.1615	44.0285	fatty acid beta-oxidation using acyl-CoA oxidase	ko:K00232	ACOX,Acyl-CoA_dh_1,Acyl-CoA_dh_M,Acyl-CoA_ox_N	Name=Pfam:ACOX; Dbxref=Pfam:PF01756.14; Description=acyl-coa oxidase; Ontology_term=InterPro:IPR002655; score=96.10; evalue=1.50e-27;
MMETSP0851-20130426|54324_1	0.32522	8.28537	4.39926	6.57263	6.34772	4.52686	9.67379	7.15308	1.46922	0	1.81376	0.209438	3.8617	5.69928	4.60601	5.18869	1.0881	15.6599	20.164	12.0275	6.34543	4.51096	1.10269	4.26874	1.62704	2.88274	5.00588	4.33025	4.52466	initiation factor 4E	ko:K03259	IF4E	Name=Pfam:IF4E; Dbxref=Pfam:PF01652.13; Description=eukaryotic initiation factor 4e; Ontology_term=InterPro:IPR001040; score=36.60; evalue=2.80e-09;
MMETSP0851-20130426|140470_1	0.32522	1.57136	2.19963	1.40842	2.72045	3.728	1.95925	0.561026	6.36664	0	7.45655	0.418876	0.702128	3.12541	1.27945	3.11321	23.1222	0	0.547935	1.38247	1.3929	11.9714	18.9033	0.224671	7.05049	1.23546	3.02681	3.84911	1.56623	FALSE	FALSE	FALSE	Name=Pfam:NHL; Dbxref=Pfam:PF01436.16; Description=nhl repeat; Ontology_term=InterPro:IPR001258; score=49.20; evalue=2.20e-13;
MMETSP0851-20130426|5809_1	0.331819	7.57111	5.63655	3.5993	7.70794	4.12743	5.75529	3.92718	8.81534	0.519543	2.41834	10.6813	4.3883	2.57387	2.94273	9.68555	1.90418	17.2002	5.041	13.5482	3.86916	5.20495	1.10269	7.18946	1.08469	2.67683	3.49248	3.52835	9.74543	FALSE	FALSE	FALSE	Name=Pfam:adh_short; Dbxref=Pfam:PF00106.20; Description=short chain dehydrogenase; Ontology_term=InterPro:IPR002198; score=27.80; evalue=1.80e-06;
MMETSP0851-20130426|191247_1	0.332459	27.5703	28.1828	24.2561	29.6227	26.8949	19.47	22.8618	20.8956	26.1503	73.3563	66.1824	31.0692	23.1648	21.6227	22.1384	39.9878	41.8453	10.4108	30.5526	17.4886	33.6587	9.45163	30.5552	19.5244	47.5652	17.5788	22.1324	23.4934	Belongs to the protein kinase superfamily	-	Pkinase	Name=Pfam:Pkinase; Dbxref=Pfam:PF00069.20; Description=protein kinase domain; Ontology_term=InterPro:IPR000719; score=184.80; evalue=1.40e-54;
MMETSP0851-20130426|148638_1	0.332459	35.8556	34.6442	32.5502	36.4238	32.4869	24.0008	40.5341	30.8537	21.6476	21.9666	20.9438	21.766	22.6133	20.9829	20.5818	22.0341	5.26275	5.15059	14.5159	17.4886	28.8007	13.8624	27.4098	46.6417	27.386	15.949	26.623	19.8389	FALSE	FALSE	FALSE	FALSE
MMETSP0851-20130426|124986_1	0.332459	2.14277	4.12431	4.06877	4.53408	2.52972	3.9185	2.38436	3.75468	8.13951	3.22445	0	4.73936	6.98621	4.35012	1.90252	3.53634	0.12836	0.876696	0.276494	2.3215	2.94947	3.4656	2.47138	0	2.67683	1.74624	3.04721	0.870128	FALSE	FALSE	FALSE	FALSE
MMETSP0851-20130426|113199_1	0.334191	4.85694	4.81169	3.28631	3.325	3.728	8.69416	2.52462	3.1017	6.92724	2.61987	3.56045	0.702128	5.88312	3.83834	6.57234	3.53634	9.24191	7.5615	2.62669	2.01196	2.60247	1.7328	1.79737	11.6604	4.94184	1.97907	1.92455	1.04415	alpha-galactosidase activity	ko:K07407	Melibiase_2	FALSE
MMETSP0851-20130426|178484_1	0.337702	24.999	19.3842	20.0309	23.4261	24.8977	36.0012	19.7762	23.0178	11.2568	13.7039	6.91145	33.8777	31.0702	24.1816	28.5378	17.1376	31.1914	20.2736	17.6956	8.66692	27.2392	7.87636	16.401	8.67753	24.0915	8.14911	9.14163	8.1792	FALSE	FALSE	FALSE	FALSE
MMETSP0851-20130426|151446_1	0.339489	16.5707	13.4727	14.2407	12.8466	7.32287	9.79624	14.8672	12.2435	6.06133	8.26266	2.51326	7.37234	15.0755	13.3063	12.1069	8.16078	0.770159	3.06844	7.46534	9.28599	17.1763	10.5543	8.98683	3.25407	10.7073	7.91628	12.8304	10.0935	FALSE	FALSE	FALSE	FALSE
MMETSP0851-20130426|176809_1	0.339527	17.9992	15.8098	16.1186	21.6125	13.98	9.79624	11.0803	11.5905	11.7763	22.7727	14.0323	12.2872	33.4603	13.0504	15.2201	12.2412	59.6873	181.586	21.0136	18.4172	18.0438	31.3479	9.66084	7.86401	15.6492	26.31	8.33973	12.1818	Aldo/keto reductase family	-	Aldo_ket_red	Name=Pfam:Aldo_ket_red; Dbxref=Pfam:PF00248.16; Description=aldo/keto reductase family; Ontology_term=InterPro:IPR023210; score=193.90; evalue=2.10e-57;
MMETSP0851-20130426|190697_1	0.339527	14.8565	16.4972	17.6835	13.1488	11.9829	15.9189	11.9218	19.2632	4.50271	31.8415	16.9645	12.1117	15.627	18.0402	14.8742	50.5969	7.05979	14.1367	10.645	19.3458	29.6682	50.2512	18.1983	19.5244	12.5605	22.119	12.9907	16.5324	alpha/beta hydrolase fold	-	Abhydrolase_6	Name=Pfam:Abhydrolase_6; Dbxref=Pfam:PF12697.2; Description=alpha/beta hydrolase family; score=104.30; evalue=7.60e-30;
MMETSP0851-20130426|8525_1	0.339527	75.2826	74.65	107.666	165.948	50.1949	66.6144	87.0993	100.397	94.9032	16.9284	115.819	147.622	109.941	79.1978	96.1637	17.6817	173.286	401.856	139.63	91.6218	67.4908	17.0129	145.811	34.1678	84.8349	63.5631	48.595	127.213	Ubiquitin-2 like Rad60 SUMO-like	ko:K02977,ko:K08770	ubiquitin	Name=Pfam:ubiquitin; Dbxref=Pfam:PF00240.18; Description=ubiquitin family; Ontology_term=InterPro:IPR000626; score=62.30; evalue=1.70e-17;
MMETSP0851-20130426|70285_1	0.340451	11.1424	10.5857	10.9544	11.7886	6.25772	13.5923	8.41539	7.01963	12.2958	2.01528	2.72269	6.31915	17.0978	6.90902	7.26416	2.72026	1.02688	2.5205	1.65897	2.47626	6.76643	6.30109	5.84144	5.9658	4.32411	4.19097	3.20759	4.69869	Stress responsive A/B Barrel Domain	-	Dabb	Name=Pfam:Dabb; Dbxref=Pfam:PF07876.7; Description=stress responsive a/b barrel domain; Ontology_term=InterPro:IPR013097; score=55.50; evalue=5.30e-15;
MMETSP0851-20130426|11307_1	0.340905	60.5689	54.0284	50.7031	43.9806	55.1212	57.0631	47.2665	47.0152	32.9044	29.4231	34.9761	49.5	42.1011	38.6393	35.8019	23.9383	11.9375	15.8901	24.3315	30.7985	36.7816	26.6221	37.7447	35.7948	59.9198	34.6919	29.3494	36.8934	FALSE	FALSE	FALSE	Name=Pfam:PUF; Dbxref=Pfam:PF00806.14; Description=pumilio-family rna binding repeat; Ontology_term=InterPro:IPR001313; score=125.30; evalue=1.00e-37;
MMETSP0851-20130426|189802_1	0.341867	15.1422	10.3108	11.4239	14.0557	40.8749	11.8779	22.4411	38.3631	46.7589	33.8568	119.799	28.2606	66.0013	9.21202	30.0944	85.6882	3.97915	12.9313	7.0506	7.11926	27.0657	14.0199	71.4453	51.2516	48.5947	14.7848	30.3117	14.7922	FALSE	FALSE	FALSE	FALSE
MMETSP0851-20130426|4951_1	0.342856	16.9993	14.5726	11.1109	12.8466	10.9177	16.6536	21.319	12.8965	17.3181	27.8109	13.8229	14.0426	41.5496	12.7945	26.2893	23.6663	75.8606	74.8479	23.6403	34.6677	25.3307	30.5603	15.9516	13.8298	9.88368	23.1668	24.0569	19.6649	SNARE associated Golgi protein	-	SNARE_assoc	Name=Pfam:SNARE_assoc; Dbxref=Pfam:PF09335.6; Description=snare associated golgi protein; Ontology_term=InterPro:IPR015414; score=65.20; evalue=5.30e-18;
MMETSP0851-20130426|178261_1	0.345015	25.1418	37.2563	19.5614	28.4136	25.4303	27.5519	30.9967	24.3238	19.9158	39.9026	22.2004	29.4894	44.4911	24.5654	27.1541	39.4438	34.1437	86.5737	39.2622	94.098	53.958	115.625	23.1411	20.0668	27.1801	82.4225	51.4818	77.2673	RNA recognition motif 2	-	RRM_1,RRM_2	Name=Pfam:RRM_2; Dbxref=Pfam:PF04059.7; Description=rna recognition motif 2; Ontology_term=InterPro:IPR007201; score=124.50; evalue=1.10e-36;
MMETSP0851-20130426|190337_1	0.345015	174.85	141.051	143.502	160.053	247.513	230.946	136.61	238.994	178.03	113.259	133.412	261.367	234.222	151.231	123.145	327.247	43.1289	34.9583	98.5702	113.134	219.128	122.084	156.146	206.091	254.093	93.2492	221.965	108.07	cysteine-type peptidase activity	ko:K01363,ko:K01365,ko:K01366,ko:K08568	Inhibitor_I29,Peptidase_C1	Name=Pfam:Peptidase_C1; Dbxref=Pfam:PF00112.18; Description=papain family cysteine protease; Ontology_term=InterPro:IPR000668; score=159.10; evalue=1.30e-46;
MMETSP0851-20130426|195178_1	0.345015	41.284	31.8947	24.4126	42.0159	46.4669	45.3076	36.607	87.174	25.9771	28.0124	28.2741	28.2606	31.0702	38.2555	33.3806	374.58	11.0389	13.26	22.8108	30.0247	102.711	123.501	38.4187	55.0481	29.4451	20.8385	33.5193	18.4467	FALSE	FALSE	FALSE	Name=Pfam:Mg_trans_NIPA; Dbxref=Pfam:PF05653.9; Description=magnesium transporter nipa; Ontology_term=InterPro:IPR008521; score=46.00; evalue=2.90e-12;
MMETSP0851-20130426|108470_1	0.345015	14.2851	3.98683	11.5803	10.8818	11.5834	13.4698	9.25693	26.6093	11.6031	1.4107	17.1739	17.9043	4.96389	16.3769	10.0315	6.52863	30.0362	7.5615	10.3685	7.42879	14.4004	5.67098	7.6388	10.8469	5.14775	9.31327	5.13214	9.22335	FALSE	FALSE	FALSE	FALSE
MMETSP0851-20130426|58919_1	0.34759	2.42847	7.69871	0.782456	0.604545	4.52686	2.0817	1.40257	1.14273	3.80998	6.04585	0.209438	1.05319	7.35391	2.68684	5.88051	3.80837	17.0719	18.7394	4.42391	3.2501	1.90848	0.787636	1.79737	0	6.38321	1.51341	4.16987	2.61038	FALSE	FALSE	FALSE	FALSE
MMETSP0851-20130426|92836_1	0.34759	44.4267	47.0171	39.5923	39.4465	51.5264	32.5725	42.3575	31.3434	34.2898	38.895	45.6575	46.3404	50.7419	47.7234	24.0409	46.2444	7.05979	14.6847	27.6494	30.0247	30.8827	33.0807	35.498	31.1849	43.447	35.6233	50.5195	28.8882	FALSE	FALSE	FALSE	FALSE
MMETSP0851-20130426|9174_1	0.34759	14.8565	19.6592	17.6835	15.7182	13.1812	14.2045	12.0621	11.4273	3.98316	16.7269	28.2741	13.867	28.3125	11.643	28.7107	22.3061	3.85079	4.38348	4.83865	12.3813	13.0124	10.7118	19.9957	16.5415	17.9142	10.5938	10.4247	14.7922	FALSE	FALSE	FALSE	FALSE
MMETSP0851-20130426|6984_1	0.348828	62.7117	68.8759	74.3333	78.8931	71.6309	57.9203	67.7439	66.1151	54.8984	120.917	61.9936	43.3564	74.826	74.08	79.2139	77.5275	58.7888	13.4792	78.3861	36.3701	52.0495	35.4436	69.4232	57.7598	72.0685	52.7364	62.2272	58.4726	FALSE	FALSE	FALSE	FALSE
MMETSP0851-20130426|188845_1	0.34931	35.5699	32.4446	23.9431	41.5624	42.7389	23.8783	33.9421	17.1409	20.089	73.1548	75.8166	22.2926	69.4944	123.85	199.246	150.43	1049.08	1142.23	901.371	542.921	655.303	503.142	28.0838	39.0489	38.5052	388.596	523.799	585.074	FALSE	FALSE	FALSE	Name=Pfam:LRR_4; Dbxref=Pfam:PF12799.2; Description=leucine rich repeats (2 copies); Ontology_term=InterPro:IPR025875; score=40.50; evalue=1.30e-10;
MMETSP0851-20130426|171444_1	0.352838	3.42843	2.47458	1.56491	2.26704	2.796	2.57151	4.06744	6.36664	0	4.2321	0.209438	0.351064	0	2.17506	1.72956	21.4901	0.25672	0	0.691235	0.773833	6.93993	15.1226	3.59473	2.16938	2.47092	2.2119	0.160379	1.74026	FALSE	FALSE	FALSE	FALSE
MMETSP0851-20130426|64809_1	0.352838	30.1416	27.3579	31.2982	30.9829	24.3652	29.8785	24.5449	16.3247	16.7986	43.5301	20.3155	21.4149	37.5049	21.7506	17.1227	1.36013	22.463	5.26018	31.5203	11.298	21.6873	8.50647	21.5684	20.6091	31.0924	18.5101	27.5853	12.5298	FALSE	FALSE	FALSE	Name=Pfam:PRCC_Cterm; Dbxref=Pfam:PF10253.4; Description=mitotic checkpoint protein prcc_cterm; Ontology_term=InterPro:IPR018800; score=51.60; evalue=6.70e-14;
MMETSP0851-20130426|205_1	0.352838	0.714256	0.549908	2.81684	0.604545	3.86115	0	1.96359	0.652989	0	0.201528	2.93213	0	12.8693	2.04712	3.45912	3.53634	7.31651	3.28761	2.90319	0.4643	0	0.157527	6.51545	2.71173	4.73593	0.349248	0	1.56623	FALSE	FALSE	FALSE	Name=Pfam:PT; Dbxref=Pfam:PF04886.7; Description=pt repeat; Ontology_term=InterPro:IPR006970; score=26.80; evalue=2.10e-06;
MMETSP0851-20130426|38160_1	0.356847	8.14252	9.89834	19.8744	9.97499	3.19543	8.69416	3.2259	4.40767	0	2.61987	0	0.351064	5.88312	1.66328	4.49686	1.36013	8.72847	0.328761	4.9769	1.23813	0.346997	1.26022	2.24671	8.13518	4.32411	2.67757	3.36797	0.174026	Chlorophyll A-B binding protein	-	Chloroa_b-bind	Name=Pfam:Chloroa_b-bind; Dbxref=Pfam:PF00504.16; Description=chlorophyll a-b binding protein; Ontology_term=InterPro:IPR022796; score=39.90; evalue=4.20e-10;
MMETSP0851-20130426|194581_1	0.360228	39.2841	38.631	30.2028	32.9477	28.4926	26.8172	42.638	20.8956	26.3235	16.7269	30.1591	19.8351	22.4294	27.6361	34.9372	14.4174	39.5348	141.806	28.0642	20.5839	23.9428	8.97905	35.2733	23.592	39.3288	18.743	31.1136	21.2311	FALSE	FALSE	FALSE	FALSE
MMETSP0851-20130426|2283_1	0.360706	307.987	334.206	693.256	271.592	963.956	454.545	493.282	1108.61	1969.76	912.924	247.975	714.942	858.201	159.547	427.029	1174.34	703.925	365.034	111.427	58.5017	125.96	104.125	98.8551	1637.88	164.728	78.2315	141.294	93.7997	FALSE	FALSE	FALSE	FALSE
MMETSP0851-20130426|94594_1	0.361227	21.8562	18.4219	15.6491	18.4386	22.7675	21.7966	27.7708	21.3854	16.4522	51.7928	19.6872	18.9575	42.6526	18.2961	22.8302	40.5319	47.7498	71.5603	34.9765	32.0367	26.8922	33.3958	18.8723	15.728	28.2097	21.5369	23.255	17.4026	-	-	-	FALSE
MMETSP0851-20130426|154571_1	0.361227	2.28562	4.39926	2.03439	3.02272	2.66286	2.0817	0.42077	3.1017	0.865905	2.61987	3.97932	1.57979	2.75771	1.1515	0	10.065	0.12836	0.328761	0	1.23813	5.20495	5.51345	0.898683	2.16938	8.03049	0.698496	0.320759	0.174026	FALSE	FALSE	FALSE	FALSE
MMETSP0851-20130426|195195_1	0.361227	21.2848	35.3316	22.3782	24.4841	34.8835	20.3272	34.5031	25.1401	33.9435	24.1834	24.9231	22.117	21.8779	21.6227	33.3806	10.065	38.7647	17.9723	29.5849	19.6553	19.6053	20.321	13.0309	39.8624	25.9446	18.0445	22.7739	16.5324	FALSE	FALSE	FALSE	FALSE
MMETSP0851-20130426|75480_1	0.361573	14.8565	21.5839	18.3095	11.9398	9.45315	14.6944	19.6359	18.6102	6.58088	68.9227	17.8022	12.9894	14.1563	13.3063	15.739	22.0341	3.59407	9.64366	10.9215	16.0957	15.6148	18.1156	17.075	16.8127	15.8551	12.6893	17.1606	18.2727	Glycosyltransferase family 10 (fucosyltransferase) C-term	-	Glyco_transf_10	Name=Pfam:Glyco_transf_10; Dbxref=Pfam:PF00852.14; Description=glycosyltransferase family 10 (fucosyltransferase); Ontology_term=InterPro:IPR001503; score=153.60; evalue=4.60e-45;
MMETSP0851-20130426|132176_1	0.361573	1.28566	5.22412	3.91228	1.6625	3.06229	2.93887	2.52462	4.08118	4.32952	2.8214	2.30382	1.75532	2.39002	2.94273	3.80504	0.272026	0.25672	1.42463	0.96773	1.54767	1.38799	3.62313	1.34802	1.89821	2.47092	2.79398	4.81138	3.82856	FALSE	FALSE	FALSE	FALSE
MMETSP0851-20130426|173107_1	0.361573	11.2852	9.76086	7.51158	11.3352	5.99144	9.42888	8.97642	10.2846	6.92724	4.2321	6.49258	1.93085	3.67695	7.54874	9.16668	1.36013	6.16127	3.72596	8.98606	2.63103	6.24594	2.04785	11.0089	14.101	10.9132	3.95814	1.92455	4.17661	FALSE	FALSE	FALSE	FALSE
MMETSP0851-20130426|193879_1	0.361573	26.2846	16.7722	25.3516	22.3682	13.048	16.5312	15.849	12.57	11.6031	14.107	16.755	13.516	20.4071	18.8079	15.2201	22.5782	5.39111	5.58894	7.74184	13.7742	21.6873	15.7527	11.6829	10.5757	11.7369	11.0595	21.0097	7.13505	FALSE	FALSE	FALSE	FALSE
MMETSP0851-20130426|136487_1	0.364566	8.28537	8.11114	10.9544	5.13863	6.12458	5.14303	4.90898	23.0178	11.6031	8.86725	5.23595	3.15958	9.00853	3.58245	19.89	92.7609	1.15524	5.9177	3.17968	5.57159	28.8007	26.9372	5.3921	17.8974	2.47092	1.62982	2.56607	6.09089	ADP-ribosylglycohydrolase	-	ADP_ribosyl_GH	FALSE
MMETSP0851-20130426|3669_1	0.368815	125.709	73.6876	121.907	121.513	75.8915	123.555	69.5673	108.07	100.272	160.215	64.2975	59.3298	56.9928	60.9017	65.8963	368.867	6.16127	19.1777	52.3956	65.4662	138.278	127.912	38.4187	103.859	71.8626	66.7063	39.293	38.8077	phosphate ion transmembrane transport	ko:K15102	Mito_carr	Name=Pfam:Mito_carr; Dbxref=Pfam:PF00153.22; Description=mitochondrial carrier protein; Ontology_term=InterPro:IPR018108; score=116.40; evalue=3.00e-34;
MMETSP0851-20130426|3687_1	0.368815	19.2849	33.1319	21.2828	36.2727	27.1612	24.0008	31.8382	23.3443	12.1227	42.1194	51.9406	14.2181	22.6133	18.9358	22.1384	26.6586	71.8815	53.4785	27.6494	21.6673	30.5357	19.0608	31.0045	37.9642	31.2983	23.2832	35.4439	26.7999	FALSE	FALSE	FALSE	FALSE
MMETSP0851-20130426|20487_1	0.36929	57.2833	79.5992	1500.75	84.7874	391.174	206.333	271.677	337.269	411.998	654.564	276.877	1111.12	1221.85	98.9013	330.346	386.549	754.627	180.49	67.3263	39.9298	28.1067	66.1614	58.4144	324.865	79.2753	53.7842	160.7	36.5454	-	-	-	FALSE
MMETSP0851-20130426|114581_1	0.36929	3.14273	4.81169	10.3284	2.56931	7.05658	6.97982	4.62847	9.30509	13.3349	10.2779	2.72269	6.31915	8.27314	0.639724	1.38365	4.62444	18.6122	6.68481	5.52988	3.7144	1.90848	3.78065	3.37006	6.77932	3.70638	1.28058	8.66049	5.04674	-	-	-	FALSE
MMETSP0851-20130426|29690_1	0.36929	16.7136	12.098	4.06877	8.16135	6.79029	7.46963	13.8854	16.6512	2.94408	6.85197	5.44539	8.42553	11.5824	12.2827	6.05347	29.1068	1.41196	2.63009	5.11514	4.79776	24.4633	24.5742	4.71808	1.89821	5.35366	13.2714	11.2266	3.30648	proteasome subunit alpha	ko:K02729	Proteasome,Proteasome_A_N	Name=Pfam:Proteasome; Dbxref=Pfam:PF00227.21; Description=proteasome subunit; Ontology_term=InterPro:IPR001353; score=77.20; evalue=8.70e-22;
MMETSP0851-20130426|194004_1	0.36929	14.428	16.6347	22.2217	17.5318	13.048	20.5721	16.41	19.0999	12.2958	20.1528	32.044	14.5692	16.1786	15.4813	24.3868	20.402	4.36423	5.9177	10.3685	12.0718	28.6272	22.999	13.4802	9.49104	22.6501	16.5311	13.953	13.0519	Protein kinase domain containing protein	-	Pkinase	Name=Pfam:Pkinase; Dbxref=Pfam:PF00069.20; Description=protein kinase domain; Ontology_term=InterPro:IPR000719; score=207.10; evalue=2.30e-61;
MMETSP0851-20130426|122683_1	0.36929	11.9995	11.5481	12.5193	15.7182	6.79029	18.4904	14.0257	15.0187	9.00541	8.66572	1.6755	26.5053	7.90545	12.9224	8.82077	10.337	19.7674	5.58894	27.7877	1.8572	11.4509	9.76669	6.96479	27.6596	19.9733	5.1223	10.4247	9.5714	Ubiquitin-conjugating enzyme E2Q-like protein 1	ko:K10582	UQ_con	FALSE
MMETSP0851-20130426|4672_1	0.36929	47.998	51.1414	49.9207	44.7363	56.9852	42.981	53.7183	42.6075	59.7474	52.5989	41.4687	58.2766	91.0046	45.4204	61.7454	221.701	152.62	211.832	63.0407	58.966	63.1534	91.5233	61.1104	42.3029	55.1839	60.3034	53.0856	64.5635	FALSE	FALSE	FALSE	FALSE
MMETSP0851-20130426|156700_1	0.36929	19.7135	16.6347	14.2407	19.0432	14.1132	28.7764	15.1477	53.0553	14.2008	24.9895	8.16808	7.54787	22.4294	12.7945	15.3931	159.951	2.82392	3.06844	8.70957	11.1432	51.0085	34.4985	11.9075	36.3371	16.8846	8.0327	14.5945	5.74284	FALSE	FALSE	FALSE	FALSE
MMETSP0851-20130426|189673_1	0.36929	45.5695	64.2017	51.3291	65.8954	115.968	48.8587	47.8275	51.7493	26.8431	686.607	61.3653	41.4255	45.4104	59.2384	55.6919	99.5616	132.339	108.82	95.114	72.895	69.3993	68.9969	41.5641	41.2182	47.1534	61.3512	79.2275	70.1323	FALSE	FALSE	FALSE	FALSE
MMETSP0851-20130426|191920_1	0.36929	42.5697	44.8175	41.3137	34.9125	25.5635	34.7766	30.4357	42.6075	21.3013	39.298	18.2211	19.3085	52.9481	34.673	29.7485	40.8039	9.37027	6.90398	16.7279	31.8819	40.4251	26.307	51.0002	63.9968	30.4747	20.6056	35.925	17.4026	FALSE	FALSE	FALSE	FALSE
MMETSP0851-20130426|141071_1	0.36929	1.42851	2.47458	7.82456	3.92954	1.06514	3.06132	1.82334	5.06066	5.19543	10.0764	0.209438	3.51064	4.04465	2.94273	3.11321	7.07268	0.513439	1.31504	0.691235	5.88113	3.12297	4.88334	3.8194	8.67753	2.0591	3.49248	2.08493	1.56623	FALSE	FALSE	FALSE	FALSE
MMETSP0851-20130426|140719_1	0.36929	0.999958	2.47458	1.87789	2.87159	6.65715	3.06132	2.38436	7.34612	2.25135	4.83668	0	0	0.919238	3.58245	2.7673	1.36013	0.385079	0.438348	0.276494	1.23813	3.46997	0.157527	11.4582	5.15228	2.47092	0.931327	16.8398	0.870128	FALSE	FALSE	FALSE	Name=Pfam:cNMP_binding; Dbxref=Pfam:PF00027.24; Description=cyclic nucleotide-binding domain; Ontology_term=InterPro:IPR000595; score=28.20; evalue=1.10e-06;
MMETSP0851-20130426|176716_1	0.36929	9.28533	12.7854	6.57263	9.21931	11.3172	14.327	9.11668	34.1186	14.7204	2.8214	1.04719	8.42553	9.19238	15.9931	13.1447	164.032	0.898519	0.876696	7.46534	7.42879	49.9675	104.756	7.6388	27.1173	9.67777	6.98496	6.09442	2.78441	FALSE	FALSE	FALSE	FALSE
MMETSP0851-20130426|121006_1	0.36929	1.71421	11.4106	2.66035	6.19658	4.92629	5.63284	8.13488	3.1017	2.42453	5.03821	6.0737	5.26596	0.551543	3.7104	3.28617	4.35242	6.28963	1.09587	6.22112	2.01196	2.08198	1.7328	3.8194	5.9658	8.03049	2.09549	3.52835	2.95843	FALSE	FALSE	FALSE	FALSE
MMETSP0851-20130426|13890_1	0.36929	31.2844	48.6668	47.4168	37.784	41.0081	31.7153	33.2408	38.5263	42.2562	51.9943	35.8139	45.8138	52.2127	29.4273	32.3428	55.7654	26.1854	23.2324	124.837	34.2034	32.7912	46.313	79.9827	81.0806	44.0647	25.1458	38.4911	36.3713	FALSE	FALSE	FALSE	Name=Pfam:DnaJ; Dbxref=Pfam:PF00226.26; Description=dnaj domain; Ontology_term=InterPro:IPR001623; score=62.20; evalue=2.50e-17;
MMETSP0851-20130426|38271_1	0.369694	0.428554	0.962339	2.19088	1.96477	0.399429	1.22453	0.701283	0.816236	0	6.04585	0	0	0.183848	50.0264	8.3019	6.52863	3.85079	9.20531	30.1379	0.928599	2.77597	3.78065	1.57269	3.25407	0.61773	0.698496	3.20759	6.61297	FALSE	FALSE	FALSE	FALSE
MMETSP0851-20130426|96931_1	0.369748	33.7129	36.1564	33.3326	32.7965	38.4783	18.7353	28.6123	26.446	16.4522	25.9972	16.755	28.7872	10.847	32.498	17.6415	19.0418	53.526	115.286	24.7462	16.7148	32.0972	15.7527	21.5684	33.3542	29.8569	18.9758	30.9532	25.9298	FALSE	FALSE	FALSE	FALSE
MMETSP0851-20130426|146485_1	0.373191	1.28566	3.43692	4.53824	5.74317	4.12743	0.489812	3.92718	3.26494	0.346362	4.2321	2.51326	1.22872	4.96389	1.53534	1.72956	0	0.12836	0.328761	0.414741	1.3929	1.73498	1.26022	4.94275	1.62704	2.67683	2.32832	4.16987	2.61038	FALSE	FALSE	FALSE	FALSE
MMETSP0851-20130426|8948_1	0.373345	28.8559	36.9813	30.3593	26.4488	25.2972	27.9193	23.2826	31.3434	22.5135	67.512	23.0382	15.4468	24.2679	33.9054	95.6448	33.7312	81.8936	220.379	132.579	46.1204	40.0781	91.9959	20.445	28.202	25.3269	58.4408	52.1233	47.509	adenosine-phosphate deaminase activity	ko:K01490	A_deaminase	Name=Pfam:A_deaminase; Dbxref=Pfam:PF00962.17; Description=adenosine/amp deaminase; Ontology_term=InterPro:IPR001365; score=213.30; evalue=4.00e-63;
MMETSP0851-20130426|163501_1	0.373345	7.99967	7.83619	7.98105	7.70794	6.52401	11.1432	9.11668	15.182	6.23452	5.03821	1.88494	7.37234	13.6047	6.39724	4.49686	64.7422	1.79704	0.657522	4.9769	5.72636	17.8703	28.3549	8.76215	14.6433	5.14775	4.65664	8.82087	6.26492	FALSE	FALSE	FALSE	FALSE
MMETSP0851-20130426|187660_1	0.373345	2.42847	1.92468	1.87789	3.92954	3.46172	3.18378	3.2259	1.14273	2.59771	6.65044	0	1.57979	0	2.17506	2.07547	2.44824	0.12836	2.84926	0.691235	2.16673	0.693993	2.83549	1.79737	4.88111	4.1182	4.88947	2.72645	1.56623	FALSE	FALSE	FALSE	FALSE
MMETSP0851-20130426|149683_1	0.373833	20.9991	21.7214	21.2828	18.7409	17.5749	20.2047	19.9164	18.2837	20.4354	12.2932	9.21527	10.0053	33.2764	10.1076	47.217	79.1596	0.25672	4.16431	8.70957	12.6909	28.9742	17.8006	33.0266	7.05049	19.5614	4.42381	23.255	7.65712	sulfuric ester hydrolase activity	-	Sulfatase	Name=Pfam:Sulfatase; Dbxref=Pfam:PF00884.18; Description=sulfatase; Ontology_term=InterPro:IPR000917; score=132.80; evalue=1.40e-38;
MMETSP0851-20130426|170259_1	0.373833	0.428554	1.92468	0.312982	3.325	3.728	3.42868	4.76872	17.1409	9.87132	1.81376	12.9852	5.26596	10.2955	3.45451	3.63208	0.272026	1.79704	1.6438	1.52072	11.4527	8.67491	2.20538	22.4671	1.89821	4.32411	2.56115	42.6609	3.82856	FALSE	FALSE	FALSE	FALSE
MMETSP0851-20130426|1423_1	0.373833	1.14281	3.43692	2.50386	1.36023	2.66286	1.71434	4.06744	7.18287	0.173181	22.5712	2.09438	4.56383	0	1.66328	1.90252	3.53634	8.08667	12.6025	6.91235	1.54767	1.73498	0.157527	4.71808	2.44055	2.26501	1.86265	4.81138	2.26233	FALSE	FALSE	FALSE	FALSE
MMETSP0851-20130426|2786_1	0.376996	10.4281	8.38609	8.13754	10.7307	11.5834	8.69416	7.85437	4.89741	31.5189	4.03057	8.16808	6.84575	9.00853	4.22218	5.01573	0.272026	9.75534	2.19174	6.22112	3.7144	4.33746	0.787636	2.24671	7.59284	15.0314	2.32832	3.20759	2.08831	-	-	-	FALSE
MMETSP0851-20130426|6203_1	0.376996	12.9995	18.6969	9.07649	16.0204	11.0509	10.0411	11.6413	15.9982	9.17859	9.47183	14.2418	11.234	23.5325	9.7238	10.2044	11.4251	64.3083	36.3829	36.359	39.3107	13.3594	29.3001	9.43617	11.3893	18.1201	24.0981	13.4719	31.1506	FALSE	FALSE	FALSE	FALSE
MMETSP0851-20130426|108393_1	0.376996	2.85702	4.67422	5.63368	4.53408	9.05373	3.79604	4.34795	17.1409	0.173181	1.20917	2.09438	7.89894	2.75771	3.45451	3.80504	4.35242	0.25672	2.5205	0.829483	5.10729	2.42898	2.04785	3.8194	7.05049	3.50047	2.79398	4.81138	2.78441	FALSE	FALSE	FALSE	FALSE
MMETSP0851-20130426|88601_1	0.377428	2.71417	1.51225	3.28631	3.62727	2.13029	3.42868	0.140257	3.75468	0.173181	2.01528	6.49258	2.80851	0.367695	2.94273	2.24843	0	5.00603	18.5202	6.49761	1.8572	1.04099	1.26022	1.34802	0	1.02955	1.39699	1.12266	0.870128	FALSE	FALSE	FALSE	FALSE
MMETSP0851-20130426|11433_1	0.377428	32.1415	47.1546	41.7831	39.8999	44.8692	41.2667	52.5962	51.7493	30.653	41.3133	90.2678	28.6117	68.759	40.3026	51.7139	36.7235	118.091	223.448	51.4279	57.4184	38.8636	48.2033	44.9341	45.0147	59.508	45.8679	47.6327	53.2518	FALSE	FALSE	FALSE	FALSE
MMETSP0851-20130426|160694_1	0.377428	3.42843	6.18646	7.82456	4.08068	5.85829	6.61246	5.47001	10.2846	5.36861	8.86725	7.95864	7.54787	22.4294	8.82819	10.3774	85.4162	5.13439	7.01357	6.63586	8.51216	34.8732	73.5652	9.88551	7.59284	7.20685	6.75212	9.62277	7.65712	FALSE	FALSE	FALSE	Name=Pfam:APH; Dbxref=Pfam:PF01636.18; Description=phosphotransferase enzyme family; Ontology_term=InterPro:IPR002575; score=25.40; evalue=9.30e-06;
MMETSP0851-20130426|101376_1	0.377441	19.5706	34.6442	32.2372	26.1466	41.6738	18.3679	20.758	17.9572	41.0439	16.3238	20.9438	19.484	21.3263	20.5991	31.1321	28.8348	52.2424	164.052	39.1239	27.0841	29.3212	16.6979	24.0398	73.4878	26.1506	23.3996	20.3682	19.8389	7 transmembrane sweet-taste receptor of 3 GCPR	ko:K04615	7tm_3,Peripla_BP_4	Name=Pfam:Peripla_BP_4; Dbxref=Pfam:PF13407.1; Description=periplasmic binding protein domain; Ontology_term=InterPro:IPR025997; score=81.90; evalue=4.00e-23;
MMETSP0851-20130426|83687_1	0.377441	15.4279	20.4841	29.5768	14.0557	13.5806	7.95944	10.379	29.2212	9.00541	6.65044	12.3568	4.9149	4.59619	13.946	8.12894	5.1685	0.513439	6.79439	5.11514	7.58356	14.7474	6.77367	9.66084	21.6938	11.531	7.45062	13.1511	4.17661	FALSE	FALSE	FALSE	FALSE
MMETSP0851-20130426|83604_1	0.377614	270.703	206.765	172.923	254.664	138.868	280.05	215.434	130.924	216.823	76.5808	164.828	204.67	100.381	277.384	176.415	62.566	238.749	57.7523	163.961	64.3829	152.158	137.049	155.697	209.345	136.312	127.941	104.567	117.989	FALSE	FALSE	FALSE	FALSE
MMETSP0851-20130426|135701_1	0.379374	7.71396	6.04899	3.12982	6.49886	3.19543	6.61246	5.04924	8.6521	6.23452	8.66572	3.76988	1.40426	5.69928	3.96629	7.61007	1.63216	0.513439	0.219174	1.79721	4.79776	7.63392	1.10269	5.3921	10.5757	5.97139	4.65664	4.49063	3.13246	FALSE	FALSE	FALSE	FALSE
MMETSP0851-20130426|758_1	0.379374	11.8566	3.84935	4.85123	3.325	5.05944	14.2045	3.64667	0.489741	7.2736	0	1.46607	3.33511	0.183848	3.32656	2.94026	3.53634	8.21503	0.547935	2.21195	1.8572	1.21449	0	7.41413	0.271173	3.50047	0.232832	1.28304	1.91428	FALSE	FALSE	FALSE	FALSE
MMETSP0851-20130426|163716_1	0.379374	5.71405	6.87385	2.66035	6.49886	3.59486	3.9185	5.75052	3.26494	0.173181	0	0.209438	0.351064	2.02232	4.73395	5.36164	6.2566	0.385079	0.438348	0.414741	2.3215	4.68445	1.26022	1.34802	6.23697	4.94184	1.04774	4.81138	2.08831	FALSE	FALSE	FALSE	FALSE
MMETSP0851-20130426|118156_1	0.382961	2.71417	3.5744	1.09544	6.04545	1.19829	5.14303	4.48821	2.12221	3.29044	5.03821	3.97932	7.37234	7.53775	4.60601	2.94026	7.07268	0.385079	0.438348	0.276494	1.54767	3.99046	0	6.74012	0	2.47092	0.814911	19.4059	1.56623	Flavodoxin	-	Flavodoxin_1	FALSE
MMETSP0851-20130426|5162_1	0.382961	4.28554	5.49908	4.69474	7.70794	5.99144	14.5719	7.57385	3.26494	7.10042	2.01528	10.2625	2.28192	2.94156	5.11779	7.43712	5.44052	1.15524	0.767109	2.3502	4.1787	7.46043	5.04087	5.84144	3.79642	13.796	6.86854	10.2643	4.17661	Sulfite exporter TauE/SafE	-	TauE	Name=Pfam:TauE; Dbxref=Pfam:PF01925.14; Description=sulfite exporter taue/safe; Ontology_term=InterPro:IPR002781; score=151.50; evalue=2.20e-44;
MMETSP0851-20130426|178643_1	0.382961	5.5712	2.47458	2.50386	2.72045	3.32858	7.59208	6.17129	4.08118	1.03909	0.604585	0.209438	2.45745	11.3986	6.14135	8.47485	3.26431	19.8958	2.84926	15.2072	3.7144	6.76643	4.41076	8.08814	0	3.29456	2.2119	11.0662	5.22077	FALSE	FALSE	FALSE	FALSE
MMETSP0851-20130426|192132_1	0.382961	33.9986	42.6179	41.6267	39.1443	41.9401	40.7768	39.9731	39.6691	30.3067	152.759	43.7725	51.9575	106.264	34.2892	48.7737	57.3975	75.8606	28.0543	43.6861	26.3103	48.059	30.0877	59.5377	13.0163	44.2706	25.0294	53.7271	30.8025	FALSE	FALSE	FALSE	FALSE
MMETSP0851-20130426|193322_1	0.382961	5.28549	8.936	27.8554	10.7307	6.65715	5.38793	9.53745	5.22391	2.42453	53.6066	19.8966	9.65426	5.33158	11.1312	8.12894	9.79294	1.79704	2.41091	5.39164	12.3813	14.9209	13.7049	5.61677	15.4568	9.26595	9.42969	23.0946	4.35064	FALSE	FALSE	FALSE	FALSE
MMETSP0851-20130426|89552_1	0.383349	6.71401	9.62339	5.47719	5.59204	3.86115	9.18397	7.29334	9.63158	4.84907	2.41834	8.37752	8.42553	3.4931	9.21202	9.68555	13.0573	9.24191	0.767109	7.3271	3.09533	5.89894	2.52044	3.37006	0.271173	3.91229	2.44473	4.16987	1.74026	FALSE	FALSE	FALSE	FALSE
MMETSP0851-20130426|3143_1	0.387628	0.285702	1.7872	2.03439	3.7784	0.133143	0	0.280513	12.0803	3.98316	0	0.418876	0	1.47078	1.53534	1.38365	13.8733	0	1.09587	0.414741	0.928599	12.3184	11.342	0.449341	0	1.64728	0.116416	0.641518	0.522077	FALSE	FALSE	FALSE	FALSE
MMETSP0851-20130426|192496_1	0.388417	46.5695	74.7875	43.5045	39.4465	32.3538	32.3276	47.4067	40.975	39.3121	42.724	18.8494	25.1011	43.2042	29.5552	30.7862	22.0341	13.6061	11.7258	19.2163	29.7152	34.1792	31.8205	36.3966	58.8445	53.1248	26.5428	41.0571	27.148	FALSE	FALSE	FALSE	Name=Pfam:Kinesin; Dbxref=Pfam:PF00225.18; Description=kinesin motor domain; Ontology_term=InterPro:IPR001752; score=56.80; evalue=1.30e-15;
MMETSP0851-20130426|61472_1	0.391981	15.2851	22.1338	21.5958	15.8693	23.5663	16.8985	13.6049	21.8751	24.9381	19.5483	16.9645	9.65426	15.627	13.1783	19.0252	118.059	14.633	32.4378	16.4514	41.787	48.9265	71.8324	13.4802	30.9137	30.0628	36.3218	14.7549	36.0233	FALSE	FALSE	FALSE	FALSE
MMETSP0851-20130426|159050_1	0.392867	27.5703	29.695	23.6302	24.1818	32.0875	23.2661	29.3136	72.3185	12.469	19.5483	32.044	19.3085	30.5187	22.9021	25.4246	27.2026	6.16127	7.34233	11.4745	18.7267	54.8255	26.9372	19.5463	24.1344	22.856	13.2714	33.3589	11.1376	FALSE	FALSE	FALSE	Name=Pfam:DUF3419; Dbxref=Pfam:PF11899.3; Description=protein of unknown function (duf3419); Ontology_term=InterPro:IPR021829; score=41.00; evalue=8.30e-11;
MMETSP0851-20130426|189119_1	0.39742	10.1424	9.89834	11.2674	14.5091	5.85829	6.2451	10.0985	11.917	6.4077	10.0764	5.44539	15.2713	8.27314	9.08408	12.9717	116.971	1.79704	4.60265	9.6773	8.35739	35.0467	25.5194	9.2115	4.06759	13.3841	9.77894	9.46239	13.2259	FALSE	FALSE	FALSE	FALSE
MMETSP0851-20130426|140683_1	0.397852	8.71392	13.4727	8.45052	10.1261	10.9177	11.0208	7.01283	7.83586	12.9886	25.191	11.7285	16.8511	5.88312	5.11779	9.16668	7.61673	1.54032	2.73967	7.74184	6.03589	29.4947	17.1705	12.8062	5.15228	9.26595	5.93721	14.1134	9.39738	-	-	-	FALSE
MMETSP0851-20130426|12466_1	0.397852	72.1398	49.7667	74.1768	52.7465	58.5829	66.9818	76.4398	77.8689	41.5634	55.4203	72.8844	66.1756	66.5528	66.6592	71.258	104.73	97.9385	277.803	60.8287	24.1436	68.5318	64.1136	42.4627	69.9626	59.508	38.4173	46.8308	45.7687	Serine threonine-protein phosphatase	ko:K15423	Metallophos	Name=Pfam:Metallophos; Dbxref=Pfam:PF00149.23; Description=calcineurin-like phosphoesterase; Ontology_term=InterPro:IPR004843; score=145.80; evalue=9.50e-43;
MMETSP0851-20130426|191986_1	0.397852	15.5708	19.3842	17.9965	19.3454	14.3794	18.3679	10.94	29.058	27.0162	5.84432	15.0795	16.5	15.627	11.2591	15.0472	45.1563	5.00603	7.78068	6.77411	11.917	21.8608	29.1425	12.3569	26.3038	16.4728	7.10137	16.0379	9.91945	FALSE	FALSE	FALSE	Name=Pfam:APH; Dbxref=Pfam:PF01636.18; Description=phosphotransferase enzyme family; Ontology_term=InterPro:IPR002575; score=40.30; evalue=2.60e-10;
MMETSP0851-20130426|8762_1	0.397852	36.8556	28.8702	34.4281	32.192	32.4869	24.9804	29.3136	14.8555	15.0667	16.3238	40.0027	26.8564	20.0394	29.0435	20.2359	22.8502	26.9556	27.8351	21.0136	8.20263	17.0028	13.5473	24.7138	12.7451	25.9446	11.1759	21.1701	16.8805	FALSE	FALSE	FALSE	Name=Pfam:dsrm; Dbxref=Pfam:PF00035.20; Description=double-stranded rna binding motif; Ontology_term=InterPro:IPR001159; score=40.60; evalue=2.50e-10;
MMETSP0851-20130426|138903_1	0.397852	7.71396	12.9228	11.4239	7.85908	5.72515	3.42868	8.13488	12.4068	11.7763	17.936	1.6755	14.9202	3.30926	5.24573	5.18869	26.6586	34.7855	23.1229	17.9721	13.7742	7.11343	13.2323	6.74012	8.13518	11.7369	15.1341	5.93404	11.4857	FALSE	FALSE	FALSE	FALSE
MMETSP0851-20130426|112364_1	0.397852	17.285	12.3729	13.9277	14.0557	17.708	13.5923	17.3918	26.6093	12.6422	23.5788	9.42471	11.7606	9.56008	12.0268	15.3931	27.7467	5.00603	4.82183	7.74184	15.1671	17.0028	11.342	9.88551	13.8298	13.5901	9.54611	22.4531	11.4857	FALSE	FALSE	FALSE	FALSE
MMETSP0851-20130426|42396_1	0.397852	14.7137	14.2976	11.8933	18.1363	20.3709	14.5719	10.94	19.2632	2.94408	15.7192	6.0737	13.3404	11.2147	11.515	16.9497	1.90418	1.2836	10.082	5.80638	10.0598	7.80742	8.50647	10.1102	13.2875	11.1191	8.38195	11.0662	10.6156	FALSE	FALSE	FALSE	FALSE
MMETSP0851-20130426|11289_1	0.397852	16.285	18.147	12.0498	12.8466	12.3823	12.1228	13.3244	10.7743	9.69814	9.06878	14.8701	13.1649	15.627	10.2356	14.3554	20.674	4.74931	5.26018	7.18885	11.4527	15.2678	13.0748	6.96479	7.86401	9.88368	10.2446	13.953	9.39738	FALSE	FALSE	FALSE	FALSE
MMETSP0851-20130426|118462_1	0.398915	12.7138	21.9963	16.7446	22.9727	26.8949	19.47	18.7944	10.6111	18.0108	242.237	1.25663	13.516	21.5102	41.582	33.3806	17.9537	147.999	242.406	76.3124	41.1679	35.7406	83.0168	15.5023	15.9992	14.0019	49.826	65.1141	47.509	Cytidylyltransferase family	ko:K00981	CTP_transf_1	Name=Pfam:CTP_transf_1; Dbxref=Pfam:PF01148.15; Description=cytidylyltransferase family; Ontology_term=InterPro:IPR000374; score=197.90; evalue=2.00e-58;
MMETSP0851-20130426|105607_1	0.398915	88.9963	71.2131	75.7417	92.6465	182.273	84.615	87.8006	91.0919	54.8984	29.2216	71.2089	66.5266	65.6336	169.399	179.01	23.9383	320.129	327.994	90.1371	94.5623	73.0428	102.708	49.4275	24.6767	47.5652	150.759	64.1518	133.478	FALSE	FALSE	FALSE	Name=Pfam:LRR_6; Dbxref=Pfam:PF13516.1; Description=leucine rich repeat; score=50.20; evalue=6.70e-14;
MMETSP0851-20130426|192924_1	0.399694	38.427	36.8438	35.8365	44.8874	37.28	24.2457	28.4721	38.3631	35.5021	38.0889	40.0027	32.1223	37.3211	33.9054	26.8082	43.2522	7.82995	7.89026	19.9076	27.2389	37.1286	29.1425	26.2865	41.4894	22.4442	23.0504	25.8211	23.4934	FALSE	FALSE	FALSE	FALSE
MMETSP0851-20130426|90543_1	0.399723	19.2849	23.3711	17.0575	16.7761	23.1669	16.1638	18.5139	24.3238	19.0499	21.7651	15.4984	20.1862	17.4655	15.6093	35.9749	64.1982	10.3971	18.5202	15.7602	47.5133	24.6368	28.0398	32.1279	8.13518	24.7092	26.31	29.8306	26.4519	FALSE	FALSE	FALSE	FALSE
MMETSP0851-20130426|127669_1	0.400561	48.7123	50.729	53.9895	40.9579	32.3538	39.4299	37.168	38.1998	21.994	19.1452	14.0323	34.0532	25.9225	29.6832	38.5692	76.4394	11.2957	20.0544	22.2578	28.7866	31.0562	27.0947	39.0927	27.9308	40.5643	25.2623	64.6329	31.1506	protein polyglycylation	-	TTL	Name=Pfam:TTL; Dbxref=Pfam:PF03133.10; Description=tubulin-tyrosine ligase family; Ontology_term=InterPro:IPR004344; score=188.20; evalue=1.30e-55;
MMETSP0851-20130426|161181_1	0.400561	4.28554	3.16197	2.97333	3.02272	3.59486	1.71434	2.94539	5.38716	3.29044	7.85961	5.23595	5.26596	2.39002	4.47807	0.345912	0.272026	0.12836	0.986283	1.24422	2.47626	3.29647	0.630109	5.84144	8.9487	3.70638	4.30739	6.89632	2.95843	FALSE	FALSE	FALSE	FALSE
MMETSP0851-20130426|7785_1	0.401664	35.4271	36.7063	28.6379	35.8193	55.1212	30.4908	31.2772	28.8947	27.5358	103.787	23.2476	50.0266	38.608	91.7364	105.33	97.6574	586.348	612.591	284.236	183.244	251.226	320.883	41.3394	47.184	48.5947	180.212	262.862	350.661	FALSE	FALSE	FALSE	FALSE
MMETSP0851-20130426|177197_1	0.402563	35.2842	34.0943	21.7523	31.5875	22.9006	39.4299	26.9293	29.5477	26.8431	29.0201	14.2418	32.8245	51.845	36.5922	30.4403	27.7467	33.6303	8.21902	29.3084	15.0124	26.1982	13.7049	25.6125	12.2028	23.8855	20.2564	21.0097	18.7948	FALSE	FALSE	FALSE	FALSE
MMETSP0851-20130426|176915_1	0.402563	1.57136	3.16197	3.5993	2.87159	2.52972	4.04095	2.52462	1.30598	2.7709	5.23974	0.209438	4.56383	0.183848	3.19862	1.90252	2.44824	0	1.75339	0.96773	5.10729	2.60247	2.04785	3.59473	0	3.08865	2.9104	3.68873	1.74026	FALSE	FALSE	FALSE	FALSE
MMETSP0851-20130426|126074_1	0.403525	19.7135	22.1338	14.3972	15.8693	16.9092	14.2045	15.849	20.8956	26.3235	16.9284	10.4719	10.5319	29.5995	16.121	14.3554	12.7852	5.77619	3.61637	8.70957	10.5241	17.5233	12.6022	19.9957	23.3209	17.7083	13.0386	19.7267	14.7922	FALSE	FALSE	FALSE	Name=Pfam:PLAC8; Dbxref=Pfam:PF04749.12; Description=plac8 family; Ontology_term=InterPro:IPR006461; score=40.90; evalue=2.10e-10;
MMETSP0851-20130426|7660_1	0.403782	18.9992	23.7835	21.9088	20.8568	29.9572	16.2862	28.8929	18.6102	25.6308	41.1118	40.8404	25.1011	31.0702	46.188	66.7611	83.7841	82.5354	111.669	83.2248	25.2269	48.2325	43.0049	30.1059	34.9813	28.8274	27.0085	99.5957	40.0259	-	-	Bestrophin	Name=Pfam:Bestrophin; Dbxref=Pfam:PF01062.16; Description=bestrophin rfp-tm chloride channel; Ontology_term=InterPro:IPR021134; score=87.60; evalue=6.40e-25;
MMETSP0851-20130426|122781_1	0.403782	6.1426	7.01132	12.2063	5.59204	8.25487	9.18397	5.32975	23.0178	7.10042	9.27031	6.91145	5.61702	3.8608	3.83834	10.5503	96.5693	0.898519	0.657522	4.42391	3.09533	22.7283	33.3958	3.14539	8.40635	8.64822	4.42381	6.41518	2.43636	methyltransferase activity	ko:K02169,ko:K15984	Methyltransf_11,Methyltransf_23,Methyltransf_25,SAM_MT	FALSE
MMETSP0851-20130426|142552_1	0.403782	78.4253	65.0266	66.6652	59.0942	72.4298	65.5123	59.609	44.24	40.8707	70.938	42.9348	36.1596	46.3296	82.3964	81.1165	330.24	14.633	17.9723	29.7231	36.6797	48.059	31.8205	49.2029	37.4218	55.8016	27.5906	43.7836	43.8544	FALSE	FALSE	FALSE	FALSE
MMETSP0851-20130426|87036_1	0.403871	0.428554	3.98683	3.5993	0.906817	0.932001	4.53076	0.701283	1.95897	28.4017	2.41834	7.12089	7.72341	6.61851	5.75751	5.5346	1.0881	0	20.7119	1.10598	1.8572	2.94947	10.7118	3.37006	5.9658	2.67683	4.42381	1.44342	3.48051	FALSE	FALSE	FALSE	FALSE
MMETSP0851-20130426|191640_1	0.405039	19.8563	33.5444	38.9663	32.0409	25.2972	24.1232	23.2826	20.5691	22.6867	29.0201	28.693	20.5372	48.7196	35.9525	37.3585	21.4901	191.256	216.106	68.5706	72.4307	93.3421	62.8534	39.3174	8.67753	46.7415	48.6619	51.6422	83.8803	FALSE	FALSE	FALSE	FALSE
MMETSP0851-20130426|124674_1	0.405752	2.99987	5.63655	5.00772	2.26704	3.32858	4.04095	3.2259	4.08118	1.38545	1.61223	0.418876	3.8617	10.2955	2.43095	4.15095	0	0.385079	0.438348	0.691235	2.16673	4.51096	11.9721	8.76215	0	2.67683	1.16416	1.92455	1.74026	FALSE	FALSE	FALSE	Name=Pfam:PSD4; Dbxref=Pfam:PF07631.6; Description=protein of unknown function (duf1592); Ontology_term=InterPro:IPR013042; score=70.60; evalue=1.40e-19;
MMETSP0851-20130426|3294_1	0.406965	72.8541	39.8683	69.4821	56.5249	54.8549	67.594	72.9334	92.8876	59.5743	65.6983	90.8961	118.484	45.5942	93.3997	75.4089	5.71255	29.9078	19.7257	64.1467	68.7163	610.02	37.9641	83.5775	66.9797	28.8274	49.0111	81.9539	210.397	FALSE	FALSE	FALSE	FALSE
MMETSP0851-20130426|169405_1	0.407673	9.57103	12.7854	12.8323	7.40567	13.048	13.2249	8.27514	7.01963	3.6368	17.936	4.18876	10.0053	9.19238	8.95613	6.57234	8.70484	2.69556	3.06844	5.66813	18.1077	8.32792	7.56131	7.86347	5.9658	13.1782	6.75212	14.5945	11.8337	FALSE	FALSE	FALSE	FALSE
MMETSP0851-20130426|80201_1	0.408229	17.1421	11.2731	16.5881	23.7284	10.9177	17.2659	10.0985	13.5495	8.48587	6.44891	12.5663	19.3085	16.1786	15.0975	14.3554	0.816078	10.7822	2.5205	10.7833	3.2501	5.20495	5.98603	14.6036	5.42345	8.2364	5.23872	6.73594	7.65712	RNA recognition motif	-	RRM_1	Name=Pfam:RRM_1; Dbxref=Pfam:PF00076.17; Description=rna recognition motif. (a.k.a. rrm rbd or rnp domain); Ontology_term=InterPro:IPR000504; score=44.10; evalue=1.00e-11;
MMETSP0851-20130426|150781_1	0.409073	6.4283	4.67422	6.10316	5.4409	2.26343	3.67359	5.18949	4.08118	3.11726	1.81376	11.1002	5.09043	5.33158	1.53534	1.90252	2.44824	8.34339	23.2324	4.83865	3.2501	0.867491	2.67796	5.16742	0.542345	7.00094	3.95814	1.44342	1.3922	FALSE	FALSE	FALSE	FALSE
MMETSP0851-20130426|61534_1	0.411301	11.2852	9.34843	3.75579	11.6375	19.572	10.0411	15.9892	6.69313	9.17859	14.7116	14.8701	12.1117	4.96389	310.138	606.903	96.8413	373.399	2631.4	1071.41	106.479	360.703	313.322	10.7842	63.7256	14.2078	149.944	360.693	205.698	-	-	-	FALSE
MMETSP0851-20130426|175580_1	0.412331	4.42839	5.77403	2.81684	8.31249	6.52401	6.2451	6.4518	10.7743	10.7372	2.41834	7.33033	8.95213	8.82469	4.22218	2.24843	2.99229	0.12836	1.97257	3.17968	3.2501	5.55194	4.25323	8.53748	7.05049	5.35366	4.19097	12.9907	3.30648	FALSE	FALSE	FALSE	FALSE
MMETSP0851-20130426|3250_1	0.412872	35.5699	41.793	41.4702	44.1318	20.7703	51.0629	37.729	23.6708	22.8599	11.6886	19.4777	29.1383	18.7525	44.6527	29.7485	11.6971	35.4273	15.8901	37.6032	25.0722	23.9428	17.0129	18.1983	45.8282	35.2106	19.325	22.9343	21.7532	cAMP-dependent protein kinase regulatory subunit	ko:K04739	cNMP_binding	Name=Pfam:cNMP_binding; Dbxref=Pfam:PF00027.24; Description=cyclic nucleotide-binding domain; Ontology_term=InterPro:IPR000595; score=148.50; evalue=3.30e-44;
MMETSP0851-20130426|26785_1	0.412872	2.71417	1.64972	6.57263	1.20909	4.52686	2.93887	0.841539	3.42819	0.173181	1.20917	5.23595	1.57979	2.75771	0.767668	0.864781	0	0	0.438348	0.414741	2.63103	1.73498	0.315054	2.24671	3.25407	1.02955	3.14323	1.76417	3.13246	FALSE	FALSE	FALSE	FALSE
MMETSP0851-20130426|97774_1	0.413053	1.71421	7.56123	7.98105	7.70794	5.32572	1.83679	7.29334	6.69313	1.21227	8.86725	1.04719	5.44149	2.20617	2.81478	5.88051	13.8733	1.41196	3.50678	2.62669	3.40486	16.6558	18.2732	5.16742	6.77932	4.1182	4.77305	7.69821	3.65454	Secreted and surface protein containing fasciclin-like repeats	-	Fasciclin	Name=Pfam:Fasciclin; Dbxref=Pfam:PF02469.17; Description=fasciclin domain; Ontology_term=InterPro:IPR000782; score=79.60; evalue=1.70e-22;
MMETSP0851-20130426|191173_1	0.413053	11.8566	16.0848	16.4316	6.95226	14.5126	10.531	19.6359	5.71365	14.374	15.9207	8.16808	4.9149	22.0617	9.33997	17.8145	7.07268	1.54032	3.72596	7.0506	15.6314	10.7569	9.92421	16.401	18.4397	22.2383	9.77894	12.8304	9.04933	FALSE	FALSE	FALSE	FALSE
MMETSP0851-20130426|6104_1	0.413053	25.5704	32.7195	33.4891	29.3204	54.3224	48.2465	30.4357	31.5067	40.6975	214.628	33.3006	28.7872	47.9842	25.9728	37.8774	28.8348	52.1141	35.0678	49.9072	21.9768	29.1477	38.4366	24.7138	37.4218	42.0056	23.1668	34.3212	40.5479	FALSE	FALSE	FALSE	FALSE
MMETSP0851-20130426|190012_1	0.413053	38.9984	45.2299	52.268	42.167	33.8183	37.7155	35.2044	37.8733	38.0998	31.0354	27.8553	41.9521	28.4964	26.4846	42.0284	45.4284	47.7498	40.1088	48.9395	40.3941	39.5576	20.1635	44.9341	37.693	42.4174	40.9784	27.2645	28.7142	FALSE	FALSE	FALSE	Name=Pfam:MMPL; Dbxref=Pfam:PF03176.10; Description=mmpl family; Ontology_term=InterPro:IPR004869; score=133.00; evalue=8.80e-39;
MMETSP0851-20130426|61694_1	0.413094	5.42834	11.5481	10.9544	6.49886	7.32287	4.53076	6.4518	11.1008	9.17859	9.27031	7.12089	6.67021	1.65463	8.18846	5.70756	1.90418	5.26275	1.86298	8.84781	3.40486	5.55194	1.7328	6.51545	15.9992	6.58912	3.84173	2.72645	2.08831	FALSE	FALSE	FALSE	Name=Pfam:cNMP_binding; Dbxref=Pfam:PF00027.24; Description=cyclic nucleotide-binding domain; Ontology_term=InterPro:IPR000595; score=40.30; evalue=1.80e-10;
MMETSP0851-20130426|159931_1	0.413832	15.9993	15.3974	13.3017	16.7761	8.38801	10.4085	10.94	6.85638	3.80998	18.7421	8.37752	5.61702	21.1425	9.85174	9.51259	3.53634	6.80307	12.8217	9.4008	30.0247	8.50142	37.9641	11.4582	6.77932	16.061	27.3577	13.6323	17.4026	FALSE	FALSE	FALSE	Name=Pfam:adh_short; Dbxref=Pfam:PF00106.20; Description=short chain dehydrogenase; Ontology_term=InterPro:IPR002198; score=67.80; evalue=9.00e-19;
MMETSP0851-20130426|99498_1	0.414181	2.85702	1.92468	0.156491	1.96477	1.864	0.244906	1.26231	3.1017	0	8.06114	0	1.22872	2.39002	7.42079	6.39938	3.53634	15.7883	0.109587	19.0781	0.773833	2.25548	6.77367	1.57269	0.271173	2.26501	0.465664	7.21708	1.91428	FALSE	FALSE	FALSE	FALSE
MMETSP0851-20130426|104950_1	0.414181	46.8552	34.6442	38.8098	39.5977	25.9629	47.5118	31.137	33.1392	27.1894	30.0277	12.3568	33.8777	19.8555	24.4374	34.9372	65.2863	8.72847	9.75324	16.4514	11.4527	58.8159	117.673	22.4671	44.7435	28.8274	17.2296	24.2173	18.2727	FALSE	FALSE	FALSE	Name=Pfam:PAN_4; Dbxref=Pfam:PF14295.1; Description=pan domain; score=29.10; evalue=5.30e-07;
MMETSP0851-20130426|90773_1	0.415768	16.9993	20.8965	18.466	10.2773	17.1755	9.42888	14.4464	13.223	24.0722	25.191	5.02651	19.6596	21.1425	52.5853	52.5787	143.63	164.686	147.504	65.2526	83.7287	17.5233	17.328	13.2556	20.8803	15.6492	83.8195	25.34	55.8622	Glyceraldehyde 3-phosphate dehydrogenase, NAD binding domain	ko:K00134	Gp_dh_C,Gp_dh_N	Name=Pfam:Gp_dh_C; Dbxref=Pfam:PF02800.15; Description=glyceraldehyde 3-phosphate dehydrogenase c-terminal domain; Ontology_term=InterPro:IPR020829; score=193.00; evalue=1.80e-57;
MMETSP0851-20130426|156565_1	0.415768	6.1426	12.7854	2.03439	9.37044	4.92629	7.83699	8.27514	6.20339	9.87132	8.86725	6.91145	4.21277	4.78004	4.73395	7.61007	5.1685	27.3406	37.15	3.87092	5.10729	11.7979	0.315054	1.79737	15.728	11.325	2.2119	5.93404	4.69869	Potassium channel	ko:K05389	Ion_trans_2	Name=Pfam:Ion_trans_2; Dbxref=Pfam:PF07885.11; Description=ion channel; Ontology_term=InterPro:IPR013099; score=75.30; evalue=2.00e-21;
MMETSP0851-20130426|142336_1	0.415768	19.1421	17.3221	27.073	20.1011	15.9772	24.0008	15.849	11.917	7.2736	31.4384	12.5663	15.2713	14.524	12.2827	10.7233	5.98458	2.69556	1.75339	5.94463	10.9884	12.6654	8.97905	8.53748	3.25407	18.5319	7.10137	14.7549	9.39738	pyrimidine nucleotide-sugar transmembrane transporter activity	ko:K15272	Nuc_sug_transp	Name=Pfam:Nuc_sug_transp; Dbxref=Pfam:PF04142.10; Description=nucleotide-sugar transporter; Ontology_term=InterPro:IPR007271; score=251.20; evalue=6.60e-75;
MMETSP0851-20130426|4742_1	0.415768	16.7136	15.9473	15.3361	10.1261	13.1812	12.98	10.94	7.83586	6.92724	40.3057	1.6755	10.0053	17.4655	12.4106	16.2579	19.5859	16.4301	60.0537	9.81554	44.5728	26.1982	53.0867	9.43617	11.3893	14.4137	73.2256	18.4436	26.7999	SnoaL-like domain	-	CaMKII_AD,DUF4440	Name=Pfam:CaMKII_AD; Dbxref=Pfam:PF08332.5; Description=calcium/calmodulin dependent protein kinase ii association; Ontology_term=InterPro:IPR013543; score=85.90; evalue=1.80e-24;
MMETSP0851-20130426|167478_1	0.415768	1.28566	0.962339	4.53824	0.906817	3.19543	3.55114	5.61026	1.63247	7.2736	3.42598	0.209438	3.33511	2.39002	0.895613	0.691825	0	0	2.30133	1.24422	0.4643	3.29647	5.67098	7.86347	0	3.29456	2.2119	30.6325	0.348051	FALSE	FALSE	FALSE	FALSE
MMETSP0851-20130426|73274_1	0.415768	0.714256	2.06215	2.34737	3.02272	4.79315	5.75529	3.50641	5.22391	3.29044	0.604585	10.8908	4.73936	2.20617	1.40739	1.90252	1.63216	5.13439	0	2.3502	0.619066	2.25548	1.26022	8.31281	11.9316	5.97139	1.86265	1.44342	1.04415	FALSE	FALSE	FALSE	FALSE
MMETSP0851-20130426|144801_1	0.415768	25.9989	25.5707	23.4737	29.925	24.7646	23.7559	36.1862	26.446	14.0277	22.1681	38.1177	31.2447	45.5942	18.2961	15.3931	17.6817	39.1497	8.32861	12.304	13.929	23.0753	11.9721	15.5023	10.3046	22.2383	13.6207	15.3964	14.7922	FALSE	FALSE	FALSE	Name=Pfam:PAN_1; Dbxref=Pfam:PF00024.21; Description=pan domain; Ontology_term=InterPro:IPR003014; score=27.30; evalue=1.90e-06;
MMETSP0851-20130426|184166_1	0.415768	21.2848	16.0848	21.2828	16.4738	20.1046	13.4698	21.1787	15.3452	12.469	6.85197	20.3155	15.2713	15.4432	10.6194	15.5661	26.3865	1.54032	2.95885	7.60359	6.65496	15.9618	12.2871	15.5023	4.88111	16.061	10.2446	8.33973	12.7039	FALSE	FALSE	FALSE	FALSE
MMETSP0851-20130426|35990_1	0.415768	21.2848	8.38609	28.0119	14.0557	3.99429	34.6542	12.9036	10.2846	5.19543	8.66572	17.8022	10.7074	0.367695	7.03696	5.88051	4.62444	11.8091	2.19174	6.63586	2.63103	2.42898	1.41774	4.04407	8.67753	2.26501	1.28058	3.04721	7.4831	FALSE	FALSE	FALSE	FALSE
MMETSP0851-20130426|193040_1	0.415768	11.5709	13.0603	9.07649	13.6023	8.38801	13.2249	12.2023	6.36664	5.71497	4.43362	10.2625	6.67021	23.3486	8.31641	7.26416	12.2412	2.05376	0.657522	3.17968	5.41683	6.59293	5.82851	9.43617	3.25407	9.26595	9.89535	10.7454	3.48051	FALSE	FALSE	FALSE	FALSE
MMETSP0851-20130426|142946_1	0.416999	57.8547	43.5802	38.4968	48.9681	42.2063	66.1246	59.4688	50.4434	59.5743	38.895	61.3653	46.6915	45.7781	63.0768	41.8554	42.4361	51.729	13.9175	57.5108	34.9772	50.835	28.67	45.6081	45.0147	51.6834	23.3996	44.7459	35.8493	Rtf2 RING-finger	ko:K10598	Pro_isomerase,Rtf2	Name=Pfam:Pro_isomerase; Dbxref=Pfam:PF00160.16; Description=cyclophilin type peptidyl-prolyl cis-trans isomerase/cld; Ontology_term=InterPro:IPR002130; score=151.90; evalue=1.40e-44;
MMETSP0851-20130426|51908_1	0.416999	4.57124	11.823	10.9544	7.1034	4.79315	5.38793	6.4518	10.2846	17.3181	3.82904	2.51326	9.12766	1.83848	7.03696	4.49686	5.98458	0.641799	1.97257	3.45618	8.51216	6.24594	4.41076	5.16742	4.33876	6.1773	4.77305	6.89632	9.91945	FALSE	FALSE	FALSE	FALSE
MMETSP0851-20130426|118761_1	0.416999	2.99987	3.16197	1.56491	2.56931	2.26343	3.06132	3.2259	5.06066	2.07817	5.23974	0.837752	3.68617	11.2147	13.1783	17.1227	68.2786	0.25672	0.328761	0.138247	1.23813	1.21449	2.20538	3.37006	0.542345	5.76548	1.74624	1.60379	1.04415	FALSE	FALSE	FALSE	FALSE
MMETSP0851-20130426|12813_1	0.416999	5.14264	7.42375	5.16421	9.06817	3.59486	4.89812	2.66487	4.89741	10.564	2.21681	1.46607	5.26596	4.96389	3.7104	3.28617	13.6013	22.7197	9.09572	1.93546	5.41683	9.02191	0.315054	3.8194	15.1857	6.58912	1.97907	5.61328	2.08831	FALSE	FALSE	FALSE	FALSE
MMETSP0851-20130426|76976_1	0.418725	40.8554	35.0566	27.386	35.3659	25.164	31.8378	38.7108	30.364	26.8431	20.3544	21.5721	39.8458	31.0702	20.2153	37.1856	23.6663	8.60011	30.5748	16.1749	24.2983	31.4032	19.8484	33.4759	61.5562	46.5356	27.5906	26.9438	22.2753	FALSE	FALSE	FALSE	FALSE
MMETSP0851-20130426|1546_1	0.418725	9.71388	13.6102	11.4239	11.3352	11.0509	8.57171	8.83616	14.0393	19.9158	0	17.5928	14.9202	9.37623	9.33997	11.0692	4.08039	13.9912	2.5205	9.6773	7.11926	7.63392	3.4656	20.6697	20.338	26.1506	8.38195	11.5473	3.82856	FALSE	FALSE	FALSE	FALSE
MMETSP0851-20130426|182867_1	0.41892	8.99962	7.1488	7.51158	6.80113	4.52686	3.67359	5.89078	7.34612	1.03909	9.87489	1.04719	8.60107	3.4931	5.75751	5.88051	6.2566	15.7883	35.7254	10.5068	5.72636	5.20495	2.83549	3.8194	13.2875	2.88274	6.40288	6.09442	3.30648	TPR repeat	ko:K17768	TPR_1,TPR_16,TPR_2,TPR_8	Name=Pfam:TPR_11; Dbxref=Pfam:PF13414.1; Description=tpr repeat; score=51.40; evalue=5.50e-14;
MMETSP0851-20130426|33017_1	0.41892	28.9988	21.7214	36.306	24.3329	7.18972	16.4087	7.15308	15.0187	10.2177	0.201528	17.1739	8.7766	5.14773	7.93257	9.68555	1.36013	16.9435	0.767109	26.2669	2.47626	9.19541	3.62313	4.71808	28.202	28.6215	11.0595	19.2455	3.13246	FALSE	FALSE	FALSE	FALSE
MMETSP0851-20130426|189181_1	0.41892	14.5708	15.2599	17.6835	22.8216	19.7052	25.96	27.4903	15.5085	8.65905	57.6371	9.84359	11.234	13.237	26.9963	83.8838	22.0341	21.9495	88.6559	118.34	15.4767	22.7283	22.6839	17.749	8.67753	18.1201	18.1609	74.7368	18.6207	FALSE	FALSE	FALSE	FALSE
MMETSP0851-20130426|67691_1	0.41951	7.99967	9.07348	9.85894	17.9852	11.5834	7.83699	11.501	7.01963	4.50271	21.1605	9.42471	4.73936	15.0755	12.0268	11.761	16.3216	6.41799	33.0953	8.43307	25.6912	11.4509	12.6022	12.3569	3.25407	8.85413	31.1995	16.6795	24.0155	Belongs to the CDS family	ko:K00981	CTP_transf_1	Name=Pfam:CTP_transf_1; Dbxref=Pfam:PF01148.15; Description=cytidylyltransferase family; Ontology_term=InterPro:IPR000374; score=114.40; evalue=6.00e-33;
MMETSP0851-20130426|192725_1	0.41951	38.427	30.5199	33.9586	44.8874	32.2206	46.777	30.9967	37.3836	25.4576	12.0917	42.3065	35.4575	37.6888	25.8448	24.7327	19.5859	7.95831	11.1779	23.0873	24.9174	56.5604	31.0329	34.8239	38.5065	29.4451	19.9071	29.0287	28.3662	FALSE	FALSE	FALSE	Name=Pfam:p25-alpha; Dbxref=Pfam:PF05517.7; Description=p25-alpha; Ontology_term=InterPro:IPR008907; score=158.70; evalue=1.10e-46;
MMETSP0851-20130426|59178_1	0.420357	8.71392	19.9342	17.9965	13.7534	7.05658	8.69416	10.6595	12.57	12.8154	5.03821	5.44539	7.54787	26.6579	14.3298	10.7233	15.7775	17.5853	21.6982	26.2669	16.2505	17.0028	12.4446	17.5243	14.3722	15.2373	11.9908	11.7077	9.74543	-	-	-	FALSE
MMETSP0851-20130426|169286_1	0.420357	30.2845	36.019	23.7867	15.567	27.2943	21.3068	18.0931	23.9973	20.089	11.8902	31.4157	30.7181	10.2955	41.0703	12.9717	0.272026	3.46571	6.46563	9.81554	11.6075	47.712	7.56131	12.3569	35.5236	21.2087	13.3878	27.4249	12.8779	Chlorophyll A-B binding protein	ko:K08908	Chloroa_b-bind	Name=Pfam:Chloroa_b-bind; Dbxref=Pfam:PF00504.16; Description=chlorophyll a-b binding protein; Ontology_term=InterPro:IPR022796; score=90.50; evalue=1.10e-25;
MMETSP0851-20130426|193708_1	0.420357	17.5707	14.8475	12.9888	21.1591	11.9829	12.8576	17.9528	11.917	12.6422	8.46419	8.16808	18.6064	17.2817	12.0268	22.3114	14.6894	8.72847	10.082	43.2713	12.0718	17.3498	12.2871	14.1542	10.8469	9.06004	11.9908	10.9058	9.91945	DnaJ molecular chaperone homology domain	-	DnaJ	Name=Pfam:DnaJ; Dbxref=Pfam:PF00226.26; Description=dnaj domain; Ontology_term=InterPro:IPR001623; score=44.60; evalue=8.00e-12;
MMETSP0851-20130426|194448_1	0.420357	41.9982	36.4314	33.8021	42.167	32.62	30.2459	27.9111	25.3033	15.0667	33.6552	14.6607	35.9841	32.3572	34.673	42.5472	37.5396	17.2002	22.9037	26.5434	45.9657	29.3212	55.1345	30.3305	50.4381	31.0924	72.76	35.1231	65.2596	Glycoside hydrolase, family 20, catalytic core	ko:K12373	Glyco_hydro_20,Glyco_hydro_20b	Name=Pfam:Glyco_hydro_20; Dbxref=Pfam:PF00728.17; Description=glycosyl hydrolase family 20 catalytic domain; Ontology_term=InterPro:IPR015883; score=323.00; evalue=2.10e-96;
MMETSP0851-20130426|116381_1	0.420357	24.4276	28.3203	29.1074	26.7511	35.8155	25.4702	24.2644	20.7324	29.2676	48.1653	26.3892	48.0958	31.8056	39.0231	41.6824	49.5088	62.2545	164.161	84.1925	42.0965	38.6901	41.2721	20.2204	14.3722	33.7692	44.3545	49.0761	61.605	phosphorelay sensor kinase activity	-	HATPase_c,HisKA,PAS,Response_reg,Trans_reg_C	Name=Pfam:HATPase_c; Dbxref=Pfam:PF02518.21; Description=histidine kinase- dna gyrase b- and hsp90-like atpase; Ontology_term=InterPro:IPR003594; score=61.60; evalue=4.40e-17;
MMETSP0851-20130426|99160_1	0.420357	12.2852	20.0716	9.38947	15.7182	28.7589	13.7147	23.4228	27.2623	8.13951	23.7804	10.4719	23.5213	19.6717	24.0536	40.8177	32.9152	72.0098	38.465	32.2116	26.3103	17.3498	42.0598	9.66084	16.5415	13.1782	21.6534	13.7926	24.0155	WD domain, G-beta repeat	ko:K04536	WD40	Name=Pfam:WD40; Dbxref=Pfam:PF00400.27; Description=wd domain g-beta repeat; Ontology_term=InterPro:IPR001680; score=135.00; evalue=2.10e-40;
MMETSP0851-20130426|135541_1	0.420357	2.57132	2.33711	5.47719	2.41818	12.3823	4.1634	1.96359	8.97859	13.8545	0.403057	2.09438	16.6755	2.75771	4.60601	1.55661	2.72026	0.513439	3.83554	0.829483	1.23813	2.77597	3.4656	5.84144	14.101	13.3841	3.49248	5.93404	3.82856	FALSE	FALSE	FALSE	FALSE
MMETSP0851-20130426|20420_1	0.420357	25.4275	13.0603	17.0575	12.5443	9.18687	14.5719	9.53745	9.46833	12.2958	8.46419	2.09438	6.14362	3.67695	8.31641	5.88051	5.71255	1.54032	1.6438	2.76494	3.86916	9.19541	5.1984	8.76215	4.33876	8.03049	6.75212	6.09442	5.74284	FALSE	FALSE	FALSE	Name=Pfam:PsbY; Dbxref=Pfam:PF06298.6; Description=photosystem ii protein y (psby); Ontology_term=InterPro:IPR009388; score=28.90; evalue=5.20e-07;
MMETSP0851-20130426|188911_1	0.420357	42.7125	24.0585	30.5158	29.6227	66.5715	57.7978	36.607	59.422	35.5021	5.03821	23.8759	32.6489	44.3073	42.6056	34.0724	4.08039	65.3351	12.1642	61.6582	66.0853	17.1763	24.7318	19.9957	42.8453	16.4728	21.0713	13.6323	19.3168	FALSE	FALSE	FALSE	FALSE
MMETSP0851-20130426|150923_1	0.420357	5.42834	3.16197	0.782456	1.6625	0.932001	2.57151	3.2259	79.8278	0	2.61987	4.18876	3.33511	2.94156	5.37368	28.5378	498.896	0.898519	2.30133	1.52072	0.773833	94.0361	95.4615	1.79737	62.0985	2.0591	1.04774	0.641518	2.95843	FALSE	FALSE	FALSE	FALSE
MMETSP0851-20130426|74470_1	0.420357	39.4269	53.4785	48.8252	44.2829	62.5772	46.0423	46.4249	56.3203	41.9098	34.6629	157.497	62.6649	45.9619	41.3261	43.585	27.7467	67.9023	79.1218	35.253	31.4176	36.2611	20.4785	50.1016	30.3713	73.3039	23.7488	51.6422	25.0597	FALSE	FALSE	FALSE	Name=Pfam:RRM_6; Dbxref=Pfam:PF14259.1; Description=rna recognition motif (a.k.a. rrm rbd or rnp domain); score=49.70; evalue=2.40e-13;
MMETSP0851-20130426|163109_1	0.422562	1.85707	6.18646	9.23298	6.80113	8.12172	4.77567	5.47001	3.26494	3.46362	6.24738	1.04719	5.09043	12.6855	3.07067	9.8585	1.63216	10.5255	3.17802	12.7187	4.79776	5.37845	3.30807	4.26874	13.0163	4.1182	3.60889	6.41518	1.74026	short chain dehydrogenase	ko:K00072	adh_short	FALSE
MMETSP0851-20130426|138459_1	0.422562	1.28566	2.61206	2.50386	0.604545	1.06514	5.51038	2.94539	26.6093	0	1.00764	0.209438	0.702128	7.53775	3.96629	6.74529	61.4779	0.513439	1.20546	0.691235	2.3215	23.4223	27.5673	2.24671	0.542345	2.47092	2.44473	0.962277	1.3922	FALSE	FALSE	FALSE	FALSE
MMETSP0851-20130426|129339_1	0.422562	6.85686	10.4482	7.82456	9.21931	8.38801	7.22473	5.47001	8.3256	2.42453	30.6323	3.14157	4.21277	12.3178	7.67668	8.12894	11.9692	3.59407	11.7258	6.22112	10.6789	10.7569	14.4925	6.06611	4.60994	7.41276	12.3401	9.14163	10.0935	FALSE	FALSE	FALSE	FALSE
MMETSP0851-20130426|54354_1	0.424931	17.4278	27.4954	25.9775	30.8318	60.1806	23.2661	19.9164	22.3649	5.02225	121.522	58.0143	25.2766	27.9448	65.1239	89.4184	248.632	150.053	823.985	116.404	470.026	565.257	334.273	44.7095	38.2353	18.5319	1198.5	113.388	302.282	Belongs to the citrate synthase family	ko:K01647	Citrate_synt	Name=Pfam:Citrate_synt; Dbxref=Pfam:PF00285.16; Description=citrate synthase; Ontology_term=InterPro:IPR002020; score=353.40; evalue=8.80e-106;
MMETSP0851-20130426|64070_1	0.42507	1.28566	4.81169	2.97333	1.81363	2.92915	1.95925	3.50641	3.1017	0	1.4107	7.33033	4.21277	5.14773	1.53534	2.94026	2.17621	0	1.53422	0.276494	2.01196	2.08198	1.7328	2.24671	17.3551	4.1182	0.349248	3.36797	1.91428	FALSE	FALSE	FALSE	FALSE
MMETSP0851-20130426|190293_1	0.425097	31.713	39.1809	28.7944	36.7261	33.9515	28.1642	31.9785	33.9554	20.2622	39.9026	16.5456	27.0319	68.759	26.3566	49.1196	25.0264	11.0389	19.1777	23.3638	31.7271	34.1792	29.7726	27.1851	14.9145	28.0037	29.8025	38.1703	27.6701	FALSE	FALSE	FALSE	FALSE
MMETSP0851-20130426|153580_1	0.425232	3.57128	5.49908	5.47719	3.47613	4.66001	3.67359	4.48821	2.44871	3.11726	1.20917	5.86426	0.526596	4.59619	6.90902	2.7673	31.8271	5.90455	18.9586	46.7275	4.95253	10.2364	11.342	7.18946	0.271173	5.35366	3.72531	3.04721	5.39479	FALSE	FALSE	FALSE	FALSE
MMETSP0851-20130426|11718_1	0.425507	31.5701	43.0303	31.2982	44.2829	29.4246	27.7968	44.8821	33.4657	47.798	107.213	74.3505	45.1117	26.6579	150.207	212.909	61.4779	82.0219	270.57	264.467	38.5369	135.676	72.7776	50.5509	29.829	33.7692	41.7933	144.662	87.1868	ABC transporter transmembrane region	ko:K05657	ABC_membrane,ABC_tran	Name=Pfam:ABC_membrane; Dbxref=Pfam:PF00664.18; Description=abc transporter transmembrane region; Ontology_term=InterPro:IPR001140; score=113.20; evalue=1.30e-32;
MMETSP0851-20130426|55077_1	0.426488	9.42818	11.823	5.16421	5.4409	13.048	11.8779	8.27514	10.7743	4.67589	10.2779	8.37752	6.14362	10.6632	5.75751	6.57234	6.2566	6.67471	14.0271	5.25339	17.3338	11.1039	22.999	4.94275	5.42345	8.85413	16.2982	11.8681	15.6623	NUDIX domain	-	NUDIX	Name=Pfam:NUDIX; Dbxref=Pfam:PF00293.23; Description=nudix domain; Ontology_term=InterPro:IPR000086; score=34.60; evalue=1.10e-08;
MMETSP0851-20130426|139680_1	0.426488	3.42843	7.69871	2.97333	2.26704	4.12743	3.06132	4.62847	7.34612	7.2736	7.85961	5.86426	10.3564	5.69928	4.60601	7.61007	2.99229	0.385079	0.328761	2.07371	2.16673	7.80742	13.3898	3.37006	7.86401	3.91229	3.14323	3.04721	1.21818	FALSE	FALSE	FALSE	FALSE
MMETSP0851-20130426|132338_1	0.42668	5.28549	3.16197	3.12982	3.62727	14.912	2.93887	6.03103	2.93845	1.03909	3.42598	2.93213	5.61702	5.88312	4.35012	15.2201	9.24889	84.9742	186.627	30.1379	6.34543	71.6548	15.4377	3.14539	3.79642	6.1773	6.40288	8.82087	3.65454	-	-	-	FALSE
MMETSP0851-20130426|194493_1	0.42668	31.9987	41.3806	30.9853	38.5397	52.7246	41.2667	48.108	41.628	24.9381	72.9533	26.5986	32.2979	35.6664	24.9492	31.9969	37.8116	48.0066	24.5475	89.9989	40.3941	43.7216	32.4506	37.2953	21.1515	52.3011	63.2138	48.2742	40.0259	FALSE	FALSE	FALSE	FALSE
MMETSP0851-20130426|124239_1	0.42668	26.5703	28.1828	20.9698	30.6806	24.232	26.6947	30.9967	34.6084	24.2453	20.959	18.8494	9.12766	39.8949	19.9594	29.2296	175.457	7.82995	6.35605	16.5897	9.90506	67.4908	129.172	32.3526	36.8795	22.2383	9.42969	27.4249	15.1402	FALSE	FALSE	FALSE	FALSE
MMETSP0851-20130426|153213_1	0.42668	26.1418	26.9455	19.8744	28.2625	20.7703	27.5519	27.4903	14.2025	25.1112	12.2932	13.8229	20.3617	19.4878	19.0638	18.1604	16.8656	6.93143	7.23274	10.3685	22.1316	30.5357	8.03389	22.9164	13.0163	19.3555	20.3728	16.3587	20.187	FALSE	FALSE	FALSE	Name=Pfam:Paf1; Dbxref=Pfam:PF03985.8; Description=paf1; Ontology_term=InterPro:IPR007133; score=59.60; evalue=2.00e-16;
MMETSP0851-20130426|13527_1	0.42668	15.2851	15.9473	18.7789	18.2875	20.6372	11.0208	17.2516	19.7529	13.1618	10.681	12.9852	16.5	6.43467	22.3903	23.868	17.9537	15.7883	15.123	12.4422	8.66692	13.1859	6.9312	19.097	24.6767	22.6501	5.47155	10.1039	9.91945	FALSE	FALSE	FALSE	FALSE
MMETSP0851-20130426|148855_1	0.42668	2.42847	2.88702	2.97333	3.02272	0.932001	1.10208	3.36616	4.57092	1.73181	4.43362	4.3982	4.21277	2.20617	1.53534	0.518869	0	2.69556	0.876696	4.42391	1.08337	2.08198	1.26022	3.14539	0.542345	3.08865	0.931327	0.320759	0	FALSE	FALSE	FALSE	Name=Pfam:HEAT_2; Dbxref=Pfam:PF13646.1; Description=heat repeats; score=34.70; evalue=1.40e-08;
MMETSP0851-20130426|181069_1	0.42926	24.2847	26.9455	22.2217	33.5522	37.5463	31.8378	33.5213	24.6503	27.0162	36.4766	15.289	24.2234	20.9586	23.158	21.4466	61.7499	13.0927	12.4929	18.2486	28.477	47.018	36.8614	23.8151	24.1344	31.916	23.1668	21.1701	29.7584	FALSE	FALSE	FALSE	FALSE
MMETSP0851-20130426|3377_1	0.431072	2.99987	3.71188	0.625965	2.72045	2.13029	1.83679	2.52462	10.9376	0	4.63515	0	4.3883	0	3.83834	11.934	10.881	37.096	4.16431	7.18885	4.48823	7.28693	5.04087	0.449341	9.21987	4.1182	4.30739	4.33025	5.22077	FALSE	FALSE	FALSE	FALSE
MMETSP0851-20130426|6474_1	0.431072	3.28558	2.88702	5.63368	1.96477	3.46172	6.2451	0.561026	3.75468	5.71497	1.4107	0.209438	2.10638	4.2285	2.30301	0	0	0	0.657522	0.552988	2.63103	2.42898	3.15054	4.71808	31.7272	1.85319	1.74624	4.97176	1.21818	sphingolipid metabolic process	ko:K20238	CMAS	Name=Pfam:CMAS; Dbxref=Pfam:PF02353.15; Description=mycolic acid cyclopropane synthetase; Ontology_term=InterPro:IPR003333; score=31.40; evalue=8.70e-08;
MMETSP0851-20130426|75442_1	0.431072	5.71405	8.936	6.72912	6.49886	6.92344	6.61246	8.69591	6.04014	9.35177	20.959	6.91145	7.72341	4.59619	8.06052	17.4686	19.0418	7.18815	12.2737	58.0638	10.3694	10.7569	8.97905	6.06611	5.15228	6.38321	3.02681	29.991	3.82856	FALSE	FALSE	FALSE	FALSE
MMETSP0851-20130426|6463_1	0.431072	3.14273	2.33711	2.97333	4.83636	1.33143	2.57151	0.701283	2.44871	9.17859	1.00764	0	0.702128	1.47078	1.02356	3.80504	1.36013	0	0.767109	0.276494	0.928599	2.94947	3.30807	3.14539	7.86401	0.41182	0.814911	3.36797	0.174026	FALSE	FALSE	FALSE	Name=Pfam:RRM_1; Dbxref=Pfam:PF00076.17; Description=rna recognition motif. (a.k.a. rrm rbd or rnp domain); Ontology_term=InterPro:IPR000504; score=40.30; evalue=1.60e-10;
MMETSP0851-20130426|170457_1	0.431072	30.2845	37.5312	28.1684	30.0761	53.7898	44.0831	30.4357	42.4443	30.653	47.9638	17.1739	26.1543	28.8641	19.4476	22.4843	25.0264	35.5557	73.0945	23.7785	19.5006	22.5548	16.3828	26.5111	19.2533	32.3279	15.1341	28.8683	13.4	FALSE	FALSE	FALSE	FALSE
MMETSP0851-20130426|1583_1	0.432219	71.5684	75.0624	69.1691	76.4749	77.7555	79.5944	79.6657	66.6048	33.5971	3.42598	80.2147	64.7713	49.6389	58.8546	75.063	6.80065	77.1442	30.4652	71.1973	22.9054	77.7272	18.5882	57.5157	35.2524	46.3297	26.0772	20.3682	73.2647	FALSE	FALSE	FALSE	FALSE
MMETSP0851-20130426|2708_1	0.433402	99.2816	91.0097	449.286	115.619	403.29	100.044	224.27	465.744	307.569	530.423	151.424	394.596	594.563	47.2116	250.441	388.453	598.542	140.162	65.8056	57.1088	27.2392	85.3797	51.2249	211.786	41.5938	61.7004	160.219	66.3037	-	-	-	FALSE
MMETSP0851-20130426|194480_1	0.433402	14.9994	16.2223	10.7979	14.6602	19.9715	15.4291	14.1659	31.5067	12.2958	10.2779	14.0323	24.5745	12.1339	13.6901	11.761	6.2566	6.67471	2.5205	5.94463	8.97646	22.5548	4.41076	56.617	27.1173	13.796	10.5938	130.87	12.5298	FALSE	FALSE	FALSE	FALSE
MMETSP0851-20130426|61458_1	0.433416	5.42834	15.6724	11.4239	5.59204	5.45886	9.30643	10.7998	11.2641	10.0445	11.2856	7.74921	10.7074	8.82469	9.46791	9.51259	17.4097	24.26	14.9038	17.8339	8.20263	8.84841	16.5404	5.3921	8.13518	13.5901	9.54611	11.3869	9.5714	Serine aminopeptidase, S33	-	Hydrolase_4	Name=Pfam:Abhydrolase_6; Dbxref=Pfam:PF12697.2; Description=alpha/beta hydrolase family; score=50.40; evalue=2.30e-13;
MMETSP0851-20130426|30039_1	0.434008	6.57115	6.32394	5.94666	5.28977	7.58915	3.06132	3.92718	9.30509	7.61996	0	4.81707	3.8617	6.25082	4.35012	5.36164	2.99229	0.25672	1.86298	1.79721	2.01196	5.37845	10.5543	2.92072	12.2028	4.1182	2.09549	2.88683	1.91428	FALSE	FALSE	FALSE	FALSE
MMETSP0851-20130426|185533_1	0.434008	3.42843	5.77403	4.38175	3.92954	2.52972	3.06132	4.90898	3.26494	12.9886	5.64279	5.65483	2.28192	9.74392	2.17506	3.63208	6.52863	7.31651	11.8354	4.14741	3.7144	1.56148	1.10269	3.59473	12.2028	9.06004	1.86265	2.56607	2.43636	FALSE	FALSE	FALSE	FALSE
MMETSP0851-20130426|3520_1	0.434948	18.4278	22.5462	16.5881	13.7534	11.3172	13.2249	13.3244	10.6111	5.88815	8.46419	1.88494	13.867	18.7525	18.1682	20.2359	24.4824	81.3801	54.7935	37.3267	13.1552	32.4442	18.9033	19.3217	0.271173	14.4137	18.6265	29.1891	31.3246	FALSE	FALSE	FALSE	Name=Pfam:Cytochrom_B561; Dbxref=Pfam:PF03188.11; Description=eukaryotic cytochrome b561; Ontology_term=InterPro:IPR004877; score=32.70; evalue=5.00e-08;
MMETSP0851-20130426|170107_1	0.435154	27.7131	23.3711	25.821	23.1238	29.5578	18.7353	23.1423	31.1802	37.2339	32.2445	17.5928	15.9734	19.1202	24.8213	14.7013	14.1454	3.97915	3.50678	14.2395	15.6314	19.9523	14.4925	37.52	26.0326	23.8855	20.9549	22.1324	16.8805	GDSL-like Lipase/Acylhydrolase	-	Lipase_GDSL_2	Name=Pfam:Lipase_GDSL_2; Dbxref=Pfam:PF13472.1; Description=gdsl-like lipase/acylhydrolase family; score=61.60; evalue=9.00e-17;
MMETSP0851-20130426|50681_1	0.435154	5.8569	6.32394	7.19859	8.16135	11.184	5.63284	1.68308	13.3863	7.96633	4.83668	2.72269	4.73936	9.00853	13.5621	11.934	1.90418	34.5288	22.7941	22.1195	11.7623	10.5834	17.0129	6.96479	6.23697	9.47186	10.5938	21.3305	13.574	Prefoldin subunit	ko:K04798	Prefoldin_2	Name=Pfam:Prefoldin_2; Dbxref=Pfam:PF01920.15; Description=prefoldin subunit; Ontology_term=InterPro:IPR002777; score=67.40; evalue=7.20e-19;
MMETSP0851-20130426|191982_1	0.435154	25.8561	29.4201	25.3516	25.6931	27.8269	26.3274	25.667	24.6503	24.9381	17.3314	15.9173	23.3458	30.7026	26.3566	22.6573	26.9306	130.67	103.341	97.4642	71.0378	30.7092	56.0797	23.1411	42.0318	17.9142	79.9777	46.9912	95.714	FALSE	FALSE	FALSE	FALSE
MMETSP0851-20130426|100110_1	0.435154	3.28558	5.3616	2.81684	2.72045	4.26058	4.89812	3.36616	14.8555	6.75406	1.4107	0	27.383	0.919238	3.19862	5.88051	55.2213	0	1.86298	1.93546	2.7858	12.6654	29.7726	1.79737	23.0497	12.3546	2.56115	3.04721	3.65454	FALSE	FALSE	FALSE	FALSE
MMETSP0851-20130426|155048_1	0.435154	2.85702	3.71188	8.45052	4.68522	21.436	5.26548	10.94	191.979	6.92724	318.616	16.5456	29.6649	61.4051	15.7372	57.4215	1153.93	9.11355	2.95885	15.0689	13.1552	430.276	514.169	19.771	202.295	16.4728	8.49836	20.3682	2.95843	FALSE	FALSE	FALSE	FALSE
MMETSP0851-20130426|87903_1	0.435154	2.14277	3.43692	1.40842	3.47613	5.19258	1.59189	4.48821	3.75468	0	3.62751	2.72269	1.93085	4.59619	2.55889	2.42139	0	6.67471	0.328761	3.45618	1.23813	1.56148	0.472582	5.3921	0	4.53002	2.09549	0.801897	1.21818	FALSE	FALSE	FALSE	FALSE
MMETSP0851-20130426|187841_1	0.435466	8.28537	10.8607	5.63368	14.0557	6.79029	12.3678	10.6595	17.7939	9.35177	26.6017	3.97932	4.9149	7.53775	6.26929	9.68555	11.4251	8.72847	2.30133	11.3363	4.79776	4.51096	2.52044	11.2335	0.813518	15.0314	5.58796	3.68873	3.30648	carboxylic ester hydrolase activity	ko:K20520	COesterase,DnaJ,zf-CSL	Name=Pfam:COesterase; Dbxref=Pfam:PF00135.23; Description=carboxylesterase family; Ontology_term=InterPro:IPR002018; score=185.90; evalue=1.10e-54;
MMETSP0851-20130426|158964_1	0.437177	2.28562	4.26179	3.44281	1.96477	6.92344	4.28585	3.92718	3.91793	1.73181	23.7804	11.7285	17.3777	34.1957	3.07067	4.15095	2.99229	8.85683	1.53422	10.5068	2.47626	5.89894	2.99302	6.29078	12.2028	4.73593	2.2119	0.962277	6.96102	Metallo-beta-lactamase superfamily	-	Lactamase_B	Name=Pfam:Lactamase_B; Dbxref=Pfam:PF00753.22; Description=metallo-beta-lactamase superfamily; Ontology_term=InterPro:IPR001279; score=59.90; evalue=2.20e-16;
MMETSP0851-20130426|115590_1	0.437177	1.99992	6.18646	1.25193	1.20909	1.864	0.367359	0.701283	1.79572	1.73181	5.64279	5.02651	14.0426	3.67695	0.255889	1.90252	1.36013	0	0.657522	0	0.154767	2.25548	0	2.92072	8.13518	32.5338	0.58208	0.641518	1.04415	FALSE	FALSE	FALSE	FALSE
MMETSP0851-20130426|70165_1	0.439704	9.99958	19.7967	15.0232	10.2773	8.25487	12.3678	11.501	22.2016	18.0108	17.7345	7.95864	12.8138	6.43467	9.7238	16.2579	5.1685	4.23587	9.09572	7.0506	12.0718	15.7883	17.1705	26.2865	2.44055	12.1487	12.9222	11.8681	30.2804	Cytidylyltransferase family	ko:K00981	CTP_transf_1	Name=Pfam:CTP_transf_1; Dbxref=Pfam:PF01148.15; Description=cytidylyltransferase family; Ontology_term=InterPro:IPR000374; score=183.10; evalue=6.60e-54;
MMETSP0851-20130426|166153_1	0.440999	3.14273	1.64972	0.625965	1.05795	3.86115	2.57151	1.54282	2.12221	4.67589	0.403057	0	9.47873	0.367695	3.07067	1.03774	0	2.18212	0.547935	2.3502	0.619066	1.04099	0	2.47138	2.44055	3.08865	0.116416	0.320759	0.522077	FALSE	FALSE	FALSE	FALSE
MMETSP0851-20130426|33281_1	0.441206	53.8549	44.4051	54.9284	46.5499	29.2915	42.8585	46.1444	48.9741	175.259	24.5865	41.0498	33.1755	14.7078	39.5349	26.8082	8.43281	43.514	13.1504	38.8474	17.1791	28.6272	12.7597	22.2424	74.3013	68.7739	17.1131	20.3682	23.1454	Belongs to the eukaryotic ribosomal protein eS1 family	ko:K02984	Ribosomal_S3Ae	Name=Pfam:Ribosomal_S3Ae; Dbxref=Pfam:PF01015.13; Description=ribosomal s3ae family; Ontology_term=InterPro:IPR001593; score=41.30; evalue=8.60e-11;
MMETSP0851-20130426|122695_1	0.441206	31.713	46.3297	37.5579	30.9829	43.9372	32.0827	35.2044	40.6485	35.5021	37.2828	18.8494	22.8192	27.0256	35.5686	36.6667	12.7852	26.1854	7.23274	34.4235	18.4172	29.8417	12.1296	32.8019	34.9813	38.7111	20.2564	23.8965	25.2337	Prolyl 4-hydroxylase alpha subunit homologues.	-	2OG-FeII_Oxy_3	Name=Pfam:2OG-FeII_Oxy_3; Dbxref=Pfam:PF13640.1; Description=2og-fe(ii) oxygenase superfamily; Ontology_term=InterPro:IPR005123; score=38.60; evalue=1.10e-09;
MMETSP0851-20130426|7904_1	0.442271	18.1421	26.5331	20.1874	20.2522	18.2406	14.327	16.971	12.4068	30.9994	14.9131	11.7285	21.766	40.998	31.7303	79.2139	57.6695	199.599	340.048	59.0315	80.9429	19.9523	76.0856	16.8503	39.0489	35.2106	49.2439	30.6325	84.2283	Belongs to the D-isomer specific 2-hydroxyacid dehydrogenase family	ko:K00058	2-Hacid_dh,2-Hacid_dh_C	Name=Pfam:2-Hacid_dh_C; Dbxref=Pfam:PF02826.14; Description=d-isomer specific 2-hydroxyacid dehydrogenase nad binding domain; Ontology_term=InterPro:IPR006140; score=113.90; evalue=4.00e-33;
MMETSP0851-20130426|11917_1	0.442271	14.7137	16.0848	18.466	18.2875	6.79029	14.9393	25.5267	4.24443	11.9495	20.3544	5.44539	3.15958	6.43467	7.67668	8.3019	10.881	1.41196	1.20546	1.65897	2.94056	6.76643	7.40378	19.5463	6.23697	6.58912	4.19097	5.93404	4.35064	Carrier of the growing fatty acid chain in fatty acid biosynthesis	ko:K02078	PP-binding	Name=Pfam:PP-binding; Dbxref=Pfam:PF00550.20; Description=phosphopantetheine attachment site; Ontology_term=InterPro:IPR009081; score=43.00; evalue=3.70e-11;
MMETSP0851-20130426|137789_1	0.442271	2.42847	2.88702	1.87789	2.56931	3.32858	3.30623	2.94539	1.46922	13.6813	7.65808	0	0.175532	1.28693	1.40739	3.63208	4.35242	0.898519	0.767109	0.414741	1.8572	2.77597	7.08872	2.24671	6.77932	4.1182	1.51341	6.2548	3.48051	FALSE	FALSE	FALSE	FALSE
MMETSP0851-20130426|175025_1	0.442271	7.28541	7.28628	10.3284	12.0909	9.71944	2.20415	7.15308	10.7743	0	0.403057	11.3097	4.21277	4.96389	7.1649	14.3554	16.5936	27.3406	24.2187	7.74184	7.42879	4.68445	5.51345	5.61677	3.25407	1.85319	7.68345	4.651	2.78441	FALSE	FALSE	FALSE	FALSE
MMETSP0851-20130426|152200_1	0.442271	1.71421	0.549908	3.28631	2.87159	2.92915	2.81642	5.04924	2.12221	15.2399	8.86725	8.37752	2.10638	0	1.53534	1.72956	5.44052	0	0.438348	0.552988	0.619066	1.90848	8.50647	4.26874	20.0668	2.88274	0.814911	1.60379	0.870128	FALSE	FALSE	FALSE	FALSE
MMETSP0851-20130426|173850_1	0.442271	2.99987	4.81169	1.56491	2.26704	7.05658	5.51038	5.75052	12.2435	4.67589	2.01528	1.25663	3.8617	0	5.37368	6.74529	1.0881	4.87767	0.767109	6.77411	2.3215	1.56148	2.36291	3.8194	0.813518	4.32411	1.62982	2.88683	1.91428	FALSE	FALSE	FALSE	FALSE
MMETSP0851-20130426|195471_1	0.442271	15.2851	13.6102	23.7867	16.3227	17.4417	12.7351	12.2023	8.97859	15.4131	11.4871	23.4571	6.14362	34.5634	10.1076	13.8365	7.88876	2.82392	2.73967	7.46534	8.82169	12.1449	13.8624	6.74012	8.13518	13.1782	17.2296	24.8588	7.65712	FALSE	FALSE	FALSE	FALSE
MMETSP0851-20130426|72040_1	0.442271	5.42834	4.26179	9.54596	6.04545	4.39372	2.57151	5.18949	5.06066	2.59771	5.44127	3.56045	0.175532	3.8608	12.5386	15.739	21.218	61.8694	22.9037	20.3223	18.2624	26.1982	8.97905	5.84144	4.06759	2.88274	22.3519	14.2738	24.7116	FALSE	FALSE	FALSE	FALSE
MMETSP0851-20130426|116504_1	0.446326	1.99992	1.09982	4.85123	2.87159	0.532572	1.71434	4.62847	1.14273	0	3.42598	0	0	5.51543	0.511779	0.345912	5.1685	11.5524	1.75339	0.691235	0.619066	1.38799	0.945163	1.79737	3.79642	1.23546	2.32832	1.92455	0.870128	FALSE	FALSE	FALSE	FALSE
MMETSP0851-20130426|29811_1	0.446326	2.42847	0.687385	3.44281	5.89431	2.13029	8.3268	1.96359	3.42819	0.346362	1.00764	1.6755	0.175532	3.12541	2.55889	2.24843	0	6.80307	0.876696	2.62669	0.154767	1.73498	0.945163	6.74012	0	2.0591	0.232832	0.481138	1.74026	FALSE	FALSE	FALSE	FALSE
MMETSP0851-20130426|172022_1	0.446326	1.57136	0.824862	1.7214	1.96477	2.66286	2.44906	1.82334	1.14273	0	5.03821	8.37752	3.33511	4.59619	4.09423	2.42139	0.272026	0.12836	0.109587	0.138247	1.08337	1.56148	1.89033	3.14539	5.9658	2.47092	1.74624	1.44342	1.3922	FALSE	FALSE	FALSE	FALSE
MMETSP0851-20130426|8763_1	0.446925	6.28545	6.59889	5.00772	7.40567	2.92915	6.36755	10.0985	23.9973	3.6368	1.4107	9.21527	8.60107	5.33158	11.3871	8.64781	4.35242	13.8629	2.41091	8.15658	0	4.51096	4.88334	2.47138	4.60994	4.32411	3.14323	0.962277	4.87271	FALSE	FALSE	FALSE	FALSE
MMETSP0851-20130426|187702_1	0.450943	3.57128	4.67422	3.75579	4.68522	3.728	4.40831	6.59206	5.22391	2.42453	2.8214	4.81707	4.21277	6.43467	5.24573	3.63208	9.52092	0.12836	1.6438	1.65897	2.16673	5.89894	1.26022	12.3569	0.271173	3.29456	1.97907	6.2548	8.70128	FALSE	FALSE	FALSE	FALSE
MMETSP0851-20130426|120231_1	0.450943	7.57111	8.52357	6.25965	10.1261	5.59201	6.97982	3.64667	5.5504	8.31269	5.64279	4.18876	5.61702	2.20617	2.81478	3.11321	5.71255	7.44487	0.438348	1.93546	1.70243	2.77597	1.89033	2.69605	12.2028	4.1182	1.62982	2.40569	1.91428	FALSE	FALSE	FALSE	FALSE
MMETSP0851-20130426|2928_1	0.451363	1.42851	4.94917	3.44281	2.11591	4.52686	3.18378	2.80513	3.42819	0.346362	7.25502	0.209438	6.84575	7.17006	4.47807	4.49686	6.2566	8.98519	3.61637	4.56215	2.63103	2.77597	1.26022	0.224671	3.25407	2.67683	1.74624	2.24531	1.3922	FALSE	FALSE	FALSE	FALSE
MMETSP0851-20130426|100068_1	0.451363	2.42847	3.43692	2.50386	3.92954	3.99429	4.04095	0.701283	6.20339	0	6.04585	0.628314	2.28192	4.04465	1.79123	2.42139	0.272026	0.25672	0.438348	0.414741	2.94056	3.99046	3.30807	1.79737	0	3.50047	2.9104	2.24531	1.04415	FALSE	FALSE	FALSE	Name=Pfam:ZZ; Dbxref=Pfam:PF00569.12; Description=zinc finger zz type; Ontology_term=InterPro:IPR000433; score=29.90; evalue=2.50e-07;
MMETSP0851-20130426|190483_1	0.452329	52.8549	77.537	59.3102	55.0136	52.4584	70.6554	65.2193	192.468	36.5412	11.0841	34.5573	32.1223	61.589	52.9691	87.1699	670.817	22.463	19.7257	45.0686	35.132	220.169	342.622	48.5289	62.6409	36.8579	40.1635	47.6327	43.1583	Belongs to the peptidase A1 family	ko:K01379,ko:K08245	Asp,SapB_1,SapB_2	Name=Pfam:Asp; Dbxref=Pfam:PF00026.18; Description=eukaryotic aspartyl protease; Ontology_term=InterPro:IPR001461; score=248.10; evalue=1.10e-73;
MMETSP0851-20130426|4706_1	0.452329	4.42839	6.18646	15.6491	3.92954	3.19543	3.67359	7.57385	13.3863	8.83223	5.64279	12.3568	2.10638	9.19238	4.73395	10.7233	27.2026	18.4838	2.73967	18.3869	5.41683	9.19541	6.61614	6.06611	5.15228	6.79503	5.35513	2.24531	10.9636	FALSE	FALSE	FALSE	FALSE
MMETSP0851-20130426|1293_1	0.455856	143.137	227.249	1673.05	146.904	1548.32	1119.59	1176.75	1854.16	4031.65	3184.55	847.177	2145	2793.93	580.997	960.599	2123.16	2326.78	1087.32	234.605	165.755	146.606	172.02	248.71	1643.31	250.798	277.536	556.517	254.425	-	-	-	FALSE
MMETSP0851-20130426|189535_1	0.455856	56.4262	48.9418	51.4856	51.084	52.5915	37.1033	56.6637	75.2569	42.2562	57.0325	34.7667	49.6755	45.9619	32.8818	40.1258	143.358	13.0927	16.5476	38.018	36.6797	65.2354	53.8743	57.5157	77.5554	58.8902	30.8502	71.2085	36.0233	cysteine-type peptidase activity	-	Peptidase_C14	Name=Pfam:Peptidase_C14; Dbxref=Pfam:PF00656.17; Description=caspase domain; Ontology_term=InterPro:IPR011600; score=160.60; evalue=4.80e-47;
MMETSP0851-20130426|193246_1	0.455856	57.569	51.2789	39.9052	48.5147	30.4898	55.4712	42.7783	79.1749	15.9327	31.64	17.5928	33.5266	37.5049	38.3834	41.5095	232.038	14.8897	11.7258	22.1195	24.1436	118.846	87.7427	41.5641	36.8795	42.2115	31.3159	25.34	32.1947	Protein tyrosine kinase	-	Pkinase	Name=Pfam:Pkinase; Dbxref=Pfam:PF00069.20; Description=protein kinase domain; Ontology_term=InterPro:IPR000719; score=199.00; evalue=6.80e-59;
MMETSP0851-20130426|194763_1	0.455856	5.8569	8.11114	7.98105	9.67271	3.86115	5.75529	6.03103	37.0571	11.9495	14.3085	0.209438	7.02128	13.4209	6.26929	10.7233	113.435	1.79704	3.72596	2.76494	3.09533	25.5042	58.4426	8.53748	41.2182	11.1191	3.84173	7.85859	1.56623	FALSE	FALSE	FALSE	FALSE
MMETSP0851-20130426|101393_1	0.455856	4.71409	4.39926	7.51158	5.4409	2.796	5.63284	2.38436	0.979483	6.23452	5.03821	0	0.87766	1.10309	5.37368	6.05347	10.609	25.8003	12.9313	19.2163	14.5481	4.85795	4.56829	2.92072	4.33876	6.58912	10.1282	6.73594	13.0519	FALSE	FALSE	FALSE	FALSE
MMETSP0851-20130426|101714_1	0.455856	22.7133	23.0961	22.5347	22.9727	23.9657	19.47	23.4228	14.529	15.9327	14.107	10.053	16.8511	12.5016	17.1446	18.3334	13.3293	6.93143	7.5615	10.5068	12.5361	22.2078	10.3968	19.771	20.8803	24.9151	14.4356	29.0287	17.4026	FALSE	FALSE	FALSE	FALSE
MMETSP0851-20130426|105333_1	0.456431	6.71401	13.3353	8.45052	13.9045	13.5806	13.2249	16.1295	27.099	7.96633	95.1214	5.44539	8.07447	20.0394	7.80463	19.1981	85.4162	6.54635	12.9313	9.81554	17.9529	37.8226	95.4615	8.08814	2.16938	7.82458	14.552	11.8681	10.6156	C-4 methylsterol oxidase activity	-	FA_hydroxylase	Name=Pfam:FA_hydroxylase; Dbxref=Pfam:PF04116.8; Description=fatty acid hydroxylase superfamily; Ontology_term=InterPro:IPR006694; score=31.70; evalue=1.40e-07;
MMETSP0851-20130426|164583_1	0.456431	11.1424	5.3616	6.41614	7.1034	0.665715	3.9185	4.62847	2.93845	5.71497	0.604585	5.23595	6.49468	3.8608	6.65313	8.82077	2.99229	15.0181	3.17802	9.95379	5.26206	4.51096	0.945163	6.96479	0.542345	7.82458	1.51341	8.66049	5.56882	FALSE	FALSE	FALSE	FALSE
MMETSP0851-20130426|185657_1	0.456431	28.1417	29.4201	33.0196	25.2397	20.2377	14.5719	23.9839	21.8751	32.0385	12.6963	14.4512	27.5585	24.2679	24.3095	27.1541	96.2973	5.26275	3.06844	15.3454	12.2266	40.5986	64.2711	17.2996	40.9471	24.2974	11.9908	22.4531	16.5324	FALSE	FALSE	FALSE	Name=Pfam:IMCp; Dbxref=Pfam:PF12314.3; Description=inner membrane complex protein; Ontology_term=InterPro:IPR022086; score=60.40; evalue=1.20e-16;
MMETSP0851-20130426|165292_1	0.45764	7.57111	8.52357	3.75579	14.0557	6.65715	5.14303	5.18949	26.7725	5.36861	7.65808	3.35101	14.0426	25.5548	6.14135	8.47485	253.256	1.15524	1.20546	5.66813	3.09533	64.1944	83.962	8.08814	24.1344	4.94184	3.14323	3.04721	2.78441	FALSE	FALSE	FALSE	FALSE
MMETSP0851-20130426|179109_1	0.458465	19.9992	25.7082	25.821	19.4966	18.2406	16.0413	19.6359	32.4862	17.8376	29.0201	74.3505	21.766	34.0118	32.7539	44.1038	189.602	83.9473	191.229	37.8797	26.3103	45.2831	46.1555	27.8592	9.76222	24.5033	15.2505	35.2835	18.7948	FALSE	FALSE	FALSE	Name=Pfam:LRR_4; Dbxref=Pfam:PF12799.2; Description=leucine rich repeats (2 copies); Ontology_term=InterPro:IPR025875; score=102.40; evalue=5.10e-30;
MMETSP0851-20130426|188666_1	0.458677	26.1418	18.0095	19.4049	30.0761	39.4103	17.3883	27.35	24.9768	38.9657	43.1271	125.872	15.4468	120.236	74.8477	134.733	91.1288	737.042	668.371	660.406	309.843	124.745	376.49	75.714	23.0497	71.2448	208.035	310.976	397.648	FALSE	FALSE	FALSE	Name=Pfam:PT; Dbxref=Pfam:PF04886.7; Description=pt repeat; Ontology_term=InterPro:IPR006970; score=59.10; evalue=1.70e-16;
MMETSP0851-20130426|10578_1	0.462472	4.57124	6.04899	10.0154	6.80113	27.2943	10.8983	3.2259	6.36664	8.13951	12.0917	19.0589	8.7766	8.82469	172.981	97.7203	133.021	463.892	1497.84	351.148	102.146	242.551	104.283	8.76215	24.9479	8.44231	76.7181	365.344	155.927	Protein kinase C conserved region 2 (CalB)	-	C2	Name=Pfam:C2; Dbxref=Pfam:PF00168.25; Description=c2 domain; Ontology_term=InterPro:IPR000008; score=75.60; evalue=1.80e-21;
MMETSP0851-20130426|12245_1	0.462472	4.28554	3.29945	2.19088	5.4409	6.79029	5.75529	4.48821	8.81534	3.29044	6.44891	2.51326	2.10638	5.14773	3.7104	2.7673	1.0881	7.05979	0.876696	4.42391	1.23813	1.90848	4.41076	2.92072	2.16938	2.88274	1.74624	2.08493	2.26233	FALSE	FALSE	FALSE	FALSE
MMETSP0851-20130426|6425_1	0.462472	3.71413	4.39926	0.938947	4.68522	5.05944	2.0817	1.26231	1.63247	2.25135	2.61987	6.70202	12.6383	2.94156	4.09423	0.172956	0	10.9106	12.1642	5.39164	3.55963	2.25548	1.57527	6.06611	10.3046	5.14775	2.67757	1.76417	3.13246	FALSE	FALSE	FALSE	FALSE
MMETSP0851-20130426|9825_1	0.462472	2.42847	3.5744	6.10316	0.302272	1.59772	3.67359	2.94539	1.95897	0.173181	3.42598	0	5.79255	4.04465	1.1515	2.24843	2.99229	0.25672	0.986283	0.414741	2.01196	13.5329	1.26022	3.14539	0.271173	1.64728	1.28058	1.44342	2.43636	FALSE	FALSE	FALSE	FALSE
MMETSP0851-20130426|105339_1	0.463571	20.9991	24.4709	21.9088	16.3227	31.0223	15.1842	13.3244	17.6307	21.4744	100.764	2.51326	19.8351	38.2403	42.9894	33.2076	31.555	173.414	147.504	59.1698	55.5612	99.7615	45.5254	19.5463	33.8966	16.4728	57.0438	43.4628	54.1219	trans-synaptic signaling by soluble gas, modulating synaptic transmission	ko:K12319	Guanylate_cyc,HNOB,HNOBA	Name=Pfam:HNOB; Dbxref=Pfam:PF07700.10; Description=heme no binding; Ontology_term=InterPro:IPR011644; score=118.80; evalue=1.50e-34;
MMETSP0851-20130426|91914_1	0.464035	22.7133	18.6969	20.9698	17.8341	16.6429	17.2659	13.1841	15.3452	7.2736	12.6963	21.3627	25.6277	6.25082	17.5284	19.0252	23.1222	24.9018	23.4516	16.4514	10.3694	16.8293	10.3968	10.1102	19.5244	11.531	15.4833	13.953	13.0519	FALSE	FALSE	FALSE	Name=Pfam:PP-binding; Dbxref=Pfam:PF00550.20; Description=phosphopantetheine attachment site; Ontology_term=InterPro:IPR009081; score=42.00; evalue=7.50e-11;
MMETSP0851-20130426|195141_1	0.464035	33.4272	33.2694	32.8631	35.6681	30.0903	39.6748	36.0459	34.9349	26.1503	38.4919	27.6458	29.6649	18.9363	26.3566	27.3271	25.2984	9.62699	5.041	18.2486	24.4531	32.6177	22.3689	28.7578	27.1173	37.6815	15.2505	28.5475	23.4934	FALSE	FALSE	FALSE	Name=Pfam:HEAT_2; Dbxref=Pfam:PF13646.1; Description=heat repeats; score=75.70; evalue=2.30e-21;
MMETSP0851-20130426|10858_1	0.466572	24.5704	25.5707	20.1874	17.8341	25.2972	17.5108	22.7216	18.4469	11.0836	28.4155	13.404	20.3617	34.931	26.3566	21.1007	10.337	45.4394	27.6159	23.2255	12.5361	21.6873	18.9033	37.9693	14.9145	18.326	14.3192	10.1039	32.1947	FALSE	FALSE	FALSE	FALSE
MMETSP0851-20130426|126685_1	0.466572	5.28549	5.08665	6.25965	6.95226	5.19258	6.97982	5.47001	4.57092	6.06133	4.63515	0.628314	2.80851	5.33158	4.98984	7.09121	0.816078	6.80307	2.19174	4.7004	2.7858	3.29647	2.67796	5.3921	4.06759	4.94184	3.02681	2.40569	3.82856	FALSE	FALSE	FALSE	FALSE
MMETSP0851-20130426|156525_1	0.466572	6.28545	7.1488	5.94666	8.61476	8.38801	5.26548	4.06744	4.24443	6.75406	18.7421	3.56045	2.63298	1.65463	3.07067	4.49686	1.36013	7.18815	1.20546	5.39164	2.63103	6.24594	1.10269	11.9075	8.9487	7.20685	3.14323	2.72645	2.43636	FALSE	FALSE	FALSE	FALSE
MMETSP0851-20130426|69159_1	0.466572	23.8561	33.1319	44.913	24.9375	25.2972	30.4908	29.4539	23.3443	17.8376	18.7421	21.7816	17.0266	9.92777	22.9021	65.0315	49.7808	4.23587	6.57522	10.092	15.3219	20.9933	15.9102	14.1542	30.9137	16.6787	13.3878	15.8776	14.0961	FALSE	FALSE	FALSE	FALSE
MMETSP0851-20130426|190181_1	0.466902	6.57115	9.34843	9.70245	7.85908	8.78744	10.0411	7.01283	7.67262	0.692724	29.4231	7.95864	5.96809	24.084	5.75751	7.26416	7.34471	2.5672	6.57522	3.59442	10.3694	9.7159	9.76669	7.41413	13.0163	17.0905	10.7103	7.53784	8.52725	-	-	-	Name=Pfam:Biotin_lipoyl; Dbxref=Pfam:PF00364.17; Description=biotin-requiring enzyme; Ontology_term=InterPro:IPR000089; score=63.40; evalue=9.50e-18;
MMETSP0851-20130426|70071_1	0.466902	2.99987	5.91151	9.07649	5.28977	3.99429	3.30623	3.08564	4.89741	3.6368	2.8214	0.418876	16.1489	0	2.68684	6.74529	10.609	0.385079	2.5205	0.96773	3.2501	1.56148	4.09571	2.02204	7.32166	6.38321	3.02681	2.88683	4.69869	Cold shock protein domain	-	CSD	FALSE
MMETSP0851-20130426|135281_1	0.466902	22.5705	37.9436	23.3172	27.5068	13.5806	29.1438	14.5867	21.7119	16.9717	9.67336	17.3834	18.0798	9.37623	23.5418	16.7768	5.44052	9.24191	32.4378	14.7924	28.477	20.9933	26.307	16.8503	15.1857	12.5605	46.6828	18.9248	21.2311	erythrocyte development	ko:K15263	zf-LYAR	Name=Pfam:zf-LYAR; Dbxref=Pfam:PF08790.6; Description=lyar-type c2hc zinc finger; Ontology_term=InterPro:IPR014898; score=49.90; evalue=1.60e-13;
MMETSP0851-20130426|2184_1	0.466902	16.8564	28.0453	17.0575	21.7636	37.28	16.1638	14.0257	449.093	55.2447	1077.37	159.801	32.2979	110.676	44.013	111.038	1844.88	8.47175	6.35605	28.7554	24.9174	485.622	423.118	51.8989	298.832	1743.65	26.5428	46.0289	10.6156	fucoxanthin chlorophyll a c protein	-	Chloroa_b-bind	Name=Pfam:Chloroa_b-bind; Dbxref=Pfam:PF00504.16; Description=chlorophyll a-b binding protein; Ontology_term=InterPro:IPR022796; score=97.20; evalue=9.60e-28;
MMETSP0851-20130426|113284_1	0.466902	1.85707	2.61206	0	0.755681	16.9092	4.40831	16.8308	1.79572	5.02225	3.42598	0	0	0.551543	0.511779	4.66982	2.17621	0	0.986283	0.276494	0.309533	2.08198	3.15054	5.84144	9.21987	1.44137	1.04774	0.641518	3.82856	FALSE	FALSE	FALSE	FALSE
MMETSP0851-20130426|150537_1	0.466902	7.57111	4.67422	8.45052	8.91703	2.66286	7.71454	2.52462	3.42819	1.55863	23.5788	2.51326	1.05319	3.12541	5.62957	5.36164	10.065	0.513439	0.876696	2.3502	3.2501	18.7378	2.99302	6.96479	0.271173	3.08865	2.56115	1.60379	14.2701	FALSE	FALSE	FALSE	FALSE
MMETSP0851-20130426|170757_1	0.469413	13.428	13.4727	7.51158	10.2773	10.5183	15.1842	20.4775	18.7734	12.469	12.6963	25.9703	5.96809	12.8693	12.2827	6.57234	10.609	34.6571	23.5612	15.0689	11.7623	9.8894	10.7118	18.8723	0.813518	13.796	6.51929	12.3492	9.5714	FALSE	FALSE	FALSE	FALSE
MMETSP0851-20130426|73559_1	0.471563	2.99987	4.39926	3.28631	3.325	2.39657	3.67359	2.66487	5.8769	0.519543	3.42598	0.418876	2.63298	1.47078	2.04712	4.84277	35.6354	0.641799	0	0.552988	1.23813	10.2364	16.0678	2.24671	20.0668	1.64728	1.62982	1.28304	0.348051	FALSE	FALSE	FALSE	FALSE
MMETSP0851-20130426|136786_1	0.472126	14.8565	14.0226	10.0154	10.4284	12.5154	12.8576	15.849	15.6717	12.469	17.3314	8.37752	22.6436	16.3624	9.97969	19.89	30.1949	180.859	206.571	63.3172	88.9907	70.0933	64.9012	13.7049	21.1515	10.9132	70.4316	21.972	64.0414	GDP-mannose 4,6 dehydratase	ko:K01784	GDP_Man_Dehyd	Name=Pfam:Epimerase; Dbxref=Pfam:PF01370.16; Description=nad dependent epimerase/dehydratase family; Ontology_term=InterPro:IPR001509; score=157.80; evalue=2.60e-46;
MMETSP0851-20130426|177220_1	0.472126	0.857107	5.22412	1.56491	1.81363	4.79315	2.93887	5.32975	9.63158	10.7372	52.5989	0	0.702128	9.37623	2.55889	5.01573	4.89647	0.25672	5.47935	3.31793	5.88113	5.72544	4.72582	12.3569	5.69463	3.29456	3.14323	19.8871	4.52466	FALSE	FALSE	FALSE	Name=Pfam:DUF4116; Dbxref=Pfam:PF13475.1; Description=domain of unknown function (duf4116); Ontology_term=InterPro:IPR025197; score=54.20; evalue=6.60e-15;
MMETSP0851-20130426|190561_1	0.472597	48.1408	47.0171	40.2182	39.1443	56.5858	40.8993	41.2354	32.8127	33.0776	20.5559	24.2948	42.3032	24.2679	41.9659	30.6133	26.3865	42.4871	7.67109	41.4741	22.1316	32.6177	24.5742	36.846	35.7948	43.6529	35.274	37.0477	29.9324	Metacaspase-1-like	-	Peptidase_C14,zf-LSD1	Name=Pfam:Peptidase_C14; Dbxref=Pfam:PF00656.17; Description=caspase domain; Ontology_term=InterPro:IPR011600; score=123.20; evalue=1.20e-35;
MMETSP0851-20130426|154281_1	0.473215	3.99983	4.94917	2.66035	2.26704	1.99715	1.34698	4.76872	2.12221	20.9549	6.44891	5.23595	1.05319	10.1116	1.02356	1.72956	6.52863	6.93143	3.28761	8.57132	2.7858	2.42898	1.57527	2.69605	4.33876	2.88274	2.44473	2.72645	0.870128	FALSE	FALSE	FALSE	FALSE
MMETSP0851-20130426|8625_1	0.473752	48.7123	68.4635	49.2947	37.1795	95.7298	47.0219	36.3265	51.2596	76.0265	448.602	323.372	60.0319	169.508	350.057	233.837	216.805	911.996	1033.41	644.784	376.083	496.552	455.254	96.6084	127.451	66.7148	319.329	349.306	345.093	Ribosomal protein L16p/L10e	ko:K02866	Ribosomal_L16	Name=Pfam:Ribosomal_L16; Dbxref=Pfam:PF00252.13; Description=ribosomal protein l16p/l10e; Ontology_term=InterPro:IPR016180; score=105.70; evalue=1.30e-30;
MMETSP0851-20130426|131974_1	0.474787	14.2851	20.4841	10.6414	14.6602	12.116	18.0006	16.41	8.81534	9.00541	8.66572	0	5.44149	19.304	12.0268	18.3334	21.4901	26.9556	7.99985	14.7924	10.8337	7.80742	8.34894	5.61677	6.50814	13.3841	8.49836	16.3587	10.9636	FALSE	FALSE	FALSE	FALSE
MMETSP0851-20130426|130246_1	0.474787	2.57132	2.88702	6.25965	4.53408	4.79315	1.71434	4.48821	1.63247	2.7709	2.41834	0.418876	3.68617	4.2285	3.96629	3.97799	2.17621	7.18815	3.28761	4.28566	0.4643	2.60247	0.472582	0.898683	10.5757	2.47092	2.56115	0.481138	2.61038	FALSE	FALSE	FALSE	FALSE
MMETSP0851-20130426|138204_1	0.474787	0.999958	1.92468	3.91228	2.41818	0.133143	3.55114	0.561026	1.95897	3.29044	1.00764	3.35101	1.57979	0	6.65313	7.26416	21.218	0.12836	0.219174	0	0.773833	0.173498	0.945163	1.12335	5.15228	1.64728	1.39699	2.40569	3.13246	FALSE	FALSE	FALSE	Name=Pfam:Nuc_sug_transp; Dbxref=Pfam:PF04142.10; Description=nucleotide-sugar transporter; Ontology_term=InterPro:IPR007271; score=43.10; evalue=2.40e-11;
MMETSP0851-20130426|8369_1	0.475028	22.1419	22.2713	19.0919	17.0784	24.6315	19.47	19.6359	18.9367	19.3963	14.3085	8.16808	21.766	29.2318	17.5284	21.2736	19.3139	7.57323	14.5751	9.95379	14.7028	32.2707	25.6769	22.9164	7.32166	26.7683	16.7639	11.8681	25.9298	FALSE	FALSE	FALSE	FALSE
MMETSP0851-20130426|118245_1	0.475181	13.1423	16.4972	11.8933	18.4386	10.9177	8.69416	14.4464	9.46833	12.8154	39.9026	10.4719	7.72341	8.27314	13.5621	13.6635	21.4901	32.8601	30.3556	9.12431	11.917	5.89894	17.0129	8.98683	9.49104	9.06004	10.8267	9.94353	9.91945	ThiF family	ko:K08337	ATG7_N,ThiF	FALSE
MMETSP0851-20130426|89256_1	0.475181	15.1422	10.3108	15.6491	9.67271	23.9657	13.5923	15.9892	16.1615	10.3909	23.1758	0.209438	8.60107	20.4071	20.0873	12.4528	2.99229	61.4843	166.791	18.2486	10.5241	12.3184	18.5882	16.6256	0.813518	10.9132	16.5311	17.6417	14.2701	Trypsin-like serine protease	-	Trypsin	Name=Pfam:Trypsin; Dbxref=Pfam:PF00089.21; Description=trypsin; Ontology_term=InterPro:IPR001254; score=167.60; evalue=2.70e-49;
MMETSP0851-20130426|174977_1	0.475181	7.99967	10.1733	6.41614	8.91703	13.98	7.95944	11.9218	5.22391	12.2958	7.25502	2.51326	4.3883	2.94156	6.0134	6.74529	6.2566	24.6451	20.2736	7.88008	7.89309	10.2364	2.20538	16.401	0	8.64822	2.67757	7.69821	5.39479	FALSE	FALSE	FALSE	FALSE
MMETSP0851-20130426|143755_1	0.475181	5.71405	5.08665	7.98105	4.08068	4.79315	3.79604	3.78693	6.36664	3.80998	1.61223	20.106	7.19681	2.02232	3.96629	4.49686	4.89647	0.898519	2.84926	1.93546	3.7144	6.07244	2.20538	7.18946	1.62704	3.29456	4.07456	6.89632	4.52466	FALSE	FALSE	FALSE	FALSE
MMETSP0851-20130426|49313_1	0.475181	14.9994	15.5349	18.466	8.31249	11.8497	8.81661	12.2023	13.0598	11.9495	38.4919	11.3097	6.31915	14.1563	7.80463	16.0849	15.5055	2.5672	6.24646	9.26256	11.4527	18.7378	16.2253	10.3348	7.32166	14.0019	8.26553	13.7926	13.0519	FALSE	FALSE	FALSE	FALSE
MMETSP0851-20130426|181098_1	0.475181	3.99983	4.39926	2.81684	3.92954	5.19258	1.83679	2.10385	3.75468	0	0.201528	3.35101	3.68617	6.80236	1.91917	7.95599	2.17621	0.385079	0.876696	0.691235	3.09533	5.03145	0.472582	3.14539	0.813518	4.1182	2.32832	4.651	3.48051	FALSE	FALSE	FALSE	FALSE
MMETSP0851-20130426|118155_1	0.475664	9.57103	75.6123	10.3284	13.1488	47.1326	18.2455	12.3426	10.9376	18.0108	27.6094	17.3834	15.4468	2.20617	91.3525	168.286	48.9647	667.599	559.113	257.416	122.575	370.072	112.002	19.3217	17.0839	17.9142	81.3747	303.117	204.828	Belongs to the cyclin family	-	Cyclin_N	Name=Pfam:Cyclin_N; Dbxref=Pfam:PF00134.18; Description=cyclin n-terminal domain; Ontology_term=InterPro:IPR006671; score=46.10; evalue=2.80e-12;
MMETSP0851-20130426|158073_1	0.475664	37.2842	26.2581	30.6723	35.3659	23.5663	43.1034	25.3864	79.9911	19.5695	102.981	44.1914	29.6649	36.5857	27.6361	32.5158	223.606	5.26275	7.78068	25.9905	25.0722	91.2601	69.1544	30.7799	40.9471	27.5919	27.9398	20.5286	21.5792	cysteine-type peptidase activity	ko:K01363,ko:K01365,ko:K01366,ko:K08568	Inhibitor_I29,Peptidase_C1	Name=Pfam:Peptidase_C1; Dbxref=Pfam:PF00112.18; Description=papain family cysteine protease; Ontology_term=InterPro:IPR000668; score=138.30; evalue=2.90e-40;
MMETSP0851-20130426|195370_1	0.475664	48.2837	54.5783	44.7565	44.434	47.7983	44.328	47.9677	73.9509	40.3512	41.7164	23.8759	27.0319	32.3572	55.4001	66.4152	170.56	11.424	11.397	32.2116	19.3458	114.856	170.917	45.6081	46.6417	43.6529	24.7966	24.8588	28.8882	FALSE	FALSE	FALSE	FALSE
MMETSP0851-20130426|173242_1	0.475664	27.2846	36.019	22.6912	25.9954	27.6937	18.123	30.7162	39.6691	43.6416	19.3467	15.4984	21.5904	31.2541	20.727	19.0252	5.71255	8.98519	5.15059	15.4837	18.572	24.8103	17.8006	39.3174	48.8111	38.2992	25.7279	27.1041	20.361	FALSE	FALSE	FALSE	Name=Pfam:Sugar_tr; Dbxref=Pfam:PF00083.19; Description=sugar (and other) transporter; Ontology_term=InterPro:IPR005828; score=68.40; evalue=4.00e-19;
MMETSP0851-20130426|159858_1	0.476011	14.8565	15.9473	23.0042	12.9977	31.1555	17.6332	25.3864	22.8546	25.6308	10.8825	12.7757	27.383	22.7971	22.9021	19.717	18.4978	5.51947	2.08215	8.29483	8.04786	20.4728	11.657	15.0529	24.4055	28.0037	13.2714	28.0664	15.6623	FALSE	FALSE	FALSE	FALSE
MMETSP0851-20130426|178290_1	0.476302	24.999	26.1206	27.386	22.8216	21.3029	26.6947	17.2516	26.7725	11.7763	25.191	27.6458	15.9734	13.0532	14.7136	26.8082	9.79294	11.5524	24.4379	15.2072	25.846	28.1067	27.0947	14.6036	18.4397	10.9132	30.0353	28.0664	29.2363	FALSE	FALSE	FALSE	FALSE
MMETSP0851-20130426|192432_1	0.477697	50.9979	56.0906	42.8786	56.2227	48.9966	57.4304	53.578	59.5852	25.1112	47.1576	11.938	37.0372	39.8949	44.1409	40.8177	51.957	11.1673	12.8217	23.502	28.1675	41.9866	31.0329	36.172	44.2011	60.7434	31.7815	39.293	28.8882	FALSE	FALSE	FALSE	FALSE
MMETSP0851-20130426|192087_1	0.478273	72.1398	79.5992	77.9326	83.8806	87.2087	108.616	91.307	53.5451	56.457	83.8358	42.3065	65.649	75.0098	72.0329	70.2202	85.6882	24.3884	18.0819	44.5156	46.7395	75.8187	43.9501	67.1765	62.0985	79.0694	54.3662	57.4159	61.083	FALSE	FALSE	FALSE	Name=Pfam:ketoacyl-synt; Dbxref=Pfam:PF00109.21; Description=beta-ketoacyl synthase n-terminal domain; Ontology_term=InterPro:IPR014030; score=129.70; evalue=1.10e-37;
MMETSP0851-20130426|58766_1	0.479194	16.4279	21.8588	13.1453	23.275	17.4417	16.7761	16.1295	11.4273	9.17859	32.2445	20.3155	12.1117	11.7662	23.6698	19.5441	12.5132	13.4778	14.0271	21.843	75.5261	28.2802	25.6769	25.1631	14.9145	19.9733	49.7096	35.6042	30.8025	FALSE	FALSE	FALSE	FALSE
MMETSP0851-20130426|116254_1	0.479423	11.2852	14.0226	8.76351	10.5795	7.7223	11.3881	10.7998	71.1757	2.94408	25.5941	11.7285	20.1862	19.1202	12.5386	14.7013	318.543	11.6807	10.4108	11.4745	13.0004	86.2286	72.1475	13.0309	78.6401	10.0896	33.877	108.256	10.6156	-	-	Asp_protease_2	Name=Pfam:Asp_protease_2; Dbxref=Pfam:PF13650.1; Description=aspartyl protease; score=52.20; evalue=5.70e-14;
MMETSP0851-20130426|34015_1	0.482586	237.133	178.445	200.935	198.895	121.693	225.069	191.45	151.167	161.405	75.9762	111.421	185.537	91.0046	196.651	179.01	25.5705	110.646	33.5336	135.067	57.8827	103.578	68.3668	98.4057	185.211	171.111	96.1596	81.4728	90.4933	intraciliary transport	ko:K19683	TPR_16,TPR_19,TPR_2,TPR_6,TPR_7	Name=Pfam:TPR_11; Dbxref=Pfam:PF13414.1; Description=tpr repeat; score=46.80; evalue=1.50e-12;
MMETSP0851-20130426|20540_1	0.482586	4.71409	3.5744	4.06877	4.23181	3.728	5.38793	2.24411	0.326494	10.2177	0	1.25663	0.351064	0	2.43095	0.864781	0	0	0.109587	0	0.309533	1.90848	0	0.674012	0	5.55957	1.04774	1.28304	0.174026	FALSE	FALSE	FALSE	FALSE
MMETSP0851-20130426|136010_1	0.482586	4.28554	1.7872	2.34737	3.7784	1.99715	5.02057	1.96359	4.24443	16.279	1.20917	0.837752	2.45745	0.183848	1.1515	0.864781	0	6.93143	9.75324	0.552988	1.54767	1.38799	0.472582	2.02204	5.9658	5.35366	0.814911	2.08493	0.522077	FALSE	FALSE	FALSE	FALSE
MMETSP0851-20130426|111710_1	0.48405	10.9995	11.9605	9.54596	18.4386	14.1132	13.5923	12.7633	20.0794	20.089	46.3515	9.00583	9.12766	15.9947	9.85174	21.4466	16.0495	7.70159	12.7121	6.77411	15.4767	11.6244	19.3758	19.771	13.8298	20.3851	21.3041	17.8021	12.8779	-	-	-	FALSE
MMETSP0851-20130426|152369_1	0.484151	14.9994	11.1356	8.29403	16.1716	6.39087	8.69416	10.7998	12.0803	1.90499	27.4079	14.0323	3.68617	4.78004	6.39724	6.91825	20.402	1.02688	5.58894	5.25339	8.35739	12.1449	17.328	10.7842	0.542345	6.58912	8.61478	7.37746	9.74543	Prevents misfolding and promotes the refolding and proper assembly of unfolded polypeptides generated under stress conditions	ko:K04077	Cpn60_TCP1	Name=Pfam:Cpn60_TCP1; Dbxref=Pfam:PF00118.19; Description=tcp-1/cpn60 chaperonin family; Ontology_term=InterPro:IPR002423; score=149.70; evalue=9.50e-44;
MMETSP0851-20130426|9421_1	0.484151	13.2852	14.71	11.1109	8.91703	17.708	13.1025	17.5321	18.1204	11.0836	18.7421	35.6045	14.9202	25.9225	13.6901	10.5503	23.3942	23.3615	3.17802	10.645	4.79776	10.4099	11.342	23.8151	31.1849	18.326	9.77894	11.5473	8.00517	FALSE	FALSE	FALSE	FALSE
MMETSP0851-20130426|193362_1	0.485379	43.1411	36.2939	39.4358	35.6681	43.1383	34.4093	29.3136	57.1365	26.3235	38.0889	63.0408	33	75.3775	47.4675	47.217	63.9261	23.8749	30.3556	156.496	36.5249	40.9456	34.8135	51.2249	67.7932	57.037	27.1249	81.6332	34.8051	FALSE	FALSE	FALSE	Name=Pfam:CotH; Dbxref=Pfam:PF08757.6; Description=coth protein; Ontology_term=InterPro:IPR014867; score=94.60; evalue=5.80e-27;
MMETSP0851-20130426|137949_1	0.48637	1.85707	2.19963	1.87789	1.6625	2.52972	2.93887	1.96359	2.61195	0.173181	3.02293	0	0.175532	0	2.68684	2.7673	8.16078	1.02688	0.219174	0.276494	1.08337	8.15442	9.60916	1.57269	0.271173	2.0591	1.04774	3.36797	2.43636	FALSE	FALSE	FALSE	FALSE
MMETSP0851-20130426|10652_1	0.487729	39.2841	35.3316	26.6035	27.0534	31.688	31.4704	39.8329	35.0981	41.3903	20.1528	20.7344	38.617	19.4878	24.4374	35.1101	56.0374	10.5255	9.53407	27.7877	32.1914	45.63	18.1156	34.1499	31.9984	41.182	36.4382	66.0763	31.4986	FALSE	FALSE	FALSE	FALSE
MMETSP0851-20130426|80120_1	0.487729	31.713	21.9963	26.76	21.0079	18.5069	28.8989	21.4593	38.6896	5.88815	15.9207	11.3097	15.6223	14.1563	22.1344	26.1164	72.903	8.85683	5.69852	13.963	21.203	40.4251	33.3958	52.5729	11.3893	20.7969	21.0713	53.8875	20.709	FALSE	FALSE	FALSE	FALSE
MMETSP0851-20130426|192285_1	0.488325	9.85673	14.71	12.5193	14.9625	15.3114	14.5719	24.2644	13.5495	11.4299	48.5683	6.0737	10.5319	20.7748	11.1312	19.3711	19.3139	2.43884	6.35605	7.18885	11.1432	13.5329	6.61614	12.5816	4.06759	17.0905	14.0863	9.78315	11.1376	PFAM blue (type 1) copper domain protein	-	fn3_3	Name=Pfam:Cupredoxin_1; Dbxref=Pfam:PF13473.1; Description=cupredoxin-like domain; score=27.20; evalue=2.50e-06;
MMETSP0851-20130426|140753_1	0.488325	3.85698	2.06215	4.38175	2.56931	1.06514	1.46944	2.52462	6.52989	10.7372	1.00764	3.76988	1.22872	1.10309	2.17506	2.59434	24.7544	0.898519	0.109587	0.691235	0.928599	8.50142	11.342	0.898683	1.35586	2.26501	1.97907	3.68873	2.61038	FALSE	FALSE	FALSE	FALSE
MMETSP0851-20130426|161959_1	0.488325	31.4273	30.2449	35.8365	33.8545	26.6286	28.654	21.1787	26.6093	15.5863	36.6782	14.4512	16.5	16.1786	21.4947	23.0032	31.555	6.54635	5.15059	12.9952	11.917	20.8198	16.0678	23.8151	17.0839	24.9151	18.5101	26.4626	14.6181	FALSE	FALSE	FALSE	Name=Pfam:cNMP_binding; Dbxref=Pfam:PF00027.24; Description=cyclic nucleotide-binding domain; Ontology_term=InterPro:IPR000595; score=31.60; evalue=9.50e-08;
MMETSP0851-20130426|187166_1	0.490423	2.14277	1.92468	2.97333	3.02272	1.864	1.46944	0.561026	14.8555	0.173181	6.85197	0	3.8617	9.37623	2.81478	5.88051	90.3127	0.770159	0.876696	0.691235	0.773833	23.2488	14.65	1.57269	1.35586	3.08865	0.814911	1.92455	2.08831	FALSE	FALSE	FALSE	FALSE
MMETSP0851-20130426|2187_1	0.490761	1.85707	2.61206	3.91228	2.87159	3.19543	0.122453	3.92718	4.08118	2.94408	11.2856	2.93213	2.28192	0.367695	1.66328	7.26416	5.71255	0	2.41091	1.24422	0.928599	15.4413	3.30807	5.16742	26.0326	7.20685	0.698496	4.97176	1.91428	FALSE	FALSE	FALSE	FALSE
MMETSP0851-20130426|122504_1	0.491433	15.5708	10.8607	8.92	7.40567	13.1812	10.0411	15.4282	30.6905	10.9104	31.4384	0.209438	8.07447	43.2042	12.5386	26.2893	173.009	4.10751	3.50678	5.39164	5.88113	42.5071	48.5184	9.88551	43.3876	10.0896	6.98496	9.30201	12.1818	-	-	-	FALSE
MMETSP0851-20130426|186410_1	0.49197	8.42822	19.3842	17.84	9.97499	9.5863	10.8983	15.288	9.95807	3.46362	22.7727	50.2651	13.867	4.2285	11.0032	11.761	15.7775	3.08064	7.78068	4.56215	9.90506	32.2707	11.8145	14.6036	0.271173	18.9437	9.89535	20.8493	6.43894	ABC transporter	-	ABC_tran	Name=Pfam:ABC_tran; Dbxref=Pfam:PF00005.22; Description=abc transporter; Ontology_term=InterPro:IPR003439; score=49.90; evalue=3.20e-13;
MMETSP0851-20130426|7475_1	0.49197	8.71392	9.62339	8.76351	6.04545	7.05658	5.51038	4.62847	7.01963	12.1227	14.107	4.81707	10.7074	5.14773	6.26929	6.05347	2.72026	2.69556	3.28761	4.56215	14.0838	5.55194	9.92421	6.06611	13.0163	8.03049	8.96403	10.4247	6.26492	FALSE	FALSE	FALSE	FALSE
MMETSP0851-20130426|188393_1	0.49197	5.14264	7.97366	4.22526	4.83636	6.12458	4.77567	8.69591	7.18287	2.94408	2.01528	14.4512	3.51064	2.94156	4.8619	5.70756	3.53634	9.75534	0.767109	7.88008	2.94056	4.33746	2.20538	5.3921	2.16938	6.79503	1.16416	4.81138	7.13505	FALSE	FALSE	FALSE	FALSE
MMETSP0851-20130426|138987_1	0.49197	52.5692	53.2036	42.5656	44.5852	58.1835	58.4101	47.8275	34.2819	20.089	34.4614	27.8553	47.9202	48.3519	50.922	42.7202	47.8766	13.0927	10.3012	30.6909	27.5484	55.1725	45.5254	29.2072	57.2174	36.0342	33.295	46.51	48.031	FALSE	FALSE	FALSE	Name=Pfam:KR; Dbxref=Pfam:PF08659.5; Description=kr domain; Ontology_term=InterPro:IPR013968; score=98.30; evalue=3.60e-28;
MMETSP0851-20130426|9498_1	0.492205	69.2828	50.1791	57.9017	64.6863	53.9229	57.308	55.2611	52.7288	44.1612	155.177	26.8081	30.8936	16.5463	55.7839	48.6007	174.097	9.75534	8.4382	26.6817	9.59552	82.5852	113.42	31.9032	36.6083	38.0933	36.7874	29.6702	24.3636	sterol 24-C-methyltransferase activity	ko:K00559,ko:K08242	Methyltransf_11,Sterol_MT_C	Name=Pfam:Methyltransf_11; Dbxref=Pfam:PF08241.7; Description=methyltransferase domain; Ontology_term=InterPro:IPR013216; score=58.50; evalue=6.30e-16;
MMETSP0851-20130426|9308_1	0.492205	47.2837	52.6537	44.4435	42.7715	39.6766	41.3891	41.7965	150.024	37.9266	204.148	47.333	25.8032	52.0289	34.4171	38.9151	245.912	21.6928	7.89026	27.2347	27.7032	213.403	207.306	45.1588	97.0798	27.1801	29.8025	40.2552	24.5376	FALSE	FALSE	FALSE	FALSE
MMETSP0851-20130426|109040_1	0.492205	0.285702	1.7872	3.5993	3.17386	0.532572	0.367359	1.68308	9.79483	15.2399	1.81376	6.49258	11.234	0.551543	0.895613	4.32391	18.7698	0	1.75339	0.691235	0.928599	8.15442	9.60916	0.224671	0	10.0896	0.116416	2.88683	1.3922	FALSE	FALSE	FALSE	FALSE
MMETSP0851-20130426|887_1	0.492205	7.14256	2.61206	2.03439	6.95226	5.85829	7.46963	3.92718	4.08118	1.03909	3.62751	9.00583	6.31915	0.367695	2.43095	2.07547	1.63216	0	0	0	0.154767	0.520495	0	2.69605	0	2.88274	1.39699	0.160379	1.04415	FALSE	FALSE	FALSE	FALSE
MMETSP0851-20130426|6360_1	0.492205	12.2852	23.646	18.3095	17.5318	27.6937	13.2249	17.3918	15.3452	14.2008	30.8338	26.8081	22.6436	18.5686	15.7372	14.5283	78.0715	8.60011	15.6709	17.5574	20.7387	34.1792	49.306	9.43617	8.40635	26.3565	26.1936	25.8211	22.1012	FALSE	FALSE	FALSE	Name=Pfam:Choline_kinase; Dbxref=Pfam:PF01633.15; Description=choline/ethanolamine kinase; score=88.40; evalue=4.10e-25;
MMETSP0851-20130426|194626_1	0.492205	4.71409	9.34843	8.13754	4.53408	3.86115	4.04095	4.34795	3.26494	0.346362	4.83668	6.70202	1.05319	8.45699	25.9728	44.6227	6.80065	45.6961	146.189	134.514	19.191	20.8198	25.5194	3.59473	1.89821	8.64822	28.0562	65.2744	44.0285	FALSE	FALSE	FALSE	FALSE
MMETSP0851-20130426|117726_1	0.493154	12.2852	20.0716	14.0842	16.7761	36.7475	12.4902	12.3426	76.0732	4.50271	11.8902	24.0854	20.3617	35.1149	22.5183	40.6447	420.008	9.8837	7.5615	11.3363	14.0838	106.875	288.432	13.7049	85.6906	19.5614	17.2296	15.8776	13.4	-	-	-	FALSE
MMETSP0851-20130426|54387_1	0.493154	24.4276	27.9078	24.0996	33.7034	42.7389	29.8785	29.8746	31.6699	11.9495	82.0221	24.0854	28.7872	31.4379	24.0536	30.9592	34.8193	34.2721	25.9721	45.4833	23.834	26.1982	16.8554	13.4802	28.202	18.7378	29.104	37.208	19.1428	Glycosyltransferase (GlcNAc)	-	GlcNAc	Name=Pfam:GlcNAc; Dbxref=Pfam:PF11397.3; Description=glycosyltransferase (glcnac); Ontology_term=InterPro:IPR021067; score=200.90; evalue=2.60e-59;
MMETSP0851-20130426|190056_1	0.493154	6.99971	7.1488	15.0232	12.6954	10.7846	13.2249	13.6049	11.7538	4.15634	23.7804	7.12089	10.7074	3.4931	8.31641	15.3931	29.9229	35.5557	136.874	16.3132	10.2146	16.1353	12.1296	18.8723	32.8119	12.3546	14.9012	15.3964	8.35322	FALSE	FALSE	FALSE	FALSE
MMETSP0851-20130426|173655_1	0.493808	4.71409	9.07348	11.4239	4.38295	9.5863	6.49001	5.75052	8.6521	2.42453	2.61987	11.938	7.89894	7.7216	2.55889	6.22642	9.79294	1.15524	1.42463	1.38247	3.09533	3.81696	2.83549	5.3921	6.23697	7.41276	4.54022	5.61328	4.35064	FALSE	FALSE	FALSE	FALSE
MMETSP0851-20130426|190578_1	0.493808	5.42834	11.6855	5.63368	13.7534	8.92058	7.22473	5.75052	9.14184	4.84907	4.83668	12.5663	11.0585	3.4931	6.39724	2.94026	8.97686	0.770159	2.41091	1.79721	4.02393	4.51096	2.67796	3.8194	8.13518	5.55957	3.95814	4.97176	2.78441	FALSE	FALSE	FALSE	FALSE
MMETSP0851-20130426|186397_1	0.493808	5.71405	17.0471	11.7368	8.7659	6.92344	6.49001	10.6595	14.2025	5.54179	10.4795	0.628314	7.02128	9.19238	4.73395	5.18869	34.2753	1.54032	2.30133	4.14741	5.10729	14.4004	11.657	5.3921	8.9487	7.82458	3.02681	12.8304	7.83115	FALSE	FALSE	FALSE	FALSE
MMETSP0851-20130426|32122_1	0.493808	2.57132	3.5744	6.57263	6.49886	6.79029	11.3881	6.4518	14.0393	9.35177	6.24738	7.74921	8.07447	11.3986	8.31641	15.912	4.62444	16.8151	2.84926	16.4514	9.75029	2.08198	8.82152	3.14539	17.8974	3.08865	6.98496	4.651	4.35064	FALSE	FALSE	FALSE	FALSE
MMETSP0851-20130426|9583_1	0.493808	26.5703	33.5444	20.3439	22.3682	23.4332	14.4495	25.2462	29.711	27.0162	17.7345	33.0912	23.6968	36.0341	29.4273	30.0944	82.968	15.1465	25.5338	13.8247	24.2983	38.1696	48.5184	30.7799	22.7785	35.0047	28.8711	28.5475	20.187	FALSE	FALSE	FALSE	Name=Pfam:Alpha_L_fucos; Dbxref=Pfam:PF01120.12; Description=alpha-l-fucosidase; Ontology_term=InterPro:IPR000933; score=56.50; evalue=1.90e-15;
MMETSP0851-20130426|143369_1	0.493808	5.14264	8.936	8.76351	5.28977	5.05944	8.69416	6.87257	5.22391	6.06133	0.806114	7.95864	8.07447	4.78004	4.09423	2.42139	6.2566	7.31651	11.7258	2.90319	1.23813	3.29647	0.787636	2.92072	5.42345	4.94184	1.74624	4.33025	3.30648	FALSE	FALSE	FALSE	FALSE
MMETSP0851-20130426|161239_1	0.495421	13.9994	17.3221	19.2484	25.0886	17.3086	19.7149	20.6177	7.67262	4.84907	32.6476	23.0382	14.2181	15.8109	14.8416	28.0189	34.0033	32.6034	23.5612	30.1379	16.56	17.8703	16.0678	17.5243	11.6604	27.7978	17.9281	23.0946	8.52725	FALSE	FALSE	FALSE	FALSE
MMETSP0851-20130426|192437_1	0.495859	11.5709	13.8852	10.7979	17.3807	13.4474	16.0413	15.7087	22.3649	7.79314	19.7498	0.628314	7.89894	16.914	11.2591	31.478	87.3204	5.13439	2.08215	7.74184	8.66692	42.6806	74.5104	11.4582	9.76222	15.0314	8.96403	10.2643	6.61297	FALSE	FALSE	FALSE	FALSE
MMETSP0851-20130426|149460_1	0.496751	0.714256	2.06215	1.09544	0	1.73086	1.34698	3.2259	1.46922	6.58088	9.47183	24.0854	4.9149	0	0.895613	0	5.71255	0.12836	2.30133	0.414741	1.08337	3.64346	2.52044	1.79737	7.05049	3.08865	0.58208	2.72645	2.61038	FALSE	FALSE	FALSE	FALSE
MMETSP0851-20130426|688_1	0.49725	71.2827	75.3374	71.2035	51.5374	17.708	67.2267	13.3244	22.3649	9.17859	9.67336	27.4364	10.7074	3.12541	14.5857	10.5503	0.544052	27.469	5.041	54.1929	7.58356	26.1982	6.61614	7.18946	64.2679	9.26595	9.66252	26.1419	9.5714	protein conserved in bacteria	-	-	FALSE
MMETSP0851-20130426|6874_1	0.49969	33.2843	39.1809	28.4814	45.6431	51.5264	26.2049	31.9785	28.0785	26.3235	73.3563	29.5308	24.3989	42.1011	39.5349	37.0126	86.2323	37.8661	46.4649	31.7968	86.6692	53.7845	178.006	44.0354	49.3534	32.1219	99.5356	39.1326	76.9193	1-deoxy-D-xylulose-5-phosphate synthase	ko:K01662	DXP_synthase_N,Transket_pyr,Transketolase_C	Name=Pfam:DXP_synthase_N; Dbxref=Pfam:PF13292.1; Description=1-deoxy-d-xylulose-5-phosphate synthase; Ontology_term=InterPro:IPR005477; score=344.30; evalue=2.90e-103;
MMETSP0851-20130426|136748_1	0.500568	22.4276	19.1093	41.0007	31.4363	17.3086	18.3679	16.41	11.917	10.564	22.1681	12.7757	18.2553	22.4294	14.0739	13.8365	11.9692	27.5974	8.65737	13.8247	15.3219	16.3088	7.24625	19.097	9.21987	17.9142	14.6684	6.73594	11.1376	DNA repair protein RAD50	ko:K10866	AAA_23,Rad50_zn_hook	FALSE
MMETSP0851-20130426|81152_1	0.500568	7.14256	10.5857	7.19859	13.3	11.5834	4.53076	8.69591	11.917	7.2736	16.7269	10.8908	7.89894	12.1339	29.9391	22.6573	30.4669	282.135	248.543	128.017	146.1	75.4718	140.672	10.3348	10.3046	9.26595	103.727	66.0763	147.922	The coatomer is a cytosolic protein complex that binds to dilysine motifs and reversibly associates with Golgi non- clathrin-coated vesicles, which further mediate biosynthetic protein transport from the ER, via the Golgi up to the trans Golgi network. The coatomer complex is required for budding from Golgi membranes, and is essential for the retrograde Golgi-to-ER transport of dilysine-tagged pr…	ko:K17268	Coatomer_E	Name=Pfam:Coatomer_E; Dbxref=Pfam:PF04733.9; Description=coatomer epsilon subunit; Ontology_term=InterPro:IPR006822; score=172.80; evalue=7.90e-51;
MMETSP0851-20130426|148823_1	0.500568	2.71417	3.16197	5.3207	3.7784	3.728	3.06132	4.2077	7.99911	0.173181	0.604585	3.97932	6.31915	2.57387	3.7104	3.11321	3.53634	0.898519	0.109587	0.414741	1.70243	3.81696	0.630109	37.52	1.08469	2.0591	2.09549	31.5948	2.26233	FALSE	FALSE	FALSE	FALSE
MMETSP0851-20130426|139464_1	0.500568	4.99979	4.53674	2.19088	2.72045	5.45886	6.61246	7.29334	3.26494	0.865905	1.81376	3.56045	6.31915	3.4931	3.83834	1.38365	3.80837	3.08064	0	5.80638	1.08337	1.90848	0.945163	4.04407	0.542345	3.70638	1.62982	2.72645	1.91428	FALSE	FALSE	FALSE	Name=Pfam:CBS; Dbxref=Pfam:PF00571.23; Description=cbs domain; Ontology_term=InterPro:IPR000644; score=30.50; evalue=1.80e-07;
MMETSP0851-20130426|120662_1	0.500568	30.5702	28.0453	29.4203	29.6227	23.8326	23.0212	28.6123	23.1811	40.5244	23.9819	11.3097	16.5	36.7695	25.7169	25.2516	22.8502	6.41799	7.12315	10.3685	16.56	22.3813	19.6909	18.6477	12.7451	22.856	18.3937	16.3587	13.574	FALSE	FALSE	FALSE	FALSE
MMETSP0851-20130426|51780_1	0.500568	38.1413	45.6423	33.3326	30.3784	27.96	38.2053	25.2462	29.058	19.2231	18.9437	41.0498	22.8192	31.0702	15.9931	22.3114	85.9603	6.93143	5.58894	13.5482	18.1077	42.1601	45.6829	18.6477	3.79642	29.651	18.9758	23.8965	14.0961	FALSE	FALSE	FALSE	Name=Pfam:PP-binding; Dbxref=Pfam:PF00550.20; Description=phosphopantetheine attachment site; Ontology_term=InterPro:IPR009081; score=35.80; evalue=6.40e-09;
MMETSP0851-20130426|171103_1	0.500632	19.7135	30.2449	32.3937	21.6125	26.096	21.5517	27.7708	29.2212	22.5135	74.5655	16.755	51.4309	11.5824	16.249	19.1981	15.7775	30.2929	22.1366	23.7785	14.7028	21.5138	7.24625	21.119	9.76222	38.0933	13.3878	21.1701	16.5324	FALSE	FALSE	FALSE	FALSE
MMETSP0851-20130426|168916_1	0.500632	6.57115	3.29945	7.98105	4.98749	2.13029	7.34718	5.32975	8.3256	0.173181	1.4107	2.09438	0.351064	0.367695	1.91917	4.32391	2.17621	0	0.109587	2.62669	1.70243	14.5739	82.8593	1.12335	0	2.0591	1.97907	1.28304	1.91428	FALSE	FALSE	FALSE	FALSE
MMETSP0851-20130426|3191_1	0.501028	33.9986	33.5444	32.8631	37.0284	26.6286	16.8985	27.6305	31.5067	15.5863	29.6247	73.0939	32.8245	37.5049	23.5418	30.9592	51.4129	95.4997	76.7109	56.2666	52.1563	37.9961	49.4635	25.8371	11.3893	28.2097	38.8829	42.5006	53.9479	alpha-(1->3)-fucosyltransferase activity	ko:K09669	Glyco_transf_10	Name=Pfam:Glyco_transf_10; Dbxref=Pfam:PF00852.14; Description=glycosyltransferase family 10 (fucosyltransferase); Ontology_term=InterPro:IPR001503; score=108.40; evalue=2.50e-31;
MMETSP0851-20130426|9597_1	0.501028	8.14252	14.2976	15.8056	12.9977	19.4389	7.34718	11.0803	21.2221	5.36861	19.9513	7.74921	15.4468	41.7334	45.9322	65.2045	34.2753	48.0066	33.0953	94.2845	21.8221	22.5548	36.2313	5.84144	1.89821	11.531	27.5906	50.3592	32.5428	Belongs to the mitochondrial carrier (TC 2.A.29) family	-	Mito_carr	Name=Pfam:Mito_carr; Dbxref=Pfam:PF00153.22; Description=mitochondrial carrier protein; Ontology_term=InterPro:IPR018108; score=72.50; evalue=1.50e-20;
MMETSP0851-20130426|125608_1	0.501028	33.8557	26.3956	25.3516	30.5295	26.6286	40.5319	28.8929	21.8751	23.7258	17.1299	14.6607	18.9575	8.45699	14.2019	19.0252	13.6013	18.8689	5.80811	20.0458	10.0598	19.0848	5.67098	19.9957	21.6938	15.0314	10.8267	17.9625	12.3558	Belongs to the TRAFAC class myosin-kinesin ATPase superfamily. Myosin family	ko:K10357	DIL,IQ,Myosin_N,Myosin_head	Name=Pfam:Myosin_head; Dbxref=Pfam:PF00063.16; Description=myosin head (motor domain); Ontology_term=InterPro:IPR001609; score=193.10; evalue=5.60e-57;
MMETSP0851-20130426|155880_1	0.501028	17.285	12.6479	12.8323	14.5091	15.0452	17.3883	13.3244	10.7743	9.17859	20.5559	3.97932	5.26596	16.3624	11.0032	8.3019	4.35242	31.8332	16.438	36.6355	23.215	13.7064	22.0538	16.6256	4.88111	12.5605	21.8862	19.4059	22.7973	FALSE	FALSE	FALSE	FALSE
MMETSP0851-20130426|11582_1	0.501028	8.42822	12.5104	12.9888	7.70794	9.98573	10.531	9.6777	3.75468	16.7986	17.3314	14.8701	8.7766	9.37623	8.82819	6.39938	1.36013	0.385079	2.63009	3.17968	5.26206	6.24594	4.41076	6.29078	18.4397	5.76548	4.19097	8.17935	4.69869	FALSE	FALSE	FALSE	FALSE
MMETSP0851-20130426|35439_2	0.501028	5.14264	4.26179	4.69474	6.04545	7.32287	7.22473	3.50641	8.81534	1.03909	0	0.209438	8.7766	1.10309	1.40739	2.94026	0	2.05376	0.219174	3.04144	0.309533	0.520495	0	2.92072	3.25407	1.64728	1.39699	0	0.870128	FALSE	FALSE	FALSE	FALSE
MMETSP0851-20130426|5421_1	0.501028	13.2852	15.9473	18.153	18.2875	7.98858	11.5106	10.5192	11.7538	7.2736	14.7116	7.53977	14.3936	15.0755	9.46791	14.8742	26.3865	3.33735	3.17802	10.3685	13.7742	14.2269	9.92421	12.8062	4.88111	12.5605	16.8803	16.6795	13.0519	FALSE	FALSE	FALSE	Name=Pfam:Ank_5; Dbxref=Pfam:PF13857.1; Description=ankyrin repeats (many copies); score=44.60; evalue=9.80e-12;
MMETSP0851-20130426|1741_1	0.501028	8.57107	7.83619	3.12982	10.1261	8.92058	11.8779	11.7816	6.85638	1.03909	8.26266	6.49258	8.07447	4.04465	52.3294	108.444	20.1299	20.6659	99.8338	157.187	7.89309	20.9933	24.4167	2.24671	12.7451	8.85413	7.3342	75.218	26.6259	FALSE	FALSE	FALSE	FALSE
MMETSP0851-20130426|195095_1	0.501076	76.4254	59.1151	53.6765	66.1976	49.6623	58.0427	52.7365	42.7707	41.7366	42.1194	29.9496	47.2181	51.6612	45.1645	43.412	38.8997	70.2128	57.2044	33.1793	32.501	42.6806	27.2522	26.7358	39.8624	60.7434	38.1844	44.2647	30.2804	FALSE	FALSE	FALSE	Name=Pfam:ketoacyl-synt; Dbxref=Pfam:PF00109.21; Description=beta-ketoacyl synthase n-terminal domain; Ontology_term=InterPro:IPR014030; score=120.00; evalue=1.10e-34;
MMETSP0851-20130426|2512_1	0.501076	2.42847	6.46142	5.00772	4.68522	5.72515	3.30623	7.85437	3.91793	7.79314	5.44127	2.30382	4.21277	10.4793	6.0134	8.47485	5.1685	2.82392	5.26018	2.90319	8.20263	9.02191	10.8694	6.06611	0.813518	4.32411	8.38195	5.4529	10.7896	FALSE	FALSE	FALSE	FALSE
MMETSP0851-20130426|195390_1	0.503069	18.8564	17.3221	17.9965	17.5318	24.0989	16.7761	21.1787	19.5897	6.23452	22.3697	15.289	8.7766	30.3349	14.5857	21.4466	11.9692	5.13439	9.86283	11.6128	21.3578	16.4823	17.4855	17.9737	20.8803	17.0905	12.3401	22.2927	15.6623	Belongs to the glycosyl hydrolase 3 family	ko:K05349	Glyco_hydro_3,Glyco_hydro_3_C	Name=Pfam:Glyco_hydro_3; Dbxref=Pfam:PF00933.16; Description=glycosyl hydrolase family 3 n terminal domain; Ontology_term=InterPro:IPR001764; score=93.30; evalue=1.10e-26;
MMETSP0851-20130426|27013_1	0.503069	17.5707	20.3466	58.5277	21.3102	45.9343	37.5931	38.7108	71.5022	117.07	40.5072	51.9406	167.457	56.8089	16.121	53.2705	65.5583	62.2545	29.6981	17.8339	13.1552	16.8293	13.0748	30.1059	75.6572	24.2974	12.4565	29.1891	22.4493	Produces ATP from ADP in the presence of a proton gradient across the membrane. The alpha chain is a regulatory subunit	ko:K02111	ATP-synt_ab,ATP-synt_ab_C,ATP-synt_ab_N	Name=Pfam:ATP-synt_ab; Dbxref=Pfam:PF00006.20; Description=atp synthase alpha/beta family nucleotide-binding domain; Ontology_term=InterPro:IPR000194; score=179.70; evalue=4.70e-53;
MMETSP0851-20130426|191076_1	0.503069	9.14248	14.4351	18.153	14.2068	15.5777	7.34718	13.8854	11.5905	6.06133	33.6552	32.6723	16.3245	14.524	13.946	32.3428	13.3293	73.6785	61.5879	57.9255	27.5484	25.1573	34.4985	35.0486	5.69463	19.5614	19.6743	45.227	36.1973	FALSE	FALSE	FALSE	FALSE
MMETSP0851-20130426|109607_1	0.503069	4.85694	4.12431	2.81684	4.23181	5.32572	4.65321	1.26231	7.34612	10.3909	0.604585	0	3.15958	0	12.1547	10.0315	0.272026	126.948	71.9987	83.916	59.1208	9.54241	52.6141	5.16742	3.52524	4.32411	50.8738	22.7739	45.4207	FALSE	FALSE	FALSE	FALSE
MMETSP0851-20130426|166592_1	0.503069	1.71421	8.79852	1.7214	4.83636	2.796	4.1634	5.89078	10.6111	8.13951	5.44127	0.418876	3.8617	9.00853	3.7104	5.70756	1.63216	11.9375	8.76696	6.08287	1.08337	1.38799	0.787636	2.92072	0	5.14775	5.00588	4.651	1.56623	FALSE	FALSE	FALSE	FALSE
MMETSP0851-20130426|195301_1	0.503069	17.1421	23.0961	16.901	17.3807	23.3	27.307	24.9657	31.6699	14.5472	18.7421	24.2948	15.9734	21.1425	25.3331	24.0409	5.44052	3.72243	6.68481	17.0044	15.941	18.5643	17.0129	18.423	10.0334	31.5042	21.6534	37.6892	22.6233	FALSE	FALSE	FALSE	Name=Pfam:Acyl_transf_3; Dbxref=Pfam:PF01757.17; Description=acyltransferase family; Ontology_term=InterPro:IPR002656; score=58.80; evalue=3.50e-16;
MMETSP0851-20130426|141982_1	0.504066	13.5709	15.1225	11.2674	9.97499	18.2406	20.2047	9.95822	11.2641	6.58088	12.2932	5.86426	14.5692	22.2456	15.2254	16.2579	26.6586	2.5672	1.75339	8.15658	11.4527	19.9523	17.1705	8.98683	11.3893	10.2955	7.68345	8.82087	9.39738	FALSE	FALSE	FALSE	Name=Pfam:Bestrophin; Dbxref=Pfam:PF01062.16; Description=bestrophin rfp-tm chloride channel; Ontology_term=InterPro:IPR021134; score=37.20; evalue=1.40e-09;
MMETSP0851-20130426|193430_1	0.504093	19.2849	30.6574	37.5579	18.5897	36.7475	26.3274	23.0021	22.2016	9.69814	16.1223	55.7105	34.5798	41.3657	24.0536	34.2453	25.0264	161.99	194.955	74.7917	85.5859	44.9361	77.5034	24.4891	24.9479	37.0638	51.4558	70.0858	72.5686	Middle or third domain of peptidase_M16	-	Peptidase_M16,Peptidase_M16_C,Peptidase_M16_M	FALSE
MMETSP0851-20130426|142991_1	0.507563	3.28558	4.67422	7.66807	3.17386	5.59201	4.1634	6.4518	9.95807	5.19543	4.83668	5.86426	1.57979	0.183848	4.8619	8.82077	48.1486	0.513439	5.47935	3.04144	5.72636	9.54241	26.307	6.96479	2.9829	5.55957	1.97907	2.88683	0.696102	Creatine kinase, mitochondrial. Source PGD	-	ATP-gua_Ptrans,ATP-gua_PtransN	Name=Pfam:ATP-gua_PtransN; Dbxref=Pfam:PF02807.10; Description=atp:guanido phosphotransferase n-terminal domain; Ontology_term=InterPro:IPR022413; score=56.40; evalue=2.20e-15;
MMETSP0851-20130426|193539_1	0.507563	42.284	43.5802	34.2716	44.7363	55.5206	26.4498	58.2065	54.5245	53.3397	33.2522	122.312	44.7607	57.5443	25.7169	29.0566	72.631	6.80307	6.68481	24.4697	23.6793	40.0781	51.6689	57.7404	85.4194	82.5699	21.5369	63.5103	18.9688	FALSE	FALSE	FALSE	FALSE
MMETSP0851-20130426|42425_1	0.510051	22.4276	22.2713	15.8056	13.7534	66.9709	19.3476	21.0385	23.8341	52.3007	26.8033	50.0557	41.7766	18.9363	62.565	99.4498	125.132	270.326	323.172	136.726	89.9193	66.1028	163.986	52.7976	74.5725	65.6853	110.246	85.803	97.1062	phosphoglycerate kinase activity	ko:K00927	Gp_dh_C,Gp_dh_N,PGK	Name=Pfam:PGK; Dbxref=Pfam:PF00162.14; Description=phosphoglycerate kinase; Ontology_term=InterPro:IPR001576; score=433.00; evalue=6.40e-130;
MMETSP0851-20130426|83233_1	0.510051	1.99992	3.71188	1.09544	3.325	2.13029	4.77567	3.08564	1.30598	0.865905	3.22445	0.628314	1.05319	1.65463	2.43095	1.72956	2.72026	0.513439	2.95885	1.10598	4.643	4.85795	1.89033	3.8194	1.08469	2.47092	8.14911	0.641518	2.26233	FALSE	FALSE	FALSE	FALSE
MMETSP0851-20130426|195641_1	0.511041	35.4271	30.5199	21.2828	39.7488	25.6966	36.3685	40.9549	72.8082	59.7474	32.043	14.4512	32.4734	50.1904	35.4407	36.8397	209.732	4.87767	7.67109	34.9765	20.1196	91.0866	148.863	32.5772	98.7069	38.5052	44.0052	18.1229	27.8441	oxidoreductase activity	-	Aldo_ket_red	Name=Pfam:Aldo_ket_red; Dbxref=Pfam:PF00248.16; Description=aldo/keto reductase family; Ontology_term=InterPro:IPR023210; score=135.70; evalue=1.20e-39;
MMETSP0851-20130426|90673_1	0.511041	33.9986	32.9945	23.4737	31.1341	33.9515	32.2051	34.0823	31.3434	23.3794	13.7039	42.3065	34.5798	20.0394	24.4374	27.1541	10.337	18.4838	7.45192	31.7968	16.7148	19.9523	10.0817	27.4098	33.0831	36.8579	19.325	22.7739	18.7948	plant-type cell wall cellulose biosynthetic process	-	STELLO	Name=Pfam:DUF288; Dbxref=Pfam:PF03385.12; Description=protein of unknown function duf288; Ontology_term=InterPro:IPR005049; score=70.80; evalue=6.60e-20;
MMETSP0851-20130426|124746_1	0.511041	4.71409	4.53674	5.79017	5.59204	4.92629	4.04095	4.34795	2.12221	8.83223	5.23974	6.91145	0.87766	2.57387	2.55889	3.80504	1.90418	0	0.328761	1.10598	4.79776	3.12297	1.10269	2.47138	1.08469	2.88274	1.28058	3.52835	2.95843	FALSE	FALSE	FALSE	FALSE
MMETSP0851-20130426|194335_1	0.512247	9.57103	17.0471	9.07649	22.0659	16.1103	13.8372	15.288	16.1615	4.15634	10.2779	5.65483	12.4628	9.56008	19.0638	47.563	44.3403	12.836	37.0404	60.414	12.6909	12.8389	12.2871	17.075	8.9487	17.0905	11.0595	34.3212	10.0935	FALSE	FALSE	FALSE	FALSE
MMETSP0851-20130426|24231_1	0.512247	158.279	73.9626	139.121	133.453	164.032	286.54	94.3927	111.335	63.3842	0	160.011	120.064	16.5463	96.0865	117.437	69.6387	112.443	124.82	105.068	13.3099	70.6138	33.7108	81.7801	99.7915	24.5033	43.8888	62.8688	87.1868	FALSE	FALSE	FALSE	Name=Pfam:PCP; Dbxref=Pfam:PF02429.10; Description=peridinin-chlorophyll a binding protein; Ontology_term=InterPro:IPR003376; score=60.40; evalue=1.70e-16;
MMETSP0851-20130426|104624_1	0.512247	3.42843	2.74954	3.12982	1.51136	1.46457	2.69397	1.68308	1.79572	1.03909	13.7039	6.0737	0.351064	9.19238	2.94273	3.11321	1.0881	0	0.438348	0.414741	1.08337	2.08198	1.7328	1.34802	9.49104	4.1182	0.814911	3.20759	1.56623	FALSE	FALSE	FALSE	FALSE
MMETSP0851-20130426|109994_1	0.512247	3.42843	5.22412	3.28631	1.6625	5.45886	1.22453	1.26231	3.42819	7.2736	2.21681	0.209438	0.175532	1.47078	1.66328	4.84277	2.99229	1.9254	1.42463	5.25339	1.54767	0.520495	0	2.24671	0.542345	4.1182	0.116416	1.28304	1.21818	FALSE	FALSE	FALSE	FALSE
MMETSP0851-20130426|129214_1	0.512941	4.99979	1.64972	5.79017	3.02272	3.728	2.81642	4.06744	2.12221	1.03909	5.84432	0	0.175532	4.59619	4.60601	4.66982	0	0.12836	0.438348	1.38247	5.10729	1.73498	4.56829	3.59473	0	0.82364	3.14323	4.97176	1.21818	FALSE	FALSE	FALSE	Name=Pfam:C2; Dbxref=Pfam:PF00168.25; Description=c2 domain; Ontology_term=InterPro:IPR000008; score=33.70; evalue=2.10e-08;
MMETSP0851-20130426|191941_1	0.512941	51.1407	71.488	53.833	60.9079	56.9852	54.2467	60.8713	46.5254	24.7649	40.9103	49.0085	43.3564	39.3434	48.619	50.1573	54.6773	17.4569	12.9313	31.5203	37.763	46.8445	37.1764	44.7095	31.9984	45.9179	35.5069	49.878	34.8051	FALSE	FALSE	FALSE	Name=Pfam:DUF1744; Dbxref=Pfam:PF08490.7; Description=domain of unknown function (duf1744); Ontology_term=InterPro:IPR013697; score=107.80; evalue=4.00e-31;
MMETSP0851-20130426|82199_1	0.513973	0.857107	0.412431	2.19088	0.604545	8.25487	3.67359	1.12205	4.08118	0.346362	0	0	5.09043	11.3986	4.98984	4.49686	2.17621	3.85079	1.42463	1.79721	0.309533	1.04099	0	1.34802	0.542345	2.88274	0	1.28304	0.522077	FALSE	FALSE	FALSE	FALSE
MMETSP0851-20130426|188634_1	0.514055	4.57124	6.46142	6.10316	6.34772	6.92344	6.49001	6.03103	3.59144	8.31269	11.0841	11.3097	9.30319	11.7662	4.35012	8.82077	3.26431	2.31048	1.6438	5.80638	11.7623	6.76643	17.1705	8.76215	3.52524	8.44231	7.68345	6.73594	11.4857	Mitochondrial PGP phosphatase	ko:K01094	PGP_phosphatase	Name=Pfam:PGP_phosphatase; Dbxref=Pfam:PF09419.5; Description=mitochondrial pgp phosphatase; Ontology_term=InterPro:IPR010021; score=144.40; evalue=1.80e-42;
MMETSP0851-20130426|182292_1	0.515867	1.28566	3.71188	2.81684	1.20909	1.864	2.69397	2.80513	4.08118	7.2736	6.65044	3.97932	4.03724	2.75771	3.83834	2.59434	4.08039	3.209	3.3972	15.2072	3.86916	2.60247	5.1984	4.49341	2.44055	6.38321	3.14323	2.88683	2.61038	In Bacillus subtilis this enzyme appears to be involved in 30S ribosomal RNA subunit biogenesis	ko:K06948	MMR_HSR1	FALSE
MMETSP0851-20130426|129484_1	0.515867	7.57111	5.77403	7.98105	3.02272	2.26343	4.1634	4.76872	9.30509	0	9.27031	0.209438	2.45745	6.80236	3.07067	5.5346	15.5055	0.898519	0.438348	1.38247	2.47626	7.11343	15.9102	4.26874	13.0163	8.44231	3.02681	4.97176	2.78441	FALSE	FALSE	FALSE	FALSE
MMETSP0851-20130426|157244_1	0.518178	9.14248	8.38609	12.8323	8.31249	9.05373	7.95944	6.17129	3.1017	0.173181	1.00764	6.70202	7.37234	10.847	4.8619	7.95599	9.24889	1.02688	1.31504	2.62669	4.02393	9.36891	6.30109	6.29078	1.35586	3.91229	3.37606	8.50011	3.82856	FALSE	FALSE	FALSE	FALSE
MMETSP0851-20130426|106607_1	0.52074	12.8566	14.2976	12.0498	12.0909	7.7223	13.3474	12.2023	9.30509	4.32952	9.87489	11.1002	8.42553	11.3986	12.2827	19.717	10.065	7.31651	2.73967	10.2303	4.02393	4.85795	2.52044	7.6388	8.13518	11.1191	5.47155	8.50011	5.39479	FALSE	FALSE	FALSE	FALSE
MMETSP0851-20130426|110988_1	0.52074	22.2848	18.9718	15.0232	16.625	14.7789	11.1432	19.9164	22.2016	8.65905	32.8491	27.2269	12.9894	29.0479	15.6093	13.6635	22.3061	213.334	173.476	110.598	109.575	29.4947	105.386	19.5463	4.88111	16.4728	76.4853	43.1421	97.9764	ribose phosphate diphosphokinase activity	-	Pribosyltran	Name=Pfam:Pribosyltran; Dbxref=Pfam:PF00156.22; Description=phosphoribosyl transferase domain; Ontology_term=InterPro:IPR000836; score=34.30; evalue=1.40e-08;
MMETSP0851-20130426|119653_1	0.52074	28.7131	25.1583	23.0042	30.9829	18.64	36.0012	23.7034	21.8751	11.2568	12.2932	24.7137	18.2553	20.9586	17.7843	23.522	47.6046	7.18815	10.6299	15.2072	26.4651	34.0057	48.0458	12.5816	30.9137	15.0314	19.6743	19.5663	12.1818	signal release from synapse	ko:K15412,ko:K19941	Synapsin,Synapsin_C,Synapsin_N	Name=Pfam:Synapsin_C; Dbxref=Pfam:PF02750.9; Description=synapsin atp binding domain; Ontology_term=InterPro:IPR020898; score=176.60; evalue=2.80e-52;
MMETSP0851-20130426|193300_1	0.52074	12.8566	17.1846	12.9888	9.52158	8.78744	12.2453	19.0749	17.9572	0.346362	23.7804	7.74921	17.2021	11.3986	12.5386	19.0252	155.871	7.31651	7.34233	5.94463	10.8337	64.7149	63.3259	8.76215	15.728	16.2669	14.9012	9.78315	9.74543	FALSE	FALSE	FALSE	FALSE
MMETSP0851-20130426|38107_1	0.521978	34.4271	41.793	29.5768	29.7738	39.2772	57.1855	104.211	136.964	34.9826	48.3668	15.7078	56.8724	31.4379	24.3095	97.8932	38.6277	15.6599	205.037	19.0781	22.5959	42.6806	154.692	137.723	214.498	27.7978	90.3388	32.0759	31.1506	FALSE	FALSE	FALSE	Name=Pfam:LRR_6; Dbxref=Pfam:PF13516.1; Description=leucine rich repeat; score=34.80; evalue=6.20e-09;
MMETSP0851-20130426|98039_1	0.521978	45.2838	39.0435	34.2716	34.6102	38.8778	33.1848	33.2408	37.5468	24.4185	15.3162	31.6251	28.2606	36.4018	34.673	43.0661	57.9416	15.5315	9.64366	22.949	20.4292	50.6615	57.3399	37.52	24.9479	37.4756	27.2413	47.3119	28.5402	FALSE	FALSE	FALSE	Name=Pfam:AAA_6; Dbxref=Pfam:PF12774.2; Description=hydrolytic atp binding site of dynein motor region d1; score=38.40; evalue=8.40e-10;
MMETSP0851-20130426|3666_1	0.523167	1.99992	1.64972	4.22526	4.23181	1.33143	1.22453	1.26231	6.85638	0	11.8902	0	2.45745	3.67695	1.79123	2.24843	19.0418	0.513439	0.767109	0.829483	0.619066	9.8894	24.2592	2.02204	2.16938	1.02955	0.814911	1.12266	0.522077	FALSE	FALSE	FALSE	FALSE
MMETSP0851-20130426|141634_1	0.52605	3.71413	4.67422	8.45052	3.17386	14.1132	30.6132	10.7998	9.30509	14.8936	1.20917	8.58696	6.67021	4.59619	3.83834	5.88051	5.98458	15.6599	15.0134	9.4008	3.09533	5.89894	5.1984	10.1102	0.271173	3.70638	1.74624	4.16987	6.78699	FALSE	FALSE	FALSE	FALSE
MMETSP0851-20130426|2104_1	0.529456	49.5694	32.7195	42.7221	42.0159	25.9629	26.6947	26.789	49.3006	54.552	14.3085	16.1267	38.7926	20.5909	20.727	23.695	36.1795	30.5496	16.986	41.8889	21.6673	24.4633	19.3758	23.1411	36.6083	41.3879	13.155	27.5853	27.8441	glycerophosphodiester phosphodiesterase activity	-	GDPD	Name=Pfam:GDPD; Dbxref=Pfam:PF03009.12; Description=glycerophosphoryl diester phosphodiesterase family; Ontology_term=InterPro:IPR004129; score=42.40; evalue=4.90e-11;
MMETSP0851-20130426|123998_1	0.531255	2.14277	7.1488	5.00772	4.23181	0.932001	3.18378	1.40257	5.8769	2.25135	12.4948	0	2.98404	0.367695	3.19862	0.864781	2.99229	10.5255	3.83554	5.39164	2.16673	1.90848	1.41774	2.24671	0	3.50047	2.9104	1.12266	3.82856	FALSE	FALSE	FALSE	FALSE
MMETSP0851-20130426|73841_1	0.532562	112.138	90.0474	94.8336	100.052	86.0104	128.821	66.2011	93.8671	58.8815	75.1701	49.2179	73.5479	68.2075	48.3631	60.1888	267.13	29.3944	24.3283	42.7184	58.0374	108.61	86.955	57.291	63.4544	74.7453	61.4676	52.4441	51.8596	polyketide synthase	-	ADH_N,ADH_zinc_N,Acyl_transf_1,KAsynt_C_assoc,KR,Ketoacyl-synt_C,PP-binding,PS-DH,ketoacyl-synt	Name=Pfam:ketoacyl-synt; Dbxref=Pfam:PF00109.21; Description=beta-ketoacyl synthase n-terminal domain; Ontology_term=InterPro:IPR014030; score=153.00; evalue=8.70e-45;
MMETSP0851-20130426|118241_1	0.532562	1.28566	3.16197	5.16421	11.4863	1.33143	2.32661	1.40257	0.326494	2.07817	2.21681	0	0.702128	4.78004	0.511779	2.24843	1.36013	0	0.219174	0.414741	1.08337	2.77597	2.20538	2.02204	6.50814	3.29456	0.349248	4.651	0.870128	FALSE	FALSE	FALSE	FALSE
MMETSP0851-20130426|135476_1	0.532562	2.57132	2.19963	10.1719	1.36023	1.46457	3.55114	2.10385	1.14273	1.21227	3.02293	0	2.45745	1.28693	3.7104	2.7673	1.90418	0.898519	0.328761	0.138247	2.63103	3.81696	4.88334	4.94275	8.13518	1.23546	3.49248	1.92455	5.39479	FALSE	FALSE	FALSE	FALSE
MMETSP0851-20130426|11489_1	0.532562	14.1423	15.3974	8.76351	18.4386	12.6486	15.5515	9.11668	8.97859	13.8545	11.0841	15.289	9.47873	8.45699	4.98984	21.4466	25.0264	3.72243	4.05472	7.0506	14.2385	16.1353	11.8145	12.8062	12.4739	8.03049	7.68345	33.0382	7.65712	FALSE	FALSE	FALSE	FALSE
MMETSP0851-20130426|194147_1	0.532599	40.5697	40.6932	35.993	38.2375	35.8155	35.0216	39.1316	29.711	29.9603	35.2675	44.8197	41.25	39.1595	24.3095	38.0504	41.076	11.2957	10.082	18.8016	25.5365	31.5767	27.7248	37.9693	51.794	46.5356	20.2564	36.0854	21.4051	FALSE	FALSE	FALSE	Name=Pfam:Band_7; Dbxref=Pfam:PF01145.20; Description=spfh domain / band 7 family; Ontology_term=InterPro:IPR001107; score=32.20; evalue=8.10e-08;
MMETSP0851-20130426|192911_1	0.532599	14.7137	18.0095	16.7446	17.5318	18.9063	15.9189	14.0257	11.2641	13.5081	12.8978	7.12089	17.9043	5.88312	11.3871	17.4686	20.674	14.7614	30.5748	11.0598	34.6677	20.4728	52.299	12.5816	24.9479	15.4432	40.3963	20.689	24.7116	FALSE	FALSE	FALSE	FALSE
MMETSP0851-20130426|7873_1	0.533127	9.14248	15.5349	7.0421	12.5443	11.7166	7.46963	5.75052	6.36664	2.59771	8.66572	6.0737	10.5319	8.0893	144.322	119.513	19.8579	26.4421	111.888	235.573	7.73833	48.406	26.7796	4.94275	1.62704	7.61867	4.30739	123.011	32.8908	Inositol monophosphatase family	-	Inositol_P	Name=Pfam:Inositol_P; Dbxref=Pfam:PF00459.20; Description=inositol monophosphatase family; Ontology_term=InterPro:IPR000760; score=175.90; evalue=8.90e-52;
MMETSP0851-20130426|186476_1	0.533236	40.284	37.9436	35.993	29.925	30.0903	35.7563	31.9785	36.0776	33.5971	14.7116	21.1532	25.2766	28.1287	26.2287	26.1164	11.4251	26.057	7.23274	31.5203	20.5839	23.9428	14.65	17.749	26.3038	22.856	16.1818	25.1796	20.187	FALSE	FALSE	FALSE	Name=Pfam:SAM_1; Dbxref=Pfam:PF00536.25; Description=sam domain (sterile alpha motif); Ontology_term=InterPro:IPR021129; score=34.90; evalue=1.20e-08;
MMETSP0851-20130426|151778_1	0.534642	16.285	16.9097	11.4239	12.3932	21.7023	17.3883	16.5503	14.0393	15.0667	86.8587	9.21527	12.9894	21.1425	18.2961	16.0849	15.5055	5.13439	5.69852	8.43307	10.3694	20.6463	10.5543	34.5993	3.25407	18.7378	10.5938	77.9444	12.1818	GINS complex protein	ko:K10733	Sld5	Name=Pfam:Sld5; Dbxref=Pfam:PF05916.6; Description=gins complex protein; Ontology_term=InterPro:IPR021151; score=53.30; evalue=2.60e-14;
MMETSP0851-20130426|42226_1	0.535059	9.71388	14.4351	19.5614	14.6602	161.636	30.8582	16.6905	72.9715	63.3842	216.038	355.626	115.5	86.0407	182.961	79.5599	110.987	601.622	307.392	189.813	286.473	180.091	129.487	91.8903	122.299	77.628	179.63	136.643	138.872	Belongs to the universal ribosomal protein uS13 family	ko:K02964	Ribosomal_S13	Name=Pfam:Ribosomal_S13; Dbxref=Pfam:PF00416.17; Description=ribosomal protein s13/s18; Ontology_term=InterPro:IPR001892; score=93.50; evalue=8.90e-27;
MMETSP0851-20130426|10616_1	0.535059	6.1426	11.2731	13.4582	11.1841	7.18972	7.34718	7.29334	3.75468	3.6368	12.0917	11.1002	7.19681	8.82469	9.97969	14.5283	6.52863	9.11355	18.0819	5.66813	26.4651	12.1449	21.2662	2.92072	10.3046	9.47186	26.0772	16.0379	19.6649	MOZ/SAS family	ko:K11308	MOZ_SAS,Tudor-knot	Name=Pfam:MOZ_SAS; Dbxref=Pfam:PF01853.13; Description=moz/sas family; Ontology_term=InterPro:IPR002717; score=242.80; evalue=1.30e-72;
MMETSP0851-20130426|174717_1	0.535059	23.2847	23.646	26.9165	15.2648	11.3172	19.47	17.2516	33.9554	35.8485	28.617	25.7609	13.1649	18.9363	15.6093	19.717	120.236	4.87767	2.30133	15.8984	14.2385	50.3145	66.634	65.8285	10.8469	25.9446	18.1609	26.623	8.35322	FALSE	FALSE	FALSE	FALSE
MMETSP0851-20130426|672_1	0.535059	15.4279	14.8475	151.014	23.4261	87.6081	85.1048	60.8713	186.591	405.763	214.225	107.232	255.926	132.37	22.9021	61.7454	178.177	314.738	47.6703	83.5012	43.1799	19.9523	35.2861	78.6347	1194.52	40.1524	29.104	83.3973	54.9921	FALSE	FALSE	FALSE	FALSE
MMETSP0851-20130426|12530_1	0.539392	22.4276	30.1075	25.821	20.7057	34.484	22.8987	32.259	38.1998	7.2736	32.043	143.674	17.5532	30.5187	28.0199	43.0661	69.9107	62.8963	14.1367	52.1192	29.4056	28.1067	24.1017	33.0266	11.6604	24.9151	23.2832	38.3307	21.7532	-	-	-	FALSE
MMETSP0851-20130426|168213_1	0.539392	1.71421	4.39926	5.00772	3.62727	4.26058	2.81642	4.06744	7.34612	9.87132	13.9055	2.51326	3.15958	0.919238	3.32656	5.70756	0.544052	9.24191	1.86298	16.7279	8.20263	5.37845	0.315054	3.14539	0	1.44137	2.32832	0.962277	1.91428	FALSE	FALSE	FALSE	FALSE
MMETSP0851-20130426|193106_1	0.539392	14.2851	16.3598	9.54596	11.6375	20.1046	9.06152	14.7269	13.223	2.94408	9.06878	22.8287	15.9734	16.5463	8.18846	11.761	1.0881	4.10751	1.86298	2.48845	8.97646	15.2678	5.82851	14.1542	10.0334	14.8255	4.54022	14.2738	10.2675	FALSE	FALSE	FALSE	FALSE
MMETSP0851-20130426|46684_1	0.54217	12.7138	14.2976	11.5803	12.6954	7.85544	12.7351	7.85437	6.52989	7.44678	8.46419	3.35101	8.95213	13.237	12.1547	11.5881	11.6971	17.4569	108.162	7.88008	10.2146	7.98092	5.04087	7.6388	6.50814	8.64822	4.77305	8.33973	8.8753	cell redox homeostasis	ko:K01829,ko:K09583,ko:K13984	Thioredoxin	Name=Pfam:Thioredoxin; Dbxref=Pfam:PF00085.15; Description=thioredoxin; Ontology_term=InterPro:IPR013766; score=31.90; evalue=7.00e-08;
MMETSP0851-20130426|1582_1	0.54217	120.995	83.586	147.884	131.942	97.0613	139.229	163.679	255.482	225.135	4.63515	160.848	153.239	88.6146	157.372	135.944	40.8039	153.39	36.9308	148.477	87.2883	107.395	71.5173	94.137	87.0464	84.8349	77.533	59.3404	109.114	FALSE	FALSE	FALSE	FALSE
MMETSP0851-20130426|57646_1	0.545565	4.14268	1.7872	6.10316	4.38295	3.19543	3.9185	2.52462	1.79572	1.21227	2.21681	7.95864	0.87766	9.37623	1.53534	5.36164	23.3942	1.79704	11.6162	3.17968	10.2146	8.67491	14.1774	2.69605	0.271173	1.23546	6.86854	2.72645	13.922	FALSE	FALSE	FALSE	FALSE
MMETSP0851-20130426|9214_1	0.546614	16.1422	15.2599	14.8667	13.4511	12.116	10.1636	12.3426	18.2837	21.6476	13.9055	22.2004	21.2394	19.8555	16.121	16.0849	7.61673	19.7674	16.5476	10.2303	8.51216	14.0534	3.78065	13.0309	27.9308	21.2087	12.4565	9.94353	6.96102	GDSL-like Lipase/Acylhydrolase	-	Lipase_GDSL_2	Name=Pfam:Lipase_GDSL_2; Dbxref=Pfam:PF13472.1; Description=gdsl-like lipase/acylhydrolase family; score=73.50; evalue=2.00e-20;
MMETSP0851-20130426|6171_1	0.546614	10.4281	17.872	16.7446	16.625	17.9743	15.0617	13.4646	15.3452	11.6031	27.6094	36.0233	17.2021	30.5187	33.7774	27.846	71.5429	85.7443	206.133	96.773	41.0131	52.917	68.6819	27.6345	15.1857	25.9446	60.0706	57.897	59.1687	Peptide methionine sulfoxide reductase	ko:K02214,ko:K07304,ko:K14442,ko:K16914	PMSR	Name=Pfam:PMSR; Dbxref=Pfam:PF01625.16; Description=peptide methionine sulfoxide reductase; Ontology_term=InterPro:IPR002569; score=125.40; evalue=1.60e-36;
MMETSP0851-20130426|99216_1	0.546614	8.85677	9.21096	7.19859	5.13863	11.9829	6.12265	8.27514	17.7939	5.88815	3.82904	4.60764	8.07447	7.7216	4.8619	12.9717	3.53634	10.9106	8.21902	9.26256	3.7144	5.37845	5.04087	6.51545	3.52524	5.55957	5.1223	4.81138	5.56882	FALSE	FALSE	FALSE	FALSE
MMETSP0851-20130426|25620_1	0.547235	5.8569	4.26179	2.97333	8.01022	0.532572	6.61246	0.841539	2.12221	6.23452	2.8214	0	5.79255	0	1.66328	1.90252	0	2.69556	0.219174	1.52072	0	1.04099	0	0.449341	2.44055	1.85319	0.349248	0	0.696102	FALSE	FALSE	FALSE	FALSE
MMETSP0851-20130426|131647_1	0.547722	3.28558	2.61206	2.19088	4.98749	1.73086	1.59189	3.08564	1.95897	4.32952	0.201528	0	1.22872	3.67695	3.07067	0.172956	0	0.12836	0.109587	0.138247	0.4643	1.56148	1.89033	4.26874	7.32166	0	1.74624	4.651	0.522077	FALSE	FALSE	FALSE	FALSE
MMETSP0851-20130426|41875_1	0.547722	4.14268	2.33711	1.09544	2.41818	0.665715	3.67359	3.92718	3.26494	0	0	1.46607	4.21277	5.51543	2.94273	3.80504	1.0881	5.51947	4.16431	6.35937	0.773833	2.60247	0	8.98683	1.08469	3.91229	1.51341	0	2.08831	FALSE	FALSE	FALSE	FALSE
MMETSP0851-20130426|38016_1	0.547722	9.14248	3.43692	3.12982	2.41818	3.99429	3.67359	2.94539	5.8769	1.73181	0.806114	0.418876	5.44149	7.17006	13.4342	7.26416	0	0.12836	0.328761	2.21195	4.02393	6.59293	3.4656	14.3789	0.271173	7.61867	2.44473	11.5473	5.91687	FALSE	FALSE	FALSE	FALSE
MMETSP0851-20130426|163938_1	0.5502	5.14264	7.97366	17.3705	5.59204	3.86115	4.53076	7.15308	1.30598	0.519543	4.03057	2.51326	5.44149	0.183848	3.19862	2.94026	0	10.0121	1.31504	5.80638	1.70243	3.46997	5.98603	1.34802	0	1.44137	3.37606	2.08493	2.26233	FALSE	FALSE	FALSE	FALSE
MMETSP0851-20130426|191071_1	0.550773	7.71396	10.0358	6.41614	5.28977	18.64	5.14303	4.76872	5.38716	3.6368	88.0679	4.3982	2.45745	10.2955	30.067	39.2611	31.011	452.468	510.347	146.957	203.363	140.707	183.362	7.41413	4.33876	9.06004	147.033	82.5954	173.851	Belongs to the actin-binding proteins ADF family	ko:K05765	Cofilin_ADF	Name=Pfam:Cofilin_ADF; Dbxref=Pfam:PF00241.15; Description=cofilin/tropomyosin-type actin-binding protein; Ontology_term=InterPro:IPR002108; score=117.40; evalue=3.30e-34;
MMETSP0851-20130426|4149_1	0.550773	24.8561	22.1338	21.1263	18.2875	21.8355	14.0821	16.41	10.2846	23.0331	27.0048	16.1267	19.8351	16.5463	19.8314	19.5441	6.2566	52.2424	90.8476	35.253	29.2509	27.0657	20.4785	11.6829	27.9308	24.2974	33.5278	24.6984	28.3662	FALSE	FALSE	FALSE	FALSE
MMETSP0851-20130426|177599_1	0.550773	30.8559	42.2054	27.2295	28.5647	26.2292	22.5313	29.4539	25.3033	10.9104	13.5024	19.4777	18.0798	18.5686	21.4947	19.5441	25.2984	7.18815	7.01357	15.0689	20.8935	16.8293	16.3828	16.1763	10.3046	18.7378	18.8594	37.208	20.8831	FALSE	FALSE	FALSE	FALSE
MMETSP0851-20130426|152313_1	0.550773	8.42822	3.98683	6.88561	5.13863	4.79315	4.89812	13.0439	9.79483	0.173181	7.45655	0.209438	7.37234	11.3986	17.5284	4.49686	11.6971	1.15524	3.94513	3.73267	6.03589	9.19541	5.1984	7.6388	11.9316	2.88274	6.05363	44.7459	7.83115	FALSE	FALSE	FALSE	FALSE
MMETSP0851-20130426|22283_1	0.551319	2.57132	3.5744	1.09544	1.96477	2.13029	0.489812	1.68308	1.30598	1.21227	4.03057	2.72269	2.28192	0.551543	3.19862	26.1164	6.2566	12.9643	3.50678	20.1841	2.63103	9.36891	8.97905	0.224671	0.271173	4.1182	1.51341	4.00949	1.74026	FALSE	FALSE	FALSE	FALSE
MMETSP0851-20130426|13544_1	0.552529	22.8562	17.597	14.0842	26.4488	14.1132	32.6949	12.7633	5.38716	5.88815	2.21681	16.9645	12.6383	2.39002	6.52518	6.22642	1.36013	13.7345	4.27389	6.63586	5.41683	6.24594	3.30807	8.98683	13.2875	4.73593	5.23872	8.33973	4.35064	FALSE	FALSE	FALSE	FALSE
MMETSP0851-20130426|42246_1	0.553874	8.71392	7.83619	10.4849	7.40567	5.85829	6.85737	5.18949	5.06066	0.346362	1.4107	4.81707	3.68617	9.37623	14.0739	9.16668	4.89647	10.5255	71.6699	11.3363	4.1787	5.03145	3.30807	13.2556	8.9487	7.61867	5.58796	6.73594	4.17661	FALSE	FALSE	FALSE	FALSE
MMETSP0851-20130426|102505_1	0.553874	8.99962	3.5744	6.41614	7.70794	5.32572	6.2451	1.26231	4.24443	2.59771	126.56	0	0.702128	2.75771	1.79123	1.72956	1.0881	0.641799	1.86298	0.276494	1.8572	1.56148	0.945163	3.59473	0.271173	4.32411	4.07456	4.97176	2.26233	FALSE	FALSE	FALSE	FALSE
MMETSP0851-20130426|148904_1	0.553874	37.1413	52.9286	29.8898	54.1067	45.5349	33.1848	48.3885	43.2605	21.3013	37.6858	34.9761	39.8458	27.761	33.7774	40.8177	56.3094	11.424	7.01357	29.8614	34.8225	40.9456	37.3339	36.3966	32.5407	55.3898	30.7338	41.6987	35.1532	FALSE	FALSE	FALSE	Name=Pfam:Ank_2; Dbxref=Pfam:PF12796.2; Description=ankyrin repeats (3 copies); Ontology_term=InterPro:IPR020683; score=55.80; evalue=3.80e-15;
MMETSP0851-20130426|39332_1	0.553874	12.5709	8.24862	10.6414	8.61476	7.45601	7.95944	3.08564	3.42819	0.173181	0	0	6.31915	5.14773	3.07067	5.70756	0.272026	5.13439	1.53422	2.21195	0.4643	0.867491	0.945163	2.02204	4.06759	5.76548	2.44473	0.320759	0.696102	FALSE	FALSE	FALSE	Name=Pfam:DnaJ; Dbxref=Pfam:PF00226.26; Description=dnaj domain; Ontology_term=InterPro:IPR001623; score=46.80; evalue=1.60e-12;
MMETSP0851-20130426|14414_1	0.554164	11.7138	13.3353	8.60701	7.85908	9.71944	9.55133	7.4336	10.1213	4.32952	8.86725	10.4719	10.0053	9.00853	10.4915	17.9874	13.6013	2.43884	0.986283	4.9769	9.44076	14.9209	11.1844	11.4582	13.0163	9.06004	3.84173	8.17935	6.78699	FALSE	FALSE	FALSE	FALSE
MMETSP0851-20130426|2102_1	0.554461	4.99979	3.16197	3.91228	4.23181	1.59772	4.65321	3.92718	0.652989	0.173181	2.61987	0	5.26596	0.183848	3.58245	1.21069	0.816078	0	0.767109	0.829483	3.7144	2.25548	0.945163	2.92072	0.813518	2.0591	3.25965	2.72645	2.26233	FALSE	FALSE	FALSE	FALSE
MMETSP0851-20130426|173874_1	0.555878	8.14252	9.89834	3.28631	9.97499	5.72515	9.18397	4.06744	5.38716	5.19543	14.107	0	5.09043	3.12541	7.80463	4.49686	21.4901	2.18212	1.53422	3.31793	4.643	10.9304	14.8076	7.41413	9.49104	5.55957	5.47155	10.7454	7.83115	FALSE	FALSE	FALSE	FALSE
MMETSP0851-20130426|61975_1	0.561231	13.5709	20.8965	15.8056	18.892	16.776	11.3881	8.83616	12.57	20.6085	5.44127	20.5249	15.0957	15.627	12.6665	10.5503	22.0341	21.1794	76.7109	21.843	75.3713	27.2392	68.0518	8.98683	15.728	17.7083	89.8731	16.8398	59.8648	FALSE	FALSE	FALSE	Name=Pfam:bZIP_1; Dbxref=Pfam:PF00170.16; Description=bzip transcription factor; Ontology_term=InterPro:IPR004827; score=34.40; evalue=1.40e-08;
MMETSP0851-20130426|188349_1	0.562023	2.99987	4.67422	3.91228	5.28977	5.32572	5.87774	4.06744	6.04014	1.73181	1.20917	4.18876	0.702128	1.83848	3.45451	3.63208	8.43281	0.12836	0.547935	1.52072	3.7144	1.90848	0.630109	5.61677	1.35586	3.91229	5.8208	5.13214	2.95843	FALSE	FALSE	FALSE	Name=Pfam:MAPEG; Dbxref=Pfam:PF01124.13; Description=mapeg family; Ontology_term=InterPro:IPR001129; score=48.80; evalue=4.30e-13;
MMETSP0851-20130426|120758_1	0.562023	2.71417	3.84935	0.156491	3.17386	2.66286	3.06132	1.26231	1.14273	0.346362	5.44127	0.628314	0.702128	0	2.94273	4.49686	9.79294	0	0	0.96773	1.08337	5.55194	4.09571	5.16742	6.23697	2.0591	2.09549	4.33025	0.870128	FALSE	FALSE	FALSE	FALSE
MMETSP0851-20130426|50493_1	0.563044	6.57115	1.92468	8.29403	2.87159	1.06514	16.8985	3.08564	1.30598	0	0.201528	5.02651	2.45745	1.65463	3.32656	3.63208	0.544052	2.5672	0.547935	1.52072	0.619066	1.04099	0	0.449341	0	1.23546	0.465664	0	0.348051	FALSE	FALSE	FALSE	FALSE
MMETSP0851-20130426|42507_1	0.563044	25.4275	18.4219	27.386	25.9954	13.3143	12.0004	17.2516	17.6307	19.7426	31.4384	6.49258	10.0053	9.19238	8.5723	8.3019	20.1299	0.25672	3.06844	7.46534	10.8337	12.4919	7.87636	13.7049	23.3209	16.4728	5.70438	11.0662	6.09089	FALSE	FALSE	FALSE	FALSE
MMETSP0851-20130426|75363_1	0.563044	17.5707	24.8833	15.4926	18.5897	17.0423	10.2861	17.9528	17.9572	24.4185	11.0841	20.7344	18.6064	12.6855	19.9594	18.1604	5.1685	5.90455	6.35605	8.70957	14.3933	11.9714	21.1086	20.8944	25.4902	25.9446	16.8803	15.5568	9.5714	FALSE	FALSE	FALSE	Name=Pfam:Ank_2; Dbxref=Pfam:PF12796.2; Description=ankyrin repeats (3 copies); Ontology_term=InterPro:IPR020683; score=122.10; evalue=7.90e-36;
MMETSP0851-20130426|12458_1	0.563044	1.99992	2.61206	3.12982	1.20909	3.59486	1.95925	2.66487	7.67262	1.73181	3.42598	0	0.175532	5.51543	2.30301	1.90252	39.4438	0	0.109587	1.10598	0.619066	9.54241	5.82851	3.14539	0.271173	0.61773	1.51341	1.44342	2.08831	FALSE	FALSE	FALSE	FALSE
MMETSP0851-20130426|192373_1	0.563044	42.284	47.4295	34.2716	45.6431	34.7503	38.0829	44.3211	38.6896	20.7817	22.9742	19.6872	37.9149	27.2094	29.0435	28.0189	31.555	11.424	10.6299	16.4514	24.2983	35.7406	25.5194	32.5772	14.6433	33.9751	19.6743	34.8023	21.0571	FALSE	FALSE	FALSE	Name=Pfam:efhand; Dbxref=Pfam:PF00036.27; Description=ef hand; Ontology_term=InterPro:IPR002048; score=43.70; evalue=6.30e-12;
MMETSP0851-20130426|164651_1	0.563044	5.8569	5.08665	7.66807	3.92954	5.72515	3.9185	5.61026	2.61195	5.02225	11.4871	15.289	3.33511	2.75771	3.32656	3.80504	2.72026	5.39111	0.547935	4.83865	2.63103	1.38799	2.99302	7.41413	14.9145	7.00094	1.74624	0.962277	1.91428	FALSE	FALSE	FALSE	FALSE
MMETSP0851-20130426|151922_1	0.563649	38.2841	33.1319	28.9509	27.9602	22.2349	55.4712	33.8018	23.9973	23.2063	72.1472	26.5986	25.6277	36.218	29.9391	24.0409	39.9878	31.8332	57.6428	25.4375	59.1208	43.2011	76.0856	49.8769	26.3038	26.3565	58.3244	71.6896	73.9608	Acyl-coenzyme A oxidase N-terminal	ko:K00232	ACOX,Acyl-CoA_dh_M,Acyl-CoA_ox_N	Name=Pfam:ACOX; Dbxref=Pfam:PF01756.14; Description=acyl-coa oxidase; Ontology_term=InterPro:IPR002655; score=135.60; evalue=1.10e-39;
MMETSP0851-20130426|134958_1	0.563649	11.1424	13.6102	11.2674	10.8818	9.98573	17.021	13.3244	14.0393	5.88815	4.03057	0	7.19681	11.0309	26.4846	12.9717	19.8579	68.9292	11.945	38.1562	11.1432	23.5958	41.4297	7.41413	12.7451	11.325	20.9549	10.9058	27.8441	ATPase activity	-	ABC_tran,ABC_tran_Xtn	Name=Pfam:ABC_tran; Dbxref=Pfam:PF00005.22; Description=abc transporter; Ontology_term=InterPro:IPR003439; score=58.00; evalue=1.00e-15;
MMETSP0851-20130426|1753_1	0.563649	3.28558	6.73637	0.938947	3.7784	4.26058	0.734718	5.18949	1.14273	4.32952	5.03821	6.49258	4.21277	0.735391	1.02356	1.38365	0.272026	0	0	0.829483	1.54767	2.25548	1.10269	3.37006	9.49104	4.32411	1.97907	4.97176	1.91428	FALSE	FALSE	FALSE	FALSE
MMETSP0851-20130426|180582_1	0.563649	2.71417	3.43692	1.40842	2.72045	0.133143	0.612265	0.981796	3.75468	4.50271	1.61223	1.04719	1.22872	4.78004	2.30301	1.55661	2.17621	3.08064	1.31504	3.17968	1.08337	0.867491	1.26022	8.08814	0.271173	3.08865	1.28058	0.320759	0.696102	FALSE	FALSE	FALSE	FALSE
MMETSP0851-20130426|74459_1	0.56487	4.14268	8.79852	7.0421	3.7784	1.73086	3.9185	1.12205	1.30598	5.36861	3.42598	0.418876	0.702128	0.919238	9.97969	4.84277	11.4251	0	0	3.31793	6.19066	6.24594	5.1984	4.94275	3.25407	2.26501	3.95814	16.3587	1.74026	FALSE	FALSE	FALSE	Name=Pfam:zf-RING_2; Dbxref=Pfam:PF13639.1; Description=ring finger domain; Ontology_term=InterPro:IPR001841; score=26.60; evalue=3.30e-06;
MMETSP0851-20130426|193148_1	0.565334	3.28558	4.26179	2.97333	4.68522	2.796	2.81642	2.24411	4.89741	22.5135	4.03057	0.628314	4.9149	0.919238	4.47807	2.7673	1.90418	0.513439	2.73967	1.24422	3.86916	3.64346	4.72582	1.12335	13.2875	4.73593	5.47155	2.72645	2.61038	-	-	-	FALSE
MMETSP0851-20130426|132674_1	0.565334	14.8565	14.5726	9.07649	13.9045	19.1726	14.2045	8.97642	10.6111	3.6368	13.5024	14.0323	9.30319	18.3848	9.85174	14.3554	16.3216	13.2211	4.93141	14.2395	6.50019	11.6244	7.40378	16.8503	17.8974	17.2964	3.60889	5.77366	7.83115	carboxy-lyase activity. It is involved in the biological process described with carboxylic acid metabolic process	ko:K01634,ko:K20704	Pyridoxal_deC	FALSE
MMETSP0851-20130426|146717_1	0.566182	3.85698	4.81169	4.85123	2.26704	4.39372	2.93887	2.94539	4.08118	0.346362	4.03057	0	3.68617	1.65463	3.07067	10.5503	24.7544	14.5047	0.986283	8.01833	2.3215	5.20495	3.62313	0.674012	9.21987	5.55957	2.79398	0.962277	4.69869	FALSE	FALSE	FALSE	Name=Pfam:WW; Dbxref=Pfam:PF00397.21; Description=ww domain; Ontology_term=InterPro:IPR001202; score=39.60; evalue=2.90e-10;
MMETSP0851-20130426|135374_1	0.566182	6.1426	6.46142	11.1109	9.37044	7.98858	9.55133	4.76872	7.50937	2.42453	14.107	0.418876	1.40426	6.43467	7.1649	6.91825	3.80837	0.770159	3.17802	2.21195	4.33346	3.81696	3.30807	3.8194	0.542345	5.97139	3.49248	6.2548	6.61297	FALSE	FALSE	FALSE	FALSE
MMETSP0851-20130426|158854_1	0.566239	2.28562	3.98683	1.40842	4.08068	3.86115	2.0817	1.26231	2.61195	0.865905	0.403057	1.04719	3.15958	0.183848	1.79123	2.94026	11.9692	1.02688	5.15059	0.829483	1.70243	2.60247	9.2941	1.79737	2.16938	9.06004	3.84173	3.84911	4.00259	FALSE	FALSE	FALSE	FALSE
MMETSP0851-20130426|189727_1	0.567045	24.7133	30.2449	12.5193	24.4841	28.7589	20.5721	15.288	9.79483	13.3349	52.5989	24.5042	17.0266	28.8641	12.7945	25.2516	16.8656	50.8305	21.4791	17.5574	14.0838	13.0124	16.0678	27.1851	1.08469	18.1201	11.6416	24.6984	16.0103	Nucleotide-diphospho-sugar transferase	-	Nucleotid_trans	Name=Pfam:Nucleotid_trans; Dbxref=Pfam:PF03407.11; Description=nucleotide-diphospho-sugar transferase; Ontology_term=InterPro:IPR005069; score=87.50; evalue=8.90e-25;
MMETSP0851-20130426|147693_1	0.567045	6.28545	9.21096	7.0421	8.61476	12.2492	6.36755	11.0803	7.34612	10.7372	7.05349	11.3097	4.73936	15.4432	6.0134	13.1447	6.80065	7.82995	4.27389	11.3363	4.79776	4.68445	3.93818	6.06611	6.50814	8.85413	3.84173	3.20759	8.35322	FALSE	FALSE	FALSE	FALSE
MMETSP0851-20130426|12496_1	0.567955	19.8563	25.5707	20.5003	24.3329	23.5663	19.2251	16.2698	22.2016	10.7372	16.9284	6.49258	22.8192	21.694	21.4947	19.0252	32.6431	32.9885	119.888	20.1841	12.8456	19.2583	19.5334	15.7269	20.6091	15.0314	16.5311	16.5191	15.6623	FALSE	FALSE	FALSE	FALSE
MMETSP0851-20130426|193851_1	0.567955	41.8554	53.3411	47.8863	42.6204	38.212	43.2259	45.0224	47.3417	27.8821	43.7317	22.6193	42.8298	76.2968	34.5451	40.4718	50.8689	13.9912	15.9997	34.7	35.4415	46.324	35.4436	34.1499	49.3534	52.507	44.5873	43.1421	40.5479	FALSE	FALSE	FALSE	Name=Pfam:HNOB; Dbxref=Pfam:PF07700.10; Description=heme no binding; Ontology_term=InterPro:IPR011644; score=108.60; evalue=2.00e-31;
MMETSP0851-20130426|148548_1	0.567955	2.28562	3.29945	8.13754	4.98749	3.46172	2.44906	3.2259	15.5085	0.692724	0.201528	4.60764	2.28192	4.78004	2.55889	9.8585	110.987	1.66868	1.20546	1.93546	0.773833	47.8855	47.1006	2.69605	7.59284	2.67683	1.51341	3.20759	1.21818	FALSE	FALSE	FALSE	FALSE
MMETSP0851-20130426|167082_1	0.57061	1.57136	8.38609	3.44281	4.53408	4.52686	1.10208	4.90898	4.24443	2.94408	5.84432	0.837752	1.93085	1.28693	3.32656	2.94026	5.44052	0.12836	0	2.48845	3.2501	2.42898	4.09571	4.94275	6.50814	3.50047	5.8208	13.4719	1.74026	flagellar protein FlaG	ko:K06603	FlaG	Name=Pfam:FlaG; Dbxref=Pfam:PF03646.10; Description=flag protein; Ontology_term=InterPro:IPR005186; score=80.30; evalue=9.10e-23;
MMETSP0851-20130426|46131_1	0.57061	19.8563	31.4822	28.4814	25.6931	14.6457	19.3476	24.4046	24.3238	15.0667	3.62751	11.5191	14.3936	8.0893	10.2356	8.64781	1.63216	5.13439	5.80811	3.87092	6.80973	19.7788	3.30807	28.5332	5.69463	11.7369	7.3342	42.8213	15.6623	Required for the assembly and or stability of the 40S ribosomal subunit. Required for the processing of the 20S rRNA- precursor to mature 18S rRNA in a late step of the maturation of 40S ribosomal subunits	ko:K02998	Ribosomal_S2	Name=Pfam:Ribosomal_S2; Dbxref=Pfam:PF00318.15; Description=ribosomal protein s2; Ontology_term=InterPro:IPR001865; score=45.80; evalue=3.70e-12;
MMETSP0851-20130426|193141_1	0.57061	34.1414	30.6574	23.7867	32.0409	26.2292	35.144	27.2098	18.6102	20.9549	12.4948	17.1739	22.8192	24.6356	38.8952	55.173	18.2258	12.836	31.4515	78.9391	12.5361	22.7283	15.5952	26.0618	21.965	23.6796	21.3041	41.5383	28.1921	FALSE	FALSE	FALSE	FALSE
MMETSP0851-20130426|118047_1	0.57061	1.42851	2.33711	3.12982	2.26704	1.33143	4.65321	0.981796	1.95897	0	1.00764	0.209438	3.51064	2.20617	3.83834	3.11321	8.16078	22.463	40.6568	0.829483	1.8572	5.03145	4.72582	1.57269	0	1.44137	1.86265	0.160379	2.08831	FALSE	FALSE	FALSE	Name=Pfam:HEAT_2; Dbxref=Pfam:PF13646.1; Description=heat repeats; score=28.70; evalue=1.10e-06;
MMETSP0851-20130426|190053_1	0.57061	36.7128	38.2186	42.4091	39.1443	56.7189	31.4704	28.8929	32.4862	18.184	51.3897	30.7874	21.9415	26.4741	43.3733	45.6604	31.8271	102.559	96.8749	113.916	67.0139	61.4184	96.4066	26.2865	30.9137	47.5652	65.0765	46.3497	61.7791	FALSE	FALSE	FALSE	FALSE
MMETSP0851-20130426|190320_1	0.57061	51.2836	58.1527	49.2947	49.7238	53.9229	44.6953	42.3575	46.6887	27.5358	56.0249	41.0498	38.0904	58.2797	60.7737	56.5567	53.3171	375.452	120.765	157.325	231.685	64.8884	157.527	48.0795	37.1507	60.3316	86.9627	146.426	237.023	FALSE	FALSE	FALSE	FALSE
MMETSP0851-20130426|4999_1	0.57061	29.9987	34.2318	27.386	30.6806	22.1017	43.7157	30.4357	21.3854	39.1389	6.85197	14.2418	27.2075	25.5548	32.6259	28.8837	11.4251	22.0779	13.26	36.2207	17.3338	15.2678	9.45163	27.8592	73.4878	33.3574	20.0235	11.7077	20.361	FALSE	FALSE	FALSE	FALSE
MMETSP0851-20130426|165262_1	0.571417	6.85686	8.52357	7.66807	6.64999	5.19258	7.22473	4.90898	8.97859	7.2736	9.27031	3.56045	2.28192	5.33158	5.24573	6.74529	9.52092	0.641799	2.63009	1.52072	2.47626	5.72544	10.5543	3.8194	0.813518	9.06004	1.04774	3.52835	1.91428	FALSE	FALSE	FALSE	FALSE
MMETSP0851-20130426|10593_1	0.571417	14.9994	27.2204	15.4926	16.4738	15.844	13.2249	17.3918	27.4255	13.1618	32.6476	16.9645	23.8723	28.8641	16.249	13.1447	29.3788	38.2512	47.3416	13.5482	12.8456	23.0753	13.8624	22.4671	31.456	16.8846	17.4624	13.953	16.3584	FALSE	FALSE	FALSE	Name=Pfam:Methyltransf_25; Dbxref=Pfam:PF13649.1; Description=methyltransferase domain; score=47.00; evalue=2.30e-12;
MMETSP0851-20130426|189403_1	0.572387	32.4272	26.5331	23.0042	23.275	20.504	41.634	24.8254	15.9982	16.9717	26.1987	10.4719	19.133	13.6047	14.0739	16.9497	19.8579	38.6363	21.4791	16.3132	19.8101	20.9933	18.1156	28.5332	13.5586	26.1506	13.0386	17.9625	13.0519	FALSE	FALSE	FALSE	Name=Pfam:TerC; Dbxref=Pfam:PF03741.11; Description=integral membrane protein terc family; Ontology_term=InterPro:IPR005496; score=126.20; evalue=8.60e-37;
MMETSP0851-20130426|168227_1	0.576752	11.9995	14.8475	10.7979	16.1716	7.58915	14.0821	8.97642	28.2418	44.5075	13.5024	3.14157	14.0426	4.59619	11.0032	19.5441	5.1685	15.7883	18.4106	26.1287	7.42879	13.8799	7.56131	22.0177	14.101	9.88368	10.7103	9.78315	10.9636	ATP binding	ko:K06184	ABC_tran,ABC_tran_Xtn	Name=Pfam:ABC_tran; Dbxref=Pfam:PF00005.22; Description=abc transporter; Ontology_term=InterPro:IPR003439; score=45.10; evalue=9.90e-12;
MMETSP0851-20130426|128153_1	0.576752	18.285	41.3806	31.9242	26.6	33.8183	30.2459	25.8072	19.9161	19.5695	74.1624	36.0233	29.4894	41.7334	33.6495	27.846	77.5275	20.7943	25.5338	25.4375	46.2752	37.8226	61.2781	20.8944	14.3722	30.2688	53.3185	48.2742	30.6285	FAD binding domain	ko:K09838	FAD_binding_3	Name=Pfam:FAD_binding_3; Dbxref=Pfam:PF01494.14; Description=fad binding domain; Ontology_term=InterPro:IPR002938; score=69.90; evalue=1.80e-19;
MMETSP0851-20130426|38133_1	0.576752	23.7133	28.7327	25.3516	26.2977	21.1697	15.3066	18.3736	23.3443	21.1281	31.0354	23.6665	14.5692	11.0309	13.0504	20.4088	20.946	20.6659	37.3692	16.0367	45.5014	18.7378	80.6539	22.0177	15.728	34.5929	60.4199	31.7551	33.2389	Lycopene cyclase protein	ko:K06443	Lycopene_cycl	Name=Pfam:Lycopene_cycl; Dbxref=Pfam:PF05834.7; Description=lycopene cyclase protein; Ontology_term=InterPro:IPR008671; score=204.90; evalue=1.60e-60;
MMETSP0851-20130426|5393_1	0.576752	32.9986	38.0811	51.7986	44.1318	50.1949	27.9193	34.3629	44.0767	29.0944	48.1653	29.3213	21.9415	40.4465	78.3022	147.705	90.8567	135.933	133.806	246.495	55.0969	235.611	84.4346	37.7447	20.8803	33.5633	58.4408	125.417	106.156	Serine aminopeptidase, S33	-	Hydrolase_4	Name=Pfam:Abhydrolase_6; Dbxref=Pfam:PF12697.2; Description=alpha/beta hydrolase family; score=63.20; evalue=2.80e-17;
MMETSP0851-20130426|149946_1	0.576752	8.57107	6.18646	7.98105	8.61476	6.65715	10.531	9.6777	9.46833	2.42453	23.7804	4.18876	4.73936	3.67695	12.0268	16.4308	7.61673	16.4301	12.0546	29.1701	5.26206	15.7883	6.61614	7.41413	9.76222	18.5319	8.26553	24.2173	8.70128	FALSE	FALSE	FALSE	FALSE
MMETSP0851-20130426|105451_1	0.576752	4.99979	5.22412	6.57263	3.325	7.7223	0.612265	2.24411	2.93845	0.173181	0.403057	12.1474	5.09043	6.25082	8.82819	2.94026	3.80837	24.7734	34.0816	7.3271	2.01196	0.867491	3.93818	8.31281	2.71173	2.26501	3.37606	3.36797	13.0519	FALSE	FALSE	FALSE	FALSE
MMETSP0851-20130426|6394_1	0.576752	15.5708	9.48591	8.92	9.52158	9.5863	12.8576	9.39719	8.81534	6.23452	5.84432	22.8287	16.6755	12.5016	7.93257	3.97799	10.881	0.898519	1.86298	4.14741	8.82169	16.6558	5.35592	12.3569	9.21987	3.91229	3.49248	7.85859	2.26233	FALSE	FALSE	FALSE	FALSE
MMETSP0851-20130426|167729_1	0.576752	2.42847	2.33711	3.75579	2.41818	2.92915	1.71434	1.54282	2.12221	9.87132	8.06114	2.93213	1.93085	8.45699	5.11779	0.864781	3.26431	0	1.20546	0.414741	1.23813	3.12297	0.157527	2.92072	1.08469	1.85319	1.16416	2.56607	1.91428	FALSE	FALSE	FALSE	FALSE
MMETSP0851-20130426|189599_1	0.576752	24.7133	14.71	18.153	20.2522	10.252	18.0006	20.1969	21.3854	6.92724	1.4107	24.0854	16.3245	19.4878	11.1312	13.8365	5.1685	19.3823	7.01357	20.1841	7.42879	14.9209	1.7328	19.5463	7.32166	4.94184	5.35513	13.7926	13.2259	FALSE	FALSE	FALSE	FALSE
MMETSP0851-20130426|144992_1	0.576752	28.4274	27.7703	21.9088	36.8772	26.6286	24.858	20.4775	22.8546	19.5695	17.936	16.3362	24.3989	6.80236	19.8314	14.8742	12.7852	5.00603	6.02728	15.3454	9.90506	16.4823	19.5334	18.423	16.2704	25.121	19.325	27.7456	27.148	FALSE	FALSE	FALSE	Name=Pfam:FMO-like; Dbxref=Pfam:PF00743.14; Description=flavin-binding monooxygenase-like; Ontology_term=InterPro:IPR020946; score=60.00; evalue=1.10e-16;
MMETSP0851-20130426|22539_1	0.576752	23.7133	12.3729	16.7446	19.95	3.46172	24.7355	19.6359	22.6914	20.089	0.201528	11.938	10.883	6.80236	6.52518	13.1447	17.1376	52.1141	1.97257	8.98606	6.19066	29.8417	0.787636	9.2115	1.35586	23.4737	5.58796	8.50011	13.748	FALSE	FALSE	FALSE	FALSE
MMETSP0851-20130426|119840_1	0.576752	18.1421	21.9963	20.1874	13.4511	14.6457	28.7764	18.2334	29.058	8.83223	17.533	29.3213	24.5745	14.3401	22.5183	12.1069	49.2367	2.69556	4.05472	12.0275	9.28599	31.7502	43.32	8.76215	18.4397	19.3555	8.0327	17.0002	10.6156	FALSE	FALSE	FALSE	FALSE
MMETSP0851-20130426|12880_1	0.576752	3.99983	2.74954	0.312982	3.92954	2.39657	2.57151	1.82334	5.71365	5.02225	1.4107	0.628314	3.33511	1.10309	3.19862	2.94026	0.272026	13.3494	9.20531	3.04144	3.40486	0.867491	4.56829	9.2115	5.69463	3.91229	1.04774	4.00949	3.65454	FALSE	FALSE	FALSE	FALSE
MMETSP0851-20130426|192056_1	0.576752	20.8563	38.906	30.6723	34.3079	27.2943	22.4089	34.2226	29.2212	16.9717	22.7727	32.2535	42.3032	47.4327	26.4846	35.2831	72.359	11.424	22.027	23.7785	28.1675	29.6682	29.3001	27.6345	30.1002	27.5919	23.9817	60.7838	28.3662	FALSE	FALSE	FALSE	Name=Pfam:VWA; Dbxref=Pfam:PF00092.23; Description=von willebrand factor type a domain; Ontology_term=InterPro:IPR002035; score=61.90; evalue=5.50e-17;
MMETSP0851-20130426|37993_1	0.577369	28.4274	25.7082	27.6989	23.7284	19.4389	46.5321	25.2462	44.7297	8.83223	9.06878	12.3568	16.3245	32.9087	13.6901	27.3271	123.772	8.98519	3.83554	13.6865	13.6195	57.0809	98.9271	13.2556	27.9308	16.2669	15.5997	16.1983	15.6623	FALSE	FALSE	FALSE	FALSE
MMETSP0851-20130426|100929_1	0.579582	16.8564	14.71	13.3017	10.8818	11.5834	11.5106	14.8672	7.99911	12.8154	13.9055	8.37752	13.6915	96.3362	6.0134	14.7013	3.26431	2.5672	4.16431	6.63586	7.11926	24.6368	25.8345	11.2335	4.33876	5.14775	3.49248	14.2738	6.43894	FALSE	FALSE	FALSE	FALSE
MMETSP0851-20130426|10075_1	0.580801	22.5705	31.0698	20.1874	26.7511	30.3566	24.1232	33.2408	42.4443	31.6921	27.0048	132.784	44.9362	70.0459	20.4712	19.1981	15.5055	3.97915	11.1779	19.3546	24.9174	31.4032	14.335	61.7844	44.4723	65.0675	24.5638	23.4154	25.2337	Retinal pigment epithelial membrane protein	-	RPE65	Name=Pfam:RPE65; Dbxref=Pfam:PF03055.10; Description=retinal pigment epithelial membrane protein; Ontology_term=InterPro:IPR004294; score=226.40; evalue=4.70e-67;
MMETSP0851-20130426|137087_1	0.580801	3.99983	5.77403	4.38175	3.92954	2.92915	1.71434	2.52462	3.59144	11.0836	1.61223	3.14157	4.03724	1.65463	5.88546	2.7673	19.0418	0.513439	3.3972	3.45618	2.63103	7.80742	8.19141	4.94275	5.69463	5.97139	2.44473	10.585	4.87271	FALSE	FALSE	FALSE	FALSE
MMETSP0851-20130426|192386_1	0.580801	26.856	32.857	26.447	35.0636	42.6058	27.0621	35.4849	44.4032	34.463	71.7441	14.4512	32.4734	32.7249	24.3095	25.0787	100.922	12.0658	7.45192	18.6634	21.5125	44.4156	48.991	22.6917	19.5244	31.0924	19.7907	39.9345	23.1454	FALSE	FALSE	FALSE	Name=Pfam:Sugar_tr; Dbxref=Pfam:PF00083.19; Description=sugar (and other) transporter; Ontology_term=InterPro:IPR005828; score=245.10; evalue=9.50e-73;
MMETSP0851-20130426|51801_1	0.580801	10.9995	10.3108	9.54596	9.97499	11.9829	6.36755	7.15308	10.9376	7.2736	13.9055	4.60764	7.19681	6.80236	8.06052	15.5661	21.218	1.9254	0.876696	5.11514	5.10729	13.8799	20.1635	4.71808	1.08469	14.2078	8.26553	5.93404	8.35322	FALSE	FALSE	FALSE	Name=Pfam:TPT; Dbxref=Pfam:PF03151.11; Description=triose-phosphate transporter family; Ontology_term=InterPro:IPR004853; score=70.80; evalue=8.40e-20;
MMETSP0851-20130426|141997_1	0.580886	1.99992	3.16197	7.0421	4.53408	3.06229	2.81642	3.50641	3.75468	1.21227	0.201528	8.37752	7.54787	0	3.07067	1.38365	2.17621	0.385079	0.328761	0.829483	2.3215	0.693993	2.99302	1.12335	9.49104	3.29456	2.2119	6.57556	2.26233	FALSE	FALSE	FALSE	FALSE
MMETSP0851-20130426|151773_1	0.582723	1.57136	2.19963	0.469474	3.47613	12.116	1.83679	1.12205	19.9161	21.8208	1.81376	0	22.117	0.735391	0.255889	0.691825	3.26431	0.385079	3.06844	0.414741	0.773833	2.77597	2.04785	7.18946	14.3722	22.2383	1.28058	10.9058	1.91428	FALSE	FALSE	FALSE	FALSE
MMETSP0851-20130426|20180_1	0.584037	18.8564	20.3466	25.3516	26.4488	6.65715	38.3278	20.8982	19.7529	34.463	0	11.3097	11.5851	3.67695	9.33997	19.0252	7.07268	0.25672	2.41091	3.59442	2.3215	69.7463	7.40378	26.7358	0	10.0896	1.74624	4.00949	14.0961	methionine adenosyltransferase activity	ko:K00789	S-AdoMet_synt_C,S-AdoMet_synt_M,S-AdoMet_synt_N	Name=Pfam:S-AdoMet_synt_M; Dbxref=Pfam:PF02772.11; Description=s-adenosylmethionine synthetase central domain; Ontology_term=InterPro:IPR022629; score=65.80; evalue=2.90e-18;
MMETSP0851-20130426|84414_1	0.584819	21.142	13.7477	14.3972	19.3454	21.1697	20.2047	16.2698	19.2632	20.7817	50.5836	6.91145	19.133	11.9501	14.9695	14.7013	19.0418	89.9802	95.3407	37.7415	37.4535	49.447	46.6281	15.0529	9.76222	22.0324	41.2112	27.1041	32.0207	-	-	-	FALSE
MMETSP0851-20130426|183091_1	0.584819	8.85677	5.77403	6.72912	14.3579	6.65715	12.0004	12.2023	8.3256	4.50271	22.5712	10.4719	8.7766	12.8693	11.1312	12.9717	19.5859	17.5853	23.342	9.6773	6.19066	10.5834	11.0269	9.66084	8.40635	6.38321	6.63571	4.16987	5.39479	Diacylglycerol acyltransferase	-	Abhydrolase_1,DAGAT,Hydrolase_4	FALSE
MMETSP0851-20130426|7185_1	0.584819	52.8549	32.0321	49.6077	42.9227	33.6852	36.3685	44.1808	41.9545	82.0878	10.4795	20.7344	41.9521	22.7971	48.4911	34.9372	13.6013	32.6034	16.7668	49.4925	20.5839	23.7693	15.2801	26.7358	41.4894	35.6224	32.48	19.4059	26.6259	Possible plasma membrane-binding motif in junctophilins, PIP-5-kinases and protein kinases.	-	MORN	Name=Pfam:MORN; Dbxref=Pfam:PF02493.15; Description=morn repeat; Ontology_term=InterPro:IPR003409; score=67.30; evalue=3.10e-19;
MMETSP0851-20130426|12917_1	0.584819	14.1423	18.2844	10.1719	13.6023	12.7817	8.3268	10.0985	19.2632	1.38545	21.362	9.21527	19.133	10.1116	11.3871	47.563	19.0418	36.5825	41.7526	91.6578	14.2385	28.9742	17.9581	12.5816	30.3713	14.4137	8.61478	54.2083	26.1038	Si dkey-18a10.3	ko:K09414	HSF_DNA-bind	Name=Pfam:HSF_DNA-bind; Dbxref=Pfam:PF00447.12; Description=hsf-type dna-binding; Ontology_term=InterPro:IPR000232; score=91.70; evalue=2.50e-26;
MMETSP0851-20130426|126627_1	0.584819	30.1416	28.5952	25.3516	22.3682	22.6343	19.3476	27.2098	12.7333	23.899	25.191	22.6193	7.37234	20.4071	22.5183	21.9654	24.7544	49.4185	132.272	21.0136	22.2864	26.3717	12.7597	17.749	14.101	23.6796	24.0981	24.3777	20.361	FALSE	FALSE	FALSE	Name=Pfam:Cu-oxidase_2; Dbxref=Pfam:PF07731.9; Description=multicopper oxidase; Ontology_term=InterPro:IPR011706; score=38.00; evalue=9.40e-10;
MMETSP0851-20130426|190913_1	0.584819	36.9985	36.7063	35.8365	35.2147	44.2035	31.7153	38.7108	32.1597	34.8094	20.5559	19.2683	33	41.1819	41.8379	36.6667	16.0495	11.5524	11.1779	21.1518	25.6912	32.4442	24.1017	41.7887	39.32	31.7101	28.0562	33.1986	22.4493	FALSE	FALSE	FALSE	FALSE
MMETSP0851-20130426|136685_1	0.584819	4.28554	3.5744	5.16421	7.55681	6.25772	2.57151	4.48821	5.06066	0	4.83668	0	11.0585	4.78004	3.07067	3.97799	0	0.25672	5.15059	0.96773	2.94056	4.33746	3.78065	2.47138	0	2.88274	3.49248	5.93404	2.26233	FALSE	FALSE	FALSE	FALSE
MMETSP0851-20130426|111272_1	0.584819	14.428	10.5857	8.76351	18.1363	11.9829	18.123	17.8126	10.6111	7.61996	7.05349	12.3568	15.0957	8.82469	9.33997	7.61007	0.544052	11.2957	3.28761	12.0275	10.8337	6.76643	3.15054	13.2556	8.67753	20.3851	5.70438	7.85859	6.09089	FALSE	FALSE	FALSE	FALSE
MMETSP0851-20130426|166195_1	0.58544	7.71396	8.38609	2.97333	6.04545	4.26058	4.1634	5.61026	5.71365	2.7709	6.44891	3.14157	7.89894	5.33158	5.50162	6.57234	5.71255	1.66868	2.41091	0.96773	3.7144	4.85795	3.15054	6.51545	2.9829	6.1773	3.25965	4.81138	4.00259	FALSE	FALSE	FALSE	FALSE
MMETSP0851-20130426|14082_1	0.585645	16.8564	14.8475	11.4239	22.5193	6.92344	12.7351	10.6595	32.9759	2.25135	4.2321	5.86426	9.30319	5.51543	12.1547	19.1981	62.294	4.23587	3.3972	11.0598	6.50019	69.7463	164.458	9.66084	5.15228	30.2688	5.35513	15.7172	7.13505	FALSE	FALSE	FALSE	FALSE
MMETSP0851-20130426|125250_1	0.585645	5.28549	4.81169	3.91228	4.68522	4.92629	6.49001	1.54282	9.46833	0	1.61223	0.628314	1.75532	1.83848	4.47807	4.32391	3.53634	0	0.547935	1.52072	3.55963	2.25548	3.78065	3.37006	0.542345	2.67683	5.58796	4.81138	2.43636	FALSE	FALSE	FALSE	FALSE
MMETSP0851-20130426|75866_1	0.586624	13.2852	9.07348	11.4239	13.9045	13.8469	7.59208	12.2023	6.52989	9.69814	18.5406	3.97932	4.3883	2.20617	18.424	45.1416	19.3139	7.31651	21.6982	52.2574	5.57159	12.8389	10.3968	12.8062	7.05049	10.5014	5.23872	30.1513	9.91945	FALSE	FALSE	FALSE	FALSE
MMETSP0851-20130426|186375_1	0.586624	23.5704	17.597	10.4849	19.3454	13.1812	20.817	21.7398	13.0598	15.5863	11.8902	20.7344	16.3245	18.2009	18.8079	24.2139	7.88876	7.70159	4.71224	7.3271	13.4647	28.1067	13.2323	14.6036	6.77932	26.1506	16.1818	21.0097	13.574	FALSE	FALSE	FALSE	FALSE
MMETSP0851-20130426|103682_1	0.588122	26.5703	22.2713	27.073	24.3329	42.4726	17.8781	24.4046	16.488	16.6254	28.214	24.7137	13.867	21.8779	16.3769	31.9969	28.8348	51.9857	77.9164	39.1239	32.6557	25.5042	24.5742	27.1851	14.9145	37.4756	30.0353	30.1513	24.8856	FALSE	FALSE	FALSE	FALSE
MMETSP0851-20130426|19369_1	0.588122	1.14281	1.7872	0.625965	3.7784	5.32572	1.34698	6.03103	1.95897	2.59771	1.81376	5.23595	0.175532	0	2.30301	1.72956	1.0881	0	0.328761	0.414741	1.70243	1.56148	3.15054	0.674012	1.62704	4.94184	0.58208	1.76417	1.21818	FALSE	FALSE	FALSE	FALSE
MMETSP0851-20130426|863_1	0.588219	14.7137	5.77403	11.2674	11.4863	4.92629	6.73491	3.64667	4.73417	0	0	1.46607	0.702128	0.919238	1.79123	3.28617	0.272026	0	2.63009	0.138247	0.154767	1.04099	0.315054	1.34802	1.89821	2.47092	0.465664	4.81138	0.870128	Geranylgeranyl diphosphate reductase	ko:K10960	FAD_binding_3,Pyr_redox_2	FALSE
MMETSP0851-20130426|74262_1	0.588219	8.99962	10.5857	8.13754	11.9398	9.45315	10.0411	5.75052	10.2846	2.7709	9.27031	13.404	3.8617	8.64084	7.1649	11.761	6.2566	0.513439	1.6438	6.22112	5.57159	16.8293	12.4446	9.66084	9.21987	9.26595	8.96403	4.651	7.4831	Protein of unknown function (DUF1499)	-	DUF1499	Name=Pfam:DUF1499; Dbxref=Pfam:PF07386.6; Description=protein of unknown function (duf1499); Ontology_term=InterPro:IPR010865; score=57.40; evalue=1.30e-15;
MMETSP0851-20130426|76287_1	0.588219	6.1426	2.61206	5.16421	2.26704	1.46457	2.57151	3.64667	0.979483	7.10042	13.9055	1.04719	2.80851	0.367695	1.1515	44.2768	19.3139	2.43884	5.36976	1.65897	8.82169	3.29647	37.4915	4.26874	0	3.70638	8.96403	3.20759	10.6156	FALSE	FALSE	FALSE	FALSE
MMETSP0851-20130426|111497_1	0.588602	53.712	59.5275	57.7452	45.6431	73.8944	54.8589	43.3393	50.7699	37.5803	39.4996	37.6988	40.0213	32.541	56.4236	73.8523	44.8843	18.8689	16.2189	29.4466	35.4415	63.1534	29.3001	104.472	59.9292	39.5347	31.0831	245.862	31.3246	Belongs to the peptidase C1 family	ko:K16292	Granulin,Inhibitor_I29,Peptidase_C1	Name=Pfam:Peptidase_C1; Dbxref=Pfam:PF00112.18; Description=papain family cysteine protease; Ontology_term=InterPro:IPR000668; score=248.80; evalue=4.90e-74;
MMETSP0851-20130426|3773_1	0.588602	13.5709	9.89834	10.9544	19.0432	8.52115	11.3881	10.379	12.8965	4.67589	16.1223	21.1532	15.7979	12.5016	11.1312	17.2956	67.4625	20.2808	88.8751	10.092	7.73833	7.46043	6.77367	15.7269	0.542345	12.7664	3.37606	8.33973	8.8753	Glutathione S-transferase, C-terminal domain	ko:K07393	GST_C_2,GST_N_2	Name=Pfam:GST_N_2; Dbxref=Pfam:PF13409.1; Description=glutathione s-transferase n-terminal domain; score=63.50; evalue=1.20e-17;
MMETSP0851-20130426|144176_1	0.588602	1.57136	1.51225	4.06877	1.20909	2.66286	1.71434	0.701283	5.71365	4.84907	6.44891	9.84359	0.175532	0.367695	1.66328	2.24843	0.816078	0	1.42463	0.414741	1.54767	0.346997	2.99302	3.59473	3.25407	5.55957	2.56115	0.962277	1.04415	FALSE	FALSE	FALSE	FALSE
MMETSP0851-20130426|194614_1	0.588602	5.8569	6.87385	7.51158	11.3352	7.58915	4.65321	10.379	9.14184	5.19543	6.04585	1.88494	3.51064	8.82469	3.19862	7.43712	10.609	1.79704	1.97257	1.79721	2.16673	7.63392	8.19141	9.2115	12.2028	5.35366	2.9104	10.4247	3.30648	FALSE	FALSE	FALSE	FALSE
MMETSP0851-20130426|195457_1	0.588602	25.1418	33.9568	22.6912	29.1693	27.2943	32.6949	27.6305	24.1606	15.2399	15.5177	7.12089	19.484	15.2594	15.2254	13.8365	12.5132	37.3527	43.0677	18.5251	19.5006	18.2173	8.82152	12.5816	44.4723	22.6501	19.0922	22.2927	10.7896	FALSE	FALSE	FALSE	FALSE
MMETSP0851-20130426|135422_1	0.588602	2.57132	6.87385	0.938947	4.53408	4.92629	1.34698	7.4336	3.75468	1.21227	0.201528	0.837752	0.87766	0	2.55889	12.2799	12.7852	0.12836	0.219174	1.24422	3.09533	5.20495	1.7328	6.29078	1.08469	6.38321	3.02681	3.52835	2.26233	FALSE	FALSE	FALSE	FALSE
MMETSP0851-20130426|146072_1	0.58901	60.1403	42.0679	39.7488	45.1897	77.7555	41.2667	43.6198	98.2748	50.9152	98.1443	42.7253	37.3883	36.9534	74.4638	56.2108	234.759	12.9643	7.89026	37.7415	28.1675	73.9103	155.637	37.0707	41.2182	41.7997	42.8411	29.8306	45.5947	-	-	Glyco_hydro_72	Name=Pfam:Glyco_hydro_2_C; Dbxref=Pfam:PF02836.12; Description=glycosyl hydrolases family 2 tim barrel domain; Ontology_term=InterPro:IPR006103; score=37.10; evalue=1.40e-09;
MMETSP0851-20130426|188849_1	0.59056	21.9991	32.4446	25.9775	23.7284	27.028	26.6947	37.4485	30.5272	47.6248	40.1041	24.9231	15.6223	32.3572	23.4139	25.4246	27.2026	20.1525	32.2186	24.608	43.3346	27.4127	47.7307	28.3085	36.8795	39.9465	52.9692	40.4156	55.5141	Belongs to the class-I aminoacyl-tRNA synthetase family	-	tRNA-synt_1c,tRNA-synt_1c_C	Name=Pfam:tRNA-synt_1c; Dbxref=Pfam:PF00749.16; Description=trna synthetases class i (e and q) catalytic domain; Ontology_term=InterPro:IPR020058; score=197.00; evalue=2.50e-58;
MMETSP0851-20130426|132463_1	0.590994	0.428554	4.26179	5.3207	2.26704	5.85829	2.20415	2.10385	13.5495	2.07817	0.403057	1.6755	5.96809	4.59619	1.40739	2.59434	1.90418	0.25672	0.109587	1.93546	1.23813	11.7979	6.9312	27.6345	0	0.82364	0.58208	55.9724	3.82856	FALSE	FALSE	FALSE	FALSE
MMETSP0851-20130426|126891_1	0.592903	8.57107	4.53674	8.92	7.25454	7.05658	3.79604	7.4336	7.83586	16.6254	0.604585	1.04719	6.84575	4.78004	4.22218	6.91825	59.3017	1.02688	1.75339	3.59442	2.7858	21.5138	5.82851	6.51545	14.9145	13.5901	3.72531	5.77366	6.78699	FALSE	FALSE	FALSE	Name=Pfam:Pkinase; Dbxref=Pfam:PF00069.20; Description=protein kinase domain; Ontology_term=InterPro:IPR000719; score=56.50; evalue=2.00e-15;
MMETSP0851-20130426|191585_1	0.592962	63.2831	85.2357	59.4666	73.301	85.0784	53.6344	69.5673	57.463	59.0547	120.514	63.4597	56.6968	56.2574	51.3058	91.6668	113.979	146.844	51.0675	140.874	67.1687	64.5414	104.283	51.6742	21.965	80.099	76.136	119.803	109.81	FALSE	FALSE	FALSE	FALSE
MMETSP0851-20130426|195268_1	0.592962	19.7135	19.7967	30.9853	17.3807	13.3143	11.2657	11.7816	17.3042	12.9886	10.2779	17.3834	19.8351	12.6855	20.2153	43.9309	16.5936	14.2479	56.2181	47.6952	12.3813	14.2269	15.2801	17.2996	31.1849	15.4432	10.9431	26.623	19.4909	FALSE	FALSE	FALSE	Name=Pfam:LRR_4; Dbxref=Pfam:PF12799.2; Description=leucine rich repeats (2 copies); Ontology_term=InterPro:IPR025875; score=55.60; evalue=2.40e-15;
MMETSP0851-20130426|62388_1	0.592962	1.57136	2.88702	3.44281	5.4409	2.39657	3.55114	5.61026	5.06066	5.36861	3.42598	1.46607	1.22872	1.28693	2.94273	2.24843	3.53634	0	0	0.96773	3.55963	0.173498	1.10269	2.92072	0	6.79503	4.30739	7.53784	1.04415	FALSE	FALSE	FALSE	FALSE
MMETSP0851-20130426|142645_1	0.592962	1.42851	1.92468	6.10316	4.08068	2.26343	1.10208	3.2259	2.28546	1.38545	1.4107	0	0.526596	5.14773	1.27945	1.21069	0	2.05376	7.01357	4.42391	1.08337	0.693993	0	2.92072	0	11.9428	0.814911	1.12266	0	FALSE	FALSE	FALSE	FALSE
MMETSP0851-20130426|127462_1	0.592962	11.9995	11.9605	3.12982	8.01022	3.32858	7.10227	5.47001	7.01963	1.55863	2.21681	1.6755	6.49468	3.30926	4.22218	4.49686	13.3293	1.15524	0.657522	3.31793	7.73833	8.50142	7.24625	5.3921	0	6.38321	8.49836	5.61328	6.96102	FALSE	FALSE	FALSE	FALSE
MMETSP0851-20130426|1608_2	0.593841	123.423	41.6555	74.4898	97.634	11.9829	16.8985	36.8875	18.1204	54.8984	1.61223	3.56045	5.61702	12.6855	18.8079	11.2422	19.5859	1.15524	10.082	8.43307	7.58356	7.28693	20.4785	22.0177	21.965	28.2097	18.3937	8.82087	13.748	Glyceraldehyde-3-phosphate dehydrogenase	ko:K00134	Gp_dh_C,Gp_dh_N	Name=Pfam:Gp_dh_C; Dbxref=Pfam:PF02800.15; Description=glyceraldehyde 3-phosphate dehydrogenase c-terminal domain; Ontology_term=InterPro:IPR020829; score=173.30; evalue=2.20e-51;
MMETSP0851-20130426|173303_1	0.593841	46.8552	74.7875	53.0505	67.2556	63.2429	40.1646	53.9988	42.1178	31.3458	83.4328	110.374	37.9149	32.1733	90.4569	205.126	102.01	268.144	251.612	394.834	123.504	146.259	260.392	53.921	42.0318	66.7148	201.516	263.824	138.176	Glutamate/Leucine/Phenylalanine/Valine dehydrogenase	ko:K15371	ELFV_dehydrog	Name=Pfam:ELFV_dehydrog; Dbxref=Pfam:PF00208.16; Description=glutamate/leucine/phenylalanine/valine dehydrogenase; Ontology_term=InterPro:IPR006096; score=121.30; evalue=4.10e-35;
MMETSP0851-20130426|76467_1	0.593841	17.5707	29.5575	18.153	21.9147	20.504	14.327	12.4828	29.2212	14.5472	21.5635	10.8908	10.7074	27.761	15.2254	69.1825	62.294	49.2902	36.9308	18.9399	18.7267	21.5138	14.8076	19.9957	27.9308	12.5605	18.3937	26.4626	19.1428	One of several proteins that assist in the late maturation steps of the functional core of the 30S ribosomal subunit. Helps release RbfA from mature subunits. May play a role in the assembly of ribosomal proteins into the subunit. Circularly permuted GTPase that catalyzes slow GTP hydrolysis, GTPase activity is stimulated by the 30S ribosomal subunit	ko:K06949	RsgA_GTPase	Name=Pfam:DUF258; Dbxref=Pfam:PF03193.11; Description=protein of unknown function duf258; Ontology_term=InterPro:IPR004881; score=125.30; evalue=1.10e-36;
MMETSP0851-20130426|90224_1	0.593841	38.5698	43.3052	41.6267	45.492	40.2092	47.5118	40.1134	43.0972	29.2676	35.6705	45.8669	32.1223	51.845	29.4273	29.5755	18.4978	11.424	11.6162	21.2901	20.7387	41.8131	31.978	31.0045	47.4552	34.181	21.8862	33.3589	26.4519	FALSE	FALSE	FALSE	Name=Pfam:Ion_trans; Dbxref=Pfam:PF00520.26; Description=ion transport protein; Ontology_term=InterPro:IPR005821; score=69.00; evalue=2.80e-19;
MMETSP0851-20130426|167529_1	0.593841	19.7135	12.9228	26.447	24.3329	14.2463	29.5112	10.0985	8.6521	9.52495	9.67336	8.7964	9.82979	6.98621	4.73395	7.61007	2.44824	3.46571	1.53422	3.73267	8.66692	9.36891	5.1984	7.6388	6.77932	12.3546	9.42969	10.585	9.22335	FALSE	FALSE	FALSE	Name=Pfam:Glycos_transf_2; Dbxref=Pfam:PF00535.21; Description=glycosyl transferase family 2; Ontology_term=InterPro:IPR001173; score=34.50; evalue=1.40e-08;
MMETSP0851-20130426|81008_1	0.593841	1.57136	3.71188	2.50386	3.92954	0.399429	4.28585	1.54282	6.20339	9.00541	2.01528	5.44539	4.03724	0.183848	1.53534	1.21069	0	3.72243	0	4.42391	0.928599	0.520495	1.10269	3.14539	0	2.67683	0.814911	2.56607	0.696102	FALSE	FALSE	FALSE	FALSE
MMETSP0851-20130426|178012_1	0.593841	52.5692	39.5934	47.7298	43.3761	41.6738	50.6955	37.4485	25.4666	13.5081	35.0659	26.8081	38.7926	36.0341	33.0097	35.2831	26.9306	8.08667	5.15059	25.9905	24.7626	53.0905	53.7168	26.2865	23.592	37.0638	25.4951	30.4721	18.9688	FALSE	FALSE	FALSE	Name=Pfam:GOLD_2; Dbxref=Pfam:PF13897.1; Description=golgi-dynamics membrane-trafficking; Ontology_term=InterPro:IPR009038; score=32.10; evalue=1.00e-07;
MMETSP0851-20130426|137828_1	0.594154	55.5691	70.5257	54.7719	62.5704	69.5007	60.8591	68.7257	73.298	50.0493	41.7164	30.7874	57.2234	38.9757	61.9252	64.1668	48.4207	144.533	79.4506	78.2479	78.6214	65.2354	65.5313	66.5025	31.7272	70.833	99.3028	66.3971	83.8803	FALSE	FALSE	FALSE	FALSE
MMETSP0851-20130426|166888_1	0.594154	2.99987	7.28628	6.72912	6.34772	3.32858	3.55114	3.92718	3.91793	1.90499	6.04585	6.49258	2.63298	4.2285	4.60601	3.45912	1.36013	0.25672	2.63009	1.93546	1.70243	4.85795	1.57527	5.84144	1.62704	4.53002	4.54022	6.73594	2.61038	FALSE	FALSE	FALSE	Name=Pfam:EF_hand_5; Dbxref=Pfam:PF13499.1; Description=ef-hand domain pair; Ontology_term=InterPro:IPR011992; score=38.40; evalue=9.20e-10;
MMETSP0851-20130426|7086_1	0.594437	18.5707	20.8965	8.45052	20.8568	15.3114	12.3678	10.0985	19.7529	17.6645	6.24738	17.8022	19.133	18.0171	11.7709	18.8522	13.3293	3.08064	12.8217	12.4422	14.2385	13.1859	17.9581	19.097	5.69463	17.7083	19.4415	31.9155	10.0935	NADH pyrophosphatase activity	ko:K01519	Ham1p_like	Name=Pfam:APH; Dbxref=Pfam:PF01636.18; Description=phosphotransferase enzyme family; Ontology_term=InterPro:IPR002575; score=63.20; evalue=2.60e-17;
MMETSP0851-20130426|188725_1	0.594437	48.998	61.5897	83.2533	58.3386	89.0727	45.0627	73.9152	94.6833	63.7306	212.209	104.091	68.4575	163.441	68.1945	108.098	264.137	239.519	54.136	221.61	42.7156	211.321	221.798	129.41	103.317	118.192	63.9123	85.1615	105.982	FALSE	FALSE	FALSE	Name=Pfam:PT; Dbxref=Pfam:PF04886.7; Description=pt repeat; Ontology_term=InterPro:IPR006970; score=42.20; evalue=3.30e-11;
MMETSP0851-20130426|191456_1	0.594437	50.2836	40.4182	57.7452	40.9579	9.5863	25.5927	16.41	48.3212	24.7649	16.3238	11.5191	15.2713	10.6632	25.8448	30.0944	8.97686	46.8513	3.3972	38.5709	26.3103	19.9523	5.98603	6.96479	15.4568	16.061	32.1308	18.7644	22.4493	FALSE	FALSE	FALSE	Name=Pfam:Bac_DNA_binding; Dbxref=Pfam:PF00216.16; Description=bacterial dna-binding protein; Ontology_term=InterPro:IPR000119; score=30.40; evalue=2.70e-07;
MMETSP0851-20130426|166766_1	0.595121	7.99967	10.9982	13.1453	8.01022	19.8383	6.61246	6.03103	10.2846	12.2958	9.06878	6.28314	7.19681	10.847	19.8314	14.0095	11.4251	35.1706	24.5475	14.5159	15.3219	15.0944	7.87636	10.1102	3.79642	12.7664	12.2237	8.17935	19.3168	FALSE	FALSE	FALSE	FALSE
MMETSP0851-20130426|113908_1	0.595677	38.427	34.5067	19.2484	36.8772	27.6937	33.6746	33.6616	25.3033	21.8208	42.1194	19.0589	8.25	26.8418	27.1243	23.695	14.4174	11.8091	6.46563	19.7693	21.9768	26.8922	32.1355	41.7887	39.8624	36.0342	22.9339	127.662	23.6675	-	-	-	Name=Pfam:Abhydrolase_5; Dbxref=Pfam:PF12695.2; Description=alpha/beta hydrolase family; score=36.30; evalue=3.80e-09;
MMETSP0851-20130426|192608_1	0.59607	33.9986	42.8928	36.1495	35.0636	32.0875	52.2874	29.5941	32.6494	20.4354	28.214	63.6691	45.9894	21.5102	19.0638	15.5661	16.8656	12.1942	7.5615	18.1104	22.5959	69.2258	65.0587	39.0927	27.3884	26.3565	16.4146	25.5003	19.6649	FALSE	FALSE	FALSE	Name=Pfam:efhand; Dbxref=Pfam:PF00036.27; Description=ef hand; Ontology_term=InterPro:IPR002048; score=97.90; evalue=2.90e-29;
MMETSP0851-20130426|7012_1	0.59607	4.14268	2.88702	2.81684	4.23181	3.59486	1.71434	2.94539	1.14273	2.59771	2.8214	1.46607	4.56383	0.367695	3.32656	2.07547	0.544052	4.36423	1.09587	3.59442	0.773833	2.25548	0.787636	5.61677	0.813518	1.64728	0.465664	2.24531	2.43636	FALSE	FALSE	FALSE	FALSE
MMETSP0851-20130426|140265_1	0.59607	2.71417	7.42375	4.85123	4.23181	3.59486	4.28585	2.80513	1.30598	2.07817	9.27031	3.97932	2.63298	0	0.767668	3.28617	5.98458	7.82995	10.082	4.42391	0.928599	3.64346	0.472582	5.3921	4.88111	4.1182	2.2119	4.97176	2.95843	FALSE	FALSE	FALSE	FALSE
MMETSP0851-20130426|152125_1	0.59607	22.7133	32.857	27.6989	20.8568	19.572	15.1842	22.4411	18.6102	12.6422	34.6629	32.4629	21.2394	13.9724	23.5418	14.3554	13.8733	7.95831	6.24646	12.304	18.2624	23.9428	12.2871	20.8944	11.6604	18.5319	20.4892	27.7456	16.5324	FALSE	FALSE	FALSE	Name=Pfam:Ion_trans; Dbxref=Pfam:PF00520.26; Description=ion transport protein; Ontology_term=InterPro:IPR005821; score=45.10; evalue=6.00e-12;
MMETSP0851-20130426|182553_1	0.59695	5.8569	3.98683	3.5993	4.08068	2.796	5.26548	0.561026	3.1017	0.173181	3.22445	0	1.75532	0	1.79123	5.01573	1.90418	0	0	0.414741	1.54767	1.38799	1.57527	4.94275	0.271173	2.26501	0.58208	5.4529	0.870128	FALSE	FALSE	FALSE	FALSE
MMETSP0851-20130426|170592_1	0.597627	6.57115	6.04899	5.16421	1.96477	3.59486	2.32661	3.36616	2.12221	0.865905	9.47183	1.25663	5.26596	4.78004	4.73395	7.43712	7.61673	0.898519	1.6438	1.10598	1.70243	5.03145	2.99302	2.69605	0.813518	1.64728	4.42381	3.04721	3.65454	and related	-	GFO_IDH_MocA	Name=Pfam:GFO_IDH_MocA; Dbxref=Pfam:PF01408.17; Description=oxidoreductase family nad-binding rossmann fold; Ontology_term=InterPro:IPR000683; score=32.50; evalue=9.30e-08;
MMETSP0851-20130426|7667_1	0.59831	3.57128	3.02449	0.156491	4.68522	2.66286	2.69397	4.34795	2.61195	1.21227	3.62751	1.88494	6.49468	3.8608	0.383834	1.03774	1.63216	0	1.86298	1.10598	2.94056	5.03145	3.4656	2.69605	7.59284	3.50047	1.39699	2.40569	1.21818	FALSE	FALSE	FALSE	FALSE
MMETSP0851-20130426|193285_1	0.59831	14.9994	12.9228	13.1453	10.8818	12.9149	6.2451	11.9218	8.48885	5.54179	4.83668	15.4984	9.65426	9.56008	13.6901	10.2044	9.79294	12.0658	3.94513	13.963	9.75029	6.41944	6.14356	8.98683	4.06759	12.5605	6.28646	5.13214	10.0935	FALSE	FALSE	FALSE	FALSE
MMETSP0851-20130426|9015_1	0.598435	6.4283	10.0358	2.66035	8.7659	30.0903	6.36755	8.13488	35.5879	16.6254	14.51	7.74921	33.8777	6.98621	12.1547	8.47485	3.80837	0.641799	5.69852	1.93546	2.16673	4.68445	7.08872	7.86347	13.5586	36.0342	3.95814	4.00949	4.69869	FALSE	FALSE	FALSE	FALSE
MMETSP0851-20130426|143068_1	0.598435	2.28562	4.67422	2.19088	4.23181	2.39657	2.57151	3.36616	2.12221	2.59771	6.65044	0	5.09043	0.551543	2.30301	0.172956	13.0573	0	0.547935	0.552988	2.47626	3.99046	1.10269	4.04407	0	5.35366	4.77305	0.801897	0.522077	FALSE	FALSE	FALSE	FALSE
MMETSP0851-20130426|116722_1	0.600057	6.71401	15.9473	7.0421	8.91703	11.5834	10.0411	12.2023	212.548	5.88815	199.715	16.3362	9.47873	30.8864	31.3465	180.566	1819.31	1.66868	10.8491	4.7004	3.40486	64.1944	70.4147	5.61677	69.149	10.2955	6.98496	3.04721	6.09089	FALSE	FALSE	FALSE	FALSE
MMETSP0851-20130426|12357_1	0.600406	7.42826	7.69871	10.1719	8.46363	9.98573	7.22473	6.4518	12.2435	11.2568	8.46419	2.93213	14.0426	14.524	8.95613	8.12894	2.44824	16.1733	5.69852	14.3777	7.42879	9.36891	8.19141	4.94275	7.86401	9.47186	6.75212	14.4342	5.22077	-	-	-	FALSE
MMETSP0851-20130426|192887_1	0.600406	15.7136	24.7458	15.9621	14.8113	22.368	20.3272	15.1477	24.3238	20.4354	35.469	4.60764	25.2766	12.3178	15.2254	15.739	16.0495	4.87767	5.26018	8.01833	10.3694	15.4413	10.8694	25.1631	23.3209	18.326	16.1818	24.6984	10.6156	FALSE	FALSE	FALSE	Name=Pfam:EF_hand_3; Dbxref=Pfam:PF13202.1; Description=ef hand; Ontology_term=InterPro:IPR002048; score=34.50; evalue=6.90e-09;
MMETSP0851-20130426|16998_1	0.600406	8.71392	3.02449	3.91228	5.89431	0.932001	2.93887	6.87257	2.44871	60.9597	0	0.418876	3.33511	0.183848	1.66328	0.691825	2.72026	0	0.767109	0.276494	0.619066	1.38799	7.71883	0.449341	0	15.6492	1.39699	3.20759	0.870128	FALSE	FALSE	FALSE	FALSE
MMETSP0851-20130426|61532_1	0.600406	7.57111	8.79852	6.72912	6.19658	11.9829	14.8168	9.81796	11.1008	15.9327	27.0048	8.58696	6.84575	3.4931	6.52518	5.18869	4.35242	7.82995	2.08215	8.84781	6.96449	3.99046	2.99302	2.92072	11.6604	15.8551	3.95814	4.81138	2.61038	FALSE	FALSE	FALSE	FALSE
MMETSP0851-20130426|130160_1	0.600406	16.1422	16.7722	25.5081	22.217	12.9149	23.2661	15.849	14.529	23.2063	11.0841	17.8022	16.8511	24.2679	10.7474	28.0189	18.2258	4.62095	9.20531	10.092	18.1077	15.4413	17.643	24.9384	10.8469	14.0019	18.3937	13.1511	12.8779	FALSE	FALSE	FALSE	Name=Pfam:BT1; Dbxref=Pfam:PF03092.11; Description=bt1 family; Ontology_term=InterPro:IPR004324; score=123.90; evalue=6.10e-36;
MMETSP0851-20130426|92239_1	0.601441	23.5704	21.7214	22.6912	23.275	29.4246	19.3476	17.6723	15.835	11.0836	11.0841	25.1326	18.9575	13.6047	14.7136	17.8145	17.1376	3.46571	6.35605	7.18885	10.2146	14.5739	9.92421	38.194	11.9316	36.0342	10.8267	21.4908	7.30907	FALSE	FALSE	FALSE	FALSE
MMETSP0851-20130426|123828_1	0.601872	2.85702	5.49908	4.06877	5.28977	2.39657	9.06152	8.13488	2.61195	77.7583	8.06114	2.09438	4.56383	6.98621	4.22218	3.45912	13.6013	0	0	0.552988	1.70243	4.85795	0.472582	1.34802	4.33876	19.3555	3.02681	1.60379	1.21818	Belongs to the syntaxin family	ko:K08486	SNARE,Syntaxin	Name=Pfam:SNARE; Dbxref=Pfam:PF05739.14; Description=snare domain; Ontology_term=InterPro:IPR000727; score=38.60; evalue=5.70e-10;
MMETSP0851-20130426|119330_1	0.601872	2.85702	7.56123	7.0421	7.55681	2.52972	6.2451	6.03103	10.6111	1.73181	17.936	7.33033	5.61702	7.17006	4.98984	5.70756	1.90418	0	2.19174	2.3502	1.70243	6.07244	8.664	9.66084	5.15228	4.94184	1.51341	8.98125	1.04415	Cyclin and CBS domain divalent metal cation transport mediator 2	ko:K16302	CBS,DUF21	FALSE
MMETSP0851-20130426|1725_1	0.601872	19.9992	27.3579	19.0919	25.8443	13.7137	12.2453	13.4646	11.5905	3.6368	12.0917	32.2535	14.9202	24.8194	26.9963	22.6573	9.52092	16.045	48.9854	18.5251	40.0845	37.3021	50.8813	13.7049	14.101	13.796	43.7724	30.6325	24.5376	Popeye protein conserved region	-	Popeye	Name=Pfam:cNMP_binding; Dbxref=Pfam:PF00027.24; Description=cyclic nucleotide-binding domain; Ontology_term=InterPro:IPR000595; score=35.90; evalue=4.30e-09;
MMETSP0851-20130426|161943_1	0.601872	21.2848	22.1338	20.3439	16.0204	21.3029	19.5925	14.3062	22.5281	18.8767	60.66	26.3892	14.9202	17.0978	11.7709	14.1824	11.6971	3.97915	2.5205	7.74184	11.6075	15.2678	8.03389	16.6256	10.0334	16.2669	10.1282	16.0379	10.4415	Solute carrier family 35 (UDP-N-acetylglucosamine (UDP-GlcNAc) transporter), member A3	ko:K15272	Nuc_sug_transp	Name=Pfam:Nuc_sug_transp; Dbxref=Pfam:PF04142.10; Description=nucleotide-sugar transporter; Ontology_term=InterPro:IPR007271; score=256.50; evalue=1.60e-76;
MMETSP0851-20130426|44390_1	0.601872	8.85677	6.18646	11.7368	10.4284	12.9149	13.4698	8.83616	13.3863	0.519543	0	27.4364	18.2553	10.1116	10.6194	12.2799	4.62444	30.0362	1.86298	16.3132	12.6909	11.4509	5.1984	11.9075	0	8.85413	7.56704	4.33025	9.74543	FALSE	FALSE	FALSE	FALSE
MMETSP0851-20130426|132358_1	0.601872	3.71413	6.73637	7.82456	7.55681	5.45886	5.75529	4.90898	5.22391	2.42453	7.45655	13.1946	5.96809	4.59619	9.85174	9.68555	8.70484	16.5584	7.12315	8.01833	4.02393	5.55194	11.1844	2.69605	4.60994	9.47186	4.54022	6.73594	4.52466	FALSE	FALSE	FALSE	FALSE
MMETSP0851-20130426|195116_1	0.601872	21.7134	26.3956	35.993	15.4159	19.3057	12.4902	19.9164	17.4674	13.3349	42.1194	18.64	13.867	22.7971	19.9594	29.5755	17.6817	74.8338	59.177	49.769	50.4539	30.0152	38.2791	26.9605	29.829	25.7387	32.5965	37.3684	44.8986	FALSE	FALSE	FALSE	FALSE
MMETSP0851-20130426|63426_1	0.601872	14.9994	19.7967	14.3972	15.8693	8.92058	31.2255	10.5192	21.2221	5.02225	8.26266	10.4719	10.0053	10.847	7.67668	8.99372	34.5473	3.97915	2.84926	3.17968	6.34543	14.5739	18.1156	11.6829	12.4739	19.3555	4.07456	14.2738	7.13505	FALSE	FALSE	FALSE	FALSE
MMETSP0851-20130426|138728_1	0.601872	6.85686	5.22412	6.10316	5.4409	4.12743	2.93887	5.32975	3.59144	5.71497	4.63515	9.21527	2.98404	0.735391	3.07067	9.51259	9.52092	7.31651	5.47935	5.94463	1.8572	6.24594	2.67796	4.04407	1.35586	2.88274	3.02681	1.44342	2.26233	FALSE	FALSE	FALSE	FALSE
MMETSP0851-20130426|192613_1	0.601872	39.8555	66.4014	45.3824	62.7215	65.2401	60.2469	55.2611	50.1169	35.8485	33.0507	68.0673	54.0638	41.9173	39.1511	52.0598	42.1641	17.4569	21.1503	28.4789	31.1081	82.2382	28.3549	44.0354	65.895	58.6843	32.9457	55.9724	37.4155	FALSE	FALSE	FALSE	FALSE
MMETSP0851-20130426|61410_1	0.601872	3.14273	2.06215	4.53824	1.51136	15.1783	3.18378	7.57385	115.089	10.564	0	22.8287	19.484	45.5942	11.1312	55.0001	849.81	6.41799	8.76696	15.3454	4.1787	220.69	433.042	18.423	83.5212	5.14775	2.79398	3.36797	14.4441	FALSE	FALSE	FALSE	FALSE
MMETSP0851-20130426|110583_1	0.601872	9.42818	11.5481	15.0232	9.52158	9.98573	7.83699	15.5685	11.7538	17.1449	5.23974	1.25663	21.5904	1.47078	10.3635	9.51259	11.1531	16.8151	4.60265	13.6865	8.20263	5.37845	3.78065	8.76215	4.60994	10.2955	6.75212	10.1039	7.4831	FALSE	FALSE	FALSE	FALSE
MMETSP0851-20130426|2237_1	0.601872	3.57128	5.08665	5.47719	3.62727	5.05944	3.9185	4.48821	1.14273	1.90499	1.20917	6.49258	3.33511	3.12541	2.43095	1.55661	5.1685	0.385079	0.547935	1.52072	1.8572	5.03145	5.82851	2.92072	0.271173	3.91229	2.44473	2.08493	2.61038	FALSE	FALSE	FALSE	FALSE
MMETSP0851-20130426|133961_1	0.601872	3.85698	9.48591	5.3207	11.6375	6.52401	7.34718	6.31155	7.34612	3.11726	5.44127	0	10.0053	2.94156	2.43095	13.3176	0	0.513439	2.95885	1.24422	2.47626	5.37845	4.56829	3.14539	6.77932	7.20685	2.44473	4.49063	2.95843	FALSE	FALSE	FALSE	FALSE
MMETSP0851-20130426|67067_1	0.601872	2.71417	3.29945	1.40842	2.11591	3.86115	1.95925	3.78693	3.1017	11.4299	2.41834	5.86426	5.09043	0.735391	3.45451	4.49686	0.816078	7.44487	5.26018	2.90319	0.619066	1.73498	3.62313	3.8194	0.271173	7.41276	0.931327	0	1.74026	FALSE	FALSE	FALSE	FALSE
MMETSP0851-20130426|108753_1	0.601922	5.28549	7.42375	7.35508	6.49886	3.46172	4.28585	8.27514	9.79483	3.98316	6.85197	5.86426	4.56383	2.94156	3.32656	3.28617	12.2412	6.80307	32.109	4.9769	2.3215	4.85795	2.04785	6.96479	4.88111	7.00094	1.74624	1.12266	5.39479	Carrier of the growing fatty acid chain in fatty acid biosynthesis	-	PP-binding	Name=Pfam:PP-binding; Dbxref=Pfam:PF00550.20; Description=phosphopantetheine attachment site; Ontology_term=InterPro:IPR009081; score=43.60; evalue=2.40e-11;
MMETSP0851-20130426|12082_1	0.601922	9.14248	15.6724	13.9277	13.3	21.436	15.5515	12.7633	14.529	31.3458	44.7393	165.875	22.117	67.2882	29.4273	48.0818	32.0991	192.796	357.582	68.0176	79.2405	56.5604	71.2023	60.2117	24.6767	30.4747	65.6586	47.4723	65.7816	Soluble NSF attachment protein, SNAP	ko:K15296	SNAP	FALSE
MMETSP0851-20130426|466_1	0.601922	1.42851	1.64972	3.12982	2.26704	1.99715	0.612265	4.34795	0.163247	0.173181	62.6753	10.2625	1.22872	5.69928	4.60601	8.64781	7.34471	26.1854	4.60265	15.6219	4.79776	4.85795	6.61614	7.6388	0	4.1182	7.45062	3.84911	5.22077	FALSE	FALSE	FALSE	Name=Pfam:PT; Dbxref=Pfam:PF04886.7; Description=pt repeat; Ontology_term=InterPro:IPR006970; score=58.90; evalue=1.90e-16;
MMETSP0851-20130426|191568_1	0.601922	46.1409	51.5539	41.9396	58.1874	58.1835	53.6344	48.669	55.0143	36.368	33.8568	57.5954	46.3404	34.3795	48.3631	52.4057	35.0914	47.7498	27.068	73.271	34.8225	41.1191	40.1694	55.269	33.6254	35.2106	37.3695	57.4159	52.2077	FALSE	FALSE	FALSE	Name=Pfam:Asp; Dbxref=Pfam:PF00026.18; Description=eukaryotic aspartyl protease; Ontology_term=InterPro:IPR001461; score=84.50; evalue=6.80e-24;
MMETSP0851-20130426|137660_1	0.601922	8.99962	9.34843	7.82456	9.06817	6.25772	6.97982	10.5192	10.7743	14.7204	4.2321	1.6755	4.03724	6.06697	5.50162	10.3774	12.7852	2.43884	4.27389	3.04144	5.57159	10.0629	3.93818	14.1542	4.33876	8.2364	4.19097	15.0757	7.13505	FALSE	FALSE	FALSE	FALSE
MMETSP0851-20130426|141396_1	0.601922	2.71417	5.77403	2.66035	1.6625	7.98858	5.87774	16.1295	14.2025	22.1672	1.4107	12.9852	31.9468	4.04465	7.1649	23.695	1.90418	3.72243	10.8491	21.843	0.773833	4.33746	8.19141	17.2996	78.6401	10.2955	1.86265	4.81138	1.3922	FALSE	FALSE	FALSE	FALSE
MMETSP0851-20130426|9717_1	0.601922	3.71413	3.71188	4.06877	4.23181	3.19543	0.857171	10.2387	7.34612	1.73181	1.20917	0	0.87766	6.43467	2.94273	4.32391	14.9614	10.9106	2.08215	8.84781	3.2501	3.12297	7.71883	7.18946	4.06759	3.91229	1.51341	3.68873	1.56623	FALSE	FALSE	FALSE	FALSE
MMETSP0851-20130426|191143_1	0.601922	111.567	95.8214	113.926	111.085	99.0584	120.616	112.766	71.5022	136.64	60.66	81.6808	104.968	75.0098	128.968	70.0473	50.5969	104.228	27.068	89.3076	60.0494	85.8816	43.7926	82.2295	90.3005	94.3067	71.363	83.2369	65.7816	FALSE	FALSE	FALSE	Name=Pfam:SNF2_N; Dbxref=Pfam:PF00176.18; Description=snf2 family n-terminal domain; Ontology_term=InterPro:IPR000330; score=199.20; evalue=5.80e-59;
MMETSP0851-20130426|5796_1	0.601922	6.85686	4.67422	6.88561	8.91703	6.65715	7.46963	12.6231	8.48885	5.02225	0.604585	1.6755	7.02128	10.2955	7.03696	6.57234	0	0.641799	0	6.91235	15.0124	3.46997	3.93818	6.74012	0	3.91229	17.346	39.6137	8.70128	FALSE	FALSE	FALSE	FALSE
MMETSP0851-20130426|4574_1	0.601922	10.571	17.4596	13.7712	29.6227	19.3057	6.12265	18.6541	25.793	34.2898	21.362	9.84359	17.0266	17.8332	16.7608	25.7705	30.1949	18.3555	13.808	39.1239	11.298	17.3498	16.6979	21.3437	24.6767	24.0915	13.5042	22.6135	12.1818	FALSE	FALSE	FALSE	FALSE
MMETSP0851-20130426|13271_1	0.603185	19.1421	23.0961	23.1607	24.7863	20.504	18.123	27.0695	23.3443	6.23452	46.7546	31.6251	20.7128	37.5049	47.9793	65.5504	36.9956	43.6423	102.354	127.879	31.8819	37.8226	34.656	29.8812	57.2174	23.2678	45.8679	59.9819	46.9869	GRIP domain	-	GRIP	Name=Pfam:GRIP; Dbxref=Pfam:PF01465.15; Description=grip domain; Ontology_term=InterPro:IPR000237; score=25.80; evalue=5.20e-06;
MMETSP0851-20130426|150963_1	0.603185	1.14281	2.88702	3.44281	2.56931	3.46172	3.67359	4.90898	14.3657	0.346362	1.4107	10.8908	1.93085	3.67695	2.94273	5.01573	103.914	0.513439	1.09587	3.31793	0.928599	19.9523	31.5054	1.57269	8.67753	6.58912	2.44473	3.04721	2.78441	FALSE	FALSE	FALSE	FALSE
MMETSP0851-20130426|72819_1	0.603185	24.5704	20.0716	27.386	27.9602	22.2349	21.7966	12.4828	16.6512	42.4293	11.2856	19.4777	17.3777	6.43467	17.2725	13.6635	11.4251	30.4213	17.2052	7.60359	9.59552	12.6654	14.0199	10.3348	32.5407	59.0961	7.68345	8.66049	5.39479	FALSE	FALSE	FALSE	Name=Pfam:PsbK; Dbxref=Pfam:PF02533.10; Description=photosystem ii 4 kda reaction centre component; Ontology_term=InterPro:IPR003687; score=54.00; evalue=9.90e-15;
MMETSP0851-20130426|65725_1	0.603185	4.28554	1.09982	0.782456	2.72045	5.59201	2.93887	2.66487	4.40767	0.865905	3.22445	0.209438	1.05319	1.65463	0.767668	0.864781	1.0881	4.10751	19.0681	3.87092	3.09533	0.346997	0	2.47138	6.23697	2.0591	1.28058	0.962277	0.174026	FALSE	FALSE	FALSE	FALSE
MMETSP0851-20130426|109928_1	0.603634	2.99987	3.02449	3.75579	0.302272	0.932001	2.44906	4.34795	1.30598	3.46362	4.2321	0	0.175532	0.183848	0.895613	2.07547	0.544052	0	0	0.138247	0.154767	4.16396	1.41774	10.1102	6.23697	4.53002	0.814911	0	1.21818	FALSE	FALSE	FALSE	FALSE
MMETSP0851-20130426|133028_1	0.603634	3.71413	10.7232	7.0421	8.7659	7.98858	10.6534	8.41539	18.4469	13.1618	7.45655	4.3982	5.61702	9.00853	5.88546	7.61007	2.17621	1.9254	1.53422	4.7004	5.72636	7.98092	9.45163	15.7269	11.1181	15.2373	6.17004	6.57556	6.78699	FALSE	FALSE	FALSE	Name=Pfam:DUF4116; Dbxref=Pfam:PF13475.1; Description=domain of unknown function (duf4116); Ontology_term=InterPro:IPR025197; score=128.50; evalue=4.00e-38;
MMETSP0851-20130426|6711_1	0.60581	31.5701	40.1433	29.5768	41.8647	29.824	41.0217	43.3393	35.9144	17.6645	31.2369	18.8494	34.4043	46.8811	50.5382	56.3837	78.0715	116.679	72.2178	77.5566	57.2636	92.6481	72.4625	19.5463	46.0994	34.5929	44.3545	51.6422	66.1297	FALSE	FALSE	FALSE	Name=Pfam:FAD_binding_8; Dbxref=Pfam:PF08022.7; Description=fad-binding domain; Ontology_term=InterPro:IPR013112; score=54.70; evalue=6.70e-15;
MMETSP0851-20130426|11985_1	0.60581	49.2837	64.7516	48.9817	50.4795	64.7075	60.002	146.989	87.6637	61.3061	102.175	108.279	77.5851	61.2213	47.7234	60.5347	91.1288	38.3796	99.0666	57.0961	59.7399	123.357	151.384	116.155	66.1661	66.5089	88.4761	81.3124	81.0959	FALSE	FALSE	FALSE	Name=Pfam:CHAT; Dbxref=Pfam:PF12770.2; Description=chat domain; Ontology_term=InterPro:IPR024983; score=32.70; evalue=3.50e-08;
MMETSP0851-20130426|57542_1	0.60581	32.9986	23.0961	28.4814	21.4613	15.4446	27.307	20.3372	18.2837	9.69814	18.1376	15.0795	36.8617	16.5463	9.85174	10.8962	38.6277	6.03291	3.28761	7.46534	13.1552	44.0686	22.2113	6.74012	22.7785	12.1487	10.5938	10.7454	9.5714	FALSE	FALSE	FALSE	FALSE
MMETSP0851-20130426|42437_1	0.60581	8.99962	10.7232	7.82456	4.98749	9.5863	7.59208	10.379	5.38716	0	6.44891	24.9231	2.63298	6.98621	9.85174	15.0472	10.881	2.31048	1.09587	3.31793	8.97646	8.84841	6.45862	7.6388	9.21987	10.5014	9.31327	21.8116	9.74543	FALSE	FALSE	FALSE	FALSE
MMETSP0851-20130426|144797_1	0.606236	7.57111	7.42375	6.41614	10.5795	3.99429	8.3268	4.48821	4.08118	0	2.61987	1.25663	6.67021	1.65463	7.42079	2.94026	0.272026	0.770159	1.86298	1.65897	2.94056	10.5834	2.04785	4.04407	0.271173	5.55957	8.84761	1.44342	9.04933	FALSE	FALSE	FALSE	FALSE
MMETSP0851-20130426|159013_1	0.606434	66.4258	61.3147	58.6842	66.1976	50.0618	67.9614	54.9806	54.0348	25.1112	13.9055	38.9555	40.8989	27.0256	40.8144	41.8554	22.0341	10.9106	7.89026	21.2901	21.203	35.5671	13.8624	42.4627	38.2353	41.7997	36.5546	43.6232	28.0181	Aspartate aminotransferase	ko:K14454,ko:K14455	Aminotran_1_2	Name=Pfam:Aminotran_1_2; Dbxref=Pfam:PF00155.16; Description=aminotransferase class i and ii; Ontology_term=InterPro:IPR004839; score=274.70; evalue=9.30e-82;
MMETSP0851-20130426|160418_1	0.606434	6.85686	7.56123	8.76351	4.98749	12.116	3.79604	4.06744	2.93845	1.90499	5.03821	4.3982	4.21277	1.65463	1.79123	4.49686	8.16078	1.2836	2.84926	1.38247	6.34543	5.03145	3.4656	4.04407	9.76222	4.73593	1.97907	11.0662	2.08831	response regulator receiver	-	HTH_17,Response_reg	Name=Pfam:Response_reg; Dbxref=Pfam:PF00072.19; Description=response regulator receiver domain; Ontology_term=InterPro:IPR001789; score=50.30; evalue=1.80e-13;
MMETSP0851-20130426|39692_1	0.606434	28.8559	45.5049	27.5424	29.1693	191.859	60.4918	88.5019	120.15	133.349	322.848	794.817	186.239	540.328	419.531	260.299	993.984	1235.46	631.221	477.782	650.484	218.261	518.58	339.702	252.191	144.549	403.265	189.248	413.311	Ribosomal protein L1p/L10e family	ko:K02865	Ribosomal_L1	Name=Pfam:Ribosomal_L1; Dbxref=Pfam:PF00687.16; Description=ribosomal protein l1p/l10e family; Ontology_term=InterPro:IPR002143; score=157.10; evalue=3.70e-46;
MMETSP0851-20130426|157952_1	0.608375	28.5702	35.8815	34.1151	32.4943	33.552	21.5517	28.8929	28.5682	19.9158	60.4585	36.4422	49.3245	54.9704	97.11	62.9561	67.1905	453.88	295.556	116.957	183.863	99.241	275.673	42.4627	33.6254	41.7997	159.723	93.6616	152.098	Phosphoglucose isomerase	ko:K01810	PGI	Name=Pfam:PGI; Dbxref=Pfam:PF00342.14; Description=phosphoglucose isomerase; Ontology_term=InterPro:IPR001672; score=627.00; evalue=1.60e-188;
MMETSP0851-20130426|33748_1	0.608375	7.85682	8.79852	3.75579	5.59204	6.79029	12.6127	4.48821	6.85638	16.6254	7.65808	129.852	14.0426	47.2488	6.39724	6.74529	1.90418	3.46571	0.986283	4.00917	0.773833	0.867491	0.630109	50.1016	23.8632	19.1496	1.86265	0.801897	2.78441	FALSE	FALSE	FALSE	FALSE
MMETSP0851-20130426|119094_1	0.608375	0.571405	4.53674	3.28631	3.325	1.46457	2.44906	4.2077	1.46922	5.19543	4.43362	0	3.8617	5.14773	1.1515	0.864781	2.72026	0.12836	0	0.414741	1.08337	2.42898	1.10269	3.37006	0	2.88274	2.67757	3.68873	1.3922	FALSE	FALSE	FALSE	FALSE
MMETSP0851-20130426|125220_1	0.608375	17.5707	15.6724	17.3705	9.97499	9.05373	11.0208	9.25693	13.3863	13.6813	16.1223	6.0737	16.5	15.0755	9.7238	14.3554	14.1454	28.2392	12.9313	12.0275	11.1432	6.24594	11.9721	13.2556	3.79642	23.0619	10.361	12.8304	12.8779	FALSE	FALSE	FALSE	Name=Pfam:Fasciclin; Dbxref=Pfam:PF02469.17; Description=fasciclin domain; Ontology_term=InterPro:IPR000782; score=98.00; evalue=3.60e-28;
MMETSP0851-20130426|8702_1	0.608375	20.2849	28.3203	24.2561	15.8693	20.3709	19.47	23.5631	28.0785	36.7144	36.2751	15.289	27.9096	26.8418	18.424	11.4151	27.7467	12.5793	29.9173	17.2809	27.0841	27.5862	47.1006	19.771	4.88111	20.7969	39.6978	41.859	30.2804	FALSE	FALSE	FALSE	Name=Pfam:Glyco_trans_1_2; Dbxref=Pfam:PF13524.1; Description=glycosyl transferases group 1; score=50.10; evalue=2.20e-13;
MMETSP0851-20130426|158574_1	0.608375	11.5709	21.1714	12.3628	6.34772	8.25487	11.0208	7.29334	12.4068	6.75406	5.84432	18.64	12.2872	9.37623	9.08408	12.9717	7.61673	15.5315	8.32861	8.98606	7.73833	3.46997	4.25323	5.61677	17.8974	16.061	8.73119	8.50011	5.91687	FALSE	FALSE	FALSE	FALSE
MMETSP0851-20130426|148984_1	0.608375	2.14277	5.3616	4.22526	3.02272	3.06229	2.20415	2.24411	2.61195	0	0	2.72269	3.51064	7.90545	3.7104	4.32391	2.17621	0.641799	0.438348	0.414741	1.8572	1.04099	6.45862	2.69605	0	4.1182	3.95814	2.24531	1.74026	FALSE	FALSE	FALSE	Name=Pfam:efhand; Dbxref=Pfam:PF00036.27; Description=ef hand; Ontology_term=InterPro:IPR002048; score=53.30; evalue=5.60e-15;
MMETSP0851-20130426|110990_1	0.610855	42.8554	59.9399	35.367	50.9329	65.6395	36.0012	61.1519	54.851	30.653	55.0173	55.2916	47.3936	46.3296	41.582	38.7422	31.011	13.8629	12.9313	25.9905	31.5724	47.5385	29.9302	53.6963	30.9137	51.8893	26.7757	38.1703	41.244	FALSE	FALSE	FALSE	FALSE
MMETSP0851-20130426|189157_1	0.610855	5.71405	7.97366	10.7979	8.91703	5.45886	7.95944	9.6777	4.89741	10.7372	5.84432	7.95864	7.72341	7.90545	2.04712	5.18869	7.88876	2.05376	4.60265	5.25339	6.80973	10.0629	16.0678	8.98683	1.62704	4.94184	7.45062	10.7454	6.96102	FALSE	FALSE	FALSE	FALSE
MMETSP0851-20130426|175918_1	0.611477	14.428	13.6102	14.7102	11.7886	17.708	10.6534	13.0439	7.18287	13.8545	4.2321	8.37752	12.2872	16.7301	16.7608	16.0849	20.674	238.493	79.8889	78.8008	130.778	22.9018	67.4216	16.6256	30.6425	19.3555	47.9634	51.1611	141.831	-	-	-	FALSE
MMETSP0851-20130426|71276_1	0.611477	20.9991	21.1714	14.2407	19.95	17.5749	22.164	19.2151	14.8555	10.3909	9.87489	7.33033	17.5532	9.37623	11.7709	7.61007	10.609	14.3763	3.17802	26.6817	13.4647	20.1258	5.35592	21.5684	13.5586	16.2669	9.31327	14.2738	12.7039	Belongs to the MCM family	ko:K02542	MCM,MCM_N,MCM_OB	FALSE
MMETSP0851-20130426|96371_1	0.611477	5.28549	7.28628	4.69474	9.21931	10.1189	9.55133	5.47001	9.63158	8.48587	14.7116	2.09438	7.89894	19.304	5.24573	3.45912	38.6277	1.54032	1.20546	4.83865	7.89309	14.4004	11.0269	45.1588	9.76222	4.32411	9.42969	12.8304	4.69869	FALSE	FALSE	FALSE	FALSE
MMETSP0851-20130426|82726_1	0.611477	52.5692	48.8043	38.3403	39.1443	37.4132	35.5114	33.5213	32.4862	43.4684	19.3467	24.0854	16.3245	31.0702	39.5349	32.1699	47.6046	10.0121	9.97242	14.6542	16.8696	49.2735	41.9022	29.6565	42.5741	35.6224	17.2296	17.9625	18.6207	FALSE	FALSE	FALSE	FALSE
MMETSP0851-20130426|4499_1	0.611477	19.4278	19.2468	20.1874	16.0204	17.708	25.8376	26.9293	12.57	42.7757	6.44891	5.44539	17.3777	12.1339	12.5386	11.761	11.1531	15.9166	4.38348	20.1841	5.72636	16.8293	3.15054	12.3569	17.3551	25.121	5.70438	14.2738	9.5714	FALSE	FALSE	FALSE	FALSE
MMETSP0851-20130426|180731_1	0.611477	6.4283	10.7232	11.1109	10.8818	17.8412	11.1432	8.55565	40.1588	27.0162	10.0764	20.7344	117.782	14.3401	6.26929	7.95599	5.71255	0.513439	7.67109	3.87092	2.16673	9.54241	3.78065	43.5861	108.74	54.3602	2.79398	27.5853	2.78441	FALSE	FALSE	FALSE	FALSE
MMETSP0851-20130426|10325_1	0.611983	20.2849	24.0585	26.6035	26.7511	30.3566	20.5721	32.1188	22.0384	16.9717	42.321	52.7784	32.2979	37.3211	36.5922	104.639	65.5583	43.514	51.1771	59.4463	20.4292	31.5767	37.9641	32.8019	50.1669	27.1801	16.7639	39.7741	29.7584	-	-	-	FALSE
MMETSP0851-20130426|153586_1	0.611983	6.57115	3.43692	5.00772	6.04545	2.13029	1.22453	1.82334	0.816236	0.692724	0	2.72269	1.40426	2.20617	3.58245	1.38365	1.63216	0	1.97257	1.10598	2.63103	1.38799	2.04785	0.449341	0.271173	0.82364	1.16416	2.08493	4.00259	-	-	-	FALSE
MMETSP0851-20130426|56289_1	0.611983	13.7137	22.1338	15.8056	13.3	10.252	9.30643	9.6777	12.57	8.13951	21.1605	8.58696	35.4575	13.7886	14.7136	17.4686	18.7698	11.1673	47.7799	15.6219	47.2038	19.6053	37.0189	16.6256	8.9487	16.2669	48.8947	6.2548	54.644	Belongs to the short-chain dehydrogenases reductases (SDR) family	ko:K11166	adh_short	Name=Pfam:adh_short; Dbxref=Pfam:PF00106.20; Description=short chain dehydrogenase; Ontology_term=InterPro:IPR002198; score=88.20; evalue=5.10e-25;
MMETSP0851-20130426|4373_1	0.611983	93.4247	90.5973	117.525	129.675	42.7389	128.453	90.8863	112.151	40.178	1.00764	96.5509	76.0053	20.0394	72.9285	74.0253	13.0573	83.0488	20.9311	61.2435	28.1675	92.3011	25.5194	31.6786	89.487	51.0657	20.2564	15.3964	44.0285	This protein is an auxiliary protein of DNA polymerase delta and is involved in the control of eukaryotic DNA replication by increasing the polymerase's processibility during elongation of the leading strand	ko:K04802	PCNA_C,PCNA_N	Name=Pfam:PCNA_C; Dbxref=Pfam:PF02747.10; Description=proliferating cell nuclear antigen c-terminal domain; Ontology_term=InterPro:IPR022649; score=72.50; evalue=2.60e-20;
MMETSP0851-20130426|193108_1	0.611983	55.9977	63.5143	35.8365	52.142	68.1692	53.3895	56.5234	44.0767	40.178	36.2751	43.7725	40.3724	34.3795	82.1405	47.563	81.8799	13.4778	17.2052	33.594	32.0367	56.3869	37.0189	45.1588	74.0301	58.2725	33.9935	51.3214	45.2466	FALSE	FALSE	FALSE	FALSE
MMETSP0851-20130426|181972_1	0.613149	9.14248	12.098	6.57263	15.567	8.52115	6.97982	16.5503	10.2846	7.2736	12.4948	3.14157	2.63298	4.96389	12.0268	12.7988	4.62444	13.6061	2.84926	11.3363	6.19066	11.9714	3.30807	8.98683	2.9829	9.88368	7.3342	8.17935	5.91687	FALSE	FALSE	FALSE	FALSE
MMETSP0851-20130426|1775_1	0.613149	0	1.7872	1.40842	1.20909	2.13029	1.46944	0.561026	1.63247	0	3.62751	0.209438	2.28192	0.919238	2.68684	0.864781	0	6.93143	10.082	4.28566	1.08337	1.21449	0	6.06611	10.0334	0.82364	0.58208	2.72645	0.870128	FALSE	FALSE	FALSE	FALSE
MMETSP0851-20130426|164505_1	0.614523	10.571	10.5857	10.0154	10.4284	10.6514	11.2657	10.6595	9.79483	11.6031	19.3467	9.21527	7.54787	8.64084	12.6665	20.5818	13.3293	1.41196	0.986283	4.83865	6.03589	6.59293	3.93818	8.53748	14.6433	14.8255	7.68345	5.61328	9.74543	FALSE	FALSE	FALSE	FALSE
MMETSP0851-20130426|12044_1	0.615245	32.9986	28.1828	30.6723	36.2727	40.0761	35.144	27.6305	34.7716	15.9327	39.298	20.3155	28.0851	39.7111	31.7303	33.7265	36.4515	74.4487	130.847	54.4694	36.5249	40.9456	52.1415	32.5772	32.8119	33.1515	38.3008	59.18	50.1193	Belongs to the peptidase A1 family	-	TAXi_N	Name=Pfam:Asp; Dbxref=Pfam:PF00026.18; Description=eukaryotic aspartyl protease; Ontology_term=InterPro:IPR001461; score=43.90; evalue=1.60e-11;
MMETSP0851-20130426|104098_1	0.615648	28.8559	19.3842	27.5424	28.4136	37.6795	29.1438	28.1916	29.711	21.3013	23.7804	19.8966	26.6809	32.1733	23.9257	24.0409	16.8656	5.77619	4.49307	13.8247	10.9884	28.2802	14.9651	18.1983	30.3713	26.9742	16.1818	28.2268	14.4441	FALSE	FALSE	FALSE	FALSE
MMETSP0851-20130426|134382_1	0.615648	7.85682	11.2731	14.8667	9.67271	11.184	11.8779	12.6231	10.6111	2.7709	8.86725	20.106	8.07447	4.2285	5.75751	12.6258	3.26431	25.1585	15.123	9.4008	6.03589	17.6968	3.93818	12.1322	11.1181	11.531	4.42381	11.7077	10.9636	FALSE	FALSE	FALSE	FALSE
MMETSP0851-20130426|149575_1	0.615953	27.4274	30.2449	35.054	34.1568	50.0618	31.2255	35.2044	31.6699	36.7144	129.583	21.3627	28.2606	50.7419	55.7839	75.063	75.3512	214.361	321.419	127.602	121.492	129.43	139.884	35.7226	30.3713	47.3593	116.416	140.172	113.291	Belongs to the Ca(2 ) cation antiporter (CaCA) (TC 2.A.19) family	-	EF-hand_7,Na_Ca_ex	Name=Pfam:Na_Ca_ex; Dbxref=Pfam:PF01699.19; Description=sodium/calcium exchanger protein; Ontology_term=InterPro:IPR004837; score=176.80; evalue=1.50e-52;
MMETSP0851-20130426|168700_1	0.616202	33.4272	36.1564	33.9586	35.6681	21.5692	43.2259	34.9239	25.3033	8.31269	21.1605	19.8966	27.383	27.761	18.552	21.7925	14.4174	33.7586	9.86283	28.6171	13.6195	42.8541	12.1296	19.3217	13.2875	25.3269	15.3669	15.5568	17.7506	FALSE	FALSE	FALSE	FALSE
MMETSP0851-20130426|27557_1	0.616508	16.4279	16.0848	24.8821	17.2295	29.6909	28.7764	15.0075	10.1213	11.2568	1.61223	21.991	17.2021	32.541	15.7372	6.74529	10.881	17.5853	4.38348	16.8661	17.9529	7.63392	5.82851	16.8503	11.1181	9.88368	5.00588	12.5096	7.30907	60S ribosomal protein L8	ko:K02938	Ribosomal_L2,Ribosomal_L2_C	Name=Pfam:Ribosomal_L2_C; Dbxref=Pfam:PF03947.13; Description=ribosomal proteins l2 c-terminal domain; Ontology_term=InterPro:IPR022669; score=60.20; evalue=1.50e-16;
MMETSP0851-20130426|129860_1	0.616508	12.2852	13.3353	13.7712	12.9977	12.6486	15.674	17.6723	23.5076	32.9044	18.3391	48.3802	15.9734	12.3178	33.7774	24.9057	71.5429	10.9106	14.2463	10.2303	25.0722	33.8322	49.6211	17.749	63.7256	23.2678	13.9699	32.7174	15.4883	Acetyltransferase (GNAT) domain	ko:K20791	Acetyltransf_1	Name=Pfam:Acetyltransf_1; Dbxref=Pfam:PF00583.19; Description=acetyltransferase (gnat) family; Ontology_term=InterPro:IPR000182; score=55.10; evalue=5.30e-15;
MMETSP0851-20130426|191813_1	0.616508	22.1419	24.7458	13.4582	21.7636	15.7109	37.3482	20.6177	19.0999	11.6031	23.5788	18.8494	14.2181	9.92777	17.2725	12.9717	23.1222	3.97915	4.05472	4.9769	12.5361	14.0534	4.56829	44.9341	36.6083	12.7664	11.758	16.8398	11.3117	FALSE	FALSE	FALSE	Name=Pfam:efhand; Dbxref=Pfam:PF00036.27; Description=ef hand; Ontology_term=InterPro:IPR002048; score=39.60; evalue=1.30e-10;
MMETSP0851-20130426|105212_1	0.616508	3.71413	3.02449	3.12982	3.62727	3.06229	2.44906	1.40257	10.9376	0	7.45655	0	0.175532	8.0893	1.91917	1.72956	57.6695	0.12836	0	1.24422	4.02393	11.1039	7.87636	0.674012	6.50814	3.91229	0	3.68873	1.56623	FALSE	FALSE	FALSE	FALSE
MMETSP0851-20130426|143173_1	0.616938	17.5707	17.4596	19.4049	19.4966	9.85258	24.7355	14.4464	20.2426	14.5472	9.87489	18.64	17.9043	24.084	14.5857	16.6038	25.0264	2.95228	3.72596	9.53905	13.4647	15.0944	7.24625	27.8592	5.69463	23.0619	10.361	26.1419	14.7922	oxidoreductase activity	-	Aldo_ket_red	Name=Pfam:Aldo_ket_red; Dbxref=Pfam:PF00248.16; Description=aldo/keto reductase family; Ontology_term=InterPro:IPR023210; score=148.90; evalue=1.10e-43;
MMETSP0851-20130426|9894_1	0.617956	19.1421	24.6084	27.386	19.0432	17.4417	20.3272	15.9892	23.8341	14.2008	31.0354	6.70202	20.3617	19.1202	15.0975	14.5283	33.7312	6.16127	6.79439	6.49761	11.7623	20.4728	27.7248	20.2204	4.06759	15.2373	9.08044	14.4342	13.748	AhpC/TSA antioxidant enzyme	-	AhpC-TSA_2	Name=Pfam:AhpC-TSA_2; Dbxref=Pfam:PF13911.1; Description=ahpc/tsa antioxidant enzyme; score=68.90; evalue=2.90e-19;
MMETSP0851-20130426|189839_1	0.622233	80.5681	78.2244	90.9214	89.6237	40.8749	70.4105	55.4013	37.5468	49.3566	41.1118	47.7519	53.3617	32.7249	49.2587	54.8271	27.2026	52.6275	35.8349	65.5291	41.9417	37.6491	19.2183	34.5993	38.7777	55.3898	48.5454	61.5857	38.4596	Nitrate reductase is a key enzyme involved in the first step of nitrate assimilation in plants, fungi and bacteria	ko:K10534	Cyt-b5,FAD_binding_6,Mo-co_dimer,NAD_binding_1,Oxidored_molyb	Name=Pfam:Oxidored_molyb; Dbxref=Pfam:PF00174.14; Description=oxidoreductase molybdopterin binding domain; Ontology_term=InterPro:IPR000572; score=155.80; evalue=5.80e-46;
MMETSP0851-20130426|167880_1	0.622233	12.5709	19.2468	10.0154	15.7182	20.1046	15.5515	20.758	14.8555	6.23452	50.9867	20.3155	13.3404	9.00853	25.9728	12.2799	29.6509	269.684	185.092	55.9901	128.921	107.742	74.9829	21.3437	25.7614	14.8255	55.2976	45.7081	115.031	FALSE	FALSE	FALSE	Name=Pfam:Peptidase_M11; Dbxref=Pfam:PF05548.6; Description=gametolysin peptidase m11; Ontology_term=InterPro:IPR008752; score=41.40; evalue=7.10e-11;
MMETSP0851-20130426|11804_1	0.622994	14.8565	26.1206	12.9888	22.0659	16.2434	17.3883	14.7269	16.1615	9.17859	109.228	26.1797	8.60107	13.4209	19.0638	26.2893	22.0341	63.0247	78.6835	38.4327	26.3103	31.9237	24.7318	15.0529	25.4902	17.5023	36.2054	33.6797	36.8934	-	-	Pro_isomerase	Name=Pfam:Pro_isomerase; Dbxref=Pfam:PF00160.16; Description=cyclophilin type peptidyl-prolyl cis-trans isomerase/cld; Ontology_term=InterPro:IPR002130; score=39.70; evalue=4.70e-10;
MMETSP0851-20130426|93684_1	0.622994	12.7138	10.4482	15.3361	16.7761	7.7223	17.3883	9.11668	16.488	4.32952	4.83668	9.21527	8.25	31.0702	9.7238	6.39938	26.9306	4.87767	2.5205	3.04144	8.97646	14.2269	28.67	9.43617	4.88111	12.3546	5.1223	11.0662	5.91687	alpha/beta hydrolase fold	-	Abhydrolase_3	Name=Pfam:Abhydrolase_5; Dbxref=Pfam:PF12695.2; Description=alpha/beta hydrolase family; score=36.20; evalue=3.90e-09;
MMETSP0851-20130426|9206_1	0.622994	52.9978	55.5407	41.6267	56.6761	77.0898	53.1446	42.2172	144.8	23.899	21.1605	21.1532	33.5266	101.484	67.171	51.8869	437.146	11.8091	13.1504	34.0088	26.6198	171.243	112.317	22.2424	94.9104	41.3879	46.1007	26.3022	27.148	Chlorophyll A-B binding protein	-	Chloroa_b-bind	Name=Pfam:Chloroa_b-bind; Dbxref=Pfam:PF00504.16; Description=chlorophyll a-b binding protein; Ontology_term=InterPro:IPR022796; score=175.80; evalue=6.10e-52;
MMETSP0851-20130426|162063_1	0.622994	71.8541	56.6405	52.894	58.3386	47.5321	49.5935	63.5362	61.5442	27.0162	40.9103	38.1177	29.8404	50.9258	39.7908	40.1258	141.726	12.9643	14.1367	35.1148	30.489	59.5099	45.9979	52.7976	43.1165	56.0075	50.1753	44.1044	27.6701	YT521-B-like domain	ko:K20100	YTH	Name=Pfam:YTH; Dbxref=Pfam:PF04146.10; Description=yt521-b-like domain; Ontology_term=InterPro:IPR007275; score=150.20; evalue=2.40e-44;
MMETSP0851-20130426|190711_1	0.622994	14.8565	16.6347	25.821	8.61476	16.3766	6.73491	10.2387	8.48885	14.7204	24.1834	6.91145	7.54787	23.1648	16.7608	20.4088	6.2566	36.5825	7.89026	40.5064	24.9174	28.6272	17.9581	11.2335	8.40635	24.5033	15.4833	22.2927	25.2337	FALSE	FALSE	FALSE	Name=Pfam:PT; Dbxref=Pfam:PF04886.7; Description=pt repeat; Ontology_term=InterPro:IPR006970; score=34.00; evalue=1.20e-08;
MMETSP0851-20130426|1395_1	0.622994	7.85682	10.3108	9.54596	11.4863	10.5183	11.0208	6.4518	10.2846	17.4913	1.81376	5.86426	6.14362	10.6632	10.2356	7.95599	4.62444	1.9254	0.547935	2.21195	7.58356	8.32792	0.945163	10.3348	10.3046	9.06004	7.79987	6.09442	4.17661	FALSE	FALSE	FALSE	FALSE
MMETSP0851-20130426|134694_1	0.622994	39.8555	39.3184	23.4737	29.6227	28.3595	35.2665	43.76	35.0981	21.1281	39.0965	14.6607	27.383	21.8779	19.9594	24.9057	40.8039	12.7076	10.9587	18.8016	21.203	33.3117	29.7726	37.9693	27.3884	30.4747	26.31	44.1044	21.5792	FALSE	FALSE	FALSE	FALSE
MMETSP0851-20130426|150282_1	0.622994	47.998	56.503	58.2147	48.2124	71.8972	38.2053	50.2119	37.7101	33.7703	37.8873	27.2269	40.8989	62.1405	37.104	43.0661	33.4592	17.4569	13.1504	28.4789	48.5967	34.1792	36.8614	39.3174	56.6751	69.8035	60.8855	39.293	36.0233	FALSE	FALSE	FALSE	FALSE
MMETSP0851-20130426|151442_1	0.622994	17.5707	23.2336	15.3361	17.9852	14.5126	17.6332	12.3426	5.5504	5.88815	15.7192	10.4719	11.5851	22.2456	8.5723	10.0315	10.609	2.05376	2.41091	7.0506	8.82169	12.8389	5.67098	15.5023	10.8469	9.67777	10.1282	12.8304	7.30907	FALSE	FALSE	FALSE	FALSE
MMETSP0851-20130426|79619_1	0.622994	1.57136	2.19963	5.47719	4.98749	0.266286	3.55114	2.80513	2.12221	4.67589	0	0	0.702128	0.919238	3.96629	1.03774	0.272026	6.54635	0.876696	1.93546	0.928599	2.77597	0	3.8194	0	3.70638	1.39699	0.320759	0.522077	FALSE	FALSE	FALSE	FALSE
MMETSP0851-20130426|103335_1	0.622994	1.14281	0.824862	5.00772	0.453408	2.39657	0.489812	0.841539	0	0.173181	4.03057	0	0	0	1.53534	0.864781	0.272026	0.25672	0	0.691235	0.773833	1.90848	0	0.224671	0.271173	2.47092	22.5847	0.801897	4.87271	FALSE	FALSE	FALSE	FALSE
MMETSP0851-20130426|103407_1	0.622994	13.428	5.91151	4.38175	9.67271	5.59201	5.26548	6.03103	6.36664	2.25135	5.44127	0.209438	5.79255	9.37623	6.39724	10.0315	10.065	0.12836	1.75339	2.90319	3.55963	14.0534	4.56829	8.76215	0	1.64728	4.30739	6.41518	6.26492	FALSE	FALSE	FALSE	FALSE
MMETSP0851-20130426|195273_1	0.622994	25.5704	26.5331	33.1761	32.6454	37.28	20.0823	25.8072	20.7324	26.1503	25.5941	30.9968	14.7447	23.5325	23.0301	14.8742	11.1531	22.5913	6.24646	20.5988	17.6434	18.9113	4.88334	33.4759	25.7614	23.2678	10.0118	15.8776	12.0078	FALSE	FALSE	FALSE	FALSE
MMETSP0851-20130426|9001_1	0.622994	1.14281	1.7872	1.40842	3.62727	1.46457	0.367359	3.36616	6.36664	0	0.604585	2.09438	10.7074	19.1202	2.55889	0.864781	0	5.64783	1.86298	8.01833	0.619066	3.29647	0	3.37006	9.21987	3.29456	1.16416	0	2.95843	FALSE	FALSE	FALSE	FALSE
MMETSP0851-20130426|26004_1	0.622994	5.99975	2.88702	7.66807	3.02272	1.73086	1.83679	2.80513	2.12221	6.75406	1.00764	4.81707	7.54787	3.12541	7.54874	6.22642	2.99229	1.15524	0.219174	0.96773	1.70243	2.94947	8.34894	0.449341	5.69463	3.08865	4.77305	3.52835	3.82856	FALSE	FALSE	FALSE	Name=Pfam:Glyco_transf_5; Dbxref=Pfam:PF08323.6; Description=starch synthase catalytic domain; Ontology_term=InterPro:IPR013534; score=30.00; evalue=3.00e-07;
MMETSP0851-20130426|76498_1	0.623623	53.8549	36.1564	34.1151	39.1443	32.4869	66.1246	27.6305	54.3613	11.7763	72.5502	19.2683	31.0692	34.931	26.2287	39.0881	231.766	12.1942	17.4243	23.2255	20.4292	61.9389	109.639	24.4891	67.522	28.8274	24.913	38.0099	30.2804	FALSE	FALSE	FALSE	Name=Pfam:Kelch_1; Dbxref=Pfam:PF01344.20; Description=kelch motif; Ontology_term=InterPro:IPR006652; score=208.30; evalue=4.90e-63;
MMETSP0851-20130426|167842_1	0.624336	4.42839	10.4482	5.47719	5.89431	6.39087	6.12265	13.3244	9.30509	3.46362	27.2063	6.49258	10.3564	2.02232	6.78107	3.28617	8.97686	1.2836	6.79439	5.25339	10.8337	8.50142	9.60916	6.29078	16.5415	5.14775	6.05363	5.93404	9.91945	-	-	-	FALSE
MMETSP0851-20130426|188337_1	0.624336	22.5705	16.9097	14.7102	22.0659	38.212	26.6947	19.3554	33.4657	21.4744	16.5253	57.8049	16.5	42.285	15.3534	15.5661	21.7621	87.1563	49.8621	35.806	38.6916	18.0438	40.4845	33.7006	13.0163	84.8349	25.6115	29.0287	33.4129	EF-hand, calcium binding motif	-	EF-hand_1,EF-hand_5,EF-hand_8,SPARC_Ca_bdg	Name=Pfam:efhand; Dbxref=Pfam:PF00036.27; Description=ef hand; Ontology_term=InterPro:IPR002048; score=56.70; evalue=4.50e-16;
MMETSP0851-20130426|175378_1	0.624336	1.14281	2.06215	2.03439	3.325	3.19543	1.71434	0.841539	11.7538	2.07817	4.63515	0	0	3.67695	2.68684	2.42139	10.065	0.513439	0.876696	0.829483	1.70243	4.85795	5.04087	2.24671	4.88111	1.23546	1.62982	3.20759	2.08831	FALSE	FALSE	FALSE	FALSE
MMETSP0851-20130426|103893_1	0.625583	66.9972	68.601	84.0358	58.1874	149.919	123.433	58.487	167.165	93.3446	737.594	84.4035	90.9256	104.793	95.8306	94.2611	477.406	30.2929	66.7385	44.6538	43.0251	265.279	258.975	77.736	108.198	45.9179	35.3904	49.0761	37.0674	glyceraldehyde-3-phosphate dehydrogenase (NAD(P)+) (phosphorylating) activity	ko:K00134	Gp_dh_C,Gp_dh_N	Name=Pfam:Gp_dh_C; Dbxref=Pfam:PF02800.15; Description=glyceraldehyde 3-phosphate dehydrogenase c-terminal domain; Ontology_term=InterPro:IPR020829; score=166.20; evalue=3.30e-49;
MMETSP0851-20130426|112376_1	0.627921	0.428554	1.64972	0.938947	3.47613	2.66286	0.367359	0.841539	4.08118	0	3.42598	0	0.175532	0	7.54874	3.45912	17.9537	0.385079	1.20546	0.829483	0.309533	9.54241	10.3968	0.449341	0.271173	2.47092	0.931327	8.17935	0.522077	FALSE	FALSE	FALSE	FALSE
MMETSP0851-20130426|191593_1	0.627921	27.5703	28.0453	15.6491	23.275	22.368	24.613	28.4721	35.2614	21.994	66.1013	17.5928	13.6915	30.5187	19.0638	38.0504	106.634	10.9106	11.7258	15.0689	21.203	47.1915	61.1206	18.423	22.5073	19.3555	20.0235	17.8021	16.5324	FALSE	FALSE	FALSE	FALSE
MMETSP0851-20130426|10920_1	0.628928	6.28545	14.5726	11.5803	12.0909	17.9743	18.9802	15.0075	10.6111	11.4299	8.66572	4.60764	8.7766	14.7078	10.2356	24.2139	13.3293	22.9764	25.3146	10.5068	8.82169	10.5834	5.04087	17.2996	5.42345	14.2078	11.9908	14.7549	8.35322	FALSE	FALSE	FALSE	FALSE
MMETSP0851-20130426|81107_1	0.629208	24.2847	30.9323	32.5502	27.2045	22.2349	21.7966	29.5941	51.0964	20.089	13.7039	8.37752	26.6809	42.4688	21.6227	36.4938	245.64	15.4032	13.808	19.2163	23.9888	85.8816	109.639	28.5332	37.1507	21.6205	25.1458	21.8116	20.361	Belongs to the type-B carboxylesterase lipase family	ko:K01050	COesterase	Name=Pfam:COesterase; Dbxref=Pfam:PF00135.23; Description=carboxylesterase family; Ontology_term=InterPro:IPR002018; score=206.80; evalue=5.40e-61;
MMETSP0851-20130426|113885_1	0.629208	17.4278	15.2599	19.4049	12.0909	8.12172	11.0208	15.4282	45.3827	25.804	7.85961	2.93213	17.2021	20.9586	12.6665	19.0252	206.196	6.16127	1.75339	10.092	7.58356	59.6834	86.4824	23.5904	82.9788	20.3851	6.86854	12.1888	8.00517	FALSE	FALSE	FALSE	FALSE
MMETSP0851-20130426|1043_1	0.629208	37.7127	59.2526	231.92	40.5045	107.18	111.8	107.156	142.515	162.444	218.86	32.4629	73.7234	187.157	47.5954	233.837	348.193	203.322	72.1082	35.253	25.846	48.2325	41.5872	26.7358	168.669	49.0066	36.0889	76.6614	35.6752	FALSE	FALSE	FALSE	FALSE
MMETSP0851-20130426|105935_1	0.6319	2.42847	2.19963	3.91228	4.98749	0	6.0002	4.48821	3.91793	0.173181	0.403057	7.95864	2.45745	0	1.1515	7.61007	3.53634	0	1.31504	0.276494	1.8572	1.38799	0.157527	3.8194	0.542345	1.44137	1.86265	1.12266	2.95843	FALSE	FALSE	FALSE	FALSE
MMETSP0851-20130426|195282_1	0.633695	41.1411	27.9078	25.821	26.6	32.3538	34.1644	35.3447	43.0972	29.2676	27.4079	36.8611	17.9043	19.304	28.5317	36.8397	52.229	89.7235	118.354	28.6171	44.418	36.0876	45.2103	23.5904	13.5586	22.856	31.5487	26.3022	25.0597	FALSE	FALSE	FALSE	FALSE
MMETSP0851-20130426|189184_1	0.633695	26.1418	30.3824	8.60701	22.6704	23.4332	18.123	19.2151	19.0999	21.994	50.3821	23.2476	25.2766	54.9704	17.6564	19.89	9.24889	37.2243	5.69852	13.963	23.5245	21.1668	11.1844	14.8283	18.4397	19.3555	12.4565	15.236	11.3117	FALSE	FALSE	FALSE	Name=Pfam:BAG; Dbxref=Pfam:PF02179.11; Description=bag domain; Ontology_term=InterPro:IPR003103; score=33.00; evalue=4.30e-08;
MMETSP0851-20130426|42244_1	0.63383	121.995	113.556	90.4519	115.77	205.173	175.72	81.0683	88.8064	72.5628	33.4537	54.2444	106.723	116.927	96.3424	52.5787	127.852	18.7405	15.5614	48.8012	64.6924	85.5347	29.4576	95.485	74.0301	105.632	57.0438	176.578	45.0726	cellulose 1,4-beta-cellobiosidase activity	ko:K01225,ko:K19357	CBM_1,Glyco_hydro_7	Name=Pfam:Glyco_hydro_7; Dbxref=Pfam:PF00840.15; Description=glycosyl hydrolase family 7; Ontology_term=InterPro:IPR001722; score=573.70; evalue=1.50e-172;
MMETSP0851-20130426|14281_1	0.634536	6.4283	10.1733	9.70245	13.4511	7.45601	17.1434	6.17129	10.7743	28.0553	21.1605	10.8908	0.87766	18.7525	9.08408	13.6635	10.337	1.9254	7.78068	5.66813	12.8456	11.9714	9.60916	4.04407	5.42345	13.796	14.0863	8.50011	15.3142	-	-	-	FALSE
MMETSP0851-20130426|9605_1	0.634536	8.28537	12.2354	16.5881	14.9625	8.12172	14.0821	22.5813	12.4068	12.8154	19.1452	11.1002	17.2021	13.0532	8.31641	7.09121	5.44052	16.9435	2.5205	12.1657	6.96449	8.50142	6.30109	7.41413	1.62704	17.2964	7.91628	10.2643	6.43894	Belongs to the actin family	ko:K05692	Actin	Name=Pfam:Actin; Dbxref=Pfam:PF00022.14; Description=actin; Ontology_term=InterPro:IPR004000; score=162.10; evalue=1.20e-47;
MMETSP0851-20130426|183903_1	0.634536	6.28545	5.91151	8.45052	6.64999	2.92915	3.06132	4.06744	75.5834	2.07817	1.61223	3.56045	8.7766	13.4209	10.3635	6.74529	207.012	2.5672	1.09587	2.07371	3.55963	77.9007	33.3958	4.49341	67.7932	3.08865	1.74624	4.97176	3.82856	helicase activity	ko:K12818	DEAD,HA2,Helicase_C,OB_NTP_bind,S1	FALSE
MMETSP0851-20130426|135056_1	0.634536	37.1413	29.4201	34.2716	41.8647	50.7275	59.5121	46.0042	31.3434	14.5472	27.2063	16.5456	14.2181	24.2679	26.8684	20.9277	23.3942	35.4273	54.136	29.4466	28.7866	23.7693	19.3758	24.7138	33.0831	36.652	16.7639	29.991	17.7506	FALSE	FALSE	FALSE	Name=Pfam:HEAT_2; Dbxref=Pfam:PF13646.1; Description=heat repeats; score=177.30; evalue=4.50e-53;
MMETSP0851-20130426|174938_1	0.634536	37.8556	33.5444	30.9853	28.1113	28.2263	46.5321	43.76	39.9955	13.6813	9.67336	24.5042	28.7872	31.9895	32.7539	30.4403	12.5132	9.62699	22.2462	17.1426	24.9174	37.8226	14.1774	15.7269	22.2362	22.0324	22.119	31.7551	26.7999	FALSE	FALSE	FALSE	Name=Pfam:Kelch_3; Dbxref=Pfam:PF13415.1; Description=galactose oxidase central domain; score=55.00; evalue=5.20e-15;
MMETSP0851-20130426|100447_1	0.634536	1.42851	1.7872	4.69474	1.05795	1.864	2.0817	4.06744	3.75468	2.7709	0	0.628314	1.05319	0	2.81478	2.94026	1.90418	2.95228	5.69852	2.48845	10.5241	3.64346	15.1226	4.94275	0.271173	6.38321	17.5788	3.20759	10.6156	FALSE	FALSE	FALSE	FALSE
MMETSP0851-20130426|137260_1	0.635024	118.424	71.9004	129.105	111.538	48.9966	132.861	57.0844	67.9108	77.0655	3.22445	21.7816	71.4415	127.774	99.1572	159.12	66.6464	63.6665	18.0819	10.5068	25.2269	22.7283	11.4995	4.71808	55.0481	16.061	8.49836	13.1511	14.0961	FALSE	FALSE	FALSE	FALSE
MMETSP0851-20130426|10784_1	0.635024	31.713	36.5689	31.2982	32.6454	29.4246	27.5519	24.2644	33.7922	38.0998	25.5941	10.2625	30.367	61.589	39.1511	23.695	11.4251	47.6215	15.3422	34.147	21.8221	28.1067	20.7936	30.5552	20.338	30.2688	24.6802	42.6609	28.5402	amino acid transport	ko:K13946	Aa_trans	Name=Pfam:Aa_trans; Dbxref=Pfam:PF01490.13; Description=transmembrane amino acid transporter protein; Ontology_term=InterPro:IPR013057; score=148.50; evalue=1.60e-43;
MMETSP0851-20130426|192544_1	0.635024	41.5697	32.0321	23.0042	32.7965	28.0932	30.2459	24.1241	26.6093	11.6031	11.8902	14.4512	20.8883	42.6526	21.4947	26.1164	8.70484	29.1377	21.5886	12.7187	16.4053	18.9113	10.7118	20.6697	21.1515	33.1515	11.4088	13.3115	13.922	Catalyzes the 6-electron oxidation of protoporphyrinogen-IX to form protoporphyrin-IX	ko:K00231	Amino_oxidase	Name=Pfam:Amino_oxidase; Dbxref=Pfam:PF01593.19; Description=flavin containing amine oxidoreductase; Ontology_term=InterPro:IPR002937; score=100.80; evalue=8.10e-29;
MMETSP0851-20130426|9938_1	0.635024	7.57111	16.9097	7.35508	12.6954	9.32001	6.0002	7.85437	6.52989	13.6813	21.7651	0.209438	16.1489	5.69928	18.1682	14.7013	8.43281	44.6692	67.8344	28.3407	18.1077	22.0343	9.76669	8.08814	7.59284	21.6205	19.7907	16.1983	14.2701	Domain of unknown function (DUF4392)	-	DUF4392	Name=Pfam:DUF4392; Dbxref=Pfam:PF14336.1; Description=domain of unknown function (duf4392); Ontology_term=InterPro:IPR025504; score=257.50; evalue=9.30e-77;
MMETSP0851-20130426|145186_1	0.635024	1.14281	4.39926	4.22526	2.41818	3.46172	3.9185	3.64667	10.1213	0	0.806114	6.70202	2.80851	5.14773	1.40739	1.72956	0.272026	0.385079	0.219174	0.829483	0.619066	11.2774	0	35.2733	1.62704	1.23546	0.232832	60.6234	0.870128	FALSE	FALSE	FALSE	FALSE
MMETSP0851-20130426|192722_1	0.635024	35.7128	39.3184	30.5158	43.9806	37.4132	41.8789	39.1316	46.1989	27.709	60.8616	25.1326	37.3883	29.2318	26.6125	27.1541	7.61673	12.9643	9.53407	18.2486	24.4531	28.1067	26.1495	48.0795	20.8803	27.5919	28.8711	45.227	21.9272	FALSE	FALSE	FALSE	FALSE
MMETSP0851-20130426|11812_1	0.635024	4.85694	3.5744	3.12982	1.36023	3.86115	3.42868	0.841539	2.44871	0	0.201528	2.09438	0.526596	4.96389	1.02356	2.94026	1.90418	0	1.09587	0.552988	0.619066	3.29647	0.315054	4.94275	5.42345	3.70638	1.39699	3.20759	3.30648	FALSE	FALSE	FALSE	FALSE
MMETSP0851-20130426|159528_1	0.635024	14.2851	18.2844	17.84	19.0432	25.0309	15.7964	15.4282	15.0187	12.8154	10.2779	3.97932	12.2872	10.2955	15.6093	9.16668	19.0418	3.85079	1.86298	9.4008	12.2266	19.0848	24.4167	12.3569	9.21987	21.6205	10.7103	15.0757	7.30907	FALSE	FALSE	FALSE	FALSE
MMETSP0851-20130426|9676_1	0.635024	14.1423	15.5349	9.70245	7.40567	4.12743	11.3881	13.0439	8.3256	2.94408	4.83668	0	7.54787	5.88312	6.39724	5.01573	3.53634	0	3.94513	2.76494	6.80973	7.46043	6.30109	5.61677	1.08469	8.64822	3.60889	4.49063	2.95843	FALSE	FALSE	FALSE	Name=Pfam:GYF; Dbxref=Pfam:PF02213.11; Description=gyf domain; Ontology_term=InterPro:IPR003169; score=82.10; evalue=1.30e-23;
MMETSP0851-20130426|110690_1	0.635024	5.8569	4.67422	4.69474	4.23181	2.52972	4.04095	3.2259	3.75468	0	7.25502	0	0.87766	6.80236	5.62957	5.01573	22.3061	0	0.328761	1.38247	1.3929	3.99046	2.99302	4.04407	0.542345	2.67683	2.67757	6.41518	1.3922	FALSE	FALSE	FALSE	FALSE
MMETSP0851-20130426|131417_1	0.636988	7.14256	4.81169	5.47719	6.34772	6.52401	4.53076	2.38436	5.38716	2.94408	31.8415	0.628314	7.72341	9.92777	3.96629	6.05347	0	8.72847	1.6438	3.59442	1.70243	0.867491	2.52044	1.57269	11.9316	4.94184	3.95814	3.04721	1.91428	Found in Skp1 protein family	ko:K03094	Skp1_POZ	Name=Pfam:Skp1_POZ; Dbxref=Pfam:PF03931.10; Description=skp1 family tetramerisation domain; Ontology_term=InterPro:IPR016073; score=46.70; evalue=2.00e-12;
MMETSP0851-20130426|143015_1	0.636988	7.42826	5.3616	6.88561	5.13863	10.252	1.71434	4.90898	7.67262	10.2177	3.82904	22.4099	5.09043	7.90545	5.62957	4.32391	21.7621	1.02688	1.97257	1.10598	5.72636	1.38799	5.04087	5.61677	10.5757	10.9132	1.86265	5.61328	3.30648	FALSE	FALSE	FALSE	FALSE
[truncated: 42,232 more rows]
